# Supplementary material for: Insights into the complexity of the excited states of Eu-doped luminescent materials
Source: Royal Society of Chemistry journal article supplement (doi:10.1039/c9qi01455a), 2019-12-17
Supplement: c9qi01455a1.pdf [file c9qi01455a1.pdf]

## Insights on the complexity of the excited states of Eu-doped luminescent materials Electronic Supplementary Information (ESI)

Jonas J. Joos,<sup>1</sup> Philippe F. Smet,<sup>1</sup> Luis Seijo,<sup>2</sup> and Zoila Barandiarán<sup>2</sup>

<sup>1</sup>*LumiLab, Department of Solid State Sciences, and Center for Nano- and Biophotonics (NB Photonics), Ghent University, 9000 Ghent, Belgium*

<sup>2</sup>*Departamento de Química, Instituto Universitario de Ciencia de Materiales Nicolás Cabrera, and Condensed Matter Physics Center (IFIMAC), Universidad Autónoma de Madrid, 28049 Madrid, Spain*

(Dated: November 8, 2019)

### I. INTRODUCTION

Here we describe the details and collect the results of *ab initio* calculations on the electronic structure of  $\text{Eu}^{2+}$  and  $\text{Eu}^{3+}$  ions in alkaline earth fluoride,  $\text{MeF}_2$ , and sulfide,  $\text{MeS}$ , host crystals ( $\text{Me} = \text{Ca}, \text{Sr}, \text{Ba}$ ). They use wave function theory and the embedded cluster approximation and have been performed with the MOLCAS package.<sup>1</sup>

The relativistic second-order Douglas-Kroll-Hess (DKH) many-electron Hamiltonian<sup>2,3</sup> has been used in all calculations. In a first step, the spin-orbit coupling operator is removed from the Hamiltonian so that spin-orbit free state-average restricted-active-space self-consistent-field (SA-RASSCF) variational calculations<sup>4-8</sup> are done on a many-electron active configurational space. The definition of the active spaces are detailed below. These SA-RASSCF calculations take care of the non-dynamic electron correlation. They are in fact multi-configurational SCF calculations in which the molecular orbital coefficients and the configuration interaction expansion coefficients are variational. Subsequently, the SA-RASSCF wave functions are used in multi-state second-order perturbation theory (MS-RASPT2) calculations.<sup>9-13</sup> In this way, dynamic correlation effects in the ground and excited states of the embedded clusters are taken into account. The MS-RASPT2 calculations use the (occupied and empty) molecular orbitals optimized in the SA-RASSCF calculations and some selected electron shells are correlated as described below.

In a second step, the full DKH Hamiltonian is used, the atomic mean-field integrals approximation (AMFI)<sup>14</sup> is adopted for its spin-orbit coupling part, and restricted-active-space state-interaction spin-orbit calculations (RASSI-SO)<sup>15</sup> are done. The RASSI-SO calculations are a particular means to use the spin-free-state-shifting operator (SFSS)<sup>16</sup> in order to efficiently and effectively combine spin-orbit couplings calculated with non-dynamically correlated wave functions (e.g. RASSCF), together with spin-orbit coupling free energies calculated with dynamic correlation (e.g. RASPT2). In them, we chose the transformed RASSCF wave functions (first-order wave functions of the MS-RASPT2 method) of the spin-orbit-free states of interest as a many-electron basis, and the MS-RASPT2 energies as shifting factors.

### A. $\text{MeF}_2$ and $\text{MeS}$ AIMP embedding potentials

The Hamiltonians of the otherwise isolated clusters are supplemented with the *ab initio* model potential (AIMP) embedding operators<sup>17</sup> of  $\text{MeF}_2$  and  $\text{MeS}$  ( $\text{Me} = \text{Ca}, \text{Sr}, \text{Ba}$ ). Those of the  $\text{MeF}_2$  fluorides have been obtained elsewhere;<sup>18</sup> those of the  $\text{MeS}$  rock-salts have been obtained in this work and are available from the authors. The  $\text{MeS}$  embedding potentials have been calculated in self-consistent embedded-ions (SCEI)<sup>19</sup> Hartree-Fock (HF) calculations and they are made of: 1) total-ion embedding AIMPs representing  $\text{Ca}^{2+}$ ,  $\text{Sr}^{2+}$ , or  $\text{Ba}^{2+}$  cations and  $\text{S}^{2-}$  anions, which are located at experimental sites of the  $\text{MeS}$  host lattices within a cube made of  $5 \times 5 \times 5$  unit cells centered on  $\text{Ca}^{2+}$ ,  $\text{Sr}^{2+}$ , or  $\text{Ba}^{2+}$ , depending on the case; and 2) a set of 3309 additional point charges at lattice sites are generated by the zero-multipole method of Gellé and Lepetit,<sup>20</sup> which closely reproduce the Ewald potential<sup>21</sup> within the clusters. The experimental crystal structures of  $\text{CaS}$ ,<sup>22</sup>  $\text{SrS}$ ,<sup>23</sup> and  $\text{BaS}$ <sup>23</sup> are: space group number 225, *Fm-3m* cubic, with lattice constants  $a = 5.710 \text{ \AA}$  ( $\text{CaS}$ ),  $6.021 \text{ \AA}$  ( $\text{SrS}$ ),  $6.3748 \text{ \AA}$  ( $\text{BaS}$ ).

The effect of the AIMP embedding potentials of the  $\text{MeF}_2$  and  $\text{MeS}$  hosts on the studied clusters is to include: 1) host electrostatic interactions (made of long-range point-charge or Madelung contributions and short-range charge density Coulomb contributions), 2) host-cluster exchange interactions, and 3) Pauli repulsion interactions from the host (non-orthogonality repulsive contributions due to cluster-host antisymmetry requirements). The Pauli repulsions from the S  $3p$  shells as obtained in the SCEI calculations are known to be underestimated<sup>24</sup> and they are corrected following the prescriptions in Ref. 24, increasing their associated projection constants in order to achieve the experimental M-S bond length within less than  $0.01 \text{ \AA}$ .

### B. $\text{Eu}^{2+}$ in $\text{MeF}_2$ and $\text{MeS}$

$\text{Eu}^{2+}$  and  $\text{Eu}^{3+}$  ions are assumed to substitute for the alkaline earth  $\text{Ca}^{2+}$ ,  $\text{Sr}^{2+}$ , or  $\text{Ba}^{2+}$  in the fluoride and sulfide hosts leading to 8-fold cubic and 6-fold octahedral coordination, respectively. Non-local charge compensation is assumed for the trivalent dopant in this work.

The Hamiltonian and wave functions of the clusters,

embedded in  $\text{MeF}_2$  or  $\text{MeS}$ , comprise the Eu impurity ion at (0, 0, 0), eight F or six S ligands at variable (x,x,x) or (0,0,x) positions, and twelve or six Me second neighbors at fixed positions,  $(\frac{1}{2}, \frac{1}{2}, 0)$  or  $(1,0,0)$ , respectively, as follows:  $(\text{EuF}_8\text{Me}_{12})^{18+}$ ,  $(\text{EuF}_8\text{Me}_{12})^{19+}$ , or  $(\text{EuS}_6\text{Me}_6)^{2+}$ ,  $(\text{EuS}_6\text{Me}_6)^{3+}$ , for  $\text{Eu}^{2+}$ ,  $\text{Eu}^{3+}$  containing clusters. The embedded cluster calculations include all the electrons of the dopant and ligands and limited representations of the  $\text{Me}^{2+}$  second neighbors, as described next.

The following Gaussian atomic natural orbital relativistic basis sets ANO-RCC for the Europium<sup>25</sup> dopant and the Fluorine or Sulfur ligands,<sup>26</sup> were used to expand the clusters molecular orbitals:  $\text{Eu}(25s22p15d11f4g2h)[9s8p5d4f3g2h]$  (quadruple-zeta with polarization quality) and  $\text{F}(14s9p4d)[5s4p3d]$  or  $\text{S}(17s12p5d)[6s5p3d]$  (quadruple-zeta with polarization without  $f$  nor  $g$ -functions quality). In the Eu-doped  $\text{MeF}_2$  calculations, all occupied shells of the  $\text{Me}^{2+}$  second neighbor ions were considered frozen and their outermost  $s$  and  $p$  orbitals were used, contracted as  $[1s1p]$  orthogonalization functions, for which the  $\text{Me}^{2+}$  embedding AIMP data were used. Five  $s$ -type Gaussian functions were also added to the cluster bases at the next six neighboring interstitial sites.<sup>18</sup> In the Eu-doped  $\text{MeS}$  calculations, the description of the six  $\text{Me}^{2+}$  ions located next to the sulfur ligands in the (100) axes was improved further: only the inner shells of the  $\text{Me}^{2+}$  ions were frozen ([Mg] core for  $\text{Ca}^{2+}$ , [Zn] core for  $\text{Sr}^{2+}$ , and [Cd] core for  $\text{Ba}^{2+}$ ); the corresponding atomic natural orbitals of the ANO-RCC set were used to build the core AIMP operators;<sup>27</sup> the 6-electron valence of the  $\text{Me}^{2+}$  were treated explicitly using the following valence bases, adapted from the ANO-RCC sets:  $\text{Ca}(20s16p6d)[3s4p1d]$ ,  $\text{Sr}(23s19p12d)[3s4p1d]$ ,  $\text{Ba}(26s22p15d)[3s4p1d]$ . Using the  $D_{2h}$  point group in the calculations the number of symmetry adapted basis functions of the fluoride and sulfide clusters is: 469 and 471, respectively.

In the SA-RASSCF calculations on the  $\text{Eu}^{2+}$  clusters we used a restricted active space made of 7 electrons in 20 molecular orbitals of main character  $\text{Eu-}4f$ ,  $\text{Eu-}5d$ ,  $\text{Eu-}6s$ , and  $\text{Eu-}5f$  (6 electrons in 20 MOs for  $\text{Eu}^{3+}$  clusters). We computed the following terms and used the following state-averages for the molecular orbital optimizations: For states in the  $4f^7$  configuration of  $\text{Eu}^{2+}$ , 1  $^8A_{1u}$  term; 2  $^6A_{1u}$ , 2  $^6A_{2u}$ , and 4  $^6E_u$ ; and 6  $^6T_{1u}$  and 6  $^6T_{2u}$  terms. For the  $4f^65d$  and  $4f^66s$  configurations of  $\text{Eu}^{2+}$ , 1  $^8A_{1g}$ , 2  $^8A_{2g}$ , and 3  $^8E_g$ ; 6  $^8T_{1g}$  and 5  $^8T_{2g}$ ; 39  $^6A_{1g}$ , 36  $^6A_{2g}$ , and 75  $^6E_g$ ; and 108  $^6T_{1g}$  and 111  $^6T_{2g}$  terms. For the  $4f^6$  configuration of  $\text{Eu}^{3+}$ , 1  $^7A_{2g}$ ; 1  $^7T_{1g}$  and 1  $^7T_{2g}$ ; and 7  $^5A_{1g}$ , 5  $^5A_{2g}$ , and 13  $^5E_g$ ; 16  $^5T_{1g}$  and 18  $^5T_{2g}$  terms. In all cases, all possible occupations were allowed in the  $\text{Eu-}4f$  shells and up to four electrons were allowed in the  $\text{Eu-}5d$ ,  $\text{Eu-}6s$ , and  $\text{Eu-}5f$  shells (we refer to this calculations as SA-RASSCF( $4f/5d6s5f - 4e$ )); this restricted active space should be fairly close to a complete 7-electron (or 6-electron) active space where all possible occupations of the 20 molecular orbitals would

be allowed. Inclusion of the  $\text{Eu } 5f$ -shells in the active space is needed for a better account of the large radial correlation effects in the  $4f$ -shell, which strongly affect interconfigurational transitions also in the first half of the lanthanide series.<sup>28</sup> The number of configuration state functions (CSF) generated in each spin and  $D_{2h}$  symmetry block range between 4500 and 41500 CSF, for the  $\text{Eu}^{2+}$  clusters, and between 3400 and 24000 CSF, for the  $\text{Eu}^{3+}$  clusters.

In the MS-RASPT2 calculations we correlated all cluster valence electrons except those with main character  $\text{Eu-}4d$ . We used the standard IPEA value (0.25 au)<sup>29</sup> and an imaginary level shift of 0.15 to avoid intruder states.<sup>30</sup> Symmetry analyses of the SA-RASSCF multiconfigurational reference wave functions allowed us to perform MS-RASPT2 calculations over actual spin and  $O_h$  symmetry blocks, which avoids symmetry breakings at the MS-RASPT2 level of calculations and beyond. In the case of the  $\text{MeF}_2$  hosts, small spikes or irregularities in the potential energy surfaces were found coinciding with sharp avoided crossings between some high energy lying spin sextet excited states of the  $4f^65dt_{2g}^1$  and  $4f^6ITE_{a_{1g}}^1$  configurations, which did not disappear using different and reasonable values of MS-RASPT2 parameters. These high energy sextet states were excluded from the subsequent RASSI-SO calculations.

The results of the SA-RASSCF and MS-CASPT2 spin-orbit free calculations for  $\text{Eu}^{2+}$  and  $\text{Eu}^{3+}$  clusters are collected in Tables S1–S3 for the  $\text{MeF}_2$  hosts, and Tables S4–S6 for the  $\text{MeS}$  hosts. Figures S1 and S2 show the corresponding MS-CASPT2 energy curves.

Finally, the spin-orbit coupling calculations (RASSI-SO) were done allowing the coupling of all MS-RASPT2 states of spin multiplicity  $2S + 1 \geq 6$  for  $\text{Eu}^{2+}$  and  $2S + 1 \geq 5$  for  $\text{Eu}^{3+}$  mentioned above. Ultimately, the quality of all of the limitations imposed on the extent of spin-orbit coupling should be revealed by the comparisons between theoretical and experimental spectra discussed in the main body of this paper.

The results of the spin-orbit coupling RASSI-SO calculations for  $\text{Eu}^{2+}$  and  $\text{Eu}^{3+}$  cluster are collected in Tables S9–S11 for the  $\text{MeF}_2$  hosts, and Tables S12–S14 for the  $\text{MeS}$  hosts. The corresponding energy curves for  $\text{Eu}^{2+}$  and  $\text{Eu}^{3+}$  are in Fig. 3 of the paper and here in Fig. S3, respectively.

### C. Accuracy of the computed energies

Calculated and experimental energies are compared in Table S15 and Fig. 2. It is based on the results of this work and experimental excitation energies for the  $\text{Eu}^{2+}$ - and  $\text{Eu}^{3+}$ -doped fluoride and sulfide crystals. This table displays only those levels for which experimental spectroscopic data is available. All computed energies can be found in Tables S9–S14.

- <sup>1</sup> G. Karlström, R. Lindh, P. A. Malmqvist, B. O. Roos, U. Ryde, V. Veryazov, P. O. Widmark, M. Cossi, B. Schimmelpfennig, P. Neogrady, and L. Seijo, "Molcas: A program package for computational chemistry," *Comput. Mater. Sci.* **28**, 222–239 (2003).
- <sup>2</sup> M. Douglas and N. M. Kroll, "Quantum electrodynamical corrections to the fine structure of helium," *Ann. Phys. (N.Y.)* **82**, 89–155 (1974).
- <sup>3</sup> B. A. Hess, "Relativistic electronic-structure calculations employing a two-component no-pair formalism with external-field projection operators," *Phys. Rev. A* **33**, 3742–3748 (1986).
- <sup>4</sup> B. O. Roos, P. R. Taylor, and P. E. M. Siegbahn, "A complete active space SCF method (CASSCF) using a density-matrix formulated super-CI approach," *Chem. Phys.* **48**, 157–173 (1980).
- <sup>5</sup> P. E. M. Siegbahn, A. Heiberg, B. O. Roos, and B. Levy, "Comparison of the super-CI and the newton-raphson scheme in the complete active space SCF method," *Phys. Scr.* **21**, 323–327 (1980).
- <sup>6</sup> P. E. M. Siegbahn, A. Heiberg, J. Almlöf, and B. O. Roos, "The complete active space SCF (CASSCF) method in a newton-raphson formulation with application to the HNO molecule," *J. Chem. Phys.* **74**, 2384–2396 (1981).
- <sup>7</sup> J. Olsen, B. O. Roos, P. Jørgensen, and J. A. Jensen, "Determinant based configuration interaction algorithms for complete and restricted configuration interaction spaces," *J. Chem. Phys.* **89**, 2185–2192 (1988).
- <sup>8</sup> P.-Å. Malmqvist, A. Rendell, and B. O. Roos, "The restricted active space self-consistent-field method, implemented with a split graph unitary group approach," *J. Phys. Chem.* **94**, 5477–5482 (1990).
- <sup>9</sup> K. Andersson, P.-Å. Malmqvist, B. O. Roos, A. J. Sadlej, and K. Wolinski, "Second-order perturbation theory with a CASSCF reference function," *J. Phys. Chem.* **94**, 5483–5488 (1990).
- <sup>10</sup> K. Andersson, P.-Å. Malmqvist, and B. O. Roos, "Second-order perturbation theory with a complete active space self-consistent field reference function," *J. Chem. Phys.* **96**, 1218–1226 (1992).
- <sup>11</sup> A. Zaitsevskii and J.-P. Malrieu, "Multi-partitioning quasidegenerate perturbation theory. A new approach to multireference Møller-Plesset perturbation theory," *Chem. Phys. Lett.* **233**, 597–604 (1995).
- <sup>12</sup> J. Finley, P.-Å. Malmqvist, B. O. Roos, and L. Serrano-Andrés, "The multi-state CASPT2 method," *Chem. Phys. Lett.* **288**, 299–306 (1998).
- <sup>13</sup> P.-Å. Malmqvist, K. Pierloot, A. R. Moughal Shahi, C. J. Cramer and L. Gagliardi, "The restricted active space followed by second-order perturbation theory method: Theory and application to the study of CuO<sub>2</sub> and Cu<sub>2</sub>O<sub>2</sub> systems," *J. Chem. Phys.* **128**, 204109 (2008).
- <sup>14</sup> B. A. Hess, C. M. Marian, U. Wahlgren, and O. Gropen, "A mean-field spin-orbit method applicable to correlated wavefunctions," *Chem. Phys. Lett.* **251**, 365–371 (1996).
- <sup>15</sup> P. A. Malmqvist, B. O. Roos, and B. Schimmelpfennig, "The RASSI approach with spin-orbit coupling," *Chem. Phys. Lett.* **357**, 230–240 (2002).
- <sup>16</sup> R. Llugar, M. Casarrubios, Z. Barandiarán, and L. Seijo, "Ab initio model potential calculations on the electronic spectrum of Ni<sup>2+</sup>-doped MgO including correlation, spin-orbit and embedding effects," *J. Chem. Phys.* **105**, 5321–5330 (1996).
- <sup>17</sup> Z. Barandiarán and L. Seijo, "The ab initio model potential representation of the crystalline environment. Theoretical study of the local distortion on NaCl:Cu<sup>+</sup>," *J. Chem. Phys.* **89**, 5739–5746 (1988).
- <sup>18</sup> Z. Barandiarán and L. Seijo, "Intervalence charge transfer luminescence: Interplay between anomalous and 5d – 4f emissions in Yb-doped fluorite-type crystals," *J. Chem. Phys.* **141**, 234704 (2014).
- <sup>19</sup> L. Seijo and Z. Barandiarán, "Ab initio model potential study of local distortions around Cr<sup>+</sup> and Cr<sup>3+</sup>," *J. Chem. Phys.* **94**, 8158–8164 (1991).
- <sup>20</sup> A. Gellé and M.-B. Lepetit, "Fast calculation of the electrostatic potential in ionic crystals by direct summation method," *J. Chem. Phys.* **128**, 244716 (2008).
- <sup>21</sup> P. P. Ewald, "Die berechnung optischer und elektrostatischer gitterpotentiale," *Ann. Phys.* **369**, 253–287 (1921).
- <sup>22</sup> T. Kobayashi, K. Susa, and S. Taniguchi, "Preparation and semiconductive properties of rock salt type solid solution systems, Cd<sub>1-x</sub>M<sub>x</sub>S (M = Sr, Ca, Mg, Pb, Sn)," *J. Phys. Chem. Solids* **40**, 781–785 (1979).
- <sup>23</sup> R. W. G. Wyckoff, *Crystal Structures* (Wiley, New York, 1963).
- <sup>24</sup> J. L. Pascual, N. Barros, Z. Barandiarán, and L. Seijo, "Improved embedding ab initio model potentials for embedded cluster calculations," *J. Phys. Chem. A* **113**, 12454–12460 (2009).
- <sup>25</sup> B. O. Roos, R. Lindh, P. A. Malmqvist, V. Veryazov, P. O. Widmark and A. C. Borin, "New relativistic atomic natural orbital basis sets for lanthanide atoms with applications to the Ce diatom and LuF<sub>3</sub>," *J. Phys. Chem. A* **112**, 11431–11435 (2008).
- <sup>26</sup> B. O. Roos, R. Lindh, P. A. Malmqvist, V. Veryazov, and P. O. Widmark, "Main group atoms and dimers studied with a new relativistic ANO basis set," *J. Phys. Chem. A* **108**, 2851–2858 (2004).
- <sup>27</sup> L. Seijo and Z. Barandiarán, "The ab initio model potential method: A common strategy for effective core potential and embedded cluster calculations," in *Computational Chemistry: Reviews of Current Trends*, Vol. 4, edited by J. Leszczyński (World Scientific, Singapore, 1999) pp. 55–152.
- <sup>28</sup> Z. Barandiarán and L. Seijo, "Radial correlation effects on interconfigurational excitations at the end of the lanthanide series: A restricted active space second order perturbation study of Yb<sup>2+</sup> and SrCl<sub>2</sub>:Yb<sup>2+</sup>," *J. Chem. Phys.* **138**, 074102 (2013).
- <sup>29</sup> G. Ghigo, B. O. Roos, and P.-Å. Malmqvist, "A modified definition of the zeroth-order hamiltonian in multiconfigurational perturbation theory (caspt2)," *Chem. Phys. Lett.* **396**, 142 (2004).
- <sup>30</sup> N. Forsberg and P.-Å. Malmqvist, "Multiconfiguration perturbation theory with imaginary level shift," *Chem. Phys. Lett.* **274**, 196 (1997).
- <sup>31</sup> R. D. Shannon, "Revised effective ionic radii and systematic studies of interatomic distances in halides and chalcogenides," *Acta Crystallogr. A* **32**, 751–767 (1976).
- <sup>32</sup> M. C. Downer, C. D. Corderomontalvo, and H. Crosswhite, "Study of new 4f<sup>7</sup> levels of Eu<sup>2+</sup> in CaF<sub>2</sub> and SrF<sub>2</sub> using two-photon absorption-spectroscopy," *Phys. Rev. B*

- 28**, 4931–4943 (1983).
- <sup>33</sup> C. Dujardin, B. Moine, and C. Pedrini, “One-photon and two-photon spectroscopy of  $f \rightarrow d$  and  $f \rightarrow f$  transitions of  $\text{Eu}^{2+}$  ions in  $\text{M}_{1-x}\text{N}_x\text{F}_2$  mixed fluoride-crystals ( $\text{M}, \text{N} = \text{Ba}, \text{Sr}, \text{Ca}; 0 \leq x \leq 1$ ),” *J. Lumin.* **54**, 259–270 (1993).
- <sup>34</sup> C. Pedrini, M. F. Joubert, and D. S. McClure, “Photoionization processes of rare-earth dopant ions in ionic crystals,” *J. Lumin.* **125**, 230–237 (2007).
- <sup>35</sup> S. V. Gastev, J. K. Choi, and R. J. Reeves, “Laser spectroscopy of  $\text{Eu}^{3+}$  cubic centers in the  $\text{CaF}_2$  bulk single crystal,” *Phys. Solid State* **51**, 44–49 (2009).
- <sup>36</sup> N. Yamashita, S. Fukumoto, S. Ibuki, and H. Ohnishi, “Photoluminescence of  $\text{Eu}^{2+}$  and  $\text{Eu}^{3+}$  centers in  $\text{CaS}:\text{Eu}, \text{Na}$  phosphors,” *Jpn. J. Appl. Phys.* **32**, 3135–3139 (1993).
- <sup>37</sup> N. Yamashita, O. Harada, and K. Nakamura, “Photoluminescence spectra of  $\text{Eu}^{2+}$  centers in  $\text{Ca}(\text{S}, \text{Se})\text{Eu}$  and  $\text{Sr}(\text{S}, \text{Se})\text{Eu}$ ,” *Jpn. J. Appl. Phys.* **34**, 5539–5545 (1995).
- <sup>38</sup> P. F. Smet, J. E. Van Haecke, F. Loncke, H. Vrielinck, F. Callens, and D. Poelman, “Anomalous photoluminescence in  $\text{BaS}:\text{Eu}$ ,” *Phys. Rev. B* **74** (2006).

TABLE S1: Spectroscopic constants of the ground and excited states of  $\text{Eu}^{2+}$  and  $\text{Eu}^{3+}$  -doped  $\text{CaF}_2$  cubic defects calculated using the relativistic spin-free second order Douglas-Kroll-Hess Hamiltonian with AIMP  $\text{CaF}_2$  embedding. The embedded cluster RASSCF results include basic bonding interactions and  $4f$ -shell radial correlation; the MS-RASPT2 ones include also dynamic correlation of 79 or 78 valence electrons in the Eu  $5s, 5p$ , F  $2s, 2p$ , closed shells and Eu  $4f, 5d, 6s$  open shells. Eu-F bond distances ( $d_{\text{Eu-F},e}$  in Å),  $\text{EuF}_8$  breathing mode harmonic vibrational frequencies ( $\omega_{a_{1g}}$  in  $\text{cm}^{-1}$ ), and minimum-to-minimum energy differences ( $T_e$  in  $\text{cm}^{-1}$ ) are given. See Figs. S1, S2 and text for details.

| term                                       | RASSCF              |                   |       | MS-RASPT2           |                   |       |
|--------------------------------------------|---------------------|-------------------|-------|---------------------|-------------------|-------|
|                                            | $d_{\text{Eu-F},e}$ | $\omega_{a_{1g}}$ | $T_e$ | $d_{\text{Eu-F},e}$ | $\omega_{a_{1g}}$ | $T_e$ |
| $\text{Eu}^{2+}$ -doped $\text{CaF}_2$     |                     |                   |       |                     |                   |       |
| $4f^7(^8F)$                                |                     |                   |       |                     |                   |       |
| $1^8A_{1u}$                                | 2.433               | 416               | 0     | 2.388               | 423               | 0     |
| $4f^6(5d + ITE_{a_{1g}})^1$ excited states |                     |                   |       |                     |                   |       |
| $4f^6(^7F)5de_g^1$                         |                     |                   |       |                     |                   |       |
| Octets                                     |                     |                   |       |                     |                   |       |
| $1^8T_{2g}$                                | 2.419               | 420               | 24344 | 2.372               | 429               | 27329 |
| $1^8E_g$                                   | 2.417               | 420               | 24709 | 2.370               | 423               | 27804 |
| $1^8T_{1g}$                                | 2.419               | 420               | 25333 | 2.373               | 429               | 28008 |
| $2^8T_{1g}$                                | 2.419               | 420               | 26392 | 2.373               | 429               | 29265 |
| $2^8T_{2g}$                                | 2.418               | 420               | 28127 | 2.372               | 429               | 30178 |
| Sextets                                    |                     |                   |       |                     |                   |       |
| $1^6T_{1g}$                                | 2.420               | 419               | 30627 | 2.372               | 427               | 31468 |
| $1^6T_{2g}$                                | 2.418               | 420               | 34491 | 2.370               | 430               | 34362 |
| $1^6E_g$                                   | 2.416               | 419               | 35180 | 2.366               | 428               | 34942 |
| $2^6T_{1g}$                                | 2.418               | 419               | 35857 | 2.370               | 430               | 35142 |
| $2^6T_{2g}$                                | 2.417               | 420               | 38708 | 2.369               | 429               | 37059 |
| $4f^6(^7F)(5dt_{2g}^1 + ITE_{a_{1g}}^1)^a$ |                     |                   |       |                     |                   |       |
| Octets                                     |                     |                   |       |                     |                   |       |
| $3^8T_{1g}$                                | 2.466               | 414               | 44495 | 2.418               | 407               | 47987 |
| $3^8T_{2g}$                                | 2.467               | 414               | 43971 | 2.421               | 406               | 48085 |
| $2^8E_g$                                   | 2.467               | 414               | 43750 | 2.421               | 420               | 48122 |
| $1^8A_{2g}$                                | 2.467               | 413               | 48041 | 2.312               | 403               | 48572 |
| $4^8T_{1g}$                                | 2.467               | 414               | 46877 | 2.380               | 406               | 49474 |
| $4^8T_{2g}$                                | 2.468               | 414               | 48102 | 2.354               | 758               | 50161 |
| $3^8E_g$                                   | 2.467               | 414               | 47453 | 2.421               | 419               | 51029 |
| $5^8T_{1g}$                                | 2.467               | 412               | 48842 | 2.376               | 456               | 51179 |
| $2^8A_{2g}$                                | 2.400               | 870               | 51527 | 2.399               | 1060              | 51591 |
| $5^8T_{2g}$                                | 2.400               | 867               | 51644 | 2.394               | 622               | 51819 |
| $6^8T_{1g}$                                | 2.401               | 962               | 51567 | 2.397               | 834               | 51968 |
| $1^8A_{1g}$                                | 2.467               | 413               | 48888 | 2.421               | 419               | 51984 |
| $4f^7$ excited states                      |                     |                   |       |                     |                   |       |
| $4f^7(^6P)$                                |                     |                   |       |                     |                   |       |
| $1^6T_{1u}$                                | 2.432               | 416               | 33652 | 2.386               | 422               | 30587 |
| $4f^7(^6I)$                                |                     |                   |       |                     |                   |       |
| $1^6T_{2u}$                                | 2.432               | 416               | 37088 | 2.386               | 422               | 34192 |
| $1^6E_u$                                   | 2.432               | 416               | 37108 | 2.386               | 423               | 34424 |

|                                        |       |     |       |       |     |       |
|----------------------------------------|-------|-----|-------|-------|-----|-------|
| 1 ${}^6A_{2u}$                         | 2.432 | 416 | 37117 | 2.386 | 422 | 34553 |
| 2 ${}^6T_{2u}$                         | 2.432 | 415 | 37277 | 2.386 | 422 | 34560 |
| 1 ${}^6A_{1u}$                         | 2.432 | 416 | 37375 | 2.386 | 422 | 34701 |
| 2 ${}^6T_{1u}$                         | 2.433 | 416 | 37359 | 2.386 | 423 | 34705 |
| $4f^7({}^6D)$                          |       |     |       |       |     |       |
| 2 ${}^6E_u$                            | 2.432 | 416 | 41048 | 2.385 | 423 | 37164 |
| 3 ${}^6T_{2u}$                         | 2.432 | 416 | 41198 | 2.386 | 422 | 37294 |
| $4f^7({}^6G, {}^6F)$                   |       |     |       |       |     |       |
| 4 ${}^6T_{2u}$                         | 2.429 | 416 | 54808 | 2.383 | 423 | 48989 |
| 3 ${}^6T_{1u}$                         | 2.429 | 416 | 55007 | 2.383 | 422 | 49254 |
| 3 ${}^6E_u$                            | 2.432 | 416 | 55369 | 2.386 | 422 | 49298 |
| 2 ${}^6A_{2u}$                         | 2.431 | 416 | 55387 | 2.385 | 423 | 49723 |
| 2 ${}^6A_{1u}$                         | 2.433 | 415 | 56104 | 2.387 | 422 | 50047 |
| 5 ${}^6T_{2u}$                         | 2.432 | 416 | 55651 | 2.386 | 422 | 50263 |
| 4 ${}^6T_{1u}$                         | 2.433 | 416 | 56051 | 2.387 | 422 | 50517 |
| $4f^7({}^6H)$                          |       |     |       |       |     |       |
| 5 ${}^6T_{1u}$                         | 2.431 | 416 | 60996 | 2.384 | 423 | 54720 |
| 4 ${}^6E_u$                            | 2.431 | 416 | 61118 | 2.384 | 422 | 54796 |
| 6 ${}^6T_{1u}$                         | 2.432 | 416 | 61532 | 2.386 | 423 | 55261 |
| 6 ${}^6T_{2u}$                         | 2.432 | 416 | 61626 | 2.387 | 423 | 55411 |
| $\text{Eu}^{3+}$ -doped $\text{CaF}_2$ |       |     |       |       |     |       |
| $4f^6({}^7F)$ <sup>a</sup>             |       |     |       |       |     |       |
| 1 ${}^7A_{2g}$                         | 2.290 | 488 | 0     | 2.257 | 501 | 0     |
| 1 ${}^7T_{1g}$                         | 2.293 | 488 | 1215  | 2.261 | 493 | 1532  |
| 1 ${}^7T_{2g}$                         | 2.294 | 488 | 1485  | 2.262 | 495 | 1663  |
| $4f^6({}^5D)$                          |       |     |       |       |     |       |
| 1 ${}^5E_g$                            | 2.292 | 488 | 23818 | 2.260 | 493 | 22107 |
| 1 ${}^5T_{2g}$                         | 2.292 | 488 | 23977 | 2.260 | 493 | 22239 |
| $4f^6({}^5L, {}^5G)$                   |       |     |       |       |     |       |
| 2 ${}^5E_g$                            | 2.290 | 488 | 27372 | 2.258 | 493 | 26362 |
| 1 ${}^5T_{1g}$                         | 2.290 | 488 | 27419 | 2.258 | 493 | 26451 |
| 1 ${}^5A_{1g}$                         | 2.290 | 488 | 27444 | 2.258 | 493 | 26676 |
| 2 ${}^5T_{2g}$                         | 2.292 | 487 | 28136 | 2.259 | 496 | 26702 |
| 2 ${}^5T_{1g}$                         | 2.292 | 488 | 28148 | 2.261 | 494 | 27288 |
| 3 ${}^5E_g$                            | 2.292 | 488 | 28329 | 2.260 | 494 | 27314 |
| 3 ${}^5T_{2g}$                         | 2.292 | 488 | 28337 | 2.261 | 493 | 27808 |
| 3 ${}^5T_{1g}$                         | 2.292 | 488 | 28941 | 2.260 | 494 | 27819 |
| 2 ${}^5A_{1g}$                         | 2.294 | 488 | 29209 | 2.262 | 494 | 27841 |
| 4 ${}^5E_g$                            | 2.292 | 489 | 28793 | 2.261 | 495 | 28031 |
| 4 ${}^5T_{2g}$                         | 2.293 | 489 | 28684 | 2.263 | 492 | 28240 |

<sup>a</sup> Mixings and avoided crossings between states of the  $4f^6({}^7F)5dt_{2g}^1$  and  $4f^6({}^7F)ITE_{a_{1g}}^1$  configurations make most energy curves strongly anharmonic. The shape of the energy curves can be seen in Fig. S1. A value of  $d_{\text{Eu-F},e}$  for states of the  $4f^6({}^7F)5dt_{2g}^1$  configuration of about 2.421 Å can be deduced from states in the  ${}^8E_g$  and  ${}^8A_{1g}$  symmetry blocks where the  $4f^6({}^7F) \times ITE_{a_{1g}}$  coupling is absent.

<sup>b</sup> The energy difference between the  $\text{Eu}^{3+} 4f^6 - 1{}^7A_{2g}$  and the  $\text{Eu}^{2+} 4f^7 - 1{}^8A_{1u}$  minima at MS-RASPT2 level is  $17494 \text{ cm}^{-1}$ .

TABLE S2: Spectroscopic constants of the ground and excited states of  $\text{Eu}^{2+}$  and  $\text{Eu}^{3+}$  -doped  $\text{SrF}_2$  cubic defects calculated using the relativistic spin-free second order Douglas-Kroll-Hess Hamiltonian with AIMP  $\text{SrF}_2$  embedding. The embedded cluster RASSCF results include basic bonding interactions and  $4f$ -shell radial correlation; the MS-RASPT2 ones include also dynamic correlation of 79 or 78 valence electrons in the  $\text{Eu } 5s, 5p, \text{F } 2s, 2p$ , closed shells and  $\text{Eu } 4f, 5d, 6s$  open shells.  $\text{Eu-F}$  bond distances ( $d_{\text{Eu-F},e}$  in Å),  $\text{EuF}_8$  breathing mode harmonic vibrational frequencies ( $\omega_{a_{1g}}$  in  $\text{cm}^{-1}$ ), and minimum-to-minimum energy differences ( $T_e$  in  $\text{cm}^{-1}$ ) are given. See Figs. S1, S2 and text for details.

| term                                       | RASSCF              |                   |       | MS-RASPT2           |                   |       |
|--------------------------------------------|---------------------|-------------------|-------|---------------------|-------------------|-------|
|                                            | $d_{\text{Eu-F},e}$ | $\omega_{a_{1g}}$ | $T_e$ | $d_{\text{Eu-F},e}$ | $\omega_{a_{1g}}$ | $T_e$ |
| $\text{Eu}^{2+}$ -doped $\text{SrF}_2$     |                     |                   |       |                     |                   |       |
| $4f^7(^8F)$                                |                     |                   |       |                     |                   |       |
| $1^8 A_{1u}$                               | 2.522               | 363               | 0     | 2.470               | 370               | 0     |
| $4f^6(5d + ITE_{a_{1g}})^1$ excited states |                     |                   |       |                     |                   |       |
| $4f^6(^7F)5de_g^1$                         |                     |                   |       |                     |                   |       |
| Octets                                     |                     |                   |       |                     |                   |       |
| $1^8 T_{2g}$                               | 2.506               | 366               | 25443 | 2.451               | 371               | 28455 |
| $1^8 E_g$                                  | 2.503               | 363               | 25933 | 2.448               | 374               | 29048 |
| $1^8 T_{1g}$                               | 2.506               | 365               | 26378 | 2.451               | 366               | 29114 |
| $2^8 T_{1g}$                               | 2.506               | 365               | 27436 | 2.451               | 377               | 30359 |
| $2^8 T_{2g}$                               | 2.505               | 365               | 29232 | 2.450               | 362               | 31344 |
| Sextets                                    |                     |                   |       |                     |                   |       |
| $1^6 T_{1g}$                               | 2.506               | 365               | 31590 | 2.451               | 372               | 32521 |
| $1^6 T_{2g}$                               | 2.504               | 364               | 35498 | 2.448               | 360               | 35531 |
| $1^6 E_g$                                  | 2.502               | 360               | 36320 | 2.444               | 372               | 36179 |
| $2^6 T_{1g}$                               | 2.505               | 364               | 36826 | 2.449               | 365               | 36292 |
| $2^6 T_{2g}$                               | 2.502               | 362               | 39728 | 2.448               | 375               | 38266 |
| $4f^6(^7F)(5dt_{2g}^1 + ITE_{a_{1g}}^1)^a$ |                     |                   |       |                     |                   |       |
| Octets                                     |                     |                   |       |                     |                   |       |
| $3^8 T_{2g}$                               | 2.558               | 363               | 41696 | 2.503               | 430               | 45834 |
| $3^8 T_{1g}$                               | 2.555               | 363               | 42315 | 2.501               | 522               | 45862 |
| $2^8 E_g$                                  | 2.557               | 363               | 41455 | 2.504               | 364               | 45864 |
| $4^8 T_{1g}$                               | 2.557               | 363               | 44592 | 2.502               | 465               | 47230 |
| $1^8 A_{2g}$                               | 2.558               | 362               | 45705 | 2.374               | 332               | 47522 |
| $3^8 E_g$                                  | 2.557               | 363               | 45158 | 2.503               | 367               | 48766 |
| $4^8 T_{2g}$                               | 2.558               | 362               | 45750 | 2.498               | 344               | 48922 |
| $5^8 T_{1g}$                               | 2.558               | 362               | 46529 | 2.462               | 382               | 48981 |
| $1^8 A_{1g}$                               | 2.558               | 362               | 46545 | 2.504               | 367               | 49692 |
| $5^8 T_{2g}$                               | 2.462               | 597               | 49705 | 2.451               | 932               | 50005 |
| $2^8 A_{2g}$                               | 2.462               | 588               | 49734 | 2.460               | 524               | 50108 |
| $6^8 T_{1g}$                               | 2.470               | 553               | 49974 | 2.458               | 518               | 50492 |
| $4f^7$ excited states                      |                     |                   |       |                     |                   |       |
| $4f^7(^6P)$                                |                     |                   |       |                     |                   |       |
| $1^6 T_{1u}$                               | 2.522               | 362               | 33747 | 2.469               | 369               | 30725 |
| $4f^7(^6I)$                                |                     |                   |       |                     |                   |       |
| $1^6 T_{2u}$                               | 2.522               | 363               | 37184 | 2.468               | 369               | 34372 |
| $1^6 E_u$                                  | 2.521               | 363               | 37206 | 2.468               | 370               | 34585 |

|                                        |       |     |       |       |     |       |
|----------------------------------------|-------|-----|-------|-------|-----|-------|
| 2 ${}^6T_{2u}$                         | 2.522 | 363 | 37356 | 2.469 | 369 | 34713 |
| 1 ${}^6A_{2u}$                         | 2.522 | 363 | 37206 | 2.469 | 369 | 34713 |
| 1 ${}^6A_{1u}$                         | 2.522 | 363 | 37431 | 2.469 | 369 | 34811 |
| 2 ${}^6T_{1u}$                         | 2.522 | 363 | 37410 | 2.469 | 369 | 34819 |
| $4f^7({}^6D)$                          |       |     |       |       |     |       |
| 2 ${}^6E_u$                            | 2.521 | 363 | 41156 | 2.468 | 370 | 37346 |
| 3 ${}^6T_{2u}$                         | 2.522 | 362 | 41288 | 2.469 | 369 | 37454 |
| $4f^7({}^6G, {}^6F)$                   |       |     |       |       |     |       |
| 4 ${}^6T_{2u}$                         | 2.519 | 362 | 55029 | 2.466 | 369 | 49353 |
| 3 ${}^6E_u$                            | 2.521 | 363 | 55497 | 2.467 | 370 | 49494 |
| 3 ${}^6T_{1u}$                         | 2.519 | 362 | 55235 | 2.466 | 369 | 49557 |
| 2 ${}^6A_{2u}$                         | 2.521 | 363 | 55518 | 2.467 | 370 | 49951 |
| 2 ${}^6A_{1u}$                         | 2.522 | 363 | 56111 | 2.470 | 369 | 50135 |
| 5 ${}^6T_{2u}$                         | 2.522 | 363 | 55746 | 2.469 | 369 | 50404 |
| 4 ${}^6T_{1u}$                         | 2.523 | 363 | 56043 | 2.470 | 369 | 50582 |
| $4f^7({}^6H)$                          |       |     |       |       |     |       |
| 5 ${}^6T_{1u}$                         | 2.520 | 363 | 61170 | 2.467 | 369 | 55007 |
| 4 ${}^6E_u$                            | 2.520 | 363 | 61293 | 2.467 | 370 | 55073 |
| 6 ${}^6T_{1u}$                         | 2.522 | 363 | 61612 | 2.469 | 370 | 55401 |
| 6 ${}^6T_{2u}$                         | 2.522 | 363 | 61682 | 2.469 | 370 | 55561 |
| $\text{Eu}^{3+}$ -doped $\text{SrF}_2$ |       |     |       |       |     |       |
| $4f^6({}^7F)^b$                        |       |     |       |       |     |       |
| 1 ${}^7A_{2g}$                         | 2.346 | 436 | 0     | 2.310 | 440 | 0     |
| 1 ${}^7T_{1g}$                         | 2.349 | 432 | 1037  | 2.314 | 447 | 1265  |
| 1 ${}^7T_{2g}$                         | 2.349 | 431 | 1281  | 2.315 | 445 | 1387  |
| $4f^6({}^5D)$                          |       |     |       |       |     |       |
| 1 ${}^5E_g$                            | 2.347 | 434 | 23717 | 2.311 | 449 | 21930 |
| 1 ${}^5T_{2g}$                         | 2.348 | 432 | 23858 | 2.313 | 447 | 22047 |
| $4f^6({}^5L, {}^5G)$                   |       |     |       |       |     |       |
| 2 ${}^5E_g$                            | 2.346 | 436 | 27364 | 2.310 | 448 | 26282 |
| 1 ${}^5T_{1g}$                         | 2.346 | 436 | 27400 | 2.310 | 448 | 26362 |
| 1 ${}^5A_{1g}$                         | 2.346 | 435 | 27413 | 2.310 | 449 | 26577 |
| 2 ${}^5T_{2g}$                         | 2.348 | 432 | 28021 | 2.310 | 448 | 26615 |
| 2 ${}^5T_{1g}$                         | 2.348 | 433 | 28010 | 2.313 | 448 | 27059 |
| 3 ${}^5E_g$                            | 2.349 | 432 | 28171 | 2.312 | 449 | 27133 |
| 2 ${}^5A_{1g}$                         | 2.349 | 431 | 28999 | 2.314 | 450 | 27539 |
| 3 ${}^5T_{2g}$                         | 2.349 | 431 | 28174 | 2.314 | 445 | 27540 |
| 3 ${}^5T_{1g}$                         | 2.349 | 432 | 28788 | 2.313 | 447 | 27604 |
| 4 ${}^5E_g$                            | 2.349 | 432 | 28639 | 2.313 | 448 | 27759 |
| 4 ${}^5T_{2g}$                         | 2.349 | 433 | 28521 | 2.315 | 450 | 27843 |

<sup>a</sup> Mixings and avoided crossings between states of the  $4f^6({}^7F)5dt_{2g}^1$  and  $4f^6({}^7F)ITE_{a_{1g}}^1$  configurations make most energy curves strongly anharmonic. The shape of the energy curves can be seen in Fig. S1. A value of  $d_{\text{Eu-F},e}$  for states of the  $4f^6({}^7F)5dt_{2g}^1$  configuration of about 2.504 Å can be deduced from states in the  ${}^8E_g$  and  ${}^8A_{1g}$  symmetry blocks where the  $4f^6({}^7F) \times ITE_{a_{1g}}$  coupling is absent.

<sup>b</sup> The energy difference between the  $\text{Eu}^{3+} 4f^6 - 1{}^7A_{2g}$  and the  $\text{Eu}^{2+} 4f^7 - 1{}^8A_{1u}$  minima at MS-RASPT2 level is 18459  $\text{cm}^{-1}$ .



TABLE S3: Spectroscopic constants of the ground and excited states of  $\text{Eu}^{2+}$  and  $\text{Eu}^{3+}$  -doped  $\text{BaF}_2$  cubic defects calculated using the relativistic spin-free second order Douglas-Kroll-Hess Hamiltonian with AIMP  $\text{BaF}_2$  embedding. The embedded cluster RASSCF results include basic bonding interactions and  $4f$ -shell radial correlation; the MS-RASPT2 ones include also dynamic correlation of 79 or 78 valence electrons in the  $\text{Eu } 5s, 5p$ ,  $\text{F } 2s, 2p$ , closed shells and  $\text{Eu } 4f, 5d, 6s$  open shells.  $\text{Eu-F}$  bond distances ( $d_{\text{Eu-F},e}$  in Å),  $\text{EuF}_8$  breathing mode harmonic vibrational frequencies ( $\omega_{a_{1g}}$  in  $\text{cm}^{-1}$ ), and minimum-to-minimum energy differences ( $T_e$  in  $\text{cm}^{-1}$ ) are given. See Fig. S1, S2 and text for details.

| term                                       | RASSCF              |                   |       | MS-RASPT2           |                   |       |
|--------------------------------------------|---------------------|-------------------|-------|---------------------|-------------------|-------|
|                                            | $d_{\text{Eu-F},e}$ | $\omega_{a_{1g}}$ | $T_e$ | $d_{\text{Eu-F},e}$ | $\omega_{a_{1g}}$ | $T_e$ |
| $\text{Eu}^{2+}$ -doped $\text{BaF}_2$     |                     |                   |       |                     |                   |       |
| $4f^7(^8F)$                                |                     |                   |       |                     |                   |       |
| $1^8 A_{1u}$                               | 2.621               | 311               | 0     | 2.558               | 320               | 0     |
| $4f^6(5d + ITE_{a_{1g}})^1$ excited states |                     |                   |       |                     |                   |       |
| $4f^6(^7F)5de_g^1$                         |                     |                   |       |                     |                   |       |
| Octets                                     |                     |                   |       |                     |                   |       |
| $1^8 T_{2g}$                               | 2.599               | 277               | 26522 | 2.533               | 327               | 29705 |
| $1^8 T_{1g}$                               | 2.601               | 276               | 27396 | 2.534               | 327               | 30323 |
| $1^8 E_g$                                  | 2.597               | 293               | 27101 | 2.535               | 324               | 30458 |
| $2^8 T_{1g}$                               | 2.601               | 276               | 28458 | 2.534               | 326               | 31578 |
| $2^8 T_{2g}$                               | 2.597               | 294               | 30334 | 2.532               | 327               | 32626 |
| Sextets                                    |                     |                   |       |                     |                   |       |
| $1^6 T_{1g}$                               | 2.601               | 275               | 32542 | 2.533               | 323               | 33714 |
| $1^6 T_{2g}$                               | 2.596               | 297               | 36528 | 2.529               | 325               | 36784 |
| $1^6 E_g$                                  | 2.595               | 307               | 37442 | 2.526               | 325               | 37547 |
| $2^6 T_{1g}$                               | 2.597               | 292               | 37819 | 2.530               | 325               | 37574 |
| $2^6 T_{2g}$                               | 2.595               | 309               | 40792 | 2.529               | 322               | 39610 |
| $4f^6(^7F)(5dt_{2g}^1 + ITE_{a_{1g}}^1)^a$ |                     |                   |       |                     |                   |       |
| Octets                                     |                     |                   |       |                     |                   |       |
| $3^8 T_{2g}$                               | 2.655               | 319               | 39787 | 2.591               | 317               | 44164 |
| $2^8 E_g$                                  | 2.655               | 319               | 39537 | 2.591               | 316               | 44166 |
| $3^8 T_{1g}$                               | 2.653               | 325               | 40503 | 2.588               | 317               | 44315 |
| $4^8 T_{1g}$                               | 2.655               | 319               | 42698 | 2.591               | 315               | 45569 |
| $3^8 E_g$                                  | 2.655               | 319               | 43245 | 2.591               | 316               | 47066 |
| $1^8 A_{2g}$                               | 2.656               | 318               | 43739 | 2.500               | 812               | 47092 |
| $4^8 T_{2g}$                               | 2.656               | 319               | 43772 | 2.599               | 416               | 47222 |
| $5^8 T_{1g}$                               | 2.656               | 318               | 44577 | 2.599               | 475               | 47679 |
| $1^8 A_{1g}$                               | 2.656               | 318               | 44577 | 2.591               | 315               | 47969 |
| $5^8 T_{2g}$                               | 2.530               | 467               | 49334 | 2.516               | 480               | 49419 |
| $2^8 A_{2g}$                               | 2.526               | 486               | 49362 | 2.540               | 455               | 49457 |
| $6^8 T_{1g}$                               | 2.552               | 345               | 49428 | 2.523               | 466               | 49529 |
| $4f^7$ excited states                      |                     |                   |       |                     |                   |       |
| $4f^7(^6P)$                                |                     |                   |       |                     |                   |       |
| $1^6 T_{1u}$                               | 2.620               | 310               | 33822 | 2.556               | 320               | 30960 |
| $4f^7(^6I)$                                |                     |                   |       |                     |                   |       |
| $1^6 T_{2u}$                               | 2.620               | 310               | 37264 | 2.555               | 321               | 34626 |
| $1^6 E_u$                                  | 2.620               | 310               | 37287 | 2.555               | 321               | 34834 |

|                                          |       |     |       |       |     |       |
|------------------------------------------|-------|-----|-------|-------|-----|-------|
| 2 ${}^6T_{2u}$                           | 2.620 | 310 | 37419 | 2.556 | 320 | 34956 |
| 1 ${}^6A_{2u}$                           | 2.620 | 310 | 37281 | 2.556 | 320 | 34960 |
| 1 ${}^6A_{1u}$                           | 2.621 | 310 | 37476 | 2.557 | 320 | 35019 |
| 2 ${}^6T_{1u}$                           | 2.621 | 310 | 37455 | 2.557 | 320 | 35027 |
| $4f^7({}^6D)$                            |       |     |       |       |     |       |
| 2 ${}^6E_u$                              | 2.620 | 310 | 41246 | 2.555 | 321 | 37609 |
| 3 ${}^6T_{2u}$                           | 2.620 | 310 | 41359 | 2.555 | 317 | 37723 |
| $4f^7({}^6G, {}^6F)$                     |       |     |       |       |     |       |
| 4 ${}^6T_{2u}$                           | 2.618 | 309 | 55213 | 2.553 | 353 | 49754 |
| 3 ${}^6E_u$                              | 2.619 | 310 | 55606 | 2.555 | 320 | 49781 |
| 3 ${}^6T_{1u}$                           | 2.618 | 309 | 55424 | 2.554 | 323 | 49939 |
| 2 ${}^6A_{2u}$                           | 2.619 | 310 | 55627 | 2.555 | 320 | 50251 |
| 2 ${}^6A_{1u}$                           | 2.621 | 310 | 56112 | 2.557 | 320 | 50311 |
| 5 ${}^6T_{2u}$                           | 2.620 | 310 | 55825 | 2.555 | 320 | 50644 |
| 4 ${}^6T_{1u}$                           | 2.622 | 310 | 56034 | 2.557 | 321 | 50741 |
| $4f^7({}^6H)$                            |       |     |       |       |     |       |
| 5 ${}^6T_{1u}$                           | 2.619 | 310 | 61316 | 2.554 | 322 | 55355 |
| 4 ${}^6E_u$                              | 2.619 | 310 | 61439 | 2.554 | 321 | 55415 |
| 6 ${}^6T_{1u}$                           | 2.620 | 310 | 61688 | 2.556 | 320 | 55635 |
| 6 ${}^6T_{2u}$                           | 2.620 | 310 | 61734 | 2.557 | 320 | 55787 |
| Eu <sup>3+</sup> -doped BaF <sub>2</sub> |       |     |       |       |     |       |
| $4f^6({}^7F)$ <sup>b</sup>               |       |     |       |       |     |       |
| 1 ${}^7A_{2g}$                           | 2.399 | 409 | 0     | 2.360 | 401 | 0     |
| 1 ${}^7T_{1g}$                           | 2.401 | 408 | 897   | 2.363 | 400 | 1128  |
| 1 ${}^7T_{2g}$                           | 2.402 | 406 | 1124  | 2.364 | 401 | 1210  |
| $4f^6({}^5D)$                            |       |     |       |       |     |       |
| 1 ${}^5E_g$                              | 2.400 | 410 | 23639 | 2.361 | 399 | 21897 |
| 1 ${}^5T_{2g}$                           | 2.400 | 410 | 23765 | 2.362 | 399 | 21993 |
| $4f^6({}^5L, {}^5G)$                     |       |     |       |       |     |       |
| 2 ${}^5E_g$                              | 2.399 | 408 | 27357 | 2.360 | 399 | 26329 |
| 1 ${}^5T_{1g}$                           | 2.399 | 410 | 27385 | 2.360 | 399 | 26411 |
| 1 ${}^5A_{1g}$                           | 2.399 | 410 | 27388 | 2.360 | 399 | 26620 |
| 2 ${}^5T_{2g}$                           | 2.401 | 408 | 27924 | 2.360 | 396 | 26662 |
| 2 ${}^5T_{1g}$                           | 2.401 | 409 | 27903 | 2.362 | 400 | 26986 |
| 3 ${}^5E_g$                              | 2.401 | 409 | 28047 | 2.362 | 400 | 27091 |
| 3 ${}^5T_{2g}$                           | 2.401 | 407 | 28047 | 2.365 | 400 | 27392 |
| 2 ${}^5A_{1g}$                           | 2.402 | 406 | 28840 | 2.364 | 400 | 27409 |
| 3 ${}^5T_{1g}$                           | 2.401 | 409 | 28671 | 2.362 | 399 | 27532 |
| 4 ${}^5E_g$                              | 2.401 | 409 | 28527 | 2.363 | 401 | 27636 |
| 4 ${}^5T_{2g}$                           | 2.401 | 410 | 28409 | 2.364 | 404 | 27664 |

<sup>a</sup> Mixings and avoided crossings between states of the  $4f^6({}^7F)5dt_{2g}^1$  and  $4f^6({}^7F)ITE_{a_{1g}}^1$  configurations make most energy curves strongly anharmonic. The shape of the energy curves can be seen in Fig. S1. A value of  $d_{Eu-F,e}$  for states of the  $4f^6({}^7F)5dt_{2g}^1$  configuration of about 2.591 Å can be deduced from states in the  ${}^8E_g$  and  ${}^8A_{1g}$  symmetry blocks where the  $4f^6({}^7F) \times ITE_{a_{1g}}$  coupling is absent.

<sup>b</sup> The energy difference between the Eu<sup>3+</sup>  $4f^6 - 1{}^7A_{2g}$  and the Eu<sup>2+</sup>  $4f^7 - 1{}^8A_{1u}$  minima at MS-RASPT2 level is 17463 cm<sup>-1</sup>.

TABLE S4: Spectroscopic constants of the ground and excited states of  $\text{Eu}^{2+}$  and  $\text{Eu}^{3+}$  -doped CaS octahedral defects calculated using the relativistic spin-free second order Douglas-Kroll-Hess Hamiltonian with AIMP CaS embedding. The embedded cluster RASSCF results include basic bonding interactions and  $4f$ -shell radial correlation; the MS-RASPT2 ones include also dynamic correlation of 99 or 98 valence electrons in the Eu  $5s, 5p$ , S  $3s, 3p$ , Ca  $3p$  closed shells and Eu  $4f, 5d, 6s$  open shells. Eu-S bond distances ( $d_{\text{Eu-S},e}$  in Å),  $\text{EuS}_6$  breathing mode harmonic vibrational frequencies ( $\omega_{a_{1g}}$  in  $\text{cm}^{-1}$ ), and minimum-to-minimum energy differences ( $T_e$  in  $\text{cm}^{-1}$ ) are given. See Fig. S1, S2 and text for details.

| term                              | RASSCF              |                   |       | MS-RASPT2           |                   |       |
|-----------------------------------|---------------------|-------------------|-------|---------------------|-------------------|-------|
|                                   | $d_{\text{Eu-S},e}$ | $\omega_{a_{1g}}$ | $T_e$ | $d_{\text{Eu-S},e}$ | $\omega_{a_{1g}}$ | $T_e$ |
| $\text{Eu}^{2+}$ -doped CaS       |                     |                   |       |                     |                   |       |
| $4f^7(^8F)$                       |                     |                   |       |                     |                   |       |
| $1^8A_{1u}$                       | 2.911               | 305               | 0     | 2.876               | 284               | 0     |
| $4f^6(^7F)5dt_{2g}^1$             |                     |                   |       |                     |                   |       |
| Octets                            |                     |                   |       |                     |                   |       |
| $1^8E_g$                          | 2.892               | 303               | 20437 | 2.849               | 292               | 19952 |
| $1^8T_{2g}$                       | 2.892               | 303               | 20504 | 2.848               | 279               | 20278 |
| $1^8T_{1g}$                       | 2.893               | 303               | 20938 | 2.847               | 276               | 20492 |
| $2^8T_{1g}$                       | 2.891               | 303               | 21914 | 2.848               | 282               | 21014 |
| $2^8E_g$                          | 2.890               | 302               | 22710 | 2.847               | 283               | 21603 |
| $1^8A_{2g}$                       | 2.890               | 302               | 23435 | 2.846               | 281               | 22004 |
| $2^8T_{2g}$                       | 2.890               | 303               | 23428 | 2.847               | 280               | 22664 |
| $1^8A_{1g}$                       | 2.890               | 302               | 24309 | 2.846               | 281               | 22750 |
| $3^8T_{1g}$                       | 2.890               | 303               | 24324 | 2.847               | 281               | 23292 |
| Sextets                           |                     |                   |       |                     |                   |       |
| $1^6T_{1g}$                       | 2.890               | 303               | 25290 | 2.849               | 283               | 25656 |
| $2^6T_{1g}$                       | 2.888               | 302               | 29115 | 2.845               | 284               | 28318 |
| $1^6E_g$                          | 2.888               | 302               | 29049 | 2.845               | 284               | 28363 |
| $1^6T_{2g}$                       | 2.887               | 302               | 29211 | 2.845               | 284               | 28543 |
| $1^6A_{2g}$                       | 2.885               | 302               | 31345 | 2.843               | 284               | 29071 |
| $2^6T_{2g}$                       | 2.885               | 302               | 31799 | 2.844               | 284               | 29805 |
| $2^6E_g$                          | 2.884               | 301               | 32148 | 2.842               | 284               | 30267 |
| $3^6T_{1g}$                       | 2.885               | 301               | 32565 | 2.843               | 283               | 30551 |
| $1^6A_{1g}$                       | 2.883               | 301               | 33701 | 2.841               | 284               | 31007 |
| $4f^6(^7F)(5de_g^1 + 6sa_{1g}^1)$ |                     |                   |       |                     |                   |       |
| Octets                            |                     |                   |       |                     |                   |       |
| $3^8T_{2g}$                       | 2.925               | 303               | 40556 | 2.883               | 276               | 41139 |
| $4^8T_{1g}$                       | 2.924               | 302               | 42007 | 2.881               | 275               | 42067 |
| $3^8E_g$                          | 2.924               | 302               | 41934 | 2.878               | 277               | 42955 |
| $5^8T_{1g}$                       | 2.924               | 302               | 42930 | 2.881               | 275               | 43750 |
| $4^8T_{2g}$                       | 2.923               | 301               | 44113 | 2.881               | 274               | 43933 |
| $6^8T_{1g}$                       | 2.947               | 303               | 56762 | 2.901               | 274               | 50986 |
| $5^8T_{2g}$                       | 2.947               | 303               | 57017 | 2.901               | 275               | 51380 |
| $2^8A_{2g}$                       | 2.947               | 304               | 57185 | 2.901               | 228               | 51621 |
| Sextets                           |                     |                   |       |                     |                   |       |
| $3^6T_{2g}$                       | 2.891               | 303               | 45053 | 2.849               | 281               | 45389 |
| $4^6T_{1g}$                       | 2.905               | 292               | 45346 | 2.850               | 453               | 45722 |
| $3^6E_g$                          | 2.891               | 302               | 45660 | 2.849               | 281               | 45741 |
| $5^6T_{1g}$                       | 2.891               | 306               | 45779 | 2.850               | 419               | 45904 |
| $4^6T_{2g}$                       | 2.895               | 298               | 46171 | 2.851               | 282               | 46328 |
| $2^6A_{1g}$                       | 2.890               | 302               | 47372 | 2.848               | 280               | 46790 |
| $6^6T_{1g}$                       | 2.891               | 303               | 48057 | 2.867               | 289               | 48651 |

|                 |       |     |       |       |     |       |
|-----------------|-------|-----|-------|-------|-----|-------|
| 5 ${}^6T_{2g}$  | 2.891 | 303 | 48057 | 2.854 | 273 | 49773 |
| 2 ${}^6A_{2g}$  | 2.890 | 303 | 49514 | 2.849 | 279 | 49881 |
| 7 ${}^6T_{1g}$  | 2.890 | 303 | 48286 | 2.855 | 252 | 49936 |
| 3 ${}^6A_{1g}$  | 2.890 | 303 | 48523 | 2.849 | 279 | 50183 |
| 4 ${}^6E_g$     | 2.891 | 303 | 48285 | 2.852 | 277 | 50185 |
| 6 ${}^6T_{2g}$  | 2.890 | 303 | 48733 | 2.850 | 335 | 50219 |
| 8 ${}^6T_{1g}$  | 2.890 | 302 | 48651 | 2.857 | 286 | 50291 |
| 7 ${}^6T_{2g}$  | 2.890 | 303 | 48901 | 2.850 | 288 | 50447 |
| 9 ${}^6T_{1g}$  | 2.897 | 293 | 48941 | 2.851 | 265 | 50504 |
| 5 ${}^6E_g$     | 2.890 | 303 | 48901 | 2.850 | 281 | 50535 |
| 10 ${}^6T_{1g}$ | 2.895 | 293 | 49536 | 2.850 | 285 | 50581 |
| 4 ${}^6A_{1g}$  | 2.891 | 303 | 49656 | 2.849 | 279 | 50754 |
| 8 ${}^6T_{2g}$  | 2.893 | 298 | 49367 | 2.849 | 271 | 50829 |
| 11 ${}^6T_{1g}$ | 2.890 | 304 | 49689 | 2.848 | 235 | 50994 |
| 9 ${}^6T_{2g}$  | 2.891 | 299 | 49831 | 2.849 | 300 | 51024 |
| 6 ${}^6E_g$     | 2.890 | 298 | 49883 | 2.849 | 286 | 51095 |
| 10 ${}^6T_{2g}$ | 2.891 | 305 | 49899 | 2.849 | 282 | 51112 |
| 11 ${}^6T_{2g}$ | 2.890 | 300 | 50515 | 2.849 | 268 | 51280 |
| 3 ${}^6A_{2g}$  | 2.890 | 302 | 49842 | 2.849 | 280 | 51311 |
| 7 ${}^6E_g$     | 2.893 | 303 | 50032 | 2.853 | 264 | 51366 |
| 12 ${}^6T_{2g}$ | 2.891 | 303 | 50685 | 2.848 | 277 | 51460 |
| 12 ${}^6T_{1g}$ | 2.895 | 304 | 49944 | 2.850 | 289 | 51473 |
| 8 ${}^6E_g$     | 2.891 | 299 | 51194 | 2.849 | 279 | 51604 |
| 13 ${}^6T_{2g}$ | 2.892 | 297 | 51111 | 2.849 | 272 | 51886 |
| 13 ${}^6T_{1g}$ | 2.890 | 303 | 50558 | 2.849 | 279 | 51925 |
| 14 ${}^6T_{2g}$ | 2.890 | 304 | 51165 | 2.853 | 265 | 52342 |
| 14 ${}^6T_{1g}$ | 2.890 | 302 | 51147 | 2.853 | 273 | 52370 |
| 5 ${}^6A_{1g}$  | 2.890 | 302 | 51114 | 2.848 | 280 | 52373 |
| 15 ${}^6T_{1g}$ | 2.892 | 303 | 52685 | 2.849 | 266 | 52435 |
| 4 ${}^6A_{2g}$  | 2.890 | 302 | 51129 | 2.848 | 280 | 52482 |
| 9 ${}^6E_g$     | 2.891 | 300 | 51865 | 2.857 | 261 | 52525 |
| 15 ${}^6T_{2g}$ | 2.893 | 302 | 51787 | 2.852 | 243 | 52581 |
| 16 ${}^6T_{2g}$ | 2.895 | 307 | 52917 | 2.851 | 293 | 52713 |
| 16 ${}^6T_{1g}$ | 2.901 | 296 | 53231 | 2.861 | 301 | 52753 |
| 10 ${}^6E_g$    | 2.900 | 294 | 53098 | 2.860 | 306 | 52778 |
| 17 ${}^6T_{2g}$ | 2.894 | 298 | 53638 | 2.865 | 249 | 53831 |
| 11 ${}^6E_g$    | 2.895 | 305 | 54308 | 2.849 | 276 | 54406 |
| 17 ${}^6T_{1g}$ | 2.891 | 303 | 54278 | 2.848 | 282 | 54553 |
| 6 ${}^6A_{1g}$  | 2.890 | 303 | 54514 | 2.849 | 279 | 54802 |
| 18 ${}^6T_{2g}$ | 2.891 | 302 | 54677 | 2.858 | 270 | 54820 |
| 5 ${}^6A_{2g}$  | 2.890 | 302 | 54426 | 2.849 | 278 | 54885 |
| 19 ${}^6T_{2g}$ | 2.902 | 221 | 55628 | 2.848 | 281 | 55061 |
| 18 ${}^6T_{1g}$ | 2.891 | 303 | 55098 | 2.849 | 265 | 55216 |
| 12 ${}^6E_g$    | 2.890 | 302 | 55202 | 2.848 | 275 | 55332 |
| 19 ${}^6T_{1g}$ | 2.891 | 303 | 55737 | 2.848 | 282 | 55441 |
| 20 ${}^6T_{2g}$ | 2.900 | 378 | 55967 | 2.848 | 236 | 55694 |
| 13 ${}^6E_g$    | 2.893 | 304 | 56276 | 2.848 | 262 | 55792 |
| 21 ${}^6T_{2g}$ | 2.891 | 307 | 56681 | 2.846 | 309 | 56063 |
| 20 ${}^6T_{1g}$ | 2.891 | 303 | 56887 | 2.848 | 263 | 56265 |
| 6 ${}^6A_{2g}$  | 2.890 | 302 | 56548 | 2.848 | 282 | 56266 |

$4f^7$  excited states

$4f^7({}^6P)$

|                |       |     |       |       |     |       |
|----------------|-------|-----|-------|-------|-----|-------|
| 1 ${}^6T_{1u}$ | 2.909 | 304 | 33449 | 2.870 | 280 | 30009 |
|----------------|-------|-----|-------|-------|-----|-------|

$4f^7({}^6I)$

|                |       |     |       |       |     |       |
|----------------|-------|-----|-------|-------|-----|-------|
| 1 ${}^6T_{2u}$ | 2.909 | 304 | 36913 | 2.869 | 281 | 33773 |
| 1 ${}^6A_{1u}$ | 2.909 | 304 | 36931 | 2.870 | 281 | 33887 |
| 2 ${}^6T_{1u}$ | 2.909 | 304 | 36938 | 2.869 | 280 | 33914 |

|                             |       |     |       |       |     |       |
|-----------------------------|-------|-----|-------|-------|-----|-------|
| $2\ ^6T_{2u}$               | 2.909 | 304 | 36944 | 2.869 | 280 | 33957 |
| $1\ ^6E_u$                  | 2.909 | 304 | 36957 | 2.870 | 280 | 33957 |
| $1\ ^6A_{2u}$               | 2.909 | 304 | 36922 | 2.870 | 281 | 34063 |
| $4f^7(^6D)$                 |       |     |       |       |     |       |
| $3\ ^6T_{2u}$               | 2.909 | 304 | 40805 | 2.869 | 281 | 36463 |
| $2\ ^6E_u$                  | 2.908 | 304 | 40838 | 2.869 | 280 | 36637 |
| Eu <sup>3+</sup> -doped CaS |       |     |       |       |     |       |
| $4f^6(^7F)$ <sup>a</sup>    |       |     |       |       |     |       |
| $1\ ^7T_{1g}$               | 2.763 | 320 | 0     | 2.728 | 308 | 0     |
| $1\ ^7T_{2g}$               | 2.764 | 321 | 563   | 2.729 | 308 | 472   |
| $1\ ^7A_{2g}$               | 2.764 | 320 | 412   | 2.731 | 308 | 793   |
| $4f^6(^5D)$                 |       |     |       |       |     |       |
| $1\ ^5T_{2g}$               | 2.763 | 320 | 23001 | 2.727 | 307 | 21050 |
| $1\ ^5E_g$                  | 2.763 | 320 | 23064 | 2.727 | 307 | 21176 |
| $4f^6(^5L, ^5G)$            |       |     |       |       |     |       |
| $1\ ^5T_{1g}$               | 2.763 | 320 | 26932 | 2.726 | 307 | 25573 |
| $2\ ^5E_g$                  | 2.763 | 320 | 26867 | 2.726 | 307 | 25617 |
| $1\ ^5A_{1g}$               | 2.763 | 320 | 27262 | 2.726 | 307 | 25619 |
| $2\ ^5T_{2g}$               | 2.763 | 320 | 26830 | 2.727 | 307 | 25994 |
| $3\ ^5T_{2g}$               | 2.763 | 320 | 27068 | 2.725 | 307 | 26111 |
| $3\ ^5E_g$                  | 2.763 | 320 | 27251 | 2.726 | 307 | 26238 |
| $4\ ^5T_{2g}$               | 2.763 | 320 | 27871 | 2.727 | 308 | 26253 |
| $2\ ^5T_{1g}$               | 2.763 | 320 | 27246 | 2.727 | 307 | 26322 |
| $3\ ^5T_{1g}$               | 2.763 | 320 | 27760 | 2.727 | 308 | 26552 |
| $4\ ^5E_g$                  | 2.763 | 320 | 27731 | 2.727 | 307 | 26621 |
| $2\ ^5A_{1g}$               | 2.763 | 320 | 27651 | 2.727 | 307 | 26751 |

<sup>a</sup> The energy difference between the Eu<sup>3+</sup>  $4f^6 - 1^7T_{1g}$  and the Eu<sup>2+</sup>  $4f^7 - 1^8A_{1u}$  at MS-RASPT2 level is 25681 cm<sup>-1</sup>.

TABLE S5: Spectroscopic constants of the ground and excited states of  $\text{Eu}^{2+}$  and  $\text{Eu}^{3+}$  -doped SrS octahedral defects calculated using the relativistic spin-free second order Douglas-Kroll-Hess Hamiltonian with AIMP SrS embedding. The embedded cluster RASSCF results include basic bonding interactions and  $4f$ -shell radial correlation; the MS-RASPT2 ones include also dynamic correlation of 99 or 98 valence electrons in the Eu  $5s, 5p$ , S  $3s, 3p$ , Sr  $4p$  closed shells and Eu  $4f, 5d, 6s$  open shells. Eu-S bond distances ( $d_{\text{Eu-S},e}$  in Å),  $\text{EuS}_6$  breathing mode harmonic vibrational frequencies ( $\omega_{a_{1g}}$  in  $\text{cm}^{-1}$ ), and minimum-to-minimum energy differences ( $T_e$  in  $\text{cm}^{-1}$ ) are given. See Fig. S1, S2 and text for details.

| term                            | RASSCF              |                   |       | MS-RASPT2           |                   |       |
|---------------------------------|---------------------|-------------------|-------|---------------------|-------------------|-------|
|                                 | $d_{\text{Eu-S},e}$ | $\omega_{a_{1g}}$ | $T_e$ | $d_{\text{Eu-S},e}$ | $\omega_{a_{1g}}$ | $T_e$ |
| Eu <sup>2+</sup> -doped SrS     |                     |                   |       |                     |                   |       |
| $4f^7(^8S)$                     |                     |                   |       |                     |                   |       |
| $1^8A_{1u}$                     | 2.984               | 282               | 0     | 2.974               | 267               | 0     |
| $4f^6(5d+6s)^1$ excited states  |                     |                   |       |                     |                   |       |
| $4f^6(^7F)5dt_{2g}^1$           |                     |                   |       |                     |                   |       |
| Octets                          |                     |                   |       |                     |                   |       |
| $1^8T_{2g}$                     | 2.963               | 280               | 21571 | 2.943               | 264               | 21873 |
| $1^8E_g$                        | 2.963               | 280               | 21479 | 2.944               | 263               | 21960 |
| $1^8T_{1g}$                     | 2.963               | 280               | 21975 | 2.943               | 263               | 22092 |
| $2^8T_{1g}$                     | 2.963               | 280               | 22987 | 2.943               | 264               | 22596 |
| $2^8E_g$                        | 2.962               | 279               | 23840 | 2.942               | 264               | 23747 |
| $1^8A_{2g}$                     | 2.961               | 279               | 24611 | 2.941               | 264               | 24194 |
| $2^8T_{2g}$                     | 2.962               | 279               | 24568 | 2.942               | 264               | 24309 |
| $1^8A_{1g}$                     | 2.961               | 279               | 25482 | 2.941               | 264               | 24922 |
| $3^8T_{1g}$                     | 2.961               | 279               | 25493 | 2.941               | 264               | 24934 |
| Sextets                         |                     |                   |       |                     |                   |       |
| $1^6T_{1g}$                     | 2.962               | 279               | 26429 | 2.945               | 264               | 27174 |
| $2^6T_{1g}$                     | 2.958               | 279               | 30382 | 2.940               | 264               | 30034 |
| $1^6E_g$                        | 2.958               | 279               | 30329 | 2.940               | 265               | 30073 |
| $1^6T_{2g}$                     | 2.958               | 279               | 30514 | 2.940               | 264               | 30279 |
| $1^6A_{2g}$                     | 2.955               | 278               | 32748 | 2.938               | 264               | 30893 |
| $2^6T_{2g}$                     | 2.955               | 278               | 33191 | 2.938               | 264               | 31633 |
| $2^6E_g$                        | 2.955               | 278               | 33564 | 2.936               | 264               | 32153 |
| $3^6T_{1g}$                     | 2.956               | 278               | 33949 | 2.937               | 263               | 32409 |
| $1^6A_{1g}$                     | 2.954               | 277               | 35165 | 2.935               | 264               | 32927 |
| $4f^6(^7F)(5de_g^1+6sa_{1g}^1)$ |                     |                   |       |                     |                   |       |
| Octets                          |                     |                   |       |                     |                   |       |
| $3^8T_{2g}$                     | 3.000               | 277               | 39729 | 2.984               | 263               | 40486 |
| $4^8T_{1g}$                     | 2.998               | 278               | 41229 | 2.982               | 263               | 41435 |
| $3^8E_g$                        | 2.999               | 278               | 41114 | 2.981               | 262               | 42198 |
| $5^8T_{1g}$                     | 2.998               | 278               | 42128 | 2.982               | 263               | 43095 |
| $4^8T_{2g}$                     | 2.998               | 277               | 43320 | 2.982               | 262               | 43333 |
| $6^8T_{1g}$                     | 3.022               | 282               | 55155 | 2.999               | 261               | 49671 |
| $5^8T_{2g}$                     | 3.022               | 283               | 55385 | 3.000               | 264               | 50028 |
| $2^8A_{2g}$                     | 3.023               | 283               | 55559 | 3.000               | 265               | 50087 |
| Sextets                         |                     |                   |       |                     |                   |       |
| $4^6T_{1g}$                     | 2.985               | 274               | 45413 | 2.973               | 258               | 46244 |
| $3^6T_{2g}$                     | 2.962               | 279               | 46169 | 2.945               | 263               | 46885 |
| $3^6E_g$                        | 2.962               | 278               | 46753 | 2.945               | 266               | 47237 |
| $5^6T_{1g}$                     | 2.963               | 278               | 46857 | 2.946               | 263               | 47409 |
| $4^6T_{2g}$                     | 2.972               | 272               | 46891 | 2.953               | 250               | 47576 |

|                 |       |     |       |       |      |       |
|-----------------|-------|-----|-------|-------|------|-------|
| 2 ${}^6A_{1g}$  | 2.961 | 279 | 48528 | 2.943 | 264  | 48382 |
| 6 ${}^6T_{1g}$  | 2.963 | 280 | 49135 | 2.951 | 379  | 49378 |
| 7 ${}^6T_{1g}$  | 2.962 | 277 | 49407 | 2.971 | 266  | 50347 |
| 5 ${}^6T_{2g}$  | 2.962 | 280 | 49137 | 2.957 | 286  | 50372 |
| 4 ${}^6E_g$     | 2.962 | 279 | 49401 | 2.978 | 254  | 50945 |
| 2 ${}^6A_{2g}$  | 2.962 | 279 | 50632 | 2.945 | 264  | 51398 |
| 6 ${}^6T_{2g}$  | 2.961 | 278 | 49888 | 2.946 | 268  | 51558 |
| 3 ${}^6A_{1g}$  | 2.962 | 279 | 49644 | 2.945 | 264  | 51680 |
| 8 ${}^6T_{1g}$  | 2.969 | 274 | 49666 | 2.941 | 267  | 51701 |
| 7 ${}^6T_{2g}$  | 2.961 | 273 | 50068 | 2.946 | 256  | 51897 |
| 9 ${}^6T_{1g}$  | 2.961 | 283 | 49798 | 2.945 | 270  | 51954 |
| 5 ${}^6E_g$     | 2.961 | 279 | 50068 | 2.945 | 265  | 52016 |
| 8 ${}^6T_{2g}$  | 2.969 | 286 | 50179 | 2.954 | 242  | 52047 |
| 10 ${}^6T_{1g}$ | 2.975 | 285 | 50124 | 2.945 | 264  | 52059 |
| 9 ${}^6T_{2g}$  | 2.963 | 280 | 50866 | 2.952 | 295  | 52226 |
| 4 ${}^6A_{1g}$  | 2.962 | 279 | 50773 | 2.945 | 264  | 52266 |
| 6 ${}^6E_g$     | 2.973 | 267 | 50724 | 2.950 | 306  | 52390 |
| 11 ${}^6T_{1g}$ | 2.961 | 278 | 50851 | 2.941 | 261  | 52479 |
| 10 ${}^6T_{2g}$ | 2.961 | 280 | 51017 | 2.945 | 257  | 52629 |
| 7 ${}^6E_g$     | 2.961 | 281 | 51071 | 2.944 | 266  | 52665 |
| 11 ${}^6T_{2g}$ | 2.966 | 273 | 51524 | 2.942 | 266  | 52700 |
| 3 ${}^6A_{2g}$  | 2.962 | 279 | 50983 | 2.944 | 263  | 52853 |
| 12 ${}^6T_{1g}$ | 2.963 | 283 | 50885 | 2.962 | 229  | 52990 |
| 12 ${}^6T_{2g}$ | 2.962 | 280 | 51777 | 2.945 | 262  | 53014 |
| 8 ${}^6E_g$     | 2.966 | 277 | 52157 | 2.942 | 265  | 53135 |
| 13 ${}^6T_{1g}$ | 2.961 | 279 | 51710 | 2.954 | 208  | 53381 |
| 13 ${}^6T_{2g}$ | 2.966 | 278 | 52033 | 2.944 | 262  | 53418 |
| 14 ${}^6T_{1g}$ | 2.961 | 279 | 52315 | 2.946 | 255  | 53440 |
| 9 ${}^6E_g$     | 2.964 | 279 | 52876 | 2.946 | 276  | 53528 |
| 14 ${}^6T_{2g}$ | 2.961 | 279 | 52321 | 2.958 | 239  | 53731 |
| 15 ${}^6T_{1g}$ | 2.967 | 270 | 53682 | 2.967 | 253  | 53792 |
| 4 ${}^6A_{2g}$  | 2.961 | 279 | 52290 | 2.989 | 286  | 53820 |
| 15 ${}^6T_{2g}$ | 2.963 | 280 | 52795 | 2.962 | 264  | 53826 |
| 5 ${}^6A_{1g}$  | 2.961 | 279 | 52286 | 2.942 | 264  | 53991 |
| 16 ${}^6T_{1g}$ | 2.966 | 292 | 53777 | 2.959 | 238  | 54072 |
| 10 ${}^6E_g$    | 2.967 | 286 | 53723 | 2.943 | 268  | 54102 |
| 16 ${}^6T_{2g}$ | 2.963 | 282 | 53832 | 2.959 | 241  | 54109 |
| 17 ${}^6T_{2g}$ | 2.972 | 271 | 54385 | 2.955 | 245  | 54366 |
| 17 ${}^6T_{1g}$ | 2.962 | 280 | 55351 | 2.992 | 368  | 54662 |
| 5 ${}^6A_{2g}$  | 2.962 | 279 | 55555 | 2.992 | 376  | 54687 |
| 18 ${}^6T_{2g}$ | 2.966 | 267 | 55752 | 2.988 | 348  | 54907 |
| 11 ${}^6E_g$    | 2.963 | 280 | 55266 | 2.943 | 264  | 55993 |
| 19 ${}^6T_{2g}$ | 2.969 | 298 | 55878 | 2.954 | 363  | 56141 |
| 18 ${}^6T_{1g}$ | 2.963 | 279 | 56159 | 2.952 | 470  | 56175 |
| 6 ${}^6A_{1g}$  | 2.962 | 279 | 55652 | 2.945 | 264  | 56331 |
| 6 ${}^6A_{2g}$  | 2.959 | 250 | 57701 | 2.958 | 373  | 56456 |
| 20 ${}^6T_{2g}$ | 2.961 | 274 | 56965 | 2.952 | 519  | 56530 |
| 19 ${}^6T_{1g}$ | 2.962 | 275 | 56801 | 2.950 | 354  | 56809 |
| 12 ${}^6E_g$    | 2.961 | 279 | 56370 | 2.943 | 263  | 56926 |
| 20 ${}^6T_{1g}$ | 2.959 | 246 | 57966 | 2.954 | 376  | 57039 |
| 21 ${}^6T_{2g}$ | 2.959 | 259 | 57774 | 2.952 | 436  | 57341 |
| 13 ${}^6E_g$    | 2.962 | 280 | 57289 | 2.943 | 263  | 57378 |
| 21 ${}^6T_{1g}$ | 3.000 | 684 | 58336 | 2.950 | 1149 | 57916 |
| 22 ${}^6T_{2g}$ | 3.000 | 624 | 58487 | 2.954 | 723  | 58008 |
| 7 ${}^6A_{2g}$  | 3.000 | 552 | 58587 | 2.951 | 919  | 58135 |

$4f^7$  excited states

$4f^7({}^6P)$

|                |       |     |       |       |     |       |
|----------------|-------|-----|-------|-------|-----|-------|
| 1 ${}^6T_{1u}$ | 2.982 | 281 | 33535 | 2.969 | 267 | 30266 |
|----------------|-------|-----|-------|-------|-----|-------|

|                             |       |     |       |       |     |       |
|-----------------------------|-------|-----|-------|-------|-----|-------|
| $4f^7(^6I)$                 |       |     |       |       |     |       |
| 1 $^6T_{2u}$                | 2.982 | 281 | 37010 | 2.968 | 265 | 34034 |
| 1 $^6A_{1u}$                | 2.982 | 281 | 37031 | 2.969 | 267 | 34135 |
| 2 $^6T_{1u}$                | 2.982 | 281 | 37036 | 2.969 | 265 | 34178 |
| 1 $^6E_u$                   | 2.982 | 281 | 37052 | 2.969 | 266 | 34215 |
| 2 $^6T_{2u}$                | 2.982 | 281 | 37040 | 2.969 | 264 | 34228 |
| 1 $^6A_{2u}$                | 2.982 | 281 | 37014 | 2.969 | 267 | 34308 |
| $4f^7(^6D)$                 |       |     |       |       |     |       |
| 3 $^6T_{2u}$                | 2.981 | 281 | 40916 | 2.968 | 265 | 36773 |
| 2 $^6E_u$                   | 2.981 | 281 | 40948 | 2.968 | 267 | 36908 |
| Eu <sup>3+</sup> -doped SrS |       |     |       |       |     |       |
| $4f^6(^7F)^a$               |       |     |       |       |     |       |
| 1 $^7T_{1g}$                | 2.812 | 300 | 0     | 2.799 | 286 | 0     |
| 1 $^7T_{2g}$                | 2.813 | 300 | 531   | 2.800 | 285 | 425   |
| 1 $^7A_{2g}$                | 2.813 | 300 | 366   | 2.801 | 295 | 654   |
| $4f^6(^5D)$                 |       |     |       |       |     |       |
| 1 $^5T_{2g}$                | 2.812 | 300 | 23014 | 2.797 | 285 | 21111 |
| 1 $^5E_g$                   | 2.812 | 300 | 23069 | 2.798 | 284 | 21228 |
| $4f^6(^5L, ^5G)$            |       |     |       |       |     |       |
| 1 $^5T_{1g}$                | 2.811 | 300 | 26960 | 2.797 | 285 | 25657 |
| 2 $^5E_g$                   | 2.811 | 300 | 26901 | 2.797 | 283 | 25702 |
| 1 $^5A_{1g}$                | 2.812 | 300 | 27254 | 2.797 | 285 | 25710 |
| 2 $^5T_{2g}$                | 2.811 | 299 | 26866 | 2.798 | 284 | 26033 |
| 3 $^5T_{2g}$                | 2.812 | 300 | 27084 | 2.797 | 285 | 26210 |
| 3 $^5E_g$                   | 2.812 | 300 | 27248 | 2.797 | 284 | 26320 |
| 4 $^5T_{2g}$                | 2.812 | 300 | 27873 | 2.797 | 285 | 26328 |
| 2 $^5T_{1g}$                | 2.812 | 300 | 27241 | 2.797 | 285 | 26385 |
| 3 $^5T_{1g}$                | 2.811 | 300 | 27780 | 2.798 | 284 | 26599 |
| 4 $^5E_g$                   | 2.812 | 300 | 27749 | 2.798 | 285 | 26665 |
| 2 $^5A_{1g}$                | 2.811 | 300 | 27675 | 2.798 | 284 | 26785 |

<sup>a</sup> The energy difference between the Eu<sup>3+</sup>  $4f^6 - 1^7T_{1g}$  and the Eu<sup>2+</sup>  $4f^7 - 1^8A_{1u}$  at MS-RASPT2 level is 19903 cm<sup>-1</sup>.



TABLE S6: Spectroscopic constants of the ground and excited states of  $\text{Eu}^{2+}$  and  $\text{Eu}^{3+}$  -doped BaS octahedral defects calculated using the relativistic spin-free second order Douglas-Kroll-Hess Hamiltonian with AIMP BaS embedding. The embedded cluster RASSCF results include basic bonding interactions and  $4f$ -shell radial correlation; the MS-RASPT2 ones include also dynamic correlation of 99 or 98 valence electrons in the Eu  $5s, 5p$ , S  $3s, 3p$ , Ba  $5p$  closed shells and Eu  $4f, 5d, 6s$  open shells. Eu-S bond distances ( $d_{\text{Eu-S},e}$  in Å),  $\text{EuS}_6$  breathing mode harmonic vibrational frequencies ( $\omega_{a_{1g}}$  in  $\text{cm}^{-1}$ ), and minimum-to-minimum energy differences ( $T_e$  in  $\text{cm}^{-1}$ ) are given. See Fig. S1, S2 and text for details.

| term                        | RASSCF              |                   |       | MS-RASPT2           |                   |       |
|-----------------------------|---------------------|-------------------|-------|---------------------|-------------------|-------|
|                             | $d_{\text{Eu-S},e}$ | $\omega_{a_{1g}}$ | $T_e$ | $d_{\text{Eu-S},e}$ | $\omega_{a_{1g}}$ | $T_e$ |
| $\text{Eu}^{2+}$ -doped BaS |                     |                   |       |                     |                   |       |
| $4f^7(^8S)$                 |                     |                   |       |                     |                   |       |
| $1^8A_{1u}$                 | 3.135               | 227               | 0     | 3.087               | 204               | 0     |
| $4f^65d^1$ excited states   |                     |                   |       |                     |                   |       |
| $4f^6(^7F)5dt_{2g}^1$       |                     |                   |       |                     |                   |       |
| Octets                      |                     |                   |       |                     |                   |       |
| $1^8T_{2g}$                 | 3.112               | 226               | 23409 | 3.034               | 196               | 22371 |
| $1^8T_{1g}$                 | 3.113               | 226               | 23722 | 3.033               | 195               | 22555 |
| $1^8E_g$                    | 3.112               | 226               | 23268 | 3.038               | 197               | 22742 |
| $2^8T_{1g}$                 | 3.112               | 226               | 24713 | 3.034               | 197               | 23036 |
| $2^8E_g$                    | 3.109               | 225               | 25617 | 3.034               | 196               | 24531 |
| $2^8T_{2g}$                 | 3.109               | 225               | 26344 | 3.030               | 194               | 24667 |
| $1^8A_{2g}$                 | 3.107               | 225               | 26440 | 3.032               | 196               | 25014 |
| $3^8T_{1g}$                 | 3.107               | 225               | 27273 | 3.030               | 195               | 25323 |
| $1^8A_{1g}$                 | 3.107               | 224               | 27275 | 3.032               | 196               | 25703 |
| Sextets                     |                     |                   |       |                     |                   |       |
| $1^6T_{1g}$                 | 3.109               | 225               | 28108 | 3.034               | 194               | 28268 |
| $2^6T_{1g}$                 | 3.104               | 223               | 32046 | 3.025               | 192               | 31068 |
| $1^6E_g$                    | 3.104               | 223               | 32006 | 3.025               | 191               | 31108 |
| $1^6T_{2g}$                 | 3.103               | 222               | 32239 | 3.024               | 192               | 31345 |
| $1^6A_{2g}$                 | 3.099               | 219               | 34467 | 3.022               | 191               | 31968 |
| $2^6T_{2g}$                 | 3.099               | 219               | 34883 | 3.021               | 191               | 32662 |
| $2^6E_g$                    | 3.099               | 219               | 35243 | 3.018               | 190               | 33167 |
| $3^6T_{1g}$                 | 3.100               | 218               | 35547 | 3.019               | 191               | 33410 |
| $1^6A_{1g}$                 | 3.096               | 220               | 36846 | 3.016               | 189               | 33907 |
| $4f^6(^7F)5de_g^1$          |                     |                   |       |                     |                   |       |
| Octets                      |                     |                   |       |                     |                   |       |
| $3^8T_{2g}$                 | 3.145               | 221               | 37477 | 3.056               | 162               | 37539 |
| $4^8T_{1g}$                 | 3.142               | 219               | 39025 | 3.051               | 163               | 38254 |
| $3^8E_g$                    | 3.143               | 219               | 38842 | 3.059               | 188               | 39554 |
| $5^8T_{1g}$                 | 3.142               | 218               | 39846 | 3.050               | 161               | 40091 |
| $4^8T_{2g}$                 | 3.141               | 217               | 41019 | 3.044               | 153               | 40265 |
| $4f^7$ excited states       |                     |                   |       |                     |                   |       |
| $4f^7(^6P)$                 |                     |                   |       |                     |                   |       |
| $1^6T_{1u}$                 | 3.134               | 227               | 33666 | 3.080               | 158               | 30453 |
| $4f^7(^6I)$                 |                     |                   |       |                     |                   |       |
| $1^6T_{2u}$                 | 3.134               | 227               | 37150 | 3.075               | 254               | 34195 |

|                             |       |     |       |       |     |       |
|-----------------------------|-------|-----|-------|-------|-----|-------|
| $2\ ^6T_{1u}$               | 3.134 | 227 | 37186 | 3.080 | 202 | 34350 |
| $1\ ^6A_{1u}$               | 3.134 | 227 | 37183 | 3.080 | 202 | 34353 |
| $1\ ^6E_u$                  | 3.134 | 227 | 37187 | 3.081 | 204 | 34416 |
| $2\ ^6T_{2u}$               | 3.134 | 227 | 37187 | 3.080 | 188 | 34422 |
| $1\ ^6A_{2u}$               | 3.134 | 227 | 37153 | 3.080 | 202 | 34517 |
| $4f^7(^6D)$                 |       |     |       |       |     |       |
| $3\ ^6T_{2u}$               | 3.133 | 227 | 41086 | 3.079 | 176 | 37006 |
| $2\ ^6E_u$                  | 3.133 | 227 | 41109 | 3.079 | 171 | 37138 |
| Eu <sup>3+</sup> -doped BaS |       |     |       |       |     |       |
| $4f^6(^7F)$ <sup>a</sup>    |       |     |       |       |     |       |
| $1\ ^7T_{1g}$               | 2.893 | 259 | 0     | 2.828 | 249 | 0     |
| $1\ ^7T_{2g}$               | 2.893 | 259 | 464   | 2.829 | 249 | 363   |
| $1\ ^7A_{2g}$               | 2.940 | 374 | -218  | 2.831 | 249 | 592   |
| $4f^6(^5D)$                 |       |     |       |       |     |       |
| $1\ ^5T_{2g}$               | 2.892 | 259 | 23028 | 2.826 | 249 | 21123 |
| $1\ ^5E_g$                  | 2.892 | 259 | 23064 | 2.827 | 249 | 21227 |
| $4f^6(^5L, ^5G)$            |       |     |       |       |     |       |
| $1\ ^5T_{1g}$               | 2.892 | 258 | 27001 | 2.826 | 249 | 25692 |
| $2\ ^5E_g$                  | 2.891 | 259 | 26955 | 2.826 | 248 | 25738 |
| $1\ ^5A_{1g}$               | 2.892 | 259 | 27220 | 2.826 | 248 | 25746 |
| $2\ ^5T_{2g}$               | 2.891 | 259 | 26924 | 2.827 | 248 | 26008 |
| $3\ ^5T_{2g}$               | 2.892 | 259 | 27098 | 2.826 | 249 | 26265 |
| $3\ ^5E_g$                  | 2.892 | 259 | 27223 | 2.826 | 248 | 26354 |
| $4\ ^5T_{2g}$               | 2.892 | 259 | 27859 | 2.826 | 248 | 26357 |
| $2\ ^5T_{1g}$               | 2.892 | 259 | 27214 | 2.826 | 248 | 26393 |
| $3\ ^5T_{1g}$               | 2.892 | 259 | 27806 | 2.827 | 249 | 26589 |
| $4\ ^5E_g$                  | 2.892 | 259 | 27770 | 2.827 | 248 | 26647 |
| $2\ ^5A_{1g}$               | 2.892 | 259 | 27708 | 2.827 | 248 | 26753 |

<sup>a</sup> The energy difference between the Eu<sup>3+</sup>  $4f^6 - 1^7T_{1g}$  and the Eu<sup>2+</sup>  $4f^7 - 1^8A_{1u}$  at MS-RASPT2 level is 24089 cm<sup>-1</sup>.

TABLE S7.  $O_h$   $\Gamma_{6u}$ ,  $\Gamma_{7u}$ , and  $\Gamma_{8u}$  states derived from the lowest energy multiplets of the  $4f^7$  configuration.

|               | 2J |   |   |   |   |    |    |    | $\Gamma_{6u}$ | $\Gamma_{7u}$ | $\Gamma_{8u}$ |    |
|---------------|----|---|---|---|---|----|----|----|---------------|---------------|---------------|----|
| $4f^7(^8S_J)$ |    |   |   | 7 |   |    |    |    | 1             | 1             | 1             |    |
| $4f^7(^6P_J)$ |    | 3 | 5 | 7 |   |    |    |    | 1             | 2             | 3             |    |
| $4f^7(^6D_J)$ | 1  | 3 | 5 | 7 | 9 |    |    |    | 3             | 2             | 5             |    |
| $4f^7(^6F_J)$ | 1  | 3 | 5 | 7 | 9 | 11 |    |    | 4             | 3             | 7             |    |
| $4f^7(^6G_J)$ |    | 3 | 5 | 7 | 9 | 11 | 13 |    | 4             | 5             | 9             |    |
| $4f^7(^6H_J)$ |    |   | 5 | 7 | 9 | 11 | 13 | 15 |               | 5             | 6             | 11 |
| $4f^7(^6I_J)$ |    |   |   | 7 | 9 | 11 | 13 | 15 | 17            | 7             | 6             | 13 |

TABLE S8.  $O_h$   $\Gamma_{6g}$ ,  $\Gamma_{7g}$ , and  $\Gamma_{8g}$  states derived from the  ${}^7F_J \times ({}^2E_g + {}^2T_{2g} + {}^2A_{1g})$  coupling.

|                                   | J | $\Gamma_{6g}$ | Total         |               | High spin     |               |               | Low spin      |               |               |
|-----------------------------------|---|---------------|---------------|---------------|---------------|---------------|---------------|---------------|---------------|---------------|
|                                   |   |               | $\Gamma_{7g}$ | $\Gamma_{8g}$ | $\Gamma_{6g}$ | $\Gamma_{7g}$ | $\Gamma_{8g}$ | $\Gamma_{6g}$ | $\Gamma_{7g}$ | $\Gamma_{8g}$ |
| $4f^6({}^7F_J) \times {}^2E_g$    | 0 | 0             | 0             | 1             | 0             | 0             | 1             | 0             | 0             | 0             |
|                                   | 1 | 1             | 1             | 2             | 1             | 1             | 1             | 0             | 0             | 1             |
|                                   | 2 | 2             | 2             | 3             | 1             | 1             | 2             | 1             | 1             | 1             |
|                                   | 3 | 2             | 2             | 5             | 1             | 1             | 3             | 1             | 1             | 2             |
|                                   | 4 | 3             | 3             | 6             | 2             | 2             | 3             | 1             | 1             | 3             |
|                                   | 5 | 4             | 4             | 7             | 2             | 2             | 4             | 2             | 2             | 3             |
|                                   | 6 | 4             | 4             | 9             | 2             | 2             | 5             | 2             | 2             | 4             |
| ${}^7F_{0,1,2,3,4,5,6}$           |   | 16            | 16            | 33            | 9             | 9             | 19            | 7             | 7             | 14            |
| $4f^6({}^7F_J) \times {}^2T_{2g}$ | 0 | 0             | 1             | 1             | 0             | 1             | 1             | 0             | 0             | 0             |
|                                   | 1 | 1             | 2             | 3             | 1             | 1             | 2             | 0             | 1             | 1             |
|                                   | 2 | 3             | 2             | 5             | 2             | 1             | 3             | 1             | 1             | 2             |
|                                   | 3 | 4             | 3             | 7             | 2             | 2             | 4             | 2             | 1             | 3             |
|                                   | 4 | 4             | 5             | 9             | 2             | 3             | 5             | 2             | 2             | 4             |
|                                   | 5 | 5             | 6             | 11            | 3             | 3             | 6             | 2             | 3             | 5             |
|                                   | 6 | 7             | 6             | 13            | 4             | 3             | 7             | 3             | 3             | 6             |
| ${}^7F_{0,1,2,3,4,5,6}$           |   | 24            | 25            | 49            | 14            | 14            | 28            | 10            | 11            | 21            |
| $4f^6({}^7F_J) \times {}^2A_{1g}$ | 0 | 1             | 0             | 0             | 1             | 0             | 0             | 0             | 0             | 0             |
|                                   | 1 | 1             | 0             | 1             | 0             | 0             | 1             | 1             | 0             | 0             |
|                                   | 2 | 0             | 1             | 2             | 0             | 1             | 1             | 0             | 0             | 1             |
|                                   | 3 | 1             | 2             | 2             | 1             | 1             | 1             | 0             | 1             | 1             |
|                                   | 4 | 2             | 1             | 3             | 1             | 0             | 2             | 1             | 1             | 1             |
|                                   | 5 | 2             | 1             | 4             | 1             | 1             | 2             | 1             | 0             | 2             |
|                                   | 6 | 2             | 3             | 4             | 1             | 2             | 2             | 1             | 1             | 2             |
| ${}^7F_{0,1,2,3,4,5,6}$           |   | 9             | 8             | 16            | 5             | 5             | 9             | 4             | 3             | 7             |

TABLE S9: Spectroscopic constants and analyses of the spin-orbit wave functions of the ground and lowest lying excited states of  $\text{Eu}^{2+}$  and  $\text{Eu}^{3+}$  -doped  $\text{CaF}_2$  cubic defects.  $\text{Eu-F}$  bond distances ( $d_{\text{Eu-F},e}$  in Å),  $\text{EuF}_8$  breathing mode harmonic vibrational frequencies ( $\omega_{a_{1g}}$  in  $\text{cm}^{-1}$ ), minimum-to-minimum energy differences ( $T_e$  in  $\text{cm}^{-1}$ ), and relative absorption and emission oscillator strengths ( $f_i^{abs}/f_{ref}$  and  $f_i^{emi}/f_{ref}$ ) are given. Calculated radiative emission lifetime for the  $4f^6(^7F_J)5de_g^1 - 1\Gamma_{8g}$  excited state is  $0.553 \mu\text{s}$ . Local distortion around the  $\text{Eu}^{2+}$  impurity, relative to experimental crystal structure  $d_{\text{Ca-F}} = 2.366$  Å, is  $d_{\text{Eu-F},e}(1\Gamma_{6u}) - d_{\text{Ca-F}} = +0.022$ ; ionic radii mismatch is  $+0.13 \text{ \AA}^{31}$ . See Fig. 3, S3 and text for details.

| State                                                 | $d_{\text{Eu-F},e}$ | $\omega_{a_{1g}}$ | $T_e$ | $f_i^{abs}/f_{ref}$ <sup>a</sup> | $f_i^{emi}/f_{ref}$ <sup>a</sup> | weights of terms larger than 10% <sup>b</sup> |       |              |       |                                 |
|-------------------------------------------------------|---------------------|-------------------|-------|----------------------------------|----------------------------------|-----------------------------------------------|-------|--------------|-------|---------------------------------|
| $\text{Eu}^{2+}$ -doped $\text{CaF}_2$                |                     |                   |       |                                  |                                  |                                               |       |              |       |                                 |
| $4f^7(^8S_{7/2})$ <sup>c</sup>                        |                     |                   |       |                                  |                                  |                                               |       |              |       |                                 |
| 1 $\Gamma_{6u}$                                       | 2.388               | 423               | 0     | 1.00                             | 97.76                            | 1 $^8A_{1u}$                                  |       |              |       |                                 |
| 1 $\Gamma_{8u}$                                       | 2.388               | 423               | 0     | 0.86                             | 97.76                            | 1 $^8A_{1u}$                                  |       |              |       |                                 |
| 1 $\Gamma_{7u}$                                       | 2.388               | 423               | 0     | 0.04                             | 97.76                            | 1 $^8A_{1u}$                                  |       |              |       |                                 |
| $4f^6(5d + IT E_{a_{1g}})^1$ excited states           |                     |                   |       |                                  |                                  |                                               |       |              |       |                                 |
| $4f^6(^7F_J)5de_g^1$ High-Spin coupling <sup>d</sup>  |                     |                   |       |                                  |                                  |                                               |       |              |       |                                 |
| 1 $\Gamma_{8g}$                                       | 2.373               | 428               | 25720 | 1.00                             | 51.00                            | 1 $^8T_{2g}$                                  | 31.49 | 1 $^8T_{1g}$ | 11.47 | 1 $^8E_g$                       |
| 1 $\Gamma_{7g}$                                       | 2.373               | 428               | 25897 | 0.54                             | 55.32                            | 1 $^8T_{2g}$                                  | 34.13 | 1 $^8T_{1g}$ |       |                                 |
| 2 $\Gamma_{8g}$                                       | 2.372               | 428               | 25984 | 0.09                             | 68.21                            | 1 $^8T_{2g}$                                  | 20.76 | 1 $^8E_g$    |       |                                 |
| 2 $\Gamma_{7g}$                                       | 2.372               | 428               | 26407 | 0.74                             | 41.59                            | 1 $^8T_{1g}$                                  | 41.14 | 1 $^8T_{2g}$ | 13.55 | 1 $^8E_g$                       |
| 3 $\Gamma_{8g}$                                       | 2.372               | 427               | 26676 | 0.99                             | 34.12                            | 1 $^8T_{2g}$                                  | 29.75 | 1 $^8E_g$    | 26.23 | 1 $^8T_{1g}$                    |
| 1 $\Gamma_{6g}$                                       | 2.372               | 427               | 26797 | 0.38                             | 32.70                            | 1 $^8E_g$                                     | 27.51 | 1 $^8T_{2g}$ | 20.68 | 1 $^8T_{1g}$ 14.25 2 $^8T_{1g}$ |
| 4 $\Gamma_{8g}$                                       | 2.373               | 428               | 27326 | 2.10                             | 57.24                            | 1 $^8T_{1g}$                                  | 17.05 | 1 $^8T_{2g}$ | 13.08 | 2 $^8T_{1g}$                    |
| 2 $\Gamma_{6g}$                                       | 2.372               | 428               | 27376 | 0.26                             | 36.28                            | 1 $^8T_{2g}$                                  | 19.85 | 2 $^8T_{1g}$ | 19.21 | 1 $^8E_g$ 18.83 1 $^8T_{1g}$    |
| 5 $\Gamma_{8g}$                                       | 2.372               | 426               | 27511 | 0.25                             | 49.00                            | 1 $^8E_g$                                     | 27.02 | 2 $^8T_{1g}$ | 17.52 | 1 $^8T_{2g}$                    |
| 3 $\Gamma_{7g}$                                       | 2.372               | 428               | 27602 | 0.87                             | 46.62                            | 1 $^8T_{1g}$                                  | 28.71 | 1 $^8E_g$    | 19.55 | 1 $^8T_{2g}$                    |
| 6 $\Gamma_{8g}$                                       | 2.372               | 427               | 27779 | 0.44                             | 36.07                            | 1 $^8E_g$                                     | 34.16 | 1 $^8T_{2g}$ | 12.48 | 1 $^8T_{1g}$ 10.57 2 $^8T_{2g}$ |
| 7 $\Gamma_{8g}$                                       | 2.372               | 429               | 28219 | 0.72                             | 40.15                            | 2 $^8T_{1g}$                                  | 22.52 | 1 $^8T_{1g}$ | 17.94 | 1 $^8T_{2g}$ 17.64 2 $^8T_{2g}$ |
| 3 $\Gamma_{6g}$                                       | 2.372               | 429               | 28221 | 0.74                             | 48.24                            | 1 $^8T_{1g}$                                  | 19.50 | 2 $^8T_{1g}$ | 18.55 | 2 $^8T_{2g}$                    |
| 8 $\Gamma_{8g}$                                       | 2.372               | 428               | 28738 | 1.79                             | 50.76                            | 1 $^8T_{1g}$                                  | 24.95 | 2 $^8T_{1g}$ | 11.50 | 1 $^8T_{2g}$                    |
| 9 $\Gamma_{8g}$                                       | 2.372               | 428               | 28823 | 0.48                             | 26.68                            | 1 $^8T_{2g}$                                  | 23.99 | 1 $^8E_g$    | 18.32 | 2 $^8T_{1g}$ 16.50 1 $^8T_{1g}$ |
|                                                       |                     |                   |       |                                  | 14.01                            | 2 $^8T_{2g}$                                  |       |              |       |                                 |
| 4 $\Gamma_{7g}$                                       | 2.372               | 428               | 28870 | 0.60                             | 31.19                            | 1 $^8T_{2g}$                                  | 25.68 | 1 $^8T_{1g}$ | 22.02 | 1 $^8E_g$ 10.58 2 $^8T_{1g}$    |
|                                                       |                     |                   |       |                                  | 10.18                            | 2 $^8T_{2g}$                                  |       |              |       |                                 |
| 4 $\Gamma_{6g}$                                       | 2.372               | 429               | 28916 | 0.31                             | 29.84                            | 2 $^8T_{1g}$                                  | 24.84 | 1 $^8T_{2g}$ | 24.10 | 2 $^8T_{2g}$ 15.49 1 $^8T_{1g}$ |
| 5 $\Gamma_{7g}$                                       | 2.372               | 430               | 29006 | 0.99                             | 39.81                            | 1 $^8T_{1g}$                                  | 30.80 | 1 $^8T_{2g}$ | 23.62 | 2 $^8T_{1g}$                    |
| 10 $\Gamma_{8g}$                                      | 2.372               | 428               | 29256 | 0.01                             | 55.51                            | 2 $^8T_{2g}$                                  | 22.40 | 1 $^8E_g$    | 16.32 | 1 $^8T_{2g}$                    |
| 5 $\Gamma_{6g}$                                       | 2.372               | 429               | 29259 | 0.07                             | 52.76                            | 2 $^8T_{2g}$                                  | 23.28 | 1 $^8T_{2g}$ | 12.29 | 2 $^8T_{1g}$ 10.12 1 $^8E_g$    |
| 11 $\Gamma_{8g}$                                      | 2.372               | 428               | 29545 | 0.98                             | 34.42                            | 1 $^8T_{2g}$                                  | 26.81 | 1 $^8T_{1g}$ | 18.48 | 1 $^8E_g$ 15.65 2 $^8T_{1g}$    |
| 6 $\Gamma_{6g}$                                       | 2.372               | 429               | 29549 | 0.57                             | 41.65                            | 1 $^8T_{2g}$                                  | 19.23 | 1 $^8T_{1g}$ | 18.74 | 2 $^8T_{2g}$ 14.56 2 $^8T_{1g}$ |
| 6 $\Gamma_{7g}$                                       | 2.372               | 429               | 30023 | 0.01                             | 54.67                            | 2 $^8T_{1g}$                                  | 18.58 | 2 $^8T_{2g}$ | 13.20 | 1 $^8T_{2g}$                    |
| 14 $\Gamma_{8g}$                                      | 2.372               | 429               | 30260 | 1.37                             | 41.50                            | 2 $^8T_{1g}$                                  | 26.42 | 1 $^8T_{1g}$ | 16.03 | 2 $^8T_{2g}$ 10.30 1 $^8T_{2g}$ |
| 7 $\Gamma_{7g}$                                       | 2.372               | 428               | 30685 |                                  | 72.69                            | 2 $^8T_{2g}$                                  | 13.28 | 1 $^8E_g$    |       |                                 |
| 15 $\Gamma_{8g}$                                      | 2.372               | 429               | 30738 | 3.19                             | 65.59                            | 1 $^8T_{1g}$                                  | 23.35 | 1 $^8T_{2g}$ |       |                                 |
| 7 $\Gamma_{6g}$                                       | 2.372               | 429               | 30758 | 1.71                             | 70.89                            | 1 $^8T_{1g}$                                  | 23.27 | 1 $^8T_{2g}$ |       |                                 |
| 16 $\Gamma_{8g}$                                      | 2.372               | 429               | 30867 | 0.87                             | 55.89                            | 2 $^8T_{2g}$                                  | 20.59 | 2 $^8T_{1g}$ | 13.81 | 1 $^8T_{1g}$                    |
| 8 $\Gamma_{6g}$                                       | 2.372               | 429               | 30998 | 0.14                             | 54.15                            | 2 $^8T_{2g}$                                  | 30.54 | 2 $^8T_{1g}$ |       |                                 |
| 18 $\Gamma_{8g}$                                      | 2.372               | 428               | 31238 | 1.27                             | 42.66                            | 2 $^8T_{1g}$                                  | 20.62 | 1 $^8T_{1g}$ | 16.96 | 1 $^8E_g$                       |
| 9 $\Gamma_{6g}$                                       | 2.372               | 428               | 31295 | 0.05                             | 55.46                            | 2 $^8T_{1g}$                                  | 17.91 | 2 $^8T_{2g}$ | 12.84 | 1 $^8E_g$ 10.56 1 $^8T_{2g}$    |
| 19 $\Gamma_{8g}$                                      | 2.372               | 429               | 31600 | 0.16                             | 67.44                            | 2 $^8T_{1g}$                                  | 11.14 | 1 $^8E_g$    |       |                                 |
| 9 $\Gamma_{7g}$                                       | 2.372               | 429               | 31753 |                                  | 76.40                            | 2 $^8T_{1g}$                                  |       |              |       |                                 |
| 20 $\Gamma_{8g}$                                      | 2.372               | 429               | 32531 | 0.02                             | 87.68                            | 2 $^8T_{2g}$                                  |       |              |       |                                 |
| 21 $\Gamma_{8g}$                                      | 2.372               | 429               | 32707 | 0.01                             | 78.56                            | 2 $^8T_{2g}$                                  | 18.93 | 2 $^8T_{1g}$ |       |                                 |
| 10 $\Gamma_{7g}$                                      | 2.372               | 429               | 32742 |                                  | 80.31                            | 2 $^8T_{2g}$                                  | 18.12 | 2 $^8T_{1g}$ |       |                                 |
| $4f^6(^7F_J)5de_g^1$ Mixed-Spin coupling <sup>d</sup> |                     |                   |       |                                  |                                  |                                               |       |              |       |                                 |

|                                                                              |               |       |     |       |      |       |                |       |                |       |                |       |                |
|------------------------------------------------------------------------------|---------------|-------|-----|-------|------|-------|----------------|-------|----------------|-------|----------------|-------|----------------|
| 12                                                                           | $\Gamma_{8g}$ | 2.373 | 427 | 29855 | 0.24 | 50.18 | 1 ${}^6T_{1g}$ | 13.53 | 1 ${}^8T_{2g}$ | 12.57 | 2 ${}^8T_{1g}$ | 10.93 | 2 ${}^8T_{2g}$ |
| 13                                                                           | $\Gamma_{8g}$ | 2.372 | 428 | 29950 | 0.38 | 42.22 | 1 ${}^6T_{1g}$ | 15.14 | 1 ${}^8E_g$    | 12.74 | 2 ${}^8T_{2g}$ | 12.61 | 2 ${}^8T_{1g}$ |
|                                                                              |               |       |     |       |      | 10.38 | 1 ${}^8T_{2g}$ |       |                |       |                |       |                |
| $4f^6({}^7F_J)5de_g^1$ Low-Spin coupling <sup>d</sup>                        |               |       |     |       |      |       |                |       |                |       |                |       |                |
| 8                                                                            | $\Gamma_{7g}$ | 2.372 | 427 | 31106 | 0.01 | 83.67 | 1 ${}^6T_{1g}$ | 12.47 | 1 ${}^6T_{2g}$ |       |                |       |                |
| 17                                                                           | $\Gamma_{8g}$ | 2.372 | 427 | 31202 | 0.17 | 81.84 | 1 ${}^6T_{1g}$ |       |                |       |                |       |                |
| 10                                                                           | $\Gamma_{6g}$ | 2.370 | 428 | 32743 | 0.02 | 49.43 | 1 ${}^6T_{1g}$ | 34.31 | 1 ${}^6T_{2g}$ | 13.51 | 2 ${}^6T_{1g}$ |       |                |
| 22                                                                           | $\Gamma_{8g}$ | 2.371 | 428 | 32877 | 0.04 | 54.33 | 1 ${}^6T_{1g}$ | 31.95 | 1 ${}^6T_{2g}$ | 11.23 | 2 ${}^6T_{1g}$ |       |                |
| 11                                                                           | $\Gamma_{7g}$ | 2.371 | 428 | 33177 | 0.03 | 75.35 | 1 ${}^6T_{1g}$ | 11.53 | 1 ${}^6T_{2g}$ |       |                |       |                |
| 11                                                                           | $\Gamma_{6g}$ | 2.369 | 428 | 33390 | 0.01 | 55.12 | 1 ${}^6T_{2g}$ | 26.34 | 1 ${}^6E_g$    | 16.16 | 1 ${}^6T_{1g}$ |       |                |
| 23                                                                           | $\Gamma_{8g}$ | 2.370 | 428 | 33632 | 0.02 | 27.98 | 1 ${}^6E_g$    | 26.93 | 1 ${}^6T_{1g}$ | 19.86 | 1 ${}^6T_{2g}$ | 18.97 | 2 ${}^6T_{1g}$ |
| 12                                                                           | $\Gamma_{7g}$ | 2.370 | 429 | 33723 |      | 48.88 | 2 ${}^6T_{1g}$ | 23.30 | 1 ${}^6E_g$    | 19.13 | 1 ${}^6T_{2g}$ |       |                |
| 24                                                                           | $\Gamma_{8g}$ | 2.369 | 428 | 34252 | 0.01 | 30.17 | 1 ${}^6E_g$    | 29.69 | 2 ${}^6T_{1g}$ | 25.51 | 1 ${}^6T_{2g}$ |       |                |
| 13                                                                           | $\Gamma_{7g}$ | 2.370 | 430 | 34392 |      | 39.51 | 1 ${}^6T_{2g}$ | 31.62 | 2 ${}^6T_{1g}$ | 22.37 | 1 ${}^6T_{1g}$ |       |                |
| 12                                                                           | $\Gamma_{6g}$ | 2.372 | 429 | 34401 | 0.01 | 62.39 | 2 ${}^6T_{1g}$ | 17.50 | 1 ${}^6T_{1g}$ |       |                |       |                |
| 25                                                                           | $\Gamma_{8g}$ | 2.369 | 428 | 34962 | 0.02 | 39.13 | 2 ${}^6T_{1g}$ | 23.79 | 1 ${}^6T_{2g}$ | 22.94 | 1 ${}^6E_g$    | 11.11 | 2 ${}^6T_{2g}$ |
| 26                                                                           | $\Gamma_{8g}$ | 2.370 | 430 | 35076 | 0.01 | 50.56 | 1 ${}^6T_{2g}$ | 18.41 | 2 ${}^6T_{1g}$ | 13.40 | 1 ${}^6T_{1g}$ | 11.72 | 1 ${}^6E_g$    |
| 27                                                                           | $\Gamma_{8g}$ | 2.369 | 428 | 35778 | 0.02 | 32.90 | 1 ${}^6E_g$    | 30.68 | 1 ${}^6T_{2g}$ | 23.64 | 2 ${}^6T_{1g}$ |       |                |
| 13                                                                           | $\Gamma_{6g}$ | 2.369 | 428 | 35820 | 0.01 | 41.06 | 1 ${}^6T_{2g}$ | 38.67 | 1 ${}^6E_g$    | 11.84 | 1 ${}^6T_{1g}$ |       |                |
| 14                                                                           | $\Gamma_{7g}$ | 2.370 | 429 | 35994 |      | 63.69 | 2 ${}^6T_{1g}$ | 12.53 | 1 ${}^6T_{2g}$ | 12.35 | 1 ${}^6E_g$    |       |                |
| 28                                                                           | $\Gamma_{8g}$ | 2.370 | 430 | 36086 | 0.01 | 82.38 | 2 ${}^6T_{2g}$ | 11.17 | 2 ${}^6T_{1g}$ |       |                |       |                |
| 14                                                                           | $\Gamma_{6g}$ | 2.369 | 430 | 36332 | 0.03 | 56.75 | 1 ${}^6T_{2g}$ | 23.93 | 1 ${}^6E_g$    |       |                |       |                |
| 29                                                                           | $\Gamma_{8g}$ | 2.370 | 430 | 36530 | 0.04 | 68.38 | 1 ${}^6T_{2g}$ | 20.43 | 2 ${}^6T_{1g}$ |       |                |       |                |
| 15                                                                           | $\Gamma_{7g}$ | 2.369 | 428 | 37046 |      | 47.03 | 1 ${}^6E_g$    | 42.56 | 2 ${}^6T_{1g}$ |       |                |       |                |
| 30                                                                           | $\Gamma_{8g}$ | 2.369 | 429 | 37415 | 0.04 | 36.06 | 2 ${}^6T_{1g}$ | 33.80 | 1 ${}^6E_g$    | 25.74 | 1 ${}^6T_{2g}$ |       |                |
| 31                                                                           | $\Gamma_{8g}$ | 2.369 | 429 | 37553 | 0.02 | 64.56 | 2 ${}^6T_{2g}$ | 15.31 | 1 ${}^6E_g$    | 15.21 | 2 ${}^6T_{1g}$ |       |                |
| 15                                                                           | $\Gamma_{6g}$ | 2.370 | 430 | 37558 | 0.01 | 84.80 | 2 ${}^6T_{2g}$ | 11.26 | 2 ${}^6T_{1g}$ |       |                |       |                |
| 32                                                                           | $\Gamma_{8g}$ | 2.370 | 429 | 37605 | 0.01 | 66.14 | 2 ${}^6T_{1g}$ | 17.54 | 2 ${}^6T_{2g}$ |       |                |       |                |
| 16                                                                           | $\Gamma_{6g}$ | 2.369 | 428 | 39325 |      | 91.44 | 2 ${}^6T_{2g}$ |       |                |       |                |       |                |
| 33                                                                           | $\Gamma_{8g}$ | 2.369 | 429 | 39343 |      | 90.53 | 2 ${}^6T_{2g}$ |       |                |       |                |       |                |
| 16                                                                           | $\Gamma_{7g}$ | 2.370 | 429 | 39354 |      | 90.02 | 2 ${}^6T_{2g}$ |       |                |       |                |       |                |
| $4f^6({}^7F_J)(5dt_{2g}^1 + ITE_{a_1g}^1)$ High-Spin coupling <sup>d,e</sup> |               |       |     |       |      |       |                |       |                |       |                |       |                |
| 34                                                                           | $\Gamma_{8g}$ | 2.419 | 401 | 46209 | 0.47 | 39.85 | 3 ${}^8T_{2g}$ | 32.64 | 3 ${}^8T_{1g}$ |       |                |       |                |
| 35                                                                           | $\Gamma_{8g}$ | 2.419 | 407 | 46403 | 0.24 | 49.49 | 4 ${}^8T_{1g}$ | 25.18 | 2 ${}^8E_g$    | 16.72 | 4 ${}^8T_{2g}$ |       |                |
| 17                                                                           | $\Gamma_{6g}$ | 2.417 | 324 | 46948 | 0.19 | 39.83 | 3 ${}^8T_{2g}$ | 36.67 | 3 ${}^8T_{1g}$ |       |                |       |                |
| 17                                                                           | $\Gamma_{7g}$ | 2.420 | 372 | 46979 | 0.58 | 41.85 | 3 ${}^8T_{2g}$ |       |                |       |                |       |                |
| 36                                                                           | $\Gamma_{8g}$ | 2.420 | 377 | 47043 | 0.69 | 39.85 | 4 ${}^8T_{1g}$ | 31.81 | 4 ${}^8T_{2g}$ | 20.65 | 2 ${}^8E_g$    |       |                |
| 18                                                                           | $\Gamma_{7g}$ | 2.420 | 384 | 47529 | 1.23 | 62.43 | 4 ${}^8T_{2g}$ | 13.53 | 5 ${}^8T_{1g}$ | 12.78 | 2 ${}^8E_g$    |       |                |
| 18                                                                           | $\Gamma_{6g}$ | 2.419 | 376 | 47531 | 0.49 | 63.21 | 4 ${}^8T_{1g}$ | 15.45 | 2 ${}^8E_g$    |       |                |       |                |
| 37                                                                           | $\Gamma_{8g}$ | 2.418 | 338 | 47694 | 0.80 | 59.15 | 3 ${}^8T_{1g}$ | 33.76 | 3 ${}^8T_{2g}$ |       |                |       |                |
| 38                                                                           | $\Gamma_{8g}$ | 2.419 | 345 | 48144 | 3.21 | 44.03 | 4 ${}^8T_{2g}$ | 31.51 | 2 ${}^8E_g$    | 17.64 | 4 ${}^8T_{1g}$ |       |                |
| 39                                                                           | $\Gamma_{8g}$ | 2.418 | 338 | 48284 | 2.11 | 55.87 | 3 ${}^8T_{1g}$ | 20.48 | 3 ${}^8T_{2g}$ |       |                |       |                |
| 40                                                                           | $\Gamma_{8g}$ | 2.419 | 353 | 48627 | 4.16 | 46.28 | 4 ${}^8T_{2g}$ | 35.05 | 4 ${}^8T_{1g}$ |       |                |       |                |
| 19                                                                           | $\Gamma_{7g}$ | 2.418 | 311 | 48749 | 3.45 | 47.65 | 3 ${}^8T_{1g}$ | 45.41 | 3 ${}^8T_{2g}$ |       |                |       |                |
| 20                                                                           | $\Gamma_{7g}$ | 2.418 | 320 | 48940 | 1.59 | 39.82 | 4 ${}^8T_{2g}$ | 27.82 | 2 ${}^8E_g$    | 18.85 | 5 ${}^8T_{1g}$ | 11.24 | 4 ${}^8T_{1g}$ |
| 19                                                                           | $\Gamma_{6g}$ | 2.418 | 283 | 48992 | 0.69 | 39.06 | 3 ${}^8T_{1g}$ | 37.92 | 3 ${}^8T_{2g}$ |       |                |       |                |
| 41                                                                           | $\Gamma_{8g}$ | 2.420 | 349 | 49130 | 2.73 | 29.06 | 4 ${}^8T_{2g}$ | 25.75 | 4 ${}^8T_{1g}$ | 17.31 | 5 ${}^8T_{1g}$ | 13.86 | 2 ${}^8E_g$    |
| 20                                                                           | $\Gamma_{6g}$ | 2.376 | 289 | 49355 | 0.01 | 52.07 | 4 ${}^8T_{1g}$ | 33.90 | 2 ${}^8E_g$    |       |                |       |                |
| 21                                                                           | $\Gamma_{6g}$ | 2.388 | 318 | 49508 | 0.29 | 40.35 | 3 ${}^8T_{1g}$ | 25.22 | 3 ${}^8T_{2g}$ |       |                |       |                |
| 21                                                                           | $\Gamma_{7g}$ | 2.419 | 358 | 49558 | 1.03 | 47.34 | 4 ${}^8T_{1g}$ | 33.40 | 5 ${}^8T_{1g}$ |       |                |       |                |
| 42                                                                           | $\Gamma_{8g}$ | 2.419 | 312 | 49617 | 0.15 | 59.70 | 3 ${}^8T_{1g}$ | 19.30 | 3 ${}^8T_{2g}$ |       |                |       |                |
| 43                                                                           | $\Gamma_{8g}$ | 2.409 | 297 | 49740 | 0.02 | 47.39 | 4 ${}^8T_{1g}$ | 11.49 | 4 ${}^8T_{2g}$ | 10.95 | 3 ${}^8T_{2g}$ | 10.57 | 2 ${}^8E_g$    |
| 22                                                                           | $\Gamma_{6g}$ | 2.407 | 380 | 49843 | 0.35 | 52.76 | 4 ${}^8T_{2g}$ | 21.08 | 4 ${}^8T_{1g}$ | 19.27 | 5 ${}^8T_{1g}$ |       |                |
| 22                                                                           | $\Gamma_{7g}$ | 2.421 | 348 | 49844 | 0.17 | 48.77 | 4 ${}^8T_{1g}$ | 28.51 | 4 ${}^8T_{2g}$ | 10.95 | 5 ${}^8T_{1g}$ |       |                |
| 44                                                                           | $\Gamma_{8g}$ | 2.385 | 318 | 49937 | 1.00 | 57.68 | 3 ${}^8T_{2g}$ | 25.40 | 3 ${}^8T_{1g}$ |       |                |       |                |
| 45                                                                           | $\Gamma_{8g}$ | 2.412 | 295 | 50150 | 3.28 | 42.95 | 4 ${}^8T_{2g}$ | 24.08 | 4 ${}^8T_{1g}$ | 20.55 | 5 ${}^8T_{1g}$ |       |                |
| 23                                                                           | $\Gamma_{7g}$ | 2.413 | 350 | 50162 | 0.01 | 40.48 | 3 ${}^8T_{1g}$ | 24.08 | 3 ${}^8T_{2g}$ |       |                |       |                |
| 23                                                                           | $\Gamma_{6g}$ | 2.405 | 393 | 50202 | 4.00 | 45.21 | 3 ${}^8T_{1g}$ | 30.11 | 3 ${}^8T_{2g}$ |       |                |       |                |
| 46                                                                           | $\Gamma_{8g}$ | 2.413 | 343 | 50216 | 0.11 | 37.24 | 2 ${}^8E_g$    | 25.27 | 5 ${}^8T_{1g}$ | 18.77 | 4 ${}^8T_{2g}$ | 11.85 | 4 ${}^8T_{1g}$ |
| 47                                                                           | $\Gamma_{8g}$ | 2.409 | 356 | 50336 | 2.65 | 57.28 | 3 ${}^8T_{2g}$ | 24.35 | 3 ${}^8T_{1g}$ |       |                |       |                |

|    |               |       |      |       |      |       |             |       |             |       |             |       |             |
|----|---------------|-------|------|-------|------|-------|-------------|-------|-------------|-------|-------------|-------|-------------|
| 24 | $\Gamma_{7g}$ | 2.400 | 602  | 50362 | 1.30 | 29.65 | $5^8T_{1g}$ | 24.48 | $4^8T_{1g}$ | 17.05 | $2^8E_g$    | 12.58 | $4^8T_{2g}$ |
| 48 | $\Gamma_{8g}$ | 2.407 | 366  | 50433 | 0.40 | 63.73 | $3^8T_{2g}$ | 32.80 | $3^8T_{1g}$ |       |             |       |             |
| 49 | $\Gamma_{8g}$ | 2.397 | 434  | 50664 | 0.67 | 23.27 | $6^8T_{1g}$ | 15.18 | $5^8T_{1g}$ | 14.50 | $3^8E_g$    | 11.68 | $5^8T_{2g}$ |
|    |               |       |      |       |      | 10.19 | $4^8T_{1g}$ |       |             |       |             |       |             |
| 24 | $\Gamma_{6g}$ | 2.391 | 413  | 50669 | 0.20 | 19.07 | $4^8T_{2g}$ | 16.21 | $6^8T_{1g}$ | 14.37 | $3^8T_{1g}$ | 10.69 | $4^8T_{1g}$ |
| 50 | $\Gamma_{8g}$ | 2.400 | 500  | 50774 | 1.66 | 29.22 | $4^8T_{2g}$ | 27.72 | $2^8E_g$    | 10.93 | $5^8T_{1g}$ |       |             |
| 25 | $\Gamma_{7g}$ | 2.405 | 350  | 50964 | 0.13 | 22.06 | $3^8E_g$    | 21.67 | $6^8T_{1g}$ | 20.31 | $5^8T_{2g}$ | 13.08 | $4^8T_{2g}$ |
| 51 | $\Gamma_{8g}$ | 2.401 | 382  | 50972 | 0.20 | 24.42 | $4^8T_{1g}$ | 21.13 | $5^8T_{1g}$ | 19.61 | $2^8E_g$    | 12.57 | $6^8T_{1g}$ |
| 25 | $\Gamma_{6g}$ | 2.392 | 394  | 51032 | 0.16 | 40.21 | $4^8T_{2g}$ | 19.87 | $3^8E_g$    | 13.86 | $6^8T_{1g}$ |       |             |
| 26 | $\Gamma_{7g}$ | 2.405 | 373  | 51281 | 0.84 | 43.31 | $5^8T_{1g}$ | 12.64 | $6^8T_{1g}$ | 11.90 | $4^8T_{2g}$ | 11.04 | $5^8T_{2g}$ |
| 52 | $\Gamma_{8g}$ | 2.410 | 335  | 51415 | 0.98 | 29.09 | $5^8T_{1g}$ | 18.71 | $3^8E_g$    | 15.85 | $6^8T_{1g}$ | 11.32 | $5^8T_{2g}$ |
| 26 | $\Gamma_{6g}$ | 2.389 | 395  | 51430 | 0.12 | 59.10 | $5^8T_{1g}$ | 16.88 | $2^8E_g$    | 12.11 | $4^8T_{1g}$ |       |             |
| 27 | $\Gamma_{7g}$ | 2.398 | 693  | 51430 | 0.61 | 45.78 | $3^8T_{1g}$ | 38.48 | $3^8T_{2g}$ |       |             |       |             |
| 53 | $\Gamma_{8g}$ | 2.396 | 317  | 51471 | 0.28 | 32.13 | $4^8T_{2g}$ | 18.88 | $5^8T_{2g}$ | 16.15 | $2^8E_g$    | 14.18 | $3^8E_g$    |
| 54 | $\Gamma_{8g}$ | 2.405 | 356  | 51604 | 1.55 | 19.68 | $5^8T_{2g}$ | 17.84 | $3^8E_g$    | 15.97 | $4^8T_{2g}$ | 13.33 | $2^8E_g$    |
| 27 | $\Gamma_{6g}$ | 2.396 | 440  | 51612 | 0.01 | 32.46 | $3^8T_{2g}$ | 14.82 | $5^8T_{2g}$ | 13.32 | $3^8T_{1g}$ |       |             |
| 55 | $\Gamma_{8g}$ | 2.395 | 428  | 51672 | 3.57 | 49.71 | $3^8T_{2g}$ | 30.23 | $3^8T_{1g}$ |       |             |       |             |
| 28 | $\Gamma_{7g}$ | 2.394 | 489  | 51712 | 0.16 | 47.66 | $3^8T_{1g}$ | 46.21 | $3^8T_{2g}$ |       |             |       |             |
| 28 | $\Gamma_{6g}$ | 2.392 | 437  | 51722 | 1.05 | 32.39 | $5^8T_{2g}$ | 17.56 | $3^8T_{2g}$ |       |             |       |             |
| 56 | $\Gamma_{8g}$ | 2.389 | 437  | 51919 | 5.37 | 29.81 | $3^8T_{1g}$ | 18.59 | $3^8T_{2g}$ | 10.82 | $3^8E_g$    | 10.13 | $5^8T_{1g}$ |
| 57 | $\Gamma_{8g}$ | 2.390 | 441  | 51938 | 1.41 | 30.23 | $3^8T_{1g}$ | 20.51 | $3^8T_{2g}$ | 17.97 | $5^8T_{1g}$ |       |             |
| 29 | $\Gamma_{6g}$ | 2.405 | 448  | 52069 | 2.94 | 38.33 | $4^8T_{2g}$ | 19.72 | $2^8E_g$    |       |             |       |             |
| 58 | $\Gamma_{8g}$ | 2.399 | 522  | 52082 | 3.81 | 17.24 | $4^8T_{2g}$ | 16.62 | $5^8T_{2g}$ | 16.04 | $5^8T_{1g}$ | 15.63 | $4^8T_{1g}$ |
|    |               |       |      |       |      | 12.11 | $2^8E_g$    |       |             |       |             |       |             |
| 59 | $\Gamma_{8g}$ | 2.397 | 518  | 52192 | 2.22 | 25.48 | $6^8T_{1g}$ | 12.36 | $3^8E_g$    | 10.76 | $5^8T_{1g}$ |       |             |
| 60 | $\Gamma_{8g}$ | 2.393 | 475  | 52499 | 0.80 | 32.95 | $3^8E_g$    | 30.70 | $5^8T_{2g}$ | 19.87 | $5^8T_{1g}$ |       |             |
| 30 | $\Gamma_{6g}$ | 2.391 | 494  | 52534 | 0.37 | 49.30 | $5^8T_{2g}$ |       |             |       |             |       |             |
| 29 | $\Gamma_{7g}$ | 2.377 | 454  | 52712 | 0.02 | 31.64 | $6^8T_{1g}$ | 15.26 | $5^8T_{1g}$ |       |             |       |             |
| 30 | $\Gamma_{7g}$ | 2.380 | 469  | 52782 | 0.03 | 17.63 | $6^8T_{1g}$ | 17.58 | $4^8T_{1g}$ | 16.60 | $5^8T_{1g}$ | 10.67 | $4^8T_{2g}$ |
| 31 | $\Gamma_{6g}$ | 2.394 | 483  | 52815 | 0.39 | 71.42 | $5^8T_{1g}$ | 13.58 | $4^8T_{2g}$ |       |             |       |             |
| 61 | $\Gamma_{8g}$ | 2.387 | 466  | 52819 | 0.24 | 45.72 | $5^8T_{1g}$ | 12.80 | $4^8T_{2g}$ | 10.81 | $3^8E_g$    | 10.51 | $4^8T_{1g}$ |
| 62 | $\Gamma_{8g}$ | 2.390 | 456  | 52994 | 0.17 | 41.25 | $5^8T_{1g}$ | 17.96 | $6^8T_{1g}$ |       |             |       |             |
| 31 | $\Gamma_{7g}$ | 2.380 | 462  | 53160 | 0.33 | 31.61 | $3^8E_g$    | 14.76 | $4^8T_{1g}$ | 11.81 | $4^8T_{2g}$ | 10.99 | $2^8E_g$    |
| 63 | $\Gamma_{8g}$ | 2.389 | 461  | 53163 | 0.30 | 41.91 | $5^8T_{1g}$ | 25.90 | $5^8T_{2g}$ | 12.82 | $6^8T_{1g}$ |       |             |
| 32 | $\Gamma_{6g}$ | 2.396 | 542  | 53209 | 0.25 | 35.96 | $6^8T_{1g}$ | 22.16 | $5^8T_{2g}$ | 17.87 | $3^8E_g$    |       |             |
| 64 | $\Gamma_{8g}$ | 2.393 | 508  | 53305 | 0.58 | 43.46 | $5^8T_{2g}$ | 42.40 | $6^8T_{1g}$ |       |             |       |             |
| 65 | $\Gamma_{8g}$ | 2.393 | 480  | 53752 | 0.07 | 46.27 | $5^8T_{2g}$ | 14.36 | $3^8E_g$    |       |             |       |             |
| 32 | $\Gamma_{7g}$ | 2.394 | 435  | 53885 |      | 74.23 | $5^8T_{2g}$ |       |             |       |             |       |             |
| 33 | $\Gamma_{6g}$ | 2.387 | 446  | 54020 | 0.09 | 28.56 | $6^8T_{1g}$ | 21.91 | $3^8E_g$    |       |             |       |             |
| 66 | $\Gamma_{8g}$ | 2.392 | 455  | 54085 | 0.33 | 50.13 | $6^8T_{1g}$ | 29.38 | $5^8T_{2g}$ | 11.34 | $3^8E_g$    |       |             |
| 67 | $\Gamma_{8g}$ | 2.396 | 577  | 54338 | 0.41 | 45.18 | $5^8T_{2g}$ | 23.09 | $3^8E_g$    |       |             |       |             |
| 33 | $\Gamma_{7g}$ | 2.386 | 496  | 54401 | 0.11 | 55.55 | $6^8T_{1g}$ | 19.53 | $3^8E_g$    |       |             |       |             |
| 34 | $\Gamma_{6g}$ | 2.398 | 662  | 54510 | 0.07 | 42.67 | $5^8T_{2g}$ | 20.19 | $6^8T_{1g}$ |       |             |       |             |
| 68 | $\Gamma_{8g}$ | 2.398 | 671  | 54520 | 0.19 | 32.67 | $5^8T_{2g}$ | 31.05 | $6^8T_{1g}$ | 16.71 | $3^8E_g$    |       |             |
| 34 | $\Gamma_{7g}$ | 2.392 | 607  | 54527 | 0.10 | 42.06 | $5^8T_{2g}$ | 16.80 | $3^8E_g$    |       |             |       |             |
| 69 | $\Gamma_{8g}$ | 2.396 | 760  | 54573 | 0.37 | 47.31 | $6^8T_{1g}$ | 27.41 | $3^8E_g$    | 14.82 | $5^8T_{2g}$ |       |             |
| 35 | $\Gamma_{7g}$ | 2.398 | 1031 | 54764 | 0.24 | 42.11 | $6^8T_{1g}$ |       |             |       |             |       |             |
| 70 | $\Gamma_{8g}$ | 2.399 | 1033 | 54978 | 0.41 | 48.50 | $6^8T_{1g}$ | 15.35 | $3^8E_g$    |       |             |       |             |
| 35 | $\Gamma_{6g}$ | 2.400 | 1074 | 55022 | 0.20 | 48.20 | $6^8T_{1g}$ | 14.55 | $3^8E_g$    |       |             |       |             |

 $4f^7$  excited states $4f^7(^6P_{3/2,5/2,7/2})^c$ 

|   |               |       |     |       |  |       |             |       |             |  |  |  |  |
|---|---------------|-------|-----|-------|--|-------|-------------|-------|-------------|--|--|--|--|
| 2 | $\Gamma_{8u}$ | 2.386 | 422 | 30442 |  | 89.24 | $1^6T_{1u}$ |       |             |  |  |  |  |
| 2 | $\Gamma_{7u}$ | 2.386 | 422 | 30453 |  | 89.74 | $1^6T_{1u}$ |       |             |  |  |  |  |
| 3 | $\Gamma_{8u}$ | 2.386 | 422 | 30826 |  | 94.06 | $1^6T_{1u}$ |       |             |  |  |  |  |
| 2 | $\Gamma_{6u}$ | 2.386 | 422 | 31053 |  | 85.07 | $1^6T_{1u}$ | 12.15 | $3^6T_{2u}$ |  |  |  |  |
| 4 | $\Gamma_{8u}$ | 2.386 | 422 | 31065 |  | 85.15 | $1^6T_{1u}$ |       |             |  |  |  |  |
| 3 | $\Gamma_{7u}$ | 2.386 | 422 | 31087 |  | 85.28 | $1^6T_{1u}$ | 10.76 | $2^6E_u$    |  |  |  |  |

 $4f^7(^6I_{7/2,9/2,11/2,13/2,15/2,17/2})^c$ 

|   |               |       |     |       |  |       |             |       |          |  |  |  |  |
|---|---------------|-------|-----|-------|--|-------|-------------|-------|----------|--|--|--|--|
| 3 | $\Gamma_{6u}$ | 2.385 | 422 | 34758 |  | 77.14 | $1^6T_{2u}$ | 19.36 | $1^6E_u$ |  |  |  |  |
|---|---------------|-------|-----|-------|--|-------|-------------|-------|----------|--|--|--|--|





|                                            |               |       |     |       |       |             |       |             |       |             |       |             |
|--------------------------------------------|---------------|-------|-----|-------|-------|-------------|-------|-------------|-------|-------------|-------|-------------|
| 17                                         | $\Gamma_{7u}$ | 2.384 | 422 | 51799 | 43.56 | $5^6T_{2u}$ | 21.88 | $3^6T_{1u}$ | 15.68 | $4^6T_{2u}$ |       |             |
| 34                                         | $\Gamma_{8u}$ | 2.385 | 422 | 51978 | 24.18 | $2^6A_{2u}$ | 21.24 | $5^6T_{2u}$ | 20.26 | $4^6T_{2u}$ | 10.60 | $3^6E_u$    |
| 18                                         | $\Gamma_{6u}$ | 2.385 | 422 | 52123 | 41.74 | $2^6A_{2u}$ | 31.24 | $5^6T_{2u}$ | 15.08 | $4^6T_{2u}$ |       |             |
| 35                                         | $\Gamma_{8u}$ | 2.385 | 422 | 52384 | 55.99 | $5^6T_{2u}$ | 12.07 | $3^6E_u$    | 11.77 | $2^6A_{2u}$ |       |             |
| 18                                         | $\Gamma_{7u}$ | 2.386 | 422 | 52387 | 39.11 | $4^6T_{1u}$ | 26.12 | $2^6A_{1u}$ | 16.23 | $3^6T_{1u}$ |       |             |
| 19                                         | $\Gamma_{6u}$ | 2.385 | 422 | 52499 | 51.87 | $5^6T_{2u}$ | 24.18 | $3^6E_u$    | 14.49 | $4^6T_{2u}$ |       |             |
| 36                                         | $\Gamma_{8u}$ | 2.385 | 422 | 52530 | 28.21 | $4^6T_{1u}$ | 24.85 | $5^6T_{2u}$ | 14.83 | $3^6T_{1u}$ | 14.02 | $2^6A_{1u}$ |
| 37                                         | $\Gamma_{8u}$ | 2.386 | 423 | 52616 | 46.37 | $4^6T_{1u}$ | 21.53 | $5^6T_{2u}$ |       |             |       |             |
| 19                                         | $\Gamma_{7u}$ | 2.386 | 422 | 52744 | 77.81 | $4^6T_{1u}$ |       |             |       |             |       |             |
| 20                                         | $\Gamma_{6u}$ | 2.387 | 422 | 52793 | 67.34 | $4^6T_{1u}$ |       |             |       |             |       |             |
| 38                                         | $\Gamma_{8u}$ | 2.386 | 422 | 52909 | 47.86 | $5^6T_{2u}$ | 31.75 | $4^6T_{1u}$ |       |             |       |             |
| $4f^7(^6H_{5/2,7/2,9/2,11/2,13/2,15/2})^c$ |               |       |     |       |       |             |       |             |       |             |       |             |
| 20                                         | $\Gamma_{7u}$ | 2.385 | 423 | 55493 | 57.10 | $5^6T_{1u}$ | 27.00 | $4^6E_u$    |       |             |       |             |
| 39                                         | $\Gamma_{8u}$ | 2.385 | 422 | 55617 | 45.16 | $5^6T_{1u}$ | 23.05 | $4^6E_u$    | 14.81 | $6^6T_{2u}$ | 10.19 | $6^6T_{1u}$ |
| 40                                         | $\Gamma_{8u}$ | 2.384 | 423 | 55790 | 81.51 | $5^6T_{1u}$ | 11.96 | $4^6E_u$    |       |             |       |             |
| 21                                         | $\Gamma_{6u}$ | 2.384 | 423 | 55869 | 64.47 | $5^6T_{1u}$ | 11.93 | $4^6E_u$    |       |             |       |             |
| 41                                         | $\Gamma_{8u}$ | 2.384 | 423 | 55871 | 68.06 | $5^6T_{1u}$ | 20.53 | $4^6E_u$    |       |             |       |             |
| 21                                         | $\Gamma_{7u}$ | 2.384 | 423 | 55892 | 46.06 | $4^6E_u$    | 41.02 | $5^6T_{1u}$ | 11.35 | $6^6T_{1u}$ |       |             |
| 42                                         | $\Gamma_{8u}$ | 2.385 | 422 | 55909 | 72.67 | $4^6E_u$    | 12.74 | $6^6T_{1u}$ |       |             |       |             |
| 43                                         | $\Gamma_{8u}$ | 2.384 | 423 | 56039 | 66.90 | $5^6T_{1u}$ | 20.83 | $4^6E_u$    |       |             |       |             |
| 22                                         | $\Gamma_{7u}$ | 2.384 | 421 | 56049 | 64.26 | $5^6T_{1u}$ | 13.82 | $4^6E_u$    |       |             |       |             |
| 22                                         | $\Gamma_{6u}$ | 2.384 | 422 | 56065 | 72.86 | $4^6E_u$    | 17.27 | $5^6T_{1u}$ |       |             |       |             |
| 23                                         | $\Gamma_{7u}$ | 2.386 | 424 | 56116 | 38.82 | $6^6T_{2u}$ | 29.98 | $6^6T_{1u}$ | 18.94 | $5^6T_{1u}$ |       |             |
| 44                                         | $\Gamma_{8u}$ | 2.385 | 423 | 56211 | 42.19 | $6^6T_{1u}$ | 22.47 | $6^6T_{2u}$ | 21.19 | $4^6E_u$    |       |             |
| 23                                         | $\Gamma_{6u}$ | 2.386 | 422 | 56242 | 86.06 | $6^6T_{1u}$ |       |             |       |             |       |             |
| 45                                         | $\Gamma_{8u}$ | 2.386 | 423 | 56335 | 72.83 | $6^6T_{1u}$ | 12.49 | $6^6T_{2u}$ |       |             |       |             |
| 24                                         | $\Gamma_{7u}$ | 2.386 | 423 | 56435 | 82.48 | $6^6T_{1u}$ |       |             |       |             |       |             |
| 24                                         | $\Gamma_{6u}$ | 2.386 | 423 | 56453 | 83.33 | $6^6T_{2u}$ |       |             |       |             |       |             |
| 46                                         | $\Gamma_{8u}$ | 2.386 | 423 | 56485 | 49.73 | $6^6T_{1u}$ | 36.26 | $6^6T_{2u}$ |       |             |       |             |
| 47                                         | $\Gamma_{8u}$ | 2.387 | 423 | 56707 | 86.53 | $6^6T_{2u}$ |       |             |       |             |       |             |
| 48                                         | $\Gamma_{8u}$ | 2.387 | 423 | 56768 | 49.35 | $6^6T_{2u}$ | 37.79 | $6^6T_{1u}$ |       |             |       |             |
| 25                                         | $\Gamma_{6u}$ | 2.387 | 423 | 56774 | 84.93 | $6^6T_{2u}$ |       |             |       |             |       |             |
| 49                                         | $\Gamma_{8u}$ | 2.387 | 423 | 56837 | 47.30 | $6^6T_{2u}$ | 41.15 | $6^6T_{1u}$ |       |             |       |             |
| 25                                         | $\Gamma_{7u}$ | 2.387 | 423 | 56875 | 50.14 | $6^6T_{1u}$ | 39.91 | $6^6T_{2u}$ |       |             |       |             |

 $\text{Eu}^{3+}$ -doped  $\text{CaF}_2$ 

|                   |          |       |     |      |       |             |       |             |       |             |  |  |
|-------------------|----------|-------|-----|------|-------|-------------|-------|-------------|-------|-------------|--|--|
| $4f^6(^7F_{0-6})$ |          |       |     |      |       |             |       |             |       |             |  |  |
| 1                 | $A_{1g}$ | 2.261 | 495 | 0    | 35.10 | $1^7T_{2g}$ | 30.28 | $1^7A_{2g}$ | 28.94 | $1^7T_{1g}$ |  |  |
| 1                 | $T_{1g}$ | 2.260 | 495 | 345  | 35.77 | $1^7A_{2g}$ | 34.53 | $1^7T_{2g}$ | 24.93 | $1^7T_{1g}$ |  |  |
| 1                 | $T_{2g}$ | 2.259 | 497 | 803  | 55.37 | $1^7A_{2g}$ | 32.46 | $1^7T_{2g}$ |       |             |  |  |
| 1                 | $E_g$    | 2.261 | 494 | 1406 | 63.62 | $1^7T_{1g}$ | 32.67 | $1^7T_{2g}$ |       |             |  |  |
| 2                 | $T_{1g}$ | 2.260 | 496 | 1971 | 44.05 | $1^7T_{1g}$ | 28.35 | $1^7A_{2g}$ | 24.96 | $1^7T_{2g}$ |  |  |
| 2                 | $T_{2g}$ | 2.261 | 495 | 2111 | 63.47 | $1^7T_{1g}$ | 23.97 | $1^7T_{2g}$ |       |             |  |  |
| 1                 | $A_{2g}$ | 2.261 | 494 | 2352 | 50.50 | $1^7T_{1g}$ | 46.93 | $1^7T_{2g}$ |       |             |  |  |
| 2                 | $A_{1g}$ | 2.259 | 498 | 2501 | 53.64 | $1^7A_{2g}$ | 43.69 | $1^7T_{1g}$ |       |             |  |  |
| 3                 | $T_{1g}$ | 2.261 | 495 | 3114 | 47.23 | $1^7T_{2g}$ | 36.02 | $1^7T_{1g}$ | 14.61 | $1^7A_{2g}$ |  |  |
| 3                 | $T_{2g}$ | 2.261 | 494 | 3361 | 78.93 | $1^7T_{1g}$ | 16.24 | $1^7T_{2g}$ |       |             |  |  |
| 2                 | $E_g$    | 2.262 | 494 | 3472 | 79.22 | $1^7T_{2g}$ | 18.74 | $1^7T_{1g}$ |       |             |  |  |
| 4                 | $T_{2g}$ | 2.261 | 496 | 4132 | 41.46 | $1^7T_{2g}$ | 34.92 | $1^7T_{1g}$ | 21.25 | $1^7A_{2g}$ |  |  |
| 4                 | $T_{1g}$ | 2.261 | 495 | 4404 | 75.39 | $1^7T_{2g}$ | 13.52 | $1^7T_{1g}$ |       |             |  |  |
| 3                 | $E_g$    | 2.261 | 494 | 4600 | 49.48 | $1^7T_{2g}$ | 48.17 | $1^7T_{1g}$ |       |             |  |  |
| 5                 | $T_{1g}$ | 2.261 | 494 | 4602 | 54.94 | $1^7T_{2g}$ | 42.53 | $1^7T_{1g}$ |       |             |  |  |
| 3                 | $A_{1g}$ | 2.261 | 495 | 5524 | 60.12 | $1^7T_{2g}$ | 23.43 | $1^7T_{1g}$ | 13.19 | $1^7A_{2g}$ |  |  |
| 6                 | $T_{1g}$ | 2.261 | 495 | 5580 | 54.28 | $1^7T_{2g}$ | 32.88 | $1^7T_{1g}$ |       |             |  |  |
| 5                 | $T_{2g}$ | 2.261 | 495 | 5603 | 48.97 | $1^7T_{1g}$ | 39.90 | $1^7T_{2g}$ |       |             |  |  |
| 4                 | $E_g$    | 2.261 | 494 | 5806 | 63.29 | $1^7T_{1g}$ | 33.36 | $1^7T_{2g}$ |       |             |  |  |
| 6                 | $T_{2g}$ | 2.261 | 494 | 5813 | 56.81 | $1^7T_{1g}$ | 39.80 | $1^7T_{2g}$ |       |             |  |  |
| 2                 | $A_{2g}$ | 2.261 | 494 | 5827 | 50.05 | $1^7T_{2g}$ | 46.56 | $1^7T_{1g}$ |       |             |  |  |

 $4f^6(^5D_{0-3})$



|    |          |       |     |       |       |             |       |             |       |             |       |             |
|----|----------|-------|-----|-------|-------|-------------|-------|-------------|-------|-------------|-------|-------------|
| 23 | $T_{1g}$ | 2.261 | 493 | 32115 | 52.58 | $3^5T_{1g}$ | 24.51 | $3^5T_{2g}$ |       |             |       |             |
| 25 | $T_{2g}$ | 2.261 | 493 | 32165 | 38.90 | $3^5T_{2g}$ | 22.62 | $4^5T_{2g}$ | 20.64 | $3^5T_{1g}$ |       |             |
| 17 | $E_g$    | 2.261 | 494 | 32402 | 33.48 | $4^5E_g$    | 26.82 | $4^5T_{2g}$ | 21.15 | $3^5T_{1g}$ | 15.72 | $3^5T_{2g}$ |
| 24 | $T_{1g}$ | 2.261 | 494 | 32429 | 41.42 | $4^5T_{2g}$ | 32.73 | $4^5E_g$    | 11.02 | $3^5T_{2g}$ |       |             |
| 26 | $T_{2g}$ | 2.261 | 494 | 32452 | 41.88 | $4^5T_{2g}$ | 28.97 | $3^5T_{2g}$ | 18.88 | $4^5E_g$    |       |             |
| 11 | $A_{1g}$ | 2.262 | 493 | 32458 | 52.98 | $4^5T_{2g}$ | 32.54 | $4^5E_g$    |       |             |       |             |

<sup>a</sup> Absorption oscillator strengths for  $1\ \Gamma_{6u,8u,7u} \rightarrow i$  transitions are calculated at  $d_{\text{Eu-F}} = 2.400\ \text{\AA}$ ; the reference value is  $f_{ref} = 1.704 \times 10^{-2}$ . Emission oscillator strengths for  $1\ \Gamma_{8g} \rightarrow 1\ \Gamma_{6u,1}\ \Gamma_{8u,1}\ \Gamma_{7u}$  and radiative emission lifetime are calculated at  $d_{\text{Eu-F}} = 2.350\ \text{\AA}$ ; the reference value is  $f_{ref} = 2.233 \times 10^{-3}$ .

<sup>b</sup> The analyses of the wave functions have been done at  $d_{\text{Eu-F}} = 2.400\ \text{\AA}$  ( $4f^7$ ),  $2.350\ \text{\AA}$  ( $4f^6(5d^1 + ITE_{\alpha_{1g}}^1)$ ),  $2.250\ \text{\AA}$  ( $4f^6$ ).

<sup>c</sup> C.f. Table S7.

<sup>d</sup> C.f. Table S8.

<sup>e</sup> Low-spin ( $S = 5/2$ ) wave functions of the  $4f^6(^7F_J)(5dt_{2g}^1 + ITE_{\alpha_{1g}}^1)$  configurations have not been included in the spin-orbit calculations.

TABLE S10: Spectroscopic constants and analyses of the spin-orbit wave functions of the ground and lowest lying excited states of  $\text{Eu}^{2+}$  and  $\text{Eu}^{3+}$ -doped  $\text{SrF}_2$  cubic defects. Eu-F bond distances ( $d_{\text{Eu-F},e}$  in Å),  $\text{EuF}_8$  breathing mode harmonic vibrational frequencies ( $\omega_{a_{1g}}$  in  $\text{cm}^{-1}$ ), minimum-to-minimum energy differences ( $T_e$  in  $\text{cm}^{-1}$ ), and relative absorption and emission oscillator strengths ( $f_i^{abs}/f_{ref}$  and  $f_i^{emi}/f_{ref}$ ) are given. Calculated radiative emission lifetime for the  $4f^6(^7F_J)5de_g^1 - 1\Gamma_{8g}$  excited state is  $0.498 \mu\text{s}$ . Local distortion around the  $\text{Eu}^{2+}$  impurity, relative to experimental crystal structure  $d_{\text{Sr-F}} = 2.510 \text{ \AA}$ , is  $d_{\text{Eu-F},e}(1\Gamma_{6u}) - d_{\text{Ca-F}} = -0.040$ ; ionic radii mismatch is  $-0.01 \text{ \AA}^{31}$ . See Fig. 3, S3 and text for details.

| State                                                | $d_{\text{Eu-F},e}$ | $\omega_{a_{1g}}$ | $T_e$ | $f_i^{abs}/f_{ref}$ <sup>a</sup> | $f_i^{emi}/f_{ref}$ <sup>a</sup> | weights of terms larger than 10% <sup>b</sup> |              |       |              |       |              |
|------------------------------------------------------|---------------------|-------------------|-------|----------------------------------|----------------------------------|-----------------------------------------------|--------------|-------|--------------|-------|--------------|
| $4f^7(^8S_{7/2})$ <sup>c</sup>                       |                     |                   |       |                                  |                                  |                                               |              |       |              |       |              |
| 1 $\Gamma_{6u}$                                      | 2.470               | 370               | 0     | 1.00                             | 1.00                             | 97.78                                         | 1 $^8A_{1u}$ |       |              |       |              |
| 1 $\Gamma_{8u}$                                      | 2.470               | 370               | 0     | 0.86                             | 0.86                             | 97.77                                         | 1 $^8A_{1u}$ |       |              |       |              |
| 1 $\Gamma_{7u}$                                      | 2.470               | 370               | 0     | 0.03                             | 0.03                             | 97.77                                         | 1 $^8A_{1u}$ |       |              |       |              |
| $4f^6(5d + IT E_{a_{1g}})^1$ excited states          |                     |                   |       |                                  |                                  |                                               |              |       |              |       |              |
| $4f^6(^7F_J)5de_g^1$ High-Spin coupling <sup>d</sup> |                     |                   |       |                                  |                                  |                                               |              |       |              |       |              |
| 1 $\Gamma_{8g}$                                      | 2.451               | 370               | 26828 | 1.00                             |                                  | 50.73                                         | 1 $^8T_{2g}$ | 33.29 | 1 $^8T_{1g}$ | 10.05 | 1 $^8E_g$    |
| 1 $\Gamma_{7g}$                                      | 2.451               | 370               | 27002 | 0.53                             |                                  | 55.50                                         | 1 $^8T_{2g}$ | 35.36 | 1 $^8T_{1g}$ |       |              |
| 2 $\Gamma_{8g}$                                      | 2.451               | 371               | 27118 | 0.10                             |                                  | 69.49                                         | 1 $^8T_{2g}$ | 18.65 | 1 $^8E_g$    |       |              |
| 2 $\Gamma_{7g}$                                      | 2.451               | 369               | 27523 | 0.75                             |                                  | 45.07                                         | 1 $^8T_{1g}$ | 39.44 | 1 $^8T_{2g}$ | 11.79 | 1 $^8E_g$    |
| 3 $\Gamma_{8g}$                                      | 2.451               | 370               | 27814 | 1.01                             |                                  | 35.29                                         | 1 $^8T_{2g}$ | 29.06 | 1 $^8T_{1g}$ | 26.15 | 1 $^8E_g$    |
| 1 $\Gamma_{6g}$                                      | 2.451               | 371               | 27939 | 0.38                             |                                  | 30.40                                         | 1 $^8T_{2g}$ | 27.31 | 1 $^8E_g$    | 22.73 | 1 $^8T_{1g}$ |
| 4 $\Gamma_{8g}$                                      | 2.451               | 369               | 28437 | 2.01                             |                                  | 54.31                                         | 1 $^8T_{1g}$ | 20.24 | 1 $^8T_{2g}$ | 13.31 | 2 $^8T_{1g}$ |
| 2 $\Gamma_{6g}$                                      | 2.451               | 370               | 28515 | 0.27                             |                                  | 33.46                                         | 1 $^8T_{2g}$ | 20.97 | 1 $^8E_g$    | 19.98 | 2 $^8T_{1g}$ |
| 5 $\Gamma_{8g}$                                      | 2.450               | 374               | 28670 | 0.23                             |                                  | 47.41                                         | 1 $^8E_g$    | 30.90 | 2 $^8T_{1g}$ | 15.87 | 1 $^8T_{2g}$ |
| 3 $\Gamma_{7g}$                                      | 2.451               | 369               | 28745 | 0.83                             |                                  | 42.89                                         | 1 $^8T_{1g}$ | 28.29 | 1 $^8E_g$    | 23.69 | 1 $^8T_{2g}$ |
| 6 $\Gamma_{8g}$                                      | 2.450               | 370               | 28944 | 0.45                             |                                  | 35.40                                         | 1 $^8E_g$    | 32.83 | 1 $^8T_{2g}$ | 12.78 | 1 $^8T_{1g}$ |
| 7 $\Gamma_{8g}$                                      | 2.451               | 371               | 29333 | 0.72                             |                                  | 41.26                                         | 2 $^8T_{1g}$ | 22.86 | 1 $^8T_{1g}$ | 17.94 | 1 $^8T_{2g}$ |
| 3 $\Gamma_{6g}$                                      | 2.451               | 367               | 29343 | 0.70                             |                                  | 46.69                                         | 1 $^8T_{1g}$ | 20.47 | 2 $^8T_{1g}$ | 18.55 | 2 $^8T_{2g}$ |
| 8 $\Gamma_{8g}$                                      | 2.451               | 370               | 29858 | 1.70                             |                                  | 47.14                                         | 1 $^8T_{1g}$ | 26.11 | 2 $^8T_{1g}$ | 14.79 | 1 $^8T_{2g}$ |
| 9 $\Gamma_{8g}$                                      | 2.450               | 369               | 29974 | 0.54                             |                                  | 24.00                                         | 1 $^8E_g$    | 23.47 | 1 $^8T_{2g}$ | 19.35 | 1 $^8T_{1g}$ |
|                                                      |                     |                   |       |                                  |                                  | 14.81                                         | 2 $^8T_{2g}$ |       |              |       |              |
| 4 $\Gamma_{7g}$                                      | 2.450               | 368               | 30017 | 0.76                             |                                  | 37.84                                         | 1 $^8T_{1g}$ | 24.01 | 1 $^8T_{2g}$ | 20.17 | 1 $^8E_g$    |
| 4 $\Gamma_{6g}$                                      | 2.451               | 373               | 30038 | 0.31                             |                                  | 31.70                                         | 2 $^8T_{1g}$ | 25.22 | 1 $^8T_{2g}$ | 22.35 | 2 $^8T_{2g}$ |
| 5 $\Gamma_{7g}$                                      | 2.451               | 371               | 30127 | 0.82                             |                                  | 34.85                                         | 1 $^8T_{2g}$ | 27.01 | 2 $^8T_{1g}$ | 26.83 | 1 $^8T_{1g}$ |
| 5 $\Gamma_{6g}$                                      | 2.450               | 372               | 30395 | 0.08                             |                                  | 47.46                                         | 2 $^8T_{2g}$ | 27.99 | 1 $^8T_{2g}$ | 13.20 | 2 $^8T_{1g}$ |
| 10 $\Gamma_{8g}$                                     | 2.450               | 371               | 30414 | 0.03                             |                                  | 56.07                                         | 2 $^8T_{2g}$ | 22.77 | 1 $^8E_g$    | 14.36 | 1 $^8T_{2g}$ |
| 11 $\Gamma_{8g}$                                     | 2.451               | 367               | 30688 | 0.96                             |                                  | 32.93                                         | 1 $^8T_{2g}$ | 26.47 | 1 $^8T_{1g}$ | 20.06 | 1 $^8E_g$    |
| 6 $\Gamma_{6g}$                                      | 2.451               | 368               | 30689 | 0.55                             |                                  | 36.39                                         | 1 $^8T_{2g}$ | 24.47 | 2 $^8T_{2g}$ | 18.20 | 1 $^8T_{1g}$ |
| 13 $\Gamma_{8g}$                                     | 2.450               | 381               | 31077 | 0.51                             |                                  | 21.92                                         | 2 $^8T_{1g}$ | 21.81 | 1 $^8E_g$    | 20.95 | 1 $^8T_{2g}$ |
| 6 $\Gamma_{7g}$                                      | 2.451               | 372               | 31147 | 0.01                             |                                  | 55.97                                         | 2 $^8T_{1g}$ | 16.98 | 2 $^8T_{2g}$ | 13.35 | 1 $^8T_{2g}$ |
| 14 $\Gamma_{8g}$                                     | 2.451               | 371               | 31388 | 1.39                             |                                  | 41.83                                         | 2 $^8T_{1g}$ | 27.20 | 1 $^8T_{1g}$ | 15.09 | 2 $^8T_{2g}$ |
| 7 $\Gamma_{7g}$                                      | 2.450               | 366               | 31839 |                                  |                                  | 72.69                                         | 2 $^8T_{2g}$ | 14.43 | 1 $^8E_g$    |       |              |
| 15 $\Gamma_{8g}$                                     | 2.451               | 366               | 31865 | 3.21                             |                                  | 67.43                                         | 1 $^8T_{1g}$ | 23.73 | 1 $^8T_{2g}$ |       |              |
| 7 $\Gamma_{6g}$                                      | 2.451               | 366               | 31882 | 1.73                             |                                  | 71.87                                         | 1 $^8T_{1g}$ | 22.50 | 1 $^8T_{2g}$ |       |              |
| 16 $\Gamma_{8g}$                                     | 2.450               | 368               | 32006 | 0.77                             |                                  | 59.23                                         | 2 $^8T_{2g}$ | 18.93 | 2 $^8T_{1g}$ | 10.34 | 1 $^8T_{1g}$ |
| 8 $\Gamma_{6g}$                                      | 2.450               | 367               | 32137 | 0.11                             |                                  | 56.55                                         | 2 $^8T_{2g}$ | 27.99 | 2 $^8T_{1g}$ |       |              |
| 18 $\Gamma_{8g}$                                     | 2.451               | 374               | 32371 | 1.36                             |                                  | 43.64                                         | 2 $^8T_{1g}$ | 21.54 | 1 $^8T_{1g}$ | 19.36 | 1 $^8E_g$    |
| 9 $\Gamma_{6g}$                                      | 2.451               | 373               | 32430 | 0.05                             |                                  | 53.86                                         | 2 $^8T_{1g}$ | 17.53 | 2 $^8T_{2g}$ | 14.28 | 1 $^8E_g$    |
| 19 $\Gamma_{8g}$                                     | 2.451               | 378               | 32721 | 0.17                             |                                  | 68.10                                         | 2 $^8T_{1g}$ | 12.15 | 1 $^8E_g$    |       |              |
| 9 $\Gamma_{7g}$                                      | 2.451               | 378               | 32869 |                                  |                                  | 76.07                                         | 2 $^8T_{1g}$ |       |              |       |              |
| 20 $\Gamma_{8g}$                                     | 2.450               | 362               | 33686 | 0.02                             |                                  | 87.94                                         | 2 $^8T_{2g}$ |       |              |       |              |
| 21 $\Gamma_{8g}$                                     | 2.450               | 365               | 33854 | 0.01                             |                                  | 79.78                                         | 2 $^8T_{2g}$ | 17.93 | 2 $^8T_{1g}$ |       |              |
| 10 $\Gamma_{7g}$                                     | 2.450               | 366               | 33887 |                                  |                                  | 80.82                                         | 2 $^8T_{2g}$ | 17.32 | 2 $^8T_{1g}$ |       |              |
| $4f^6(^7F_J)5de_g^1$ Low-Spin coupling <sup>d</sup>  |                     |                   |       |                                  |                                  |                                               |              |       |              |       |              |
| 12 $\Gamma_{8g}$                                     | 2.452               | 370               | 30901 | 0.11                             |                                  | 85.87                                         | 1 $^6T_{1g}$ |       |              |       |              |
| 8 $\Gamma_{7g}$                                      | 2.451               | 367               | 32158 | 0.02                             |                                  | 85.15                                         | 1 $^6T_{1g}$ | 11.55 | 1 $^6T_{2g}$ |       |              |
| 17 $\Gamma_{8g}$                                     | 2.451               | 367               | 32252 | 0.06                             |                                  | 88.33                                         | 1 $^6T_{1g}$ |       |              |       |              |

|    |               |       |     |       |      |       |             |       |             |       |             |       |             |
|----|---------------|-------|-----|-------|------|-------|-------------|-------|-------------|-------|-------------|-------|-------------|
| 10 | $\Gamma_{6g}$ | 2.450 | 368 | 33832 | 0.03 | 54.30 | $1^6T_{1g}$ | 31.21 | $1^6T_{2g}$ | 12.44 | $2^6T_{1g}$ |       |             |
| 22 | $\Gamma_{8g}$ | 2.450 | 371 | 33961 | 0.05 | 58.37 | $1^6T_{1g}$ | 29.62 | $1^6T_{2g}$ | 10.08 | $2^6T_{1g}$ |       |             |
| 11 | $\Gamma_{7g}$ | 2.450 | 370 | 34259 | 0.03 | 77.91 | $1^6T_{1g}$ | 11.15 | $1^6T_{2g}$ |       |             |       |             |
| 11 | $\Gamma_{6g}$ | 2.447 | 357 | 34534 | 0.01 | 57.84 | $1^6T_{2g}$ | 24.77 | $1^6E_g$    | 13.90 | $1^6T_{1g}$ |       |             |
| 23 | $\Gamma_{8g}$ | 2.448 | 356 | 34767 | 0.02 | 24.97 | $1^6E_g$    | 24.79 | $1^6T_{1g}$ | 22.25 | $1^6T_{2g}$ | 21.24 | $2^6T_{1g}$ |
| 12 | $\Gamma_{7g}$ | 2.448 | 361 | 34870 | 0.01 | 48.86 | $2^6T_{1g}$ | 22.09 | $1^6E_g$    | 20.11 | $1^6T_{2g}$ |       |             |
| 24 | $\Gamma_{8g}$ | 2.448 | 358 | 35399 | 0.01 | 31.41 | $2^6T_{1g}$ | 27.99 | $1^6T_{2g}$ | 26.34 | $1^6E_g$    |       |             |
| 13 | $\Gamma_{7g}$ | 2.450 | 368 | 35513 |      | 39.40 | $1^6T_{2g}$ | 34.02 | $2^6T_{1g}$ | 18.70 | $1^6T_{1g}$ |       |             |
| 12 | $\Gamma_{6g}$ | 2.450 | 364 | 35519 | 0.01 | 63.14 | $2^6T_{1g}$ | 15.72 | $1^6T_{1g}$ | 10.57 | $1^6T_{2g}$ |       |             |
| 25 | $\Gamma_{8g}$ | 2.448 | 362 | 36109 | 0.03 | 43.09 | $2^6T_{1g}$ | 21.93 | $1^6E_g$    | 20.42 | $1^6T_{2g}$ | 11.12 | $2^6T_{2g}$ |
| 26 | $\Gamma_{8g}$ | 2.449 | 355 | 36219 | 0.01 | 52.99 | $1^6T_{2g}$ | 14.67 | $2^6T_{1g}$ | 14.14 | $1^6E_g$    | 11.94 | $1^6T_{1g}$ |
| 27 | $\Gamma_{8g}$ | 2.448 | 355 | 36935 | 0.03 | 32.35 | $1^6E_g$    | 30.17 | $1^6T_{2g}$ | 24.65 | $2^6T_{1g}$ |       |             |
| 13 | $\Gamma_{6g}$ | 2.448 | 363 | 36971 | 0.02 | 44.55 | $1^6T_{2g}$ | 33.82 | $1^6E_g$    | 12.07 | $1^6T_{1g}$ |       |             |
| 14 | $\Gamma_{7g}$ | 2.449 | 362 | 37123 |      | 64.14 | $2^6T_{1g}$ | 13.19 | $1^6T_{2g}$ | 11.34 | $1^6E_g$    |       |             |
| 28 | $\Gamma_{8g}$ | 2.449 | 374 | 37266 | 0.01 | 82.32 | $2^6T_{2g}$ | 10.01 | $2^6T_{1g}$ |       |             |       |             |
| 14 | $\Gamma_{6g}$ | 2.448 | 362 | 37481 | 0.04 | 52.17 | $1^6T_{2g}$ | 29.96 | $1^6E_g$    |       |             |       |             |
| 29 | $\Gamma_{8g}$ | 2.448 | 351 | 37667 | 0.06 | 68.12 | $1^6T_{2g}$ | 20.72 | $2^6T_{1g}$ |       |             |       |             |
| 15 | $\Gamma_{7g}$ | 2.447 | 365 | 38213 |      | 50.54 | $1^6E_g$    | 39.33 | $2^6T_{1g}$ |       |             |       |             |
| 30 | $\Gamma_{8g}$ | 2.448 | 364 | 38568 | 0.06 | 36.43 | $2^6T_{1g}$ | 35.51 | $1^6E_g$    | 25.00 | $1^6T_{2g}$ |       |             |
| 31 | $\Gamma_{8g}$ | 2.448 | 367 | 38720 | 0.04 | 36.34 | $2^6T_{1g}$ | 28.66 | $2^6T_{2g}$ | 24.75 | $1^6E_g$    |       |             |
| 15 | $\Gamma_{6g}$ | 2.449 | 376 | 38746 |      | 84.66 | $2^6T_{2g}$ | 10.90 | $2^6T_{1g}$ |       |             |       |             |
| 32 | $\Gamma_{8g}$ | 2.450 | 372 | 38763 |      | 54.76 | $2^6T_{2g}$ | 40.04 | $2^6T_{1g}$ |       |             |       |             |
| 16 | $\Gamma_{6g}$ | 2.448 | 376 | 40510 | 0.01 | 90.84 | $2^6T_{2g}$ |       |             |       |             |       |             |
| 33 | $\Gamma_{8g}$ | 2.448 | 373 | 40526 |      | 90.22 | $2^6T_{2g}$ |       |             |       |             |       |             |
| 16 | $\Gamma_{7g}$ | 2.448 | 371 | 40535 |      | 89.83 | $2^6T_{2g}$ |       |             |       |             |       |             |

 $4f^6(^7F_J)(5dt_{2g}^1 + ITE_{a_{1g}}^1)$  High-Spin coupling <sup>d,e</sup>

|    |               |       |     |       |      |       |             |       |             |       |             |       |             |
|----|---------------|-------|-----|-------|------|-------|-------------|-------|-------------|-------|-------------|-------|-------------|
| 34 | $\Gamma_{8g}$ | 2.502 | 504 | 44056 | 0.50 | 46.30 | $3^8T_{1g}$ | 25.83 | $2^8E_g$    | 19.33 | $3^8T_{2g}$ |       |             |
| 35 | $\Gamma_{8g}$ | 2.502 | 469 | 44243 | 0.24 | 35.64 | $3^8T_{2g}$ | 35.14 | $3^8T_{1g}$ | 22.01 | $2^8E_g$    |       |             |
| 17 | $\Gamma_{7g}$ | 2.502 | 494 | 44740 | 0.58 | 63.92 | $3^8T_{2g}$ | 13.63 | $4^8T_{1g}$ | 12.39 | $2^8E_g$    |       |             |
| 17 | $\Gamma_{6g}$ | 2.501 | 620 | 44760 | 0.21 | 59.34 | $3^8T_{1g}$ | 19.02 | $2^8E_g$    | 10.64 | $3^8T_{2g}$ |       |             |
| 36 | $\Gamma_{8g}$ | 2.502 | 466 | 44823 | 0.71 | 42.38 | $3^8T_{2g}$ | 32.71 | $2^8E_g$    | 18.44 | $3^8T_{1g}$ |       |             |
| 18 | $\Gamma_{7g}$ | 2.502 | 469 | 45306 | 1.20 | 40.42 | $3^8T_{2g}$ | 29.59 | $2^8E_g$    | 18.80 | $4^8T_{1g}$ |       |             |
| 18 | $\Gamma_{6g}$ | 2.502 | 507 | 45358 | 0.47 | 51.12 | $3^8T_{1g}$ | 33.12 | $2^8E_g$    |       |             |       |             |
| 37 | $\Gamma_{8g}$ | 2.502 | 514 | 45468 | 0.78 | 46.01 | $3^8T_{2g}$ | 34.49 | $3^8T_{1g}$ |       |             |       |             |
| 38 | $\Gamma_{8g}$ | 2.502 | 540 | 45919 | 3.22 | 30.02 | $3^8T_{2g}$ | 29.83 | $3^8T_{1g}$ | 21.73 | $4^8T_{1g}$ | 15.52 | $2^8E_g$    |
| 39 | $\Gamma_{8g}$ | 2.502 | 499 | 46076 | 1.99 | 49.78 | $3^8T_{1g}$ | 16.96 | $3^8T_{2g}$ | 13.67 | $4^8T_{1g}$ | 13.64 | $2^8E_g$    |
| 40 | $\Gamma_{8g}$ | 2.502 | 511 | 46401 | 3.42 | 30.20 | $3^8T_{2g}$ | 21.67 | $4^8T_{1g}$ | 21.01 | $3^8T_{1g}$ |       |             |
| 19 | $\Gamma_{7g}$ | 2.502 | 546 | 46507 | 3.64 | 47.41 | $4^8T_{1g}$ | 32.28 | $3^8T_{1g}$ | 11.55 | $2^8E_g$    |       |             |
| 19 | $\Gamma_{6g}$ | 2.489 | 290 | 46689 | 0.03 | 39.30 | $4^8T_{2g}$ | 36.48 | $5^8T_{1g}$ |       |             |       |             |
| 20 | $\Gamma_{7g}$ | 2.501 | 529 | 46734 | 1.49 | 59.27 | $3^8T_{1g}$ | 25.89 | $3^8T_{2g}$ |       |             |       |             |
| 41 | $\Gamma_{8g}$ | 2.496 | 304 | 46873 | 0.94 | 31.91 | $4^8T_{2g}$ | 27.69 | $5^8T_{1g}$ |       |             |       |             |
| 20 | $\Gamma_{6g}$ | 2.498 | 357 | 47181 | 0.69 | 53.99 | $3^8T_{2g}$ | 21.73 | $3^8T_{1g}$ | 19.61 | $4^8T_{1g}$ |       |             |
| 21 | $\Gamma_{7g}$ | 2.490 | 317 | 47312 | 0.02 | 44.19 | $4^8T_{2g}$ |       |             |       |             |       |             |
| 42 | $\Gamma_{8g}$ | 2.493 | 302 | 47316 | 2.22 | 25.58 | $2^8E_g$    | 24.29 | $4^8T_{1g}$ | 13.41 | $5^8T_{1g}$ | 13.39 | $3^8T_{2g}$ |
|    |               |       |     |       |      | 11.97 | $3^8T_{1g}$ |       |             |       |             |       |             |
| 21 | $\Gamma_{6g}$ | 2.500 | 490 | 47446 | 0.30 | 23.18 | $3^8T_{2g}$ | 14.91 | $3^8T_{1g}$ | 13.57 | $6^8T_{1g}$ | 11.50 | $4^8T_{1g}$ |
|    |               |       |     |       |      | 10.06 | $3^8E_g$    |       |             |       |             |       |             |
| 22 | $\Gamma_{7g}$ | 2.501 | 365 | 47534 | 1.01 | 27.13 | $3^8T_{1g}$ | 25.72 | $4^8T_{1g}$ | 16.95 | $2^8E_g$    | 14.34 | $3^8T_{2g}$ |
| 43 | $\Gamma_{8g}$ | 2.489 | 300 | 47567 | 0.70 | 42.84 | $5^8T_{1g}$ | 26.33 | $4^8T_{2g}$ |       |             |       |             |
| 44 | $\Gamma_{8g}$ | 2.491 | 299 | 47857 | 0.18 | 19.29 | $4^8T_{1g}$ | 13.34 | $6^8T_{1g}$ | 12.96 | $3^8T_{1g}$ | 11.35 | $3^8E_g$    |
| 22 | $\Gamma_{6g}$ | 2.498 | 320 | 47894 | 0.35 | 40.07 | $3^8T_{2g}$ | 19.56 | $3^8E_g$    | 10.31 | $6^8T_{1g}$ |       |             |
| 45 | $\Gamma_{8g}$ | 2.498 | 313 | 47944 | 0.13 | 27.81 | $5^8T_{1g}$ | 15.59 | $4^8T_{2g}$ |       |             |       |             |
| 23 | $\Gamma_{7g}$ | 2.491 | 314 | 47992 | 0.07 | 24.29 | $5^8T_{1g}$ | 14.04 | $4^8T_{2g}$ | 11.78 | $3^8E_g$    | 11.01 | $5^8T_{2g}$ |
| 46 | $\Gamma_{8g}$ | 2.499 | 342 | 48025 | 1.64 | 22.28 | $2^8E_g$    | 21.24 | $3^8T_{2g}$ | 14.92 | $5^8T_{1g}$ | 11.56 | $4^8T_{1g}$ |
| 23 | $\Gamma_{6g}$ | 2.488 | 307 | 48222 | 0.34 | 40.41 | $4^8T_{2g}$ | 33.64 | $5^8T_{1g}$ |       |             |       |             |
| 47 | $\Gamma_{8g}$ | 2.500 | 372 | 48273 | 4.35 | 30.24 | $4^8T_{1g}$ | 23.48 | $2^8E_g$    | 20.24 | $3^8T_{1g}$ |       |             |
| 48 | $\Gamma_{8g}$ | 2.494 | 310 | 48408 | 1.87 | 23.98 | $3^8E_g$    | 21.79 | $4^8T_{1g}$ | 15.25 | $6^8T_{1g}$ | 13.27 | $5^8T_{2g}$ |
| 24 | $\Gamma_{7g}$ | 2.470 | 370 | 48510 | 0.15 | 24.20 | $4^8T_{2g}$ | 24.20 | $5^8T_{1g}$ | 13.72 | $5^8T_{2g}$ | 11.70 | $3^8E_g$    |
| 24 | $\Gamma_{6g}$ | 2.464 | 391 | 48696 | 3.37 | 46.82 | $4^8T_{1g}$ | 18.86 | $2^8E_g$    | 15.75 | $3^8T_{1g}$ |       |             |
| 25 | $\Gamma_{7g}$ | 2.470 | 367 | 48804 | 1.31 | 36.91 | $4^8T_{1g}$ | 14.00 | $3^8T_{2g}$ | 11.13 | $6^8T_{1g}$ | 10.72 | $4^8T_{2g}$ |
| 49 | $\Gamma_{8g}$ | 2.470 | 355 | 48834 | 0.54 | 32.60 | $3^8T_{2g}$ | 16.89 | $2^8E_g$    | 12.86 | $5^8T_{2g}$ |       |             |

|    |               |       |      |       |      |       |             |       |             |       |             |       |             |
|----|---------------|-------|------|-------|------|-------|-------------|-------|-------------|-------|-------------|-------|-------------|
| 50 | $\Gamma_{8g}$ | 2.479 | 319  | 48993 | 0.55 | 19.97 | $5^8T_{2g}$ | 17.92 | $3^8E_g$    | 16.16 | $3^8T_{2g}$ |       |             |
| 25 | $\Gamma_{6g}$ | 2.471 | 349  | 49010 | 0.17 | 22.80 | $4^8T_{2g}$ | 20.29 | $5^8T_{1g}$ | 18.77 | $5^8T_{2g}$ |       |             |
| 51 | $\Gamma_{8g}$ | 2.479 | 318  | 49091 | 2.25 | 24.14 | $4^8T_{1g}$ | 17.55 | $3^8E_g$    | 13.87 | $3^8T_{2g}$ | 12.52 | $3^8T_{1g}$ |
|    |               |       |      |       |      | 11.33 | $2^8E_g$    |       |             |       |             |       |             |
| 26 | $\Gamma_{6g}$ | 2.483 | 335  | 49179 | 0.11 | 22.92 | $5^8T_{2g}$ | 16.08 | $5^8T_{1g}$ |       |             |       |             |
| 52 | $\Gamma_{8g}$ | 2.486 | 306  | 49246 | 0.10 | 40.80 | $4^8T_{2g}$ | 25.11 | $5^8T_{1g}$ |       |             |       |             |
| 26 | $\Gamma_{7g}$ | 2.494 | 305  | 49294 | 1.20 | 31.15 | $6^8T_{1g}$ | 14.51 | $4^8T_{1g}$ |       |             |       |             |
| 53 | $\Gamma_{8g}$ | 2.478 | 323  | 49409 | 0.05 | 43.62 | $5^8T_{1g}$ | 37.04 | $4^8T_{2g}$ | 10.73 | $6^8T_{1g}$ |       |             |
| 27 | $\Gamma_{6g}$ | 2.489 | 363  | 49554 | 0.16 | 42.52 | $3^8T_{2g}$ | 20.70 | $2^8E_g$    | 11.48 | $3^8T_{1g}$ |       |             |
| 54 | $\Gamma_{8g}$ | 2.493 | 314  | 49576 | 0.71 | 21.99 | $3^8T_{2g}$ | 19.08 | $3^8T_{1g}$ | 17.70 | $2^8E_g$    | 13.91 | $4^8T_{1g}$ |
| 55 | $\Gamma_{8g}$ | 2.489 | 354  | 49643 | 0.26 | 18.38 | $6^8T_{1g}$ | 18.31 | $5^8T_{2g}$ | 13.28 | $3^8E_g$    |       |             |
| 27 | $\Gamma_{7g}$ | 2.471 | 331  | 49821 | 0.13 | 22.62 | $3^8T_{1g}$ | 12.52 | $4^8T_{1g}$ | 10.89 | $5^8T_{2g}$ |       |             |
| 56 | $\Gamma_{8g}$ | 2.474 | 350  | 49930 | 1.76 | 30.89 | $3^8E_g$    | 21.75 | $5^8T_{2g}$ | 18.47 | $4^8T_{1g}$ | 10.59 | $4^8T_{2g}$ |
| 57 | $\Gamma_{8g}$ | 2.475 | 363  | 49992 | 4.94 | 47.03 | $4^8T_{1g}$ |       |             |       |             |       |             |
| 28 | $\Gamma_{6g}$ | 2.475 | 335  | 50026 | 0.26 | 46.06 | $5^8T_{2g}$ |       |             |       |             |       |             |
| 28 | $\Gamma_{7g}$ | 2.462 | 346  | 50187 | 0.13 | 29.98 | $3^8E_g$    | 14.76 | $3^8T_{1g}$ | 10.78 | $3^8T_{2g}$ | 10.37 | $2^8E_g$    |
| 58 | $\Gamma_{8g}$ | 2.474 | 409  | 50202 | 5.92 | 43.29 | $4^8T_{1g}$ | 11.18 | $6^8T_{1g}$ |       |             |       |             |
| 29 | $\Gamma_{6g}$ | 2.476 | 415  | 50202 | 3.68 | 67.91 | $4^8T_{1g}$ | 12.96 | $3^8T_{2g}$ |       |             |       |             |
| 59 | $\Gamma_{8g}$ | 2.471 | 410  | 50408 | 4.77 | 35.24 | $4^8T_{1g}$ | 14.99 | $5^8T_{2g}$ | 12.28 | $6^8T_{1g}$ | 10.38 | $4^8T_{2g}$ |
| 29 | $\Gamma_{7g}$ | 2.466 | 392  | 50446 | 0.07 | 39.25 | $5^8T_{1g}$ | 20.64 | $4^8T_{2g}$ |       |             |       |             |
| 60 | $\Gamma_{8g}$ | 2.470 | 413  | 50496 | 0.26 | 42.35 | $4^8T_{2g}$ | 26.68 | $5^8T_{1g}$ |       |             |       |             |
| 30 | $\Gamma_{6g}$ | 2.471 | 400  | 50581 | 0.13 | 53.84 | $5^8T_{1g}$ | 31.26 | $4^8T_{2g}$ |       |             |       |             |
| 61 | $\Gamma_{8g}$ | 2.458 | 460  | 50718 | 0.06 | 40.64 | $4^8T_{2g}$ | 27.35 | $5^8T_{2g}$ | 23.21 | $5^8T_{1g}$ |       |             |
| 30 | $\Gamma_{7g}$ | 2.493 | 453  | 50854 | 0.04 | 54.71 | $5^8T_{2g}$ |       |             |       |             |       |             |
| 31 | $\Gamma_{6g}$ | 2.462 | 438  | 51068 | 0.15 | 26.85 | $3^8E_g$    | 24.31 | $5^8T_{2g}$ | 17.83 | $6^8T_{1g}$ |       |             |
| 62 | $\Gamma_{8g}$ | 2.459 | 438  | 51118 | 0.42 | 33.58 | $5^8T_{2g}$ | 33.38 | $6^8T_{1g}$ |       |             |       |             |
| 32 | $\Gamma_{6g}$ | 2.466 | 458  | 51232 | 0.35 | 27.51 | $6^8T_{1g}$ | 11.92 | $3^8E_g$    |       |             |       |             |
| 63 | $\Gamma_{8g}$ | 2.462 | 410  | 51345 | 0.24 | 33.62 | $5^8T_{2g}$ | 13.25 | $3^8E_g$    |       |             |       |             |
| 31 | $\Gamma_{7g}$ | 2.484 | 358  | 51431 | 0.23 | 24.97 | $6^8T_{1g}$ | 21.43 | $5^8T_{1g}$ | 19.29 | $3^8E_g$    | 10.32 | $4^8T_{2g}$ |
| 64 | $\Gamma_{8g}$ | 2.470 | 414  | 51529 | 0.33 | 43.48 | $5^8T_{2g}$ | 28.36 | $6^8T_{1g}$ | 11.90 | $5^8T_{1g}$ |       |             |
| 65 | $\Gamma_{8g}$ | 2.477 | 462  | 51676 | 0.06 | 40.14 | $4^8T_{2g}$ | 22.86 | $5^8T_{1g}$ | 14.04 | $5^8T_{2g}$ |       |             |
| 32 | $\Gamma_{7g}$ | 2.467 | 411  | 51937 | 0.03 | 34.82 | $4^8T_{2g}$ | 28.18 | $5^8T_{1g}$ | 11.97 | $5^8T_{2g}$ | 11.86 | $6^8T_{1g}$ |
| 33 | $\Gamma_{6g}$ | 2.462 | 436  | 52018 | 0.01 | 43.12 | $4^8T_{2g}$ | 16.08 | $6^8T_{1g}$ | 12.84 | $5^8T_{1g}$ |       |             |
| 66 | $\Gamma_{8g}$ | 2.468 | 439  | 52089 | 0.01 | 36.48 | $5^8T_{1g}$ | 33.13 | $6^8T_{1g}$ | 27.20 | $4^8T_{2g}$ |       |             |
| 33 | $\Gamma_{7g}$ | 2.462 | 486  | 52121 | 0.01 | 31.91 | $5^8T_{1g}$ | 28.61 | $6^8T_{1g}$ | 26.12 | $4^8T_{2g}$ |       |             |
| 67 | $\Gamma_{8g}$ | 2.465 | 500  | 52261 | 0.07 | 40.86 | $5^8T_{2g}$ | 17.69 | $3^8E_g$    | 10.98 | $6^8T_{1g}$ |       |             |
| 34 | $\Gamma_{6g}$ | 2.470 | 489  | 52499 | 0.05 | 39.88 | $5^8T_{2g}$ | 23.20 | $6^8T_{1g}$ |       |             |       |             |
| 68 | $\Gamma_{8g}$ | 2.470 | 490  | 52509 | 0.19 | 34.49 | $6^8T_{1g}$ | 29.95 | $5^8T_{2g}$ | 15.31 | $3^8E_g$    |       |             |
| 34 | $\Gamma_{7g}$ | 2.450 | 1067 | 52544 | 0.01 | 42.12 | $5^8T_{2g}$ | 14.21 | $3^8E_g$    |       |             |       |             |
| 69 | $\Gamma_{8g}$ | 2.453 | 756  | 52933 | 0.29 | 49.19 | $6^8T_{1g}$ | 24.61 | $3^8E_g$    | 13.51 | $5^8T_{2g}$ |       |             |
| 35 | $\Gamma_{7g}$ | 2.457 | 544  | 53291 | 0.10 | 46.47 | $6^8T_{1g}$ |       |             |       |             |       |             |
| 70 | $\Gamma_{8g}$ | 2.460 | 525  | 53468 | 0.24 | 50.13 | $6^8T_{1g}$ | 14.58 | $3^8E_g$    |       |             |       |             |
| 35 | $\Gamma_{6g}$ | 2.462 | 514  | 53482 | 0.12 | 49.73 | $6^8T_{1g}$ | 14.01 | $3^8E_g$    |       |             |       |             |

 $4f^7$  excited states $4f^7(^6P_{3/2,5/2,7/2})^c$ 

|   |               |       |     |       |  |       |             |       |             |  |  |  |  |
|---|---------------|-------|-----|-------|--|-------|-------------|-------|-------------|--|--|--|--|
| 2 | $\Gamma_{8u}$ | 2.469 | 369 | 30577 |  | 89.30 | $1^6T_{1u}$ |       |             |  |  |  |  |
| 2 | $\Gamma_{7u}$ | 2.469 | 369 | 30585 |  | 89.71 | $1^6T_{1u}$ |       |             |  |  |  |  |
| 3 | $\Gamma_{8u}$ | 2.469 | 369 | 30962 |  | 94.09 | $1^6T_{1u}$ |       |             |  |  |  |  |
| 2 | $\Gamma_{6u}$ | 2.469 | 369 | 31194 |  | 85.07 | $1^6T_{1u}$ | 12.14 | $3^6T_{2u}$ |  |  |  |  |
| 4 | $\Gamma_{8u}$ | 2.469 | 369 | 31205 |  | 85.15 | $1^6T_{1u}$ |       |             |  |  |  |  |
| 3 | $\Gamma_{7u}$ | 2.469 | 369 | 31222 |  | 85.28 | $1^6T_{1u}$ | 10.77 | $2^6E_u$    |  |  |  |  |

 $4f^7(^6I_{7/2,9/2,11/2,13/2,15/2,17/2})^c$ 

|   |               |       |     |       |  |       |             |       |             |  |  |  |  |
|---|---------------|-------|-----|-------|--|-------|-------------|-------|-------------|--|--|--|--|
| 3 | $\Gamma_{6u}$ | 2.468 | 369 | 34938 |  | 76.60 | $1^6T_{2u}$ | 20.28 | $1^6E_u$    |  |  |  |  |
| 5 | $\Gamma_{8u}$ | 2.468 | 369 | 34945 |  | 83.29 | $1^6T_{2u}$ | 13.36 | $1^6E_u$    |  |  |  |  |
| 4 | $\Gamma_{7u}$ | 2.468 | 369 | 34957 |  | 93.96 | $1^6T_{2u}$ |       |             |  |  |  |  |
| 6 | $\Gamma_{8u}$ | 2.468 | 370 | 34977 |  | 79.77 | $1^6T_{2u}$ | 13.87 | $1^6E_u$    |  |  |  |  |
| 4 | $\Gamma_{6u}$ | 2.468 | 370 | 34989 |  | 87.62 | $1^6T_{2u}$ |       |             |  |  |  |  |
| 7 | $\Gamma_{8u}$ | 2.468 | 370 | 34992 |  | 86.85 | $1^6T_{2u}$ |       |             |  |  |  |  |
| 5 | $\Gamma_{7u}$ | 2.468 | 370 | 35191 |  | 84.88 | $1^6E_u$    | 12.40 | $2^6T_{1u}$ |  |  |  |  |

|                                           |       |     |       |       |              |       |              |       |              |       |              |  |
|-------------------------------------------|-------|-----|-------|-------|--------------|-------|--------------|-------|--------------|-------|--------------|--|
| 8 $\Gamma_{8u}$                           | 2.468 | 370 | 35205 | 42.57 | $1^6 E_u$    | 29.43 | $2^6 T_{2u}$ | 23.88 | $1^6 A_{2u}$ |       |              |  |
| 9 $\Gamma_{8u}$                           | 2.468 | 370 | 35253 | 65.97 | $1^6 E_u$    | 14.31 | $2^6 T_{2u}$ | 11.10 | $1^6 T_{2u}$ |       |              |  |
| 5 $\Gamma_{6u}$                           | 2.468 | 369 | 35261 | 49.64 | $2^6 T_{2u}$ | 26.00 | $1^6 A_{2u}$ |       |              |       |              |  |
| 10 $\Gamma_{8u}$                          | 2.469 | 369 | 35310 | 72.77 | $2^6 T_{2u}$ | 23.19 | $2^6 T_{1u}$ |       |              |       |              |  |
| 6 $\Gamma_{7u}$                           | 2.469 | 369 | 35315 | 74.83 | $2^6 T_{2u}$ | 23.02 | $2^6 T_{1u}$ |       |              |       |              |  |
| 6 $\Gamma_{6u}$                           | 2.469 | 369 | 35317 | 72.55 | $2^6 T_{2u}$ | 12.43 | $2^6 T_{1u}$ |       |              |       |              |  |
| 11 $\Gamma_{8u}$                          | 2.469 | 369 | 35339 | 37.42 | $2^6 T_{1u}$ | 22.25 | $2^6 T_{2u}$ | 16.47 | $1^6 A_{1u}$ | 15.86 | $1^6 E_u$    |  |
| 12 $\Gamma_{8u}$                          | 2.469 | 369 | 35356 | 37.63 | $2^6 T_{2u}$ | 36.79 | $2^6 T_{1u}$ | 11.34 | $1^6 E_u$    |       |              |  |
| 7 $\Gamma_{6u}$                           | 2.469 | 369 | 35362 | 50.11 | $1^6 E_u$    | 30.90 | $2^6 T_{2u}$ |       |              |       |              |  |
| 7 $\Gamma_{7u}$                           | 2.469 | 369 | 35382 | 51.60 | $1^6 A_{1u}$ | 37.42 | $2^6 T_{1u}$ |       |              |       |              |  |
| 13 $\Gamma_{8u}$                          | 2.469 | 370 | 35405 | 26.57 | $1^6 A_{1u}$ | 17.32 | $1^6 E_u$    | 16.60 | $2^6 T_{2u}$ | 14.93 | $2^6 T_{1u}$ |  |
|                                           |       |     |       | 14.86 | $1^6 A_{2u}$ |       |              |       |              |       |              |  |
| 8 $\Gamma_{6u}$                           | 2.469 | 370 | 35414 | 48.77 | $1^6 A_{2u}$ | 25.38 | $2^6 T_{1u}$ | 12.30 | $1^6 E_u$    |       |              |  |
| 8 $\Gamma_{7u}$                           | 2.469 | 370 | 35442 | 66.68 | $2^6 T_{1u}$ | 16.51 | $1^6 A_{1u}$ |       |              |       |              |  |
| 14 $\Gamma_{8u}$                          | 2.469 | 369 | 35456 | 34.49 | $1^6 A_{2u}$ | 24.06 | $2^6 T_{2u}$ | 17.08 | $1^6 A_{1u}$ | 15.05 | $2^6 T_{1u}$ |  |
| 15 $\Gamma_{8u}$                          | 2.469 | 369 | 35499 | 65.34 | $2^6 T_{1u}$ | 20.75 | $2^6 T_{2u}$ | 10.18 | $1^6 A_{2u}$ |       |              |  |
| 16 $\Gamma_{8u}$                          | 2.469 | 369 | 35543 | 47.58 | $2^6 T_{1u}$ | 36.48 | $2^6 T_{2u}$ |       |              |       |              |  |
| 9 $\Gamma_{6u}$                           | 2.469 | 370 | 35590 | 45.95 | $2^6 T_{1u}$ | 36.19 | $2^6 T_{2u}$ | 15.29 | $1^6 A_{2u}$ |       |              |  |
| 17 $\Gamma_{8u}$                          | 2.469 | 369 | 35624 | 49.66 | $2^6 T_{1u}$ | 28.93 | $1^6 A_{1u}$ | 15.41 | $2^6 T_{2u}$ |       |              |  |
| 9 $\Gamma_{7u}$                           | 2.469 | 369 | 35633 | 56.70 | $2^6 T_{1u}$ | 30.46 | $1^6 A_{1u}$ | 10.94 | $2^6 T_{2u}$ |       |              |  |
| $4f^7(^6D_{1/2,3/2,5/2,7/2})^c$           |       |     |       |       |              |       |              |       |              |       |              |  |
| 18 $\Gamma_{8u}$                          | 2.468 | 369 | 37679 | 77.72 | $3^6 T_{2u}$ | 18.79 | $2^6 E_u$    |       |              |       |              |  |
| 10 $\Gamma_{6u}$                          | 2.468 | 370 | 37811 | 93.23 | $2^6 E_u$    |       |              |       |              |       |              |  |
| 19 $\Gamma_{8u}$                          | 2.469 | 369 | 37829 | 51.18 | $2^6 E_u$    | 45.39 | $3^6 T_{2u}$ |       |              |       |              |  |
| 11 $\Gamma_{6u}$                          | 2.469 | 369 | 38062 | 97.04 | $3^6 T_{2u}$ |       |              |       |              |       |              |  |
| 20 $\Gamma_{8u}$                          | 2.468 | 369 | 38276 | 51.08 | $3^6 T_{2u}$ | 40.14 | $2^6 E_u$    |       |              |       |              |  |
| 21 $\Gamma_{8u}$                          | 2.468 | 370 | 38489 | 64.56 | $2^6 E_u$    | 20.60 | $3^6 T_{2u}$ | 10.67 | $1^6 T_{1u}$ |       |              |  |
| 10 $\Gamma_{7u}$                          | 2.469 | 370 | 38557 | 80.77 | $2^6 E_u$    | 11.61 | $1^6 T_{1u}$ |       |              |       |              |  |
| 12 $\Gamma_{6u}$                          | 2.469 | 369 | 38667 | 80.48 | $3^6 T_{2u}$ | 12.16 | $1^6 T_{1u}$ |       |              |       |              |  |
| 22 $\Gamma_{8u}$                          | 2.469 | 369 | 38737 | 79.18 | $3^6 T_{2u}$ | 11.13 | $1^6 T_{1u}$ |       |              |       |              |  |
| 11 $\Gamma_{7u}$                          | 2.469 | 369 | 38798 | 84.06 | $3^6 T_{2u}$ | 10.59 | $1^6 T_{1u}$ |       |              |       |              |  |
| $4f^7(^6G_{3/2,5/2,7/2,9/2,11/2,13/2})^c$ |       |     |       |       |              |       |              |       |              |       |              |  |
| 23 $\Gamma_{8u}$                          | 2.466 | 369 | 48083 | 60.50 | $4^6 T_{2u}$ | 21.28 | $2^6 A_{2u}$ |       |              |       |              |  |
| 13 $\Gamma_{6u}$                          | 2.466 | 369 | 48106 | 59.69 | $4^6 T_{2u}$ | 21.71 | $2^6 A_{2u}$ |       |              |       |              |  |
| 24 $\Gamma_{8u}$                          | 2.467 | 369 | 48191 | 40.69 | $4^6 T_{2u}$ | 23.19 | $3^6 E_u$    | 20.98 | $3^6 T_{1u}$ |       |              |  |
| 14 $\Gamma_{6u}$                          | 2.467 | 370 | 48350 | 43.03 | $3^6 E_u$    | 36.43 | $5^6 T_{2u}$ | 10.70 | $4^6 T_{2u}$ |       |              |  |
| 12 $\Gamma_{7u}$                          | 2.467 | 369 | 48371 | 62.84 | $3^6 T_{1u}$ | 28.22 | $3^6 E_u$    |       |              |       |              |  |
| 15 $\Gamma_{6u}$                          | 2.467 | 369 | 48468 | 81.00 | $3^6 T_{1u}$ | 10.45 | $5^6 T_{2u}$ |       |              |       |              |  |
| 25 $\Gamma_{8u}$                          | 2.467 | 368 | 48473 | 54.96 | $3^6 T_{1u}$ | 21.61 | $5^6 T_{2u}$ | 12.63 | $4^6 T_{2u}$ |       |              |  |
| 26 $\Gamma_{8u}$                          | 2.468 | 370 | 48511 | 39.03 | $3^6 E_u$    | 18.21 | $5^6 T_{2u}$ | 11.12 | $2^6 A_{1u}$ |       |              |  |
| 13 $\Gamma_{7u}$                          | 2.467 | 369 | 48553 | 28.90 | $5^6 T_{2u}$ | 27.93 | $3^6 T_{1u}$ | 16.01 | $2^6 A_{1u}$ | 14.60 | $4^6 T_{2u}$ |  |
| 27 $\Gamma_{8u}$                          | 2.467 | 369 | 48689 | 37.40 | $4^6 T_{2u}$ | 20.31 | $3^6 E_u$    | 11.14 | $5^6 T_{2u}$ | 10.43 | $3^6 T_{1u}$ |  |
| 28 $\Gamma_{8u}$                          | 2.469 | 369 | 49042 | 79.28 | $4^6 T_{1u}$ | 10.21 | $3^6 T_{1u}$ |       |              |       |              |  |
| 14 $\Gamma_{7u}$                          | 2.470 | 369 | 49255 | 41.34 | $4^6 T_{1u}$ | 30.65 | $2^6 A_{1u}$ | 19.17 | $5^6 T_{2u}$ |       |              |  |
| 29 $\Gamma_{8u}$                          | 2.469 | 370 | 49618 | 27.90 | $2^6 A_{1u}$ | 25.62 | $4^6 T_{1u}$ | 18.35 | $5^6 T_{2u}$ | 12.65 | $3^6 E_u$    |  |
| 16 $\Gamma_{6u}$                          | 2.466 | 369 | 49946 | 67.52 | $4^6 T_{2u}$ | 14.54 | $3^6 E_u$    |       |              |       |              |  |
| 30 $\Gamma_{8u}$                          | 2.467 | 369 | 50015 | 56.51 | $4^6 T_{2u}$ | 15.05 | $3^6 E_u$    | 13.89 | $3^6 T_{1u}$ |       |              |  |
| 15 $\Gamma_{7u}$                          | 2.466 | 369 | 50064 | 51.40 | $4^6 T_{2u}$ | 20.87 | $3^6 T_{1u}$ |       |              |       |              |  |
| 16 $\Gamma_{7u}$                          | 2.468 | 369 | 50236 | 39.44 | $3^6 E_u$    | 34.75 | $3^6 T_{1u}$ | 11.92 | $4^6 T_{1u}$ |       |              |  |
| 31 $\Gamma_{8u}$                          | 2.468 | 369 | 50270 | 41.76 | $3^6 T_{1u}$ | 21.48 | $3^6 E_u$    | 20.42 | $4^6 T_{1u}$ |       |              |  |
| $4f^7(^6F_{1/2,3/2,5/2,7/2,9/2,11/2})^c$  |       |     |       |       |              |       |              |       |              |       |              |  |
| 17 $\Gamma_{6u}$                          | 2.468 | 369 | 50811 | 44.61 | $5^6 T_{2u}$ | 22.67 | $2^6 A_{2u}$ | 20.41 | $4^6 T_{1u}$ |       |              |  |
| 32 $\Gamma_{8u}$                          | 2.467 | 369 | 51645 | 23.31 | $5^6 T_{2u}$ | 20.69 | $2^6 A_{2u}$ | 15.73 | $3^6 T_{1u}$ | 15.48 | $4^6 T_{2u}$ |  |
| 33 $\Gamma_{8u}$                          | 2.466 | 369 | 52036 | 71.52 | $3^6 T_{1u}$ | 10.67 | $4^6 T_{1u}$ |       |              |       |              |  |
| 17 $\Gamma_{7u}$                          | 2.467 | 369 | 52060 | 42.62 | $5^6 T_{2u}$ | 22.50 | $3^6 T_{1u}$ | 16.16 | $4^6 T_{2u}$ |       |              |  |
| 34 $\Gamma_{8u}$                          | 2.467 | 369 | 52219 | 23.44 | $2^6 A_{2u}$ | 21.23 | $4^6 T_{2u}$ | 21.13 | $5^6 T_{2u}$ | 10.51 | $3^6 E_u$    |  |
| 18 $\Gamma_{6u}$                          | 2.467 | 369 | 52360 | 42.45 | $2^6 A_{2u}$ | 30.03 | $5^6 T_{2u}$ | 15.59 | $4^6 T_{2u}$ |       |              |  |
| 18 $\Gamma_{7u}$                          | 2.469 | 369 | 52547 | 39.91 | $4^6 T_{1u}$ | 25.21 | $2^6 A_{1u}$ | 15.75 | $3^6 T_{1u}$ |       |              |  |
| 35 $\Gamma_{8u}$                          | 2.468 | 369 | 52570 | 56.91 | $5^6 T_{2u}$ | 12.60 | $2^6 A_{2u}$ | 12.35 | $3^6 E_u$    |       |              |  |

|                                              |       |     |       |       |                |       |                |       |                |       |                |
|----------------------------------------------|-------|-----|-------|-------|----------------|-------|----------------|-------|----------------|-------|----------------|
| 36 $\Gamma_{8u}$                             | 2.469 | 369 | 52686 | 34.60 | 5 ${}^6T_{2u}$ | 29.39 | 4 ${}^6T_{1u}$ | 10.54 | 3 ${}^6T_{1u}$ |       |                |
| 19 $\Gamma_{6u}$                             | 2.467 | 369 | 52708 | 51.31 | 5 ${}^6T_{2u}$ | 23.73 | 3 ${}^6E_u$    | 15.59 | 4 ${}^6T_{2u}$ |       |                |
| 37 $\Gamma_{8u}$                             | 2.469 | 371 | 52748 | 43.86 | 4 ${}^6T_{1u}$ | 12.17 | 2 ${}^6A_{1u}$ |       |                |       |                |
| 19 $\Gamma_{7u}$                             | 2.469 | 370 | 52867 | 76.14 | 4 ${}^6T_{1u}$ |       |                |       |                |       |                |
| 20 $\Gamma_{6u}$                             | 2.470 | 369 | 52885 | 66.23 | 4 ${}^6T_{1u}$ | 10.02 | 5 ${}^6T_{2u}$ |       |                |       |                |
| 38 $\Gamma_{8u}$                             | 2.469 | 369 | 53052 | 49.51 | 5 ${}^6T_{2u}$ | 29.97 | 4 ${}^6T_{1u}$ |       |                |       |                |
| $4f^7({}^6H_{5/2,7/2,9/2,11/2,13/2,15/2})^c$ |       |     |       |       |                |       |                |       |                |       |                |
| 20 $\Gamma_{7u}$                             | 2.467 | 370 | 55742 | 56.35 | 5 ${}^6T_{1u}$ | 27.78 | 4 ${}^6E_u$    |       |                |       |                |
| 39 $\Gamma_{8u}$                             | 2.467 | 369 | 55864 | 41.52 | 5 ${}^6T_{1u}$ | 22.97 | 4 ${}^6E_u$    | 16.15 | 6 ${}^6T_{2u}$ | 13.13 | 6 ${}^6T_{1u}$ |
| 40 $\Gamma_{8u}$                             | 2.467 | 369 | 56075 | 80.52 | 5 ${}^6T_{1u}$ | 11.90 | 4 ${}^6E_u$    |       |                |       |                |
| 41 $\Gamma_{8u}$                             | 2.467 | 369 | 56139 | 66.73 | 5 ${}^6T_{1u}$ | 15.24 | 4 ${}^6E_u$    |       |                |       |                |
| 21 $\Gamma_{6u}$                             | 2.467 | 369 | 56146 | 59.31 | 5 ${}^6T_{1u}$ | 14.53 | 4 ${}^6E_u$    | 11.44 | 6 ${}^6T_{2u}$ |       |                |
| 21 $\Gamma_{7u}$                             | 2.467 | 369 | 56154 | 44.16 | 4 ${}^6E_u$    | 39.99 | 5 ${}^6T_{1u}$ | 14.46 | 6 ${}^6T_{1u}$ |       |                |
| 42 $\Gamma_{8u}$                             | 2.467 | 370 | 56161 | 73.73 | 4 ${}^6E_u$    | 13.55 | 6 ${}^6T_{1u}$ |       |                |       |                |
| 22 $\Gamma_{7u}$                             | 2.468 | 367 | 56301 | 36.42 | 6 ${}^6T_{2u}$ | 35.41 | 6 ${}^6T_{1u}$ | 13.29 | 4 ${}^6E_u$    |       |                |
| 43 $\Gamma_{8u}$                             | 2.467 | 369 | 56324 | 70.94 | 5 ${}^6T_{1u}$ | 14.42 | 4 ${}^6E_u$    |       |                |       |                |
| 22 $\Gamma_{6u}$                             | 2.467 | 369 | 56343 | 64.74 | 4 ${}^6E_u$    | 22.88 | 5 ${}^6T_{1u}$ |       |                |       |                |
| 23 $\Gamma_{7u}$                             | 2.466 | 372 | 56356 | 79.51 | 5 ${}^6T_{1u}$ |       |                |       |                |       |                |
| 23 $\Gamma_{6u}$                             | 2.468 | 369 | 56437 | 85.21 | 6 ${}^6T_{1u}$ |       |                |       |                |       |                |
| 44 $\Gamma_{8u}$                             | 2.467 | 369 | 56442 | 42.83 | 6 ${}^6T_{1u}$ | 25.37 | 4 ${}^6E_u$    | 19.12 | 6 ${}^6T_{2u}$ |       |                |
| 45 $\Gamma_{8u}$                             | 2.468 | 370 | 56513 | 67.81 | 6 ${}^6T_{1u}$ | 10.99 | 6 ${}^6T_{2u}$ | 10.09 | 4 ${}^6E_u$    |       |                |
| 24 $\Gamma_{7u}$                             | 2.467 | 370 | 56629 | 80.44 | 6 ${}^6T_{1u}$ |       |                |       |                |       |                |
| 24 $\Gamma_{6u}$                             | 2.469 | 370 | 56636 | 81.71 | 6 ${}^6T_{2u}$ |       |                |       |                |       |                |
| 46 $\Gamma_{8u}$                             | 2.469 | 370 | 56645 | 51.77 | 6 ${}^6T_{1u}$ | 32.07 | 6 ${}^6T_{2u}$ |       |                |       |                |
| 47 $\Gamma_{8u}$                             | 2.469 | 370 | 56837 | 84.24 | 6 ${}^6T_{2u}$ |       |                |       |                |       |                |
| 48 $\Gamma_{8u}$                             | 2.469 | 370 | 56896 | 52.48 | 6 ${}^6T_{2u}$ | 33.88 | 6 ${}^6T_{1u}$ |       |                |       |                |
| 25 $\Gamma_{6u}$                             | 2.469 | 370 | 56902 | 84.22 | 6 ${}^6T_{2u}$ |       |                |       |                |       |                |
| 49 $\Gamma_{8u}$                             | 2.470 | 370 | 56940 | 52.35 | 6 ${}^6T_{2u}$ | 35.45 | 6 ${}^6T_{1u}$ |       |                |       |                |
| 25 $\Gamma_{7u}$                             | 2.470 | 370 | 56972 | 47.80 | 6 ${}^6T_{1u}$ | 41.88 | 6 ${}^6T_{2u}$ |       |                |       |                |

Eu<sup>3+</sup>-doped SrF<sub>2</sub>

|                     |       |     |       |       |                |       |                |       |                |  |  |
|---------------------|-------|-----|-------|-------|----------------|-------|----------------|-------|----------------|--|--|
| $4f^6({}^7F_{0-6})$ |       |     |       |       |                |       |                |       |                |  |  |
| 1 $A_{1g}$          | 2.313 | 445 | 0     | 36.42 | 1 ${}^7T_{2g}$ | 31.64 | 1 ${}^7T_{1g}$ | 26.18 | 1 ${}^7A_{2g}$ |  |  |
| 1 $T_{1g}$          | 2.313 | 445 | 359   | 36.24 | 1 ${}^7T_{2g}$ | 30.33 | 1 ${}^7A_{2g}$ | 28.55 | 1 ${}^7T_{1g}$ |  |  |
| 1 $T_{2g}$          | 2.313 | 443 | 873   | 49.66 | 1 ${}^7A_{2g}$ | 35.60 | 1 ${}^7T_{2g}$ | 11.22 | 1 ${}^7T_{1g}$ |  |  |
| 1 $E_g$             | 2.314 | 447 | 1327  | 63.49 | 1 ${}^7T_{1g}$ | 32.80 | 1 ${}^7T_{2g}$ |       |                |  |  |
| 2 $T_{1g}$          | 2.313 | 445 | 1974  | 41.13 | 1 ${}^7T_{1g}$ | 28.23 | 1 ${}^7A_{2g}$ | 28.07 | 1 ${}^7T_{2g}$ |  |  |
| 2 $T_{2g}$          | 2.313 | 447 | 2065  | 61.66 | 1 ${}^7T_{1g}$ | 24.20 | 1 ${}^7T_{2g}$ | 11.50 | 1 ${}^7A_{2g}$ |  |  |
| 1 $A_{2g}$          | 2.314 | 447 | 2274  | 50.36 | 1 ${}^7T_{1g}$ | 47.09 | 1 ${}^7T_{2g}$ |       |                |  |  |
| 2 $A_{1g}$          | 2.312 | 443 | 2581  | 55.76 | 1 ${}^7A_{2g}$ | 42.06 | 1 ${}^7T_{1g}$ |       |                |  |  |
| 3 $T_{1g}$          | 2.313 | 446 | 3082  | 45.64 | 1 ${}^7T_{2g}$ | 35.23 | 1 ${}^7T_{1g}$ | 17.03 | 1 ${}^7A_{2g}$ |  |  |
| 3 $T_{2g}$          | 2.313 | 447 | 3293  | 78.32 | 1 ${}^7T_{1g}$ | 16.92 | 1 ${}^7T_{2g}$ |       |                |  |  |
| 2 $E_g$             | 2.314 | 447 | 3393  | 79.35 | 1 ${}^7T_{2g}$ | 18.61 | 1 ${}^7T_{1g}$ |       |                |  |  |
| 4 $T_{2g}$          | 2.313 | 446 | 4121  | 37.15 | 1 ${}^7T_{2g}$ | 36.62 | 1 ${}^7T_{1g}$ | 23.87 | 1 ${}^7A_{2g}$ |  |  |
| 4 $T_{1g}$          | 2.313 | 447 | 4353  | 72.25 | 1 ${}^7T_{2g}$ | 15.33 | 1 ${}^7T_{1g}$ | 10.04 | 1 ${}^7A_{2g}$ |  |  |
| 3 $E_g$             | 2.314 | 447 | 4525  | 49.42 | 1 ${}^7T_{2g}$ | 48.23 | 1 ${}^7T_{1g}$ |       |                |  |  |
| 5 $T_{1g}$          | 2.314 | 447 | 4527  | 55.24 | 1 ${}^7T_{2g}$ | 42.20 | 1 ${}^7T_{1g}$ |       |                |  |  |
| 3 $A_{1g}$          | 2.313 | 446 | 5490  | 59.20 | 1 ${}^7T_{2g}$ | 22.37 | 1 ${}^7T_{1g}$ | 15.17 | 1 ${}^7A_{2g}$ |  |  |
| 6 $T_{1g}$          | 2.313 | 447 | 5536  | 53.90 | 1 ${}^7T_{2g}$ | 31.51 | 1 ${}^7T_{1g}$ | 11.32 | 1 ${}^7A_{2g}$ |  |  |
| 5 $T_{2g}$          | 2.313 | 447 | 5555  | 47.01 | 1 ${}^7T_{1g}$ | 40.35 | 1 ${}^7T_{2g}$ |       |                |  |  |
| 4 $E_g$             | 2.314 | 447 | 5734  | 63.51 | 1 ${}^7T_{1g}$ | 33.15 | 1 ${}^7T_{2g}$ |       |                |  |  |
| 6 $T_{2g}$          | 2.314 | 447 | 5741  | 56.99 | 1 ${}^7T_{1g}$ | 39.63 | 1 ${}^7T_{2g}$ |       |                |  |  |
| 2 $A_{2g}$          | 2.314 | 447 | 5753  | 49.93 | 1 ${}^7T_{2g}$ | 46.69 | 1 ${}^7T_{1g}$ |       |                |  |  |
| $4f^6({}^5D_{0-3})$ |       |     |       |       |                |       |                |       |                |  |  |
| 4 $A_{1g}$          | 2.313 | 448 | 20028 | 55.32 | 1 ${}^5T_{2g}$ | 38.81 | 1 ${}^5E_g$    |       |                |  |  |
| 7 $T_{1g}$          | 2.313 | 448 | 20835 | 55.33 | 1 ${}^5T_{2g}$ | 39.38 | 1 ${}^5E_g$    |       |                |  |  |
| 5 $E_g$             | 2.312 | 448 | 22439 | 54.68 | 1 ${}^5E_g$    | 40.89 | 1 ${}^5T_{2g}$ |       |                |  |  |
| 7 $T_{2g}$          | 2.313 | 448 | 22570 | 64.91 | 1 ${}^5T_{2g}$ | 30.53 | 1 ${}^5E_g$    |       |                |  |  |
| 3 $A_{2g}$          | 2.311 | 449 | 25110 | 95.59 | 1 ${}^5E_g$    |       |                |       |                |  |  |



|                                            |       |     |       |       |                |       |                |       |                |       |                |  |  |
|--------------------------------------------|-------|-----|-------|-------|----------------|-------|----------------|-------|----------------|-------|----------------|--|--|
| 8 $T_{2g}$                                 | 2.312 | 448 | 25195 | 51.40 | 1 ${}^5T_{2g}$ | 44.32 | 1 ${}^5E_g$    |       |                |       |                |  |  |
| 8 $T_{1g}$                                 | 2.312 | 447 | 25204 | 87.26 | 1 ${}^5T_{2g}$ |       |                |       |                |       |                |  |  |
| $4f^6({}^5D_4, {}^5L_{6-10}, {}^5G_{2-6})$ |       |     |       |       |                |       |                |       |                |       |                |  |  |
| 9 $T_{2g}$                                 | 2.310 | 448 | 28095 | 38.32 | 1 ${}^5T_{1g}$ | 28.24 | 2 ${}^5E_g$    |       |                |       |                |  |  |
| 6 $E_g$                                    | 2.310 | 448 | 28096 | 38.42 | 1 ${}^5T_{1g}$ | 23.43 | 2 ${}^5E_g$    | 14.46 | 1 ${}^5A_{1g}$ |       |                |  |  |
| 4 $A_{2g}$                                 | 2.310 | 448 | 28121 | 42.36 | 1 ${}^5T_{1g}$ | 36.21 | 2 ${}^5E_g$    |       |                |       |                |  |  |
| 10 $T_{2g}$                                | 2.310 | 448 | 28311 | 52.37 | 2 ${}^5T_{2g}$ | 12.59 | 1 ${}^5T_{2g}$ |       |                |       |                |  |  |
| 9 $T_{1g}$                                 | 2.310 | 447 | 28323 | 34.05 | 2 ${}^5E_g$    | 25.08 | 1 ${}^5T_{1g}$ | 22.24 | 2 ${}^5T_{2g}$ |       |                |  |  |
| 7 $E_g$                                    | 2.310 | 448 | 28439 | 39.85 | 2 ${}^5T_{2g}$ | 13.57 | 1 ${}^5T_{2g}$ | 11.00 | 1 ${}^5E_g$    |       |                |  |  |
| 5 $A_{1g}$                                 | 2.310 | 447 | 28480 | 59.05 | 2 ${}^5E_g$    | 16.65 | 2 ${}^5T_{2g}$ |       |                |       |                |  |  |
| 10 $T_{1g}$                                | 2.311 | 447 | 28490 | 37.29 | 1 ${}^5T_{1g}$ | 24.15 | 2 ${}^5T_{2g}$ |       |                |       |                |  |  |
| 11 $T_{2g}$                                | 2.311 | 447 | 28633 | 31.89 | 1 ${}^5T_{1g}$ | 16.68 | 2 ${}^5T_{2g}$ | 16.39 | 1 ${}^5A_{1g}$ | 15.95 | 2 ${}^5E_g$    |  |  |
| 5 $A_{2g}$                                 | 2.312 | 448 | 28670 | 36.27 | 3 ${}^5E_g$    | 32.56 | 2 ${}^5T_{1g}$ | 12.52 | 2 ${}^5E_g$    |       |                |  |  |
| 12 $T_{2g}$                                | 2.311 | 449 | 28692 | 27.18 | 3 ${}^5E_g$    | 24.33 | 2 ${}^5T_{1g}$ | 15.58 | 1 ${}^5T_{1g}$ |       |                |  |  |
| 8 $E_g$                                    | 2.312 | 447 | 28875 | 35.89 | 2 ${}^5T_{1g}$ | 20.48 | 3 ${}^5E_g$    |       |                |       |                |  |  |
| 11 $T_{1g}$                                | 2.311 | 445 | 28925 | 22.30 | 3 ${}^5E_g$    | 21.76 | 1 ${}^5T_{1g}$ | 18.10 | 2 ${}^5T_{1g}$ |       |                |  |  |
| 13 $T_{2g}$                                | 2.313 | 445 | 28960 | 20.22 | 3 ${}^5T_{2g}$ | 12.90 | 3 ${}^5T_{1g}$ | 11.66 | 4 ${}^5T_{2g}$ | 11.43 | 1 ${}^5T_{2g}$ |  |  |
|                                            |       |     |       | 10.99 | 2 ${}^5T_{1g}$ |       |                |       |                |       |                |  |  |
| 12 $T_{1g}$                                | 2.311 | 446 | 28988 | 25.60 | 1 ${}^5T_{1g}$ | 20.87 | 2 ${}^5E_g$    | 13.28 | 2 ${}^5T_{2g}$ | 12.19 | 2 ${}^5T_{1g}$ |  |  |
| 14 $T_{2g}$                                | 2.313 | 449 | 29027 | 23.69 | 1 ${}^5T_{2g}$ | 20.77 | 2 ${}^5T_{1g}$ | 15.83 | 2 ${}^5T_{2g}$ |       |                |  |  |
| 13 $T_{1g}$                                | 2.313 | 449 | 29061 | 18.81 | 3 ${}^5T_{2g}$ | 18.04 | 1 ${}^5T_{2g}$ | 16.97 | 1 ${}^5E_g$    | 16.94 | 3 ${}^5T_{1g}$ |  |  |
|                                            |       |     |       | 13.15 | 4 ${}^5T_{2g}$ |       |                |       |                |       |                |  |  |
| 6 $A_{1g}$                                 | 2.312 | 446 | 29071 | 55.04 | 1 ${}^5E_g$    | 37.70 | 1 ${}^5T_{2g}$ |       |                |       |                |  |  |
| 9 $E_g$                                    | 2.311 | 447 | 29156 | 32.88 | 2 ${}^5E_g$    | 29.06 | 1 ${}^5A_{1g}$ |       |                |       |                |  |  |
| 10 $E_g$                                   | 2.313 | 450 | 29194 | 32.07 | 1 ${}^5T_{2g}$ | 28.04 | 2 ${}^5T_{2g}$ | 23.33 | 1 ${}^5E_g$    |       |                |  |  |
| 14 $T_{1g}$                                | 2.312 | 446 | 29202 | 35.24 | 2 ${}^5T_{2g}$ | 15.96 | 1 ${}^5T_{1g}$ |       |                |       |                |  |  |
| 7 $A_{1g}$                                 | 2.314 | 449 | 29208 | 44.64 | 4 ${}^5T_{2g}$ | 34.23 | 4 ${}^5E_g$    |       |                |       |                |  |  |
| 15 $T_{1g}$                                | 2.313 | 451 | 29244 | 15.43 | 1 ${}^5T_{1g}$ | 12.52 | 3 ${}^5E_g$    | 11.80 | 1 ${}^5T_{2g}$ | 10.90 | 1 ${}^5E_g$    |  |  |
|                                            |       |     |       | 10.68 | 2 ${}^5T_{1g}$ | 10.55 | 3 ${}^5T_{1g}$ |       |                |       |                |  |  |
| 15 $T_{2g}$                                | 2.313 | 446 | 29265 | 23.37 | 2 ${}^5A_{1g}$ | 22.73 | 2 ${}^5T_{1g}$ |       |                |       |                |  |  |
| 16 $T_{2g}$                                | 2.313 | 450 | 29292 | 21.89 | 3 ${}^5T_{1g}$ | 21.14 | 2 ${}^5T_{2g}$ | 11.37 | 1 ${}^5T_{2g}$ | 10.01 | 3 ${}^5T_{2g}$ |  |  |
| 6 $A_{2g}$                                 | 2.313 | 447 | 29385 | 55.50 | 3 ${}^5T_{1g}$ | 25.95 | 4 ${}^5E_g$    | 11.67 | 2 ${}^5T_{1g}$ |       |                |  |  |
| 17 $T_{2g}$                                | 2.315 | 448 | 29518 | 46.14 | 3 ${}^5T_{2g}$ | 26.40 | 4 ${}^5T_{2g}$ |       |                |       |                |  |  |
| 16 $T_{1g}$                                | 2.313 | 447 | 29610 | 50.71 | 2 ${}^5T_{1g}$ | 11.03 | 4 ${}^5E_g$    | 10.09 | 4 ${}^5T_{2g}$ |       |                |  |  |
| 11 $E_g$                                   | 2.314 | 447 | 29669 | 34.27 | 4 ${}^5E_g$    | 25.18 | 4 ${}^5T_{2g}$ | 15.06 | 3 ${}^5T_{1g}$ |       |                |  |  |
| 17 $T_{1g}$                                | 2.313 | 450 | 29719 | 29.04 | 3 ${}^5T_{1g}$ | 17.16 | 4 ${}^5T_{2g}$ | 14.72 | 3 ${}^5T_{2g}$ | 13.30 | 2 ${}^5T_{1g}$ |  |  |
| 8 $A_{1g}$                                 | 2.312 | 449 | 29745 | 64.34 | 3 ${}^5E_g$    | 12.27 | 2 ${}^5T_{2g}$ |       |                |       |                |  |  |
| 12 $E_g$                                   | 2.313 | 448 | 29843 | 30.47 | 3 ${}^5E_g$    | 21.02 | 2 ${}^5A_{1g}$ | 12.98 | 1 ${}^5A_{1g}$ |       |                |  |  |
| 18 $T_{2g}$                                | 2.312 | 445 | 30018 | 21.96 | 1 ${}^5T_{1g}$ | 14.66 | 2 ${}^5E_g$    | 11.61 | 2 ${}^5T_{1g}$ |       |                |  |  |
| 13 $E_g$                                   | 2.312 | 449 | 30024 | 27.38 | 3 ${}^5T_{2g}$ | 20.58 | 2 ${}^5A_{1g}$ | 18.85 | 1 ${}^5T_{1g}$ |       |                |  |  |
| 7 $A_{2g}$                                 | 2.311 | 447 | 30097 | 35.84 | 1 ${}^5T_{1g}$ | 34.41 | 2 ${}^5E_g$    |       |                |       |                |  |  |
| 19 $T_{2g}$                                | 2.312 | 447 | 30116 | 16.97 | 3 ${}^5T_{1g}$ | 16.06 | 4 ${}^5E_g$    | 16.04 | 2 ${}^5T_{2g}$ | 15.65 | 1 ${}^5A_{1g}$ |  |  |
| 18 $T_{1g}$                                | 2.313 | 444 | 30137 | 31.98 | 2 ${}^5T_{2g}$ | 12.80 | 1 ${}^5T_{1g}$ |       |                |       |                |  |  |
| 9 $A_{1g}$                                 | 2.311 | 448 | 30167 | 46.34 | 2 ${}^5T_{2g}$ | 18.70 | 3 ${}^5E_g$    | 13.50 | 5 ${}^5E_g$    |       |                |  |  |
| 20 $T_{2g}$                                | 2.311 | 451 | 30207 | 19.95 | 2 ${}^5T_{2g}$ | 19.15 | 1 ${}^5T_{1g}$ | 15.34 | 3 ${}^5T_{1g}$ | 10.85 | 2 ${}^5E_g$    |  |  |
| 19 $T_{1g}$                                | 2.313 | 452 | 30279 | 33.24 | 4 ${}^5T_{2g}$ | 22.11 | 3 ${}^5T_{2g}$ |       |                |       |                |  |  |
| 14 $E_g$                                   | 2.313 | 448 | 30355 | 36.18 | 3 ${}^5T_{2g}$ | 16.62 | 4 ${}^5E_g$    |       |                |       |                |  |  |
| 21 $T_{2g}$                                | 2.313 | 448 | 30440 | 30.44 | 4 ${}^5T_{2g}$ | 27.41 | 3 ${}^5T_{1g}$ | 18.02 | 4 ${}^5E_g$    |       |                |  |  |
| 20 $T_{1g}$                                | 2.312 | 449 | 30569 | 42.10 | 3 ${}^5E_g$    | 37.01 | 2 ${}^5T_{1g}$ |       |                |       |                |  |  |
| 22 $T_{2g}$                                | 2.313 | 450 | 30642 | 28.37 | 2 ${}^5A_{1g}$ | 25.82 | 2 ${}^5T_{1g}$ | 15.92 | 3 ${}^5E_g$    |       |                |  |  |
| 21 $T_{1g}$                                | 2.313 | 448 | 30989 | 36.92 | 3 ${}^5T_{2g}$ | 26.25 | 3 ${}^5T_{1g}$ | 14.03 | 4 ${}^5E_g$    |       |                |  |  |
| 15 $E_g$                                   | 2.313 | 449 | 31036 | 39.86 | 3 ${}^5T_{1g}$ | 27.01 | 4 ${}^5T_{2g}$ |       |                |       |                |  |  |
| 10 $A_{1g}$                                | 2.313 | 448 | 31088 | 60.70 | 3 ${}^5T_{2g}$ | 23.96 | 4 ${}^5E_g$    |       |                |       |                |  |  |
| 22 $T_{1g}$                                | 2.314 | 448 | 31209 | 49.22 | 4 ${}^5T_{2g}$ | 25.49 | 3 ${}^5T_{2g}$ | 18.74 | 3 ${}^5T_{1g}$ |       |                |  |  |
| 23 $T_{2g}$                                | 2.313 | 448 | 31256 | 38.66 | 4 ${}^5T_{2g}$ | 28.19 | 3 ${}^5T_{1g}$ | 19.58 | 4 ${}^5E_g$    |       |                |  |  |
| 8 $A_{2g}$                                 | 2.313 | 448 | 31263 | 66.19 | 4 ${}^5E_g$    | 28.38 | 3 ${}^5T_{1g}$ |       |                |       |                |  |  |
| 9 $A_{2g}$                                 | 2.312 | 449 | 31614 | 44.09 | 3 ${}^5E_g$    | 37.11 | 2 ${}^5T_{1g}$ |       |                |       |                |  |  |
| 24 $T_{2g}$                                | 2.312 | 450 | 31643 | 34.28 | 2 ${}^5T_{1g}$ | 28.30 | 3 ${}^5E_g$    | 14.47 | 2 ${}^5A_{1g}$ |       |                |  |  |
| 16 $E_g$                                   | 2.312 | 450 | 31659 | 34.10 | 2 ${}^5T_{1g}$ | 21.10 | 2 ${}^5A_{1g}$ | 20.49 | 3 ${}^5E_g$    |       |                |  |  |
| 23 $T_{1g}$                                | 2.313 | 448 | 32085 | 51.94 | 3 ${}^5T_{1g}$ | 27.78 | 3 ${}^5T_{2g}$ |       |                |       |                |  |  |
| 25 $T_{2g}$                                | 2.313 | 449 | 32093 | 44.82 | 3 ${}^5T_{2g}$ | 23.52 | 3 ${}^5T_{1g}$ | 12.71 | 4 ${}^5T_{2g}$ |       |                |  |  |

|    |          |       |     |       |       |             |       |             |       |             |       |             |
|----|----------|-------|-----|-------|-------|-------------|-------|-------------|-------|-------------|-------|-------------|
| 11 | $A_{1g}$ | 2.315 | 449 | 32335 | 46.68 | $4^5T_{2g}$ | 35.65 | $4^5E_g$    | 10.72 | $3^5T_{2g}$ |       |             |
| 24 | $T_{1g}$ | 2.313 | 449 | 32341 | 36.97 | $4^5T_{2g}$ | 34.92 | $4^5E_g$    | 13.59 | $3^5T_{1g}$ | 10.21 | $3^5T_{2g}$ |
| 17 | $E_g$    | 2.313 | 448 | 32345 | 33.19 | $4^5E_g$    | 29.05 | $4^5T_{2g}$ | 23.01 | $3^5T_{1g}$ | 12.12 | $3^5T_{2g}$ |
| 26 | $T_{2g}$ | 2.313 | 448 | 32380 | 47.08 | $4^5T_{2g}$ | 22.77 | $3^5T_{2g}$ | 19.43 | $4^5E_g$    |       |             |

<sup>a</sup> Absorption oscillator strengths for  $1\Gamma_{6u,8u,7u} \rightarrow i$  transitions are calculated at  $d_{E_u-F} = 2.450 \text{ \AA}$ ; the reference value is  $f_{ref} = 1.690 \times 10^{-2}$ . Emission oscillator strengths for  $1\Gamma_{8g} \rightarrow 1\Gamma_{6u,1}\Gamma_{8u,1}\Gamma_{7u}$  and radiative emission lifetime are calculated at  $d_{E_u-F} = 2.450 \text{ \AA}$ ; the reference value is  $f_{ref} = 2.231 \times 10^{-3}$ .

<sup>b</sup> The analysis of the wave function has been done at  $d_{E_u-F} = 2.450 \text{ \AA}$  ( $4f^7$ ),  $2.450 \text{ \AA}$  ( $4f^6(5d^1 + ITE_{a_{1g}}^1)$ ),  $2.300 \text{ \AA}$  ( $4f^6$ ).

<sup>c</sup> C.f. Table S8

TABLE S11: Spectroscopic constants and analyses of the spin-orbit wave functions of the ground and lowest lying excited states of  $\text{Eu}^{2+}$  and  $\text{Eu}^{3+}$ -doped  $\text{BaF}_2$  cubic defects.  $\text{Eu-F}$  bond distances ( $d_{\text{Eu-F},e}$  in Å),  $\text{EuF}_8$  breathing mode harmonic vibrational frequencies ( $\omega_{a_{1g}}$  in  $\text{cm}^{-1}$ ), minimum-to-minimum energy differences ( $T_e$  in  $\text{cm}^{-1}$ ), and relative absorption and emission oscillator strengths ( $f_i^{abs}/f_{ref}$  and  $f_i^{emi}/f_{ref}$ ) are given. Calculated radiative emission lifetime for the  $4f^6(^7F_J)5de_g^1 - 1\Gamma_{8g}$  excited state is  $0.451 \mu\text{s}$ . Local distortion around the  $\text{Eu}^{2+}$  impurity, relative to experimental crystal structure  $d_{\text{Ba-F}} = 2.685$  Å, is  $d_{\text{Eu-F},e}(1\Gamma_{6u}) - d_{\text{Ba-F}} = -0.127$ ; ionic radii mismatch is  $+0.17 \text{Å}^{31}$ . See Fig. 3, S3 and text for details.

| State                                                | $d_{\text{Eu-F},e}$ | $\omega_{a_{1g}}$ | $T_e$ | $f_i^{abs}/f_{ref}$ <sup>a</sup> | $f_i^{emi}/f_{ref}$ <sup>a</sup> | weights of terms larger than 10% <sup>b</sup> |             |             |       |             |       |
|------------------------------------------------------|---------------------|-------------------|-------|----------------------------------|----------------------------------|-----------------------------------------------|-------------|-------------|-------|-------------|-------|
| $4f^7(^8S_{7/2})$ <sup>c</sup>                       |                     |                   |       |                                  |                                  |                                               |             |             |       |             |       |
| $1\Gamma_{6u}$                                       | 2.558               | 321               | 0.000 |                                  | 1.00                             | 97.79                                         | $1^8A_{1u}$ |             |       |             |       |
| $1\Gamma_{8u}$                                       | 2.558               | 321               | 0.026 |                                  | 0.86                             | 97.79                                         | $1^8A_{1u}$ |             |       |             |       |
| $1\Gamma_{7u}$                                       | 2.558               | 321               | 0.069 |                                  | 0.03                             | 97.79                                         | $1^8A_{1u}$ |             |       |             |       |
| $4f^6(5d + IT E_{a_{1g}})^1$ excited states          |                     |                   |       |                                  |                                  |                                               |             |             |       |             |       |
| $4f^6(^7F_J)5de_g^1$ High-Spin coupling <sup>d</sup> |                     |                   |       |                                  |                                  |                                               |             |             |       |             |       |
| $1\Gamma_{8g}$                                       | 2.535               | 328               | 28044 | 1.00                             | 49.84                            | $1^8T_{2g}$                                   | 35.40       | $1^8T_{1g}$ |       |             |       |
| $1\Gamma_{7g}$                                       | 2.535               | 328               | 28216 | 0.52                             | 54.74                            | $1^8T_{2g}$                                   | 37.06       | $1^8T_{1g}$ |       |             |       |
| $2\Gamma_{8g}$                                       | 2.535               | 328               | 28369 | 0.10                             | 70.12                            | $1^8T_{2g}$                                   | 16.91       | $1^8E_g$    |       |             |       |
| $2\Gamma_{7g}$                                       | 2.535               | 328               | 28747 | 0.77                             | 48.37                            | $1^8T_{1g}$                                   | 37.99       | $1^8T_{2g}$ |       |             |       |
| $3\Gamma_{8g}$                                       | 2.535               | 328               | 29066 | 1.06                             | 35.81                            | $1^8T_{2g}$                                   | 32.01       | $1^8T_{1g}$ | 22.86 | $1^8E_g$    |       |
| $1\Gamma_{6g}$                                       | 2.535               | 328               | 29198 | 0.37                             | 32.70                            | $1^8T_{2g}$                                   | 24.78       | $1^8T_{1g}$ | 22.58 | $1^8E_g$    | 16.02 |
| $4\Gamma_{8g}$                                       | 2.535               | 328               | 29660 | 1.80                             | 50.95                            | $1^8T_{1g}$                                   | 23.20       | $1^8T_{2g}$ | 13.59 | $2^8T_{1g}$ |       |
| $2\Gamma_{6g}$                                       | 2.535               | 328               | 29776 | 0.31                             | 30.74                            | $1^8T_{2g}$                                   | 21.95       | $1^8E_g$    | 21.40 | $1^8T_{1g}$ | 20.03 |
| $5\Gamma_{8g}$                                       | 2.535               | 328               | 29952 | 0.22                             | 45.02                            | $1^8E_g$                                      | 34.65       | $2^8T_{1g}$ | 14.65 | $1^8T_{2g}$ |       |
| $3\Gamma_{7g}$                                       | 2.535               | 329               | 30009 | 0.74                             | 39.16                            | $1^8T_{1g}$                                   | 27.82       | $1^8E_g$    | 27.80 | $1^8T_{2g}$ |       |
| $6\Gamma_{8g}$                                       | 2.534               | 329               | 30238 | 0.48                             | 34.40                            | $1^8E_g$                                      | 31.67       | $1^8T_{2g}$ | 13.89 | $1^8T_{1g}$ | 11.28 |
| $7\Gamma_{8g}$                                       | 2.534               | 327               | 30561 | 0.71                             | 41.88                            | $2^8T_{1g}$                                   | 23.03       | $1^8T_{1g}$ | 18.01 | $1^8T_{2g}$ | 15.44 |
| $3\Gamma_{6g}$                                       | 2.534               | 328               | 30578 | 0.63                             | 44.79                            | $1^8T_{1g}$                                   | 21.53       | $2^8T_{1g}$ | 18.33 | $2^8T_{2g}$ |       |
| $8\Gamma_{8g}$                                       | 2.535               | 328               | 31093 | 1.60                             | 45.56                            | $1^8T_{1g}$                                   | 25.02       | $2^8T_{1g}$ | 17.26 | $1^8T_{2g}$ |       |
| $9\Gamma_{8g}$                                       | 2.534               | 328               | 31249 | 0.52                             | 23.12                            | $1^8E_g$                                      | 21.58       | $1^8T_{2g}$ | 19.73 | $1^8T_{1g}$ | 19.35 |
|                                                      |                     |                   |       |                                  | 15.43                            | $2^8T_{2g}$                                   |             |             |       |             |       |
| $4\Gamma_{7g}$                                       | 2.535               | 328               | 31272 | 1.16                             | 55.17                            | $1^8T_{1g}$                                   | 18.42       | $1^8T_{2g}$ | 13.31 | $1^8E_g$    |       |
| $4\Gamma_{6g}$                                       | 2.534               | 328               | 31286 | 0.30                             | 33.65                            | $2^8T_{1g}$                                   | 25.63       | $1^8T_{2g}$ | 21.00 | $2^8T_{2g}$ | 14.78 |
| $5\Gamma_{7g}$                                       | 2.534               | 328               | 31375 | 0.34                             | 37.92                            | $1^8T_{2g}$                                   | 30.02       | $2^8T_{1g}$ | 12.74 | $1^8E_g$    | 10.38 |
| $5\Gamma_{6g}$                                       | 2.534               | 328               | 31655 | 0.10                             | 42.63                            | $2^8T_{2g}$                                   | 32.24       | $1^8T_{2g}$ | 14.54 | $2^8T_{1g}$ |       |
| $10\Gamma_{8g}$                                      | 2.534               | 328               | 31702 | 0.05                             | 56.90                            | $2^8T_{2g}$                                   | 21.90       | $1^8E_g$    | 12.69 | $1^8T_{2g}$ |       |
| $11\Gamma_{8g}$                                      | 2.535               | 328               | 31940 | 0.74                             | 28.36                            | $1^8T_{2g}$                                   | 21.18       | $1^8T_{1g}$ | 20.05 | $1^6T_{1g}$ | 15.74 |
|                                                      |                     |                   |       |                                  | 10.29                            | $2^8T_{1g}$                                   |             |             |       |             |       |
| $6\Gamma_{6g}$                                       | 2.534               | 328               | 31947 | 0.51                             | 31.78                            | $1^8T_{2g}$                                   | 30.23       | $2^8T_{2g}$ | 16.86 | $1^8T_{1g}$ | 11.37 |
| $13\Gamma_{8g}$                                      | 2.534               | 327               | 32366 | 0.45                             | 26.80                            | $1^8E_g$                                      | 21.65       | $1^8T_{2g}$ | 20.22 | $2^8T_{1g}$ | 18.55 |
| $6\Gamma_{7g}$                                       | 2.534               | 328               | 32392 | 0.01                             | 57.19                            | $2^8T_{1g}$                                   | 15.61       | $2^8T_{2g}$ | 13.51 | $1^8T_{2g}$ |       |
| $14\Gamma_{8g}$                                      | 2.534               | 328               | 32631 | 1.40                             | 42.23                            | $2^8T_{1g}$                                   | 27.52       | $1^8T_{1g}$ | 14.10 | $2^8T_{2g}$ |       |
| $15\Gamma_{8g}$                                      | 2.534               | 328               | 33097 | 3.20                             | 67.64                            | $1^8T_{1g}$                                   | 24.19       | $1^8T_{2g}$ |       |             |       |
| $7\Gamma_{6g}$                                       | 2.534               | 329               | 33109 | 1.72                             | 71.72                            | $1^8T_{1g}$                                   | 22.29       | $1^8T_{2g}$ |       |             |       |
| $7\Gamma_{7g}$                                       | 2.533               | 328               | 33119 |                                  | 72.99                            | $2^8T_{2g}$                                   | 15.57       | $1^8E_g$    |       |             |       |
| $16\Gamma_{8g}$                                      | 2.533               | 328               | 33267 | 0.59                             | 61.65                            | $2^8T_{2g}$                                   | 17.12       | $2^8T_{1g}$ | 10.31 | $1^8E_g$    |       |
| $8\Gamma_{6g}$                                       | 2.534               | 328               | 33394 | 0.07                             | 59.12                            | $2^8T_{2g}$                                   | 25.14       | $2^8T_{1g}$ |       |             |       |
| $18\Gamma_{8g}$                                      | 2.535               | 328               | 33632 | 1.32                             | 42.78                            | $2^8T_{1g}$                                   | 21.24       | $1^8E_g$    | 20.69 | $1^8T_{1g}$ |       |
| $9\Gamma_{6g}$                                       | 2.534               | 328               | 33691 | 0.06                             | 52.37                            | $2^8T_{1g}$                                   | 16.25       | $1^8E_g$    | 16.24 | $2^8T_{2g}$ | 11.58 |
| $19\Gamma_{8g}$                                      | 2.534               | 326               | 33978 | 0.16                             | 66.84                            | $2^8T_{1g}$                                   | 13.49       | $1^8E_g$    |       |             |       |
| $9\Gamma_{7g}$                                       | 2.534               | 326               | 34118 |                                  | 74.63                            | $2^8T_{1g}$                                   |             |             |       |             |       |
| $20\Gamma_{8g}$                                      | 2.533               | 327               | 34955 | 0.02                             | 87.51                            | $2^8T_{2g}$                                   |             |             |       |             |       |
| $21\Gamma_{8g}$                                      | 2.533               | 327               | 35114 | 0.01                             | 78.75                            | $2^8T_{2g}$                                   | 16.41       | $2^8T_{1g}$ |       |             |       |
| $10\Gamma_{7g}$                                      | 2.533               | 327               | 35149 |                                  | 81.71                            | $2^8T_{2g}$                                   | 16.44       | $2^8T_{1g}$ |       |             |       |
| $4f^6(^7F_J)5de_g^1$ Low-Spin coupling <sup>d</sup>  |                     |                   |       |                                  |                                  |                                               |             |             |       |             |       |
| $12\Gamma_{8g}$                                      | 2.534               | 323               | 32066 | 0.36                             | 67.94                            | $1^6T_{1g}$                                   |             |             |       |             |       |
| $8\Gamma_{7g}$                                       | 2.533               | 323               | 33327 | 0.02                             | 85.17                            | $1^6T_{1g}$                                   | 10.69       | $1^6T_{2g}$ |       |             |       |

|                                                                            |               |       |      |       |      |       |             |       |             |       |             |       |             |  |  |  |  |  |  |
|----------------------------------------------------------------------------|---------------|-------|------|-------|------|-------|-------------|-------|-------------|-------|-------------|-------|-------------|--|--|--|--|--|--|
| 17                                                                         | $\Gamma_{8g}$ | 2.534 | 323  | 33416 | 0.07 | 87.95 | $1^6T_{1g}$ |       |             |       |             |       |             |  |  |  |  |  |  |
| 10                                                                         | $\Gamma_{6g}$ | 2.531 | 323  | 35050 | 0.04 | 56.42 | $1^6T_{1g}$ | 30.15 | $1^6T_{2g}$ | 11.28 | $2^6T_{1g}$ |       |             |  |  |  |  |  |  |
| 22                                                                         | $\Gamma_{8g}$ | 2.531 | 323  | 35174 | 0.07 | 58.76 | $1^6T_{1g}$ | 27.41 | $1^6T_{2g}$ |       |             |       |             |  |  |  |  |  |  |
| 11                                                                         | $\Gamma_{7g}$ | 2.533 | 322  | 35457 | 0.04 | 78.77 | $1^6T_{1g}$ | 10.79 | $1^6T_{2g}$ |       |             |       |             |  |  |  |  |  |  |
| 11                                                                         | $\Gamma_{6g}$ | 2.530 | 304  | 35760 | 0.01 | 58.53 | $1^6T_{2g}$ | 23.21 | $1^6E_g$    | 13.04 | $1^6T_{1g}$ |       |             |  |  |  |  |  |  |
| 23                                                                         | $\Gamma_{8g}$ | 2.531 | 324  | 35994 | 0.02 | 24.75 | $1^6T_{2g}$ | 23.41 | $1^6T_{1g}$ | 22.47 | $1^6E_g$    | 21.55 | $2^6T_{1g}$ |  |  |  |  |  |  |
| 12                                                                         | $\Gamma_{7g}$ | 2.531 | 324  | 36127 | 0.01 | 45.45 | $2^6T_{1g}$ | 24.51 | $1^6T_{2g}$ | 19.20 | $1^6E_g$    |       |             |  |  |  |  |  |  |
| 24                                                                         | $\Gamma_{8g}$ | 2.530 | 323  | 36652 | 0.02 | 32.75 | $2^6T_{1g}$ | 28.62 | $1^6T_{2g}$ | 23.45 | $1^6E_g$    |       |             |  |  |  |  |  |  |
| 12                                                                         | $\Gamma_{6g}$ | 2.533 | 323  | 36737 | 0.01 | 62.48 | $2^6T_{1g}$ | 14.54 | $1^6T_{1g}$ | 11.49 | $1^6T_{2g}$ |       |             |  |  |  |  |  |  |
| 13                                                                         | $\Gamma_{7g}$ | 2.531 | 323  | 36746 |      | 38.67 | $2^6T_{1g}$ | 35.03 | $1^6T_{2g}$ | 15.84 | $1^6T_{1g}$ |       |             |  |  |  |  |  |  |
| 25                                                                         | $\Gamma_{8g}$ | 2.531 | 323  | 37360 | 0.05 | 46.61 | $2^6T_{1g}$ | 18.99 | $1^6T_{2g}$ | 18.75 | $1^6E_g$    | 10.83 | $2^6T_{2g}$ |  |  |  |  |  |  |
| 26                                                                         | $\Gamma_{8g}$ | 2.531 | 325  | 37444 | 0.02 | 53.20 | $1^6T_{2g}$ | 17.28 | $1^6E_g$    | 10.93 | $2^6T_{1g}$ | 10.85 | $1^6T_{1g}$ |  |  |  |  |  |  |
| 27                                                                         | $\Gamma_{8g}$ | 2.530 | 325  | 38181 | 0.05 | 31.36 | $1^6E_g$    | 29.60 | $1^6T_{2g}$ | 24.83 | $2^6T_{1g}$ |       |             |  |  |  |  |  |  |
| 13                                                                         | $\Gamma_{6g}$ | 2.530 | 322  | 38215 | 0.03 | 46.04 | $1^6T_{2g}$ | 30.21 | $1^6E_g$    | 12.06 | $1^6T_{1g}$ |       |             |  |  |  |  |  |  |
| 14                                                                         | $\Gamma_{7g}$ | 2.531 | 322  | 38366 |      | 64.08 | $2^6T_{1g}$ | 13.58 | $1^6T_{2g}$ | 10.50 | $1^6E_g$    |       |             |  |  |  |  |  |  |
| 28                                                                         | $\Gamma_{8g}$ | 2.531 | 321  | 38550 | 0.02 | 80.26 | $2^6T_{2g}$ | 10.11 | $2^6T_{1g}$ |       |             |       |             |  |  |  |  |  |  |
| 14                                                                         | $\Gamma_{6g}$ | 2.530 | 322  | 38728 | 0.06 | 48.40 | $1^6T_{2g}$ | 33.12 | $1^6E_g$    |       |             |       |             |  |  |  |  |  |  |
| 29                                                                         | $\Gamma_{8g}$ | 2.531 | 323  | 38890 | 0.09 | 67.08 | $1^6T_{2g}$ | 21.18 | $2^6T_{1g}$ |       |             |       |             |  |  |  |  |  |  |
| 15                                                                         | $\Gamma_{7g}$ | 2.530 | 311  | 39490 | 0.01 | 52.44 | $1^6E_g$    | 36.80 | $2^6T_{1g}$ |       |             |       |             |  |  |  |  |  |  |
| 30                                                                         | $\Gamma_{8g}$ | 2.530 | 323  | 39823 | 0.09 | 36.71 | $2^6T_{1g}$ | 36.15 | $1^6E_g$    | 23.76 | $1^6T_{2g}$ |       |             |  |  |  |  |  |  |
| 31                                                                         | $\Gamma_{8g}$ | 2.531 | 322  | 39959 | 0.06 | 61.62 | $2^6T_{1g}$ | 23.00 | $1^6E_g$    | 11.26 | $1^6T_{2g}$ |       |             |  |  |  |  |  |  |
| 15                                                                         | $\Gamma_{6g}$ | 2.531 | 322  | 40038 |      | 83.36 | $2^6T_{2g}$ | 10.89 | $2^6T_{1g}$ |       |             |       |             |  |  |  |  |  |  |
| 32                                                                         | $\Gamma_{8g}$ | 2.531 | 323  | 40041 | 0.01 | 82.19 | $2^6T_{2g}$ | 10.29 | $2^6T_{1g}$ |       |             |       |             |  |  |  |  |  |  |
| 16                                                                         | $\Gamma_{6g}$ | 2.530 | 518  | 41803 | 0.01 | 89.49 | $2^6T_{2g}$ |       |             |       |             |       |             |  |  |  |  |  |  |
| 16                                                                         | $\Gamma_{7g}$ | 2.530 | 344  | 41807 |      | 88.74 | $2^6T_{2g}$ |       |             |       |             |       |             |  |  |  |  |  |  |
| 33                                                                         | $\Gamma_{8g}$ | 2.531 | 297  | 41839 | 0.01 | 89.06 | $2^6T_{2g}$ |       |             |       |             |       |             |  |  |  |  |  |  |
| $4f^6(^7F_J)(5dt_{2g}^1 + ITE_{a_1g}^1)$ High-Spin coupling <sup>d,e</sup> |               |       |      |       |      |       |             |       |             |       |             |       |             |  |  |  |  |  |  |
| 34                                                                         | $\Gamma_{8g}$ | 2.575 | 835  | 42590 | 0.53 | 41.77 | $3^8T_{1g}$ | 26.04 | $2^8E_g$    | 22.72 | $3^8T_{2g}$ |       |             |  |  |  |  |  |  |
| 35                                                                         | $\Gamma_{8g}$ | 2.575 | 473  | 42750 | 0.22 | 39.83 | $3^8T_{2g}$ | 29.57 | $3^8T_{1g}$ | 23.08 | $2^8E_g$    |       |             |  |  |  |  |  |  |
| 17                                                                         | $\Gamma_{7g}$ | 2.585 | 403  | 43066 | 0.58 | 65.14 | $3^8T_{2g}$ | 13.67 | $4^8T_{1g}$ | 11.60 | $2^8E_g$    |       |             |  |  |  |  |  |  |
| 36                                                                         | $\Gamma_{8g}$ | 2.584 | 418  | 43160 | 0.71 | 39.35 | $3^8T_{2g}$ | 33.57 | $2^8E_g$    | 19.55 | $3^8T_{1g}$ |       |             |  |  |  |  |  |  |
| 17                                                                         | $\Gamma_{6g}$ | 2.583 | 403  | 43182 | 0.22 | 53.53 | $3^8T_{1g}$ | 23.37 | $2^8E_g$    | 11.37 | $3^8T_{2g}$ |       |             |  |  |  |  |  |  |
| 18                                                                         | $\Gamma_{7g}$ | 2.583 | 484  | 43559 | 1.14 | 40.10 | $3^8T_{2g}$ | 31.09 | $2^8E_g$    | 18.26 | $4^8T_{1g}$ |       |             |  |  |  |  |  |  |
| 18                                                                         | $\Gamma_{6g}$ | 2.581 | 491  | 43666 | 0.38 | 49.53 | $3^8T_{1g}$ | 30.76 | $2^8E_g$    |       |             |       |             |  |  |  |  |  |  |
| 37                                                                         | $\Gamma_{8g}$ | 2.588 | 318  | 43902 | 0.68 | 45.68 | $3^8T_{2g}$ | 32.41 | $3^8T_{1g}$ |       |             |       |             |  |  |  |  |  |  |
| 38                                                                         | $\Gamma_{8g}$ | 2.625 | 1046 | 44349 | 3.07 | 31.32 | $3^8T_{1g}$ | 27.83 | $3^8T_{2g}$ | 22.66 | $4^8T_{1g}$ | 13.94 | $2^8E_g$    |  |  |  |  |  |  |
| 39                                                                         | $\Gamma_{8g}$ | 2.593 | 274  | 44540 | 1.45 | 43.98 | $3^8T_{1g}$ | 20.78 | $3^8T_{2g}$ | 16.63 | $2^8E_g$    | 12.00 | $4^8T_{1g}$ |  |  |  |  |  |  |
| 40                                                                         | $\Gamma_{8g}$ | 2.599 | 252  | 44844 | 4.66 | 33.29 | $3^8T_{2g}$ | 29.59 | $4^8T_{1g}$ | 24.95 | $3^8T_{1g}$ |       |             |  |  |  |  |  |  |
| 19                                                                         | $\Gamma_{7g}$ | 2.586 | 371  | 44883 | 3.71 | 57.63 | $4^8T_{1g}$ | 21.42 | $3^8T_{1g}$ | 12.04 | $2^8E_g$    |       |             |  |  |  |  |  |  |
| 19                                                                         | $\Gamma_{6g}$ | 2.587 | 380  | 45085 | 0.71 | 53.75 | $3^8T_{2g}$ | 22.44 | $3^8T_{1g}$ | 18.82 | $4^8T_{1g}$ |       |             |  |  |  |  |  |  |
| 20                                                                         | $\Gamma_{7g}$ | 2.584 | 402  | 45137 | 1.12 | 61.97 | $3^8T_{1g}$ | 26.02 | $3^8T_{2g}$ |       |             |       |             |  |  |  |  |  |  |
| 41                                                                         | $\Gamma_{8g}$ | 2.625 | 939  | 45234 | 2.60 | 32.13 | $2^8E_g$    | 26.74 | $4^8T_{1g}$ | 18.42 | $3^8T_{2g}$ | 17.20 | $3^8T_{1g}$ |  |  |  |  |  |  |
| 20                                                                         | $\Gamma_{6g}$ | 2.588 | 355  | 45535 | 0.13 | 24.29 | $5^8T_{1g}$ | 15.01 | $4^8T_{2g}$ | 14.93 | $3^8E_g$    | 13.91 | $3^8T_{2g}$ |  |  |  |  |  |  |
| 42                                                                         | $\Gamma_{8g}$ | 2.625 | 905  | 45659 | 0.18 | 24.17 | $5^8T_{1g}$ | 17.94 | $4^8T_{2g}$ | 16.21 | $3^8E_g$    | 14.29 | $4^8T_{1g}$ |  |  |  |  |  |  |
| 21                                                                         | $\Gamma_{7g}$ | 2.590 | 330  | 45734 | 1.20 | 32.24 | $3^8T_{1g}$ | 23.84 | $4^8T_{1g}$ | 13.15 | $2^8E_g$    | 12.75 | $3^8T_{2g}$ |  |  |  |  |  |  |
|                                                                            |               |       |      |       |      | 10.94 | $4^8T_{2g}$ |       |             |       |             |       |             |  |  |  |  |  |  |
| 21                                                                         | $\Gamma_{6g}$ | 2.586 | 401  | 45735 | 0.40 | 46.60 | $3^8T_{2g}$ | 14.70 | $3^8T_{1g}$ | 14.52 | $3^8E_g$    |       |             |  |  |  |  |  |  |
| 22                                                                         | $\Gamma_{7g}$ | 2.586 | 403  | 45810 | 0.20 | 22.05 | $3^8E_g$    | 22.03 | $4^8T_{2g}$ | 19.75 | $5^8T_{1g}$ | 10.14 | $3^8T_{2g}$ |  |  |  |  |  |  |
| 43                                                                         | $\Gamma_{8g}$ | 2.602 | 265  | 45963 | 0.84 | 32.18 | $2^8E_g$    | 26.86 | $3^8T_{2g}$ | 11.25 | $4^8T_{1g}$ | 10.80 | $3^8T_{1g}$ |  |  |  |  |  |  |
| 22                                                                         | $\Gamma_{6g}$ | 2.591 | 326  | 46276 | 4.03 | 54.77 | $4^8T_{1g}$ | 15.64 | $2^8E_g$    | 15.29 | $3^8T_{1g}$ |       |             |  |  |  |  |  |  |
| 44                                                                         | $\Gamma_{8g}$ | 2.604 | 253  | 46296 | 3.73 | 25.72 | $3^8T_{1g}$ | 25.14 | $4^8T_{1g}$ | 18.37 | $2^8E_g$    | 14.21 | $5^8T_{1g}$ |  |  |  |  |  |  |
| 45                                                                         | $\Gamma_{8g}$ | 2.593 | 311  | 46298 | 1.89 | 24.76 | $3^8E_g$    | 21.20 | $4^8T_{2g}$ | 18.17 | $5^8T_{1g}$ | 16.58 | $4^8T_{1g}$ |  |  |  |  |  |  |
| 46                                                                         | $\Gamma_{8g}$ | 2.594 | 301  | 46371 | 0.79 | 19.49 | $4^8T_{2g}$ | 18.11 | $3^8T_{2g}$ | 17.12 | $3^8E_g$    | 13.94 | $2^8E_g$    |  |  |  |  |  |  |
| 23                                                                         | $\Gamma_{7g}$ | 2.593 | 312  | 46372 | 1.06 | 34.96 | $4^8T_{1g}$ | 13.88 | $3^8T_{2g}$ | 13.68 | $4^8T_{2g}$ | 12.30 | $5^8T_{1g}$ |  |  |  |  |  |  |
| 23                                                                         | $\Gamma_{6g}$ | 2.595 | 314  | 46574 | 0.28 | 42.24 | $4^8T_{2g}$ |       |             |       |             |       |             |  |  |  |  |  |  |
| 47                                                                         | $\Gamma_{8g}$ | 2.592 | 313  | 46630 | 0.60 | 29.18 | $3^8T_{2g}$ | 14.65 | $4^8T_{2g}$ | 14.16 | $2^8E_g$    | 12.31 | $3^8T_{1g}$ |  |  |  |  |  |  |
|                                                                            |               |       |      |       |      | 10.15 | $3^8E_g$    |       |             |       |             |       |             |  |  |  |  |  |  |
| 48                                                                         | $\Gamma_{8g}$ | 2.592 | 313  | 46770 | 2.05 | 25.86 | $4^8T_{1g}$ | 16.31 | $3^8T_{2g}$ | 16.07 | $3^8E_g$    | 15.21 | $3^8T_{1g}$ |  |  |  |  |  |  |
|                                                                            |               |       |      |       |      | 10.89 | $2^8E_g$    |       |             |       |             |       |             |  |  |  |  |  |  |
| 24                                                                         | $\Gamma_{7g}$ | 2.595 | 316  | 47069 | 1.28 | 34.54 | $5^8T_{1g}$ | 17.92 | $4^8T_{1g}$ |       |             |       |             |  |  |  |  |  |  |
| 24                                                                         | $\Gamma_{6g}$ | 2.594 | 307  | 47363 |      | 40.88 | $5^8T_{2g}$ | 39.11 | $6^8T_{1g}$ |       |             |       |             |  |  |  |  |  |  |

|    |               |       |      |       |      |       |             |       |             |       |             |       |             |
|----|---------------|-------|------|-------|------|-------|-------------|-------|-------------|-------|-------------|-------|-------------|
| 25 | $\Gamma_{7g}$ | 2.594 | 313  | 47373 | 0.19 | 21.72 | $5^8T_{1g}$ | 14.76 | $3^8T_{1g}$ | 10.65 | $4^8T_{2g}$ |       |             |
| 49 | $\Gamma_{8g}$ | 2.595 | 314  | 47385 | 0.25 | 21.65 | $5^8T_{1g}$ | 19.35 | $3^8E_g$    | 13.63 | $4^8T_{2g}$ |       |             |
| 50 | $\Gamma_{8g}$ | 2.593 | 313  | 47451 | 0.70 | 21.83 | $3^8T_{1g}$ | 20.69 | $3^8T_{2g}$ | 15.39 | $2^8E_g$    | 13.41 | $4^8T_{1g}$ |
|    |               |       |      |       |      | 11.80 | $5^8T_{1g}$ |       |             |       |             |       |             |
| 51 | $\Gamma_{8g}$ | 2.593 | 311  | 47516 | 1.27 | 31.04 | $4^8T_{2g}$ | 26.34 | $3^8E_g$    | 15.79 | $4^8T_{1g}$ |       |             |
| 25 | $\Gamma_{6g}$ | 2.588 | 279  | 47521 | 0.12 | 23.91 | $3^8T_{2g}$ | 14.56 | $4^8T_{2g}$ | 14.10 | $2^8E_g$    | 10.14 | $5^8T_{1g}$ |
| 52 | $\Gamma_{8g}$ | 2.593 | 312  | 47636 | 2.70 | 31.91 | $4^8T_{1g}$ | 13.01 | $3^8T_{1g}$ | 11.89 | $3^8E_g$    |       |             |
| 26 | $\Gamma_{7g}$ | 2.593 | 313  | 47640 | 0.08 | 28.84 | $3^8T_{1g}$ | 20.89 | $3^8E_g$    | 15.29 | $3^8T_{2g}$ | 14.25 | $2^8E_g$    |
| 26 | $\Gamma_{6g}$ | 2.573 | 555  | 47805 | 0.07 | 37.76 | $4^8T_{2g}$ | 14.42 | $3^8T_{2g}$ |       |             |       |             |
| 53 | $\Gamma_{8g}$ | 2.583 | 271  | 47848 | 0.55 | 31.52 | $5^8T_{2g}$ | 28.15 | $6^8T_{1g}$ |       |             |       |             |
| 54 | $\Gamma_{8g}$ | 2.588 | 292  | 47980 | 6.27 | 49.71 | $4^8T_{1g}$ | 13.80 | $5^8T_{1g}$ | 10.35 | $3^8T_{1g}$ |       |             |
| 27 | $\Gamma_{6g}$ | 2.565 | 351  | 48245 | 3.55 | 73.50 | $4^8T_{1g}$ | 12.95 | $3^8T_{2g}$ |       |             |       |             |
| 55 | $\Gamma_{8g}$ | 2.569 | 326  | 48284 | 4.76 | 48.86 | $4^8T_{1g}$ | 19.28 | $4^8T_{2g}$ |       |             |       |             |
| 27 | $\Gamma_{7g}$ | 2.558 | 336  | 48456 | 0.02 | 47.62 | $5^8T_{2g}$ | 10.74 | $6^8T_{1g}$ |       |             |       |             |
| 56 | $\Gamma_{8g}$ | 2.565 | 302  | 48545 | 0.85 | 52.88 | $6^8T_{1g}$ | 33.94 | $5^8T_{2g}$ |       |             |       |             |
| 28 | $\Gamma_{6g}$ | 2.586 | 266  | 48712 | 0.26 | 26.52 | $5^8T_{1g}$ | 24.21 | $3^8E_g$    | 22.73 | $4^8T_{2g}$ |       |             |
| 57 | $\Gamma_{8g}$ | 2.564 | 288  | 48809 | 0.88 | 43.27 | $4^8T_{2g}$ | 36.77 | $5^8T_{1g}$ |       |             |       |             |
| 28 | $\Gamma_{7g}$ | 2.583 | 245  | 49062 | 0.04 | 63.23 | $4^8T_{2g}$ |       |             |       |             |       |             |
| 29 | $\Gamma_{6g}$ | 2.558 | 320  | 49105 | 0.42 | 32.47 | $5^8T_{1g}$ | 16.56 | $3^8E_g$    |       |             |       |             |
| 58 | $\Gamma_{8g}$ | 2.547 | 351  | 49138 | 0.28 | 42.10 | $4^8T_{2g}$ | 14.23 | $3^8E_g$    |       |             |       |             |
| 59 | $\Gamma_{8g}$ | 2.546 | 329  | 49254 | 0.20 | 50.63 | $6^8T_{1g}$ | 25.55 | $5^8T_{2g}$ |       |             |       |             |
| 30 | $\Gamma_{6g}$ | 2.550 | 393  | 49304 | 0.08 | 50.30 | $5^8T_{2g}$ | 35.43 | $6^8T_{1g}$ |       |             |       |             |
| 60 | $\Gamma_{8g}$ | 2.545 | 359  | 49393 | 0.33 | 50.40 | $5^8T_{1g}$ | 29.41 | $4^8T_{2g}$ | 11.94 | $3^8E_g$    |       |             |
| 30 | $\Gamma_{7g}$ | 2.555 | 454  | 49477 | 0.19 | 55.74 | $5^8T_{1g}$ | 20.75 | $3^8E_g$    |       |             |       |             |
| 62 | $\Gamma_{8g}$ | 2.575 | 965  | 50122 | 0.13 | 53.69 | $6^8T_{1g}$ | 32.25 | $5^8T_{2g}$ |       |             |       |             |
| 31 | $\Gamma_{7g}$ | 2.560 | 331  | 50207 | 0.01 | 42.42 | $4^8T_{2g}$ | 17.30 | $3^8E_g$    |       |             |       |             |
| 29 | $\Gamma_{7g}$ | 2.546 | 334  | 49317 | 0.03 | 42.86 | $5^8T_{2g}$ | 38.60 | $6^8T_{1g}$ |       |             |       |             |
| 61 | $\Gamma_{8g}$ | 2.525 | 984  | 49989 | 0.09 | 45.00 | $4^8T_{2g}$ | 23.25 | $3^8E_g$    |       |             |       |             |
| 31 | $\Gamma_{6g}$ | 2.541 | 371  | 50076 | 0.05 | 38.52 | $6^8T_{1g}$ | 17.59 | $5^8T_{2g}$ |       |             |       |             |
| 63 | $\Gamma_{8g}$ | 2.546 | 301  | 50282 | 0.10 | 61.13 | $5^8T_{2g}$ | 36.60 | $6^8T_{1g}$ |       |             |       |             |
| 32 | $\Gamma_{6g}$ | 2.525 | 906  | 50413 | 0.09 | 40.06 | $4^8T_{2g}$ | 24.51 | $5^8T_{1g}$ |       |             |       |             |
| 64 | $\Gamma_{8g}$ | 2.546 | 299  | 50431 | 0.26 | 33.40 | $5^8T_{1g}$ | 30.39 | $4^8T_{2g}$ | 16.44 | $3^8E_g$    |       |             |
| 65 | $\Gamma_{8g}$ | 2.538 | 434  | 50590 | 0.36 | 48.11 | $5^8T_{1g}$ | 25.52 | $3^8E_g$    | 15.65 | $4^8T_{2g}$ |       |             |
| 32 | $\Gamma_{7g}$ | 2.575 | 1253 | 50799 | 0.11 | 43.53 | $5^8T_{1g}$ |       |             |       |             |       |             |
| 33 | $\Gamma_{6g}$ | 2.521 | 1281 | 50894 | 0.10 | 48.10 | $5^8T_{1g}$ | 14.27 | $3^8E_g$    |       |             |       |             |
| 33 | $\Gamma_{7g}$ | 2.531 | 469  | 51124 | 0.05 | 46.76 | $6^8T_{1g}$ | 19.23 | $5^8T_{2g}$ |       |             |       |             |
| 66 | $\Gamma_{8g}$ | 2.540 | 335  | 51191 | 0.25 | 48.95 | $5^8T_{1g}$ | 15.35 | $3^8E_g$    |       |             |       |             |
| 67 | $\Gamma_{8g}$ | 2.536 | 489  | 51249 | 0.07 | 52.25 | $5^8T_{2g}$ | 26.72 | $6^8T_{1g}$ |       |             |       |             |
| 68 | $\Gamma_{8g}$ | 2.540 | 512  | 51380 | 0.10 | 60.65 | $5^8T_{2g}$ | 38.79 | $6^8T_{1g}$ |       |             |       |             |
| 34 | $\Gamma_{6g}$ | 2.542 | 527  | 51385 | 0.10 | 62.23 | $6^8T_{1g}$ | 34.15 | $5^8T_{2g}$ |       |             |       |             |
| 34 | $\Gamma_{7g}$ | 2.517 | 521  | 52120 | 0.04 | 44.44 | $6^8T_{1g}$ | 38.65 | $5^8T_{2g}$ |       |             |       |             |
| 69 | $\Gamma_{8g}$ | 2.519 | 532  | 52194 | 0.06 | 49.94 | $5^8T_{2g}$ | 30.69 | $6^8T_{1g}$ |       |             |       |             |
| 35 | $\Gamma_{7g}$ | 2.523 | 916  | 52400 | 0.05 | 53.93 | $6^8T_{1g}$ | 45.91 | $5^8T_{2g}$ |       |             |       |             |
| 35 | $\Gamma_{6g}$ | 2.525 | 696  | 52483 | 0.02 | 54.38 | $5^8T_{2g}$ | 21.25 | $6^8T_{1g}$ |       |             |       |             |
| 70 | $\Gamma_{8g}$ | 2.525 | 792  | 52496 | 0.13 | 63.59 | $6^8T_{1g}$ | 36.31 | $5^8T_{2g}$ |       |             |       |             |

 $4f^7$  excited states $4f^7(^6P_{3/2,5/2,7/2})^c$ 

|   |               |       |     |       |       |             |       |             |  |  |  |  |  |
|---|---------------|-------|-----|-------|-------|-------------|-------|-------------|--|--|--|--|--|
| 2 | $\Gamma_{8u}$ | 2.556 | 321 | 30809 | 89.37 | $1^6T_{1u}$ |       |             |  |  |  |  |  |
| 2 | $\Gamma_{7u}$ | 2.556 | 320 | 30815 | 89.68 | $1^6T_{1u}$ |       |             |  |  |  |  |  |
| 3 | $\Gamma_{8u}$ | 2.556 | 321 | 31194 | 94.10 | $1^6T_{1u}$ |       |             |  |  |  |  |  |
| 2 | $\Gamma_{6u}$ | 2.556 | 320 | 31428 | 85.14 | $1^6T_{1u}$ | 12.09 | $3^6T_{2u}$ |  |  |  |  |  |
| 4 | $\Gamma_{8u}$ | 2.556 | 320 | 31436 | 85.19 | $1^6T_{1u}$ |       |             |  |  |  |  |  |
| 3 | $\Gamma_{7u}$ | 2.556 | 321 | 31449 | 85.26 | $1^6T_{1u}$ | 10.79 | $2^6E_u$    |  |  |  |  |  |

 $4f^7(^6I_{7/2,9/2,11/2,13/2,15/2,17/2})^c$ 

|   |               |       |     |       |       |             |       |          |  |  |  |  |  |
|---|---------------|-------|-----|-------|-------|-------------|-------|----------|--|--|--|--|--|
| 3 | $\Gamma_{6u}$ | 2.555 | 321 | 35200 | 75.84 | $1^6T_{2u}$ | 21.32 | $1^6E_u$ |  |  |  |  |  |
| 5 | $\Gamma_{8u}$ | 2.555 | 321 | 35207 | 81.55 | $1^6T_{2u}$ | 15.16 | $1^6E_u$ |  |  |  |  |  |
| 4 | $\Gamma_{7u}$ | 2.555 | 321 | 35219 | 93.60 | $1^6T_{2u}$ |       |          |  |  |  |  |  |
| 6 | $\Gamma_{8u}$ | 2.555 | 321 | 35227 | 80.56 | $1^6T_{2u}$ | 12.84 | $1^6E_u$ |  |  |  |  |  |
| 4 | $\Gamma_{6u}$ | 2.555 | 321 | 35238 | 88.00 | $1^6T_{2u}$ |       |          |  |  |  |  |  |

|                                             |       |     |       |       |                |       |                |       |                |       |                |  |  |  |  |  |  |  |  |  |
|---------------------------------------------|-------|-----|-------|-------|----------------|-------|----------------|-------|----------------|-------|----------------|--|--|--|--|--|--|--|--|--|
| 7 $\Gamma_{8u}$                             | 2.555 | 321 | 35239 | 90.00 | 1 ${}^6T_{2u}$ |       |                |       |                |       |                |  |  |  |  |  |  |  |  |  |
| 5 $\Gamma_{7u}$                             | 2.555 | 322 | 35438 | 83.34 | 1 ${}^6E_u$    | 13.74 | 2 ${}^6T_{1u}$ |       |                |       |                |  |  |  |  |  |  |  |  |  |
| 8 $\Gamma_{8u}$                             | 2.555 | 321 | 35456 | 49.53 | 1 ${}^6E_u$    | 25.17 | 2 ${}^6T_{2u}$ | 20.16 | 1 ${}^6A_{2u}$ |       |                |  |  |  |  |  |  |  |  |  |
| 9 $\Gamma_{8u}$                             | 2.555 | 321 | 35500 | 61.53 | 1 ${}^6E_u$    | 14.74 | 2 ${}^6T_{2u}$ | 12.28 | 1 ${}^6T_{2u}$ |       |                |  |  |  |  |  |  |  |  |  |
| 5 $\Gamma_{6u}$                             | 2.556 | 320 | 35515 | 52.30 | 2 ${}^6T_{2u}$ | 18.56 | 1 ${}^6A_{2u}$ | 10.53 | 2 ${}^6T_{1u}$ | 10.08 | 1 ${}^6E_u$    |  |  |  |  |  |  |  |  |  |
| 10 $\Gamma_{8u}$                            | 2.557 | 320 | 35534 | 67.19 | 2 ${}^6T_{2u}$ | 26.86 | 2 ${}^6T_{1u}$ |       |                |       |                |  |  |  |  |  |  |  |  |  |
| 6 $\Gamma_{7u}$                             | 2.557 | 320 | 35535 | 65.71 | 2 ${}^6T_{2u}$ | 29.35 | 2 ${}^6T_{1u}$ |       |                |       |                |  |  |  |  |  |  |  |  |  |
| 6 $\Gamma_{6u}$                             | 2.556 | 321 | 35541 | 69.71 | 2 ${}^6T_{2u}$ | 12.94 | 2 ${}^6T_{1u}$ |       |                |       |                |  |  |  |  |  |  |  |  |  |
| 11 $\Gamma_{8u}$                            | 2.557 | 321 | 35560 | 43.46 | 2 ${}^6T_{1u}$ | 33.19 | 1 ${}^6A_{1u}$ | 14.65 | 2 ${}^6T_{2u}$ |       |                |  |  |  |  |  |  |  |  |  |
| 12 $\Gamma_{8u}$                            | 2.557 | 320 | 35592 | 47.53 | 2 ${}^6T_{1u}$ | 32.75 | 2 ${}^6T_{2u}$ | 11.11 | 1 ${}^6E_u$    |       |                |  |  |  |  |  |  |  |  |  |
| 7 $\Gamma_{7u}$                             | 2.557 | 321 | 35594 | 55.79 | 1 ${}^6A_{1u}$ | 25.47 | 2 ${}^6T_{1u}$ | 13.17 | 2 ${}^6T_{2u}$ |       |                |  |  |  |  |  |  |  |  |  |
| 7 $\Gamma_{6u}$                             | 2.556 | 321 | 35603 | 35.44 | 1 ${}^6E_u$    | 34.28 | 2 ${}^6T_{2u}$ | 17.18 | 2 ${}^6T_{1u}$ |       |                |  |  |  |  |  |  |  |  |  |
| 13 $\Gamma_{8u}$                            | 2.556 | 321 | 35643 | 26.51 | 2 ${}^6T_{2u}$ | 21.32 | 1 ${}^6E_u$    | 19.98 | 1 ${}^6A_{1u}$ | 11.30 | 1 ${}^6T_{2u}$ |  |  |  |  |  |  |  |  |  |
|                                             |       |     |       | 10.47 | 2 ${}^6T_{1u}$ | 10.10 | 1 ${}^6A_{2u}$ |       |                |       |                |  |  |  |  |  |  |  |  |  |
| 8 $\Gamma_{6u}$                             | 2.556 | 321 | 35650 | 46.03 | 1 ${}^6A_{2u}$ | 25.28 | 1 ${}^6E_u$    | 15.30 | 2 ${}^6T_{1u}$ | 12.96 | 1 ${}^6T_{2u}$ |  |  |  |  |  |  |  |  |  |
| 8 $\Gamma_{7u}$                             | 2.556 | 321 | 35664 | 72.30 | 2 ${}^6T_{1u}$ |       |                |       |                |       |                |  |  |  |  |  |  |  |  |  |
| 14 $\Gamma_{8u}$                            | 2.556 | 321 | 35685 | 30.24 | 1 ${}^6A_{2u}$ | 26.55 | 2 ${}^6T_{1u}$ | 17.77 | 2 ${}^6T_{2u}$ | 10.46 | 1 ${}^6A_{1u}$ |  |  |  |  |  |  |  |  |  |
| 15 $\Gamma_{8u}$                            | 2.557 | 321 | 35713 | 47.09 | 2 ${}^6T_{1u}$ | 26.04 | 2 ${}^6T_{2u}$ | 20.59 | 1 ${}^6A_{2u}$ |       |                |  |  |  |  |  |  |  |  |  |
| 16 $\Gamma_{8u}$                            | 2.556 | 321 | 35779 | 48.58 | 2 ${}^6T_{2u}$ | 37.39 | 2 ${}^6T_{1u}$ |       |                |       |                |  |  |  |  |  |  |  |  |  |
| 9 $\Gamma_{6u}$                             | 2.556 | 321 | 35815 | 41.55 | 2 ${}^6T_{1u}$ | 38.93 | 2 ${}^6T_{2u}$ | 16.64 | 1 ${}^6A_{2u}$ |       |                |  |  |  |  |  |  |  |  |  |
| 17 $\Gamma_{8u}$                            | 2.557 | 321 | 35842 | 48.33 | 2 ${}^6T_{1u}$ | 26.15 | 1 ${}^6A_{1u}$ | 18.56 | 2 ${}^6T_{2u}$ |       |                |  |  |  |  |  |  |  |  |  |
| 9 $\Gamma_{7u}$                             | 2.557 | 321 | 35846 | 56.08 | 2 ${}^6T_{1u}$ | 29.68 | 1 ${}^6A_{1u}$ | 12.22 | 2 ${}^6T_{2u}$ |       |                |  |  |  |  |  |  |  |  |  |
| $4f^7({}^6D_{1/2,3/2,5/2,7/2})^c$           |       |     |       |       |                |       |                |       |                |       |                |  |  |  |  |  |  |  |  |  |
| 18 $\Gamma_{8u}$                            | 2.555 | 318 | 37970 | 75.16 | 3 ${}^6T_{2u}$ | 21.53 | 2 ${}^6E_u$    |       |                |       |                |  |  |  |  |  |  |  |  |  |
| 10 $\Gamma_{6u}$                            | 2.556 | 321 | 38067 | 91.35 | 2 ${}^6E_u$    |       |                |       |                |       |                |  |  |  |  |  |  |  |  |  |
| 19 $\Gamma_{8u}$                            | 2.555 | 319 | 38077 | 52.48 | 2 ${}^6E_u$    | 44.18 | 3 ${}^6T_{2u}$ |       |                |       |                |  |  |  |  |  |  |  |  |  |
| 11 $\Gamma_{6u}$                            | 2.555 | 317 | 38310 | 95.44 | 3 ${}^6T_{2u}$ |       |                |       |                |       |                |  |  |  |  |  |  |  |  |  |
| 20 $\Gamma_{8u}$                            | 2.555 | 319 | 38547 | 53.00 | 3 ${}^6T_{2u}$ | 38.68 | 2 ${}^6E_u$    |       |                |       |                |  |  |  |  |  |  |  |  |  |
| 21 $\Gamma_{8u}$                            | 2.555 | 320 | 38757 | 62.34 | 2 ${}^6E_u$    | 23.24 | 3 ${}^6T_{2u}$ | 10.80 | 1 ${}^6T_{1u}$ |       |                |  |  |  |  |  |  |  |  |  |
| 10 $\Gamma_{7u}$                            | 2.556 | 321 | 38807 | 81.49 | 2 ${}^6E_u$    | 11.78 | 1 ${}^6T_{1u}$ |       |                |       |                |  |  |  |  |  |  |  |  |  |
| 12 $\Gamma_{6u}$                            | 2.555 | 317 | 38925 | 80.69 | 3 ${}^6T_{2u}$ | 12.31 | 1 ${}^6T_{1u}$ |       |                |       |                |  |  |  |  |  |  |  |  |  |
| 22 $\Gamma_{8u}$                            | 2.556 | 317 | 38975 | 78.78 | 3 ${}^6T_{2u}$ | 11.38 | 1 ${}^6T_{1u}$ |       |                |       |                |  |  |  |  |  |  |  |  |  |
| 11 $\Gamma_{7u}$                            | 2.556 | 317 | 39028 | 84.34 | 3 ${}^6T_{2u}$ | 10.67 | 1 ${}^6T_{1u}$ |       |                |       |                |  |  |  |  |  |  |  |  |  |
| $4f^7({}^6G_{3/2,5/2,7/2,9/2,11/2,13/2})^c$ |       |     |       |       |                |       |                |       |                |       |                |  |  |  |  |  |  |  |  |  |
| 23 $\Gamma_{8u}$                            | 2.554 | 323 | 48442 | 56.69 | 4 ${}^6T_{2u}$ | 20.47 | 2 ${}^6A_{2u}$ | 12.50 | 3 ${}^6E_u$    |       |                |  |  |  |  |  |  |  |  |  |
| 13 $\Gamma_{6u}$                            | 2.555 | 323 | 48461 | 49.25 | 4 ${}^6T_{2u}$ | 18.14 | 2 ${}^6A_{2u}$ | 17.03 | 3 ${}^6E_u$    | 10.61 | 5 ${}^6T_{2u}$ |  |  |  |  |  |  |  |  |  |
| 24 $\Gamma_{8u}$                            | 2.555 | 322 | 48511 | 34.25 | 4 ${}^6T_{2u}$ | 26.51 | 3 ${}^6E_u$    | 20.63 | 3 ${}^6T_{1u}$ |       |                |  |  |  |  |  |  |  |  |  |
| 14 $\Gamma_{6u}$                            | 2.555 | 321 | 48649 | 33.97 | 3 ${}^6E_u$    | 30.54 | 5 ${}^6T_{2u}$ | 20.49 | 4 ${}^6T_{2u}$ |       |                |  |  |  |  |  |  |  |  |  |
| 12 $\Gamma_{7u}$                            | 2.554 | 320 | 48703 | 55.93 | 3 ${}^6T_{1u}$ | 31.92 | 3 ${}^6E_u$    |       |                |       |                |  |  |  |  |  |  |  |  |  |
| 25 $\Gamma_{8u}$                            | 2.555 | 320 | 48765 | 29.30 | 3 ${}^6T_{1u}$ | 22.02 | 3 ${}^6E_u$    | 16.17 | 2 ${}^6A_{1u}$ | 10.84 | 4 ${}^6T_{1u}$ |  |  |  |  |  |  |  |  |  |
|                                             |       |     |       | 10.81 | 5 ${}^6T_{2u}$ |       |                |       |                |       |                |  |  |  |  |  |  |  |  |  |
| 26 $\Gamma_{8u}$                            | 2.555 | 322 | 48794 | 36.75 | 3 ${}^6T_{1u}$ | 28.14 | 5 ${}^6T_{2u}$ | 13.43 | 3 ${}^6E_u$    | 12.12 | 4 ${}^6T_{2u}$ |  |  |  |  |  |  |  |  |  |
| 15 $\Gamma_{6u}$                            | 2.554 | 321 | 48794 | 67.38 | 3 ${}^6T_{1u}$ | 16.52 | 5 ${}^6T_{2u}$ |       |                |       |                |  |  |  |  |  |  |  |  |  |
| 13 $\Gamma_{7u}$                            | 2.555 | 321 | 48833 | 29.12 | 3 ${}^6T_{1u}$ | 28.55 | 5 ${}^6T_{2u}$ | 17.22 | 2 ${}^6A_{1u}$ | 14.76 | 4 ${}^6T_{2u}$ |  |  |  |  |  |  |  |  |  |
| 27 $\Gamma_{8u}$                            | 2.555 | 321 | 49003 | 40.36 | 4 ${}^6T_{2u}$ | 17.26 | 4 ${}^6T_{1u}$ | 15.24 | 3 ${}^6E_u$    | 10.12 | 3 ${}^6T_{1u}$ |  |  |  |  |  |  |  |  |  |
| 28 $\Gamma_{8u}$                            | 2.557 | 321 | 49255 | 71.56 | 4 ${}^6T_{1u}$ | 13.82 | 3 ${}^6T_{1u}$ |       |                |       |                |  |  |  |  |  |  |  |  |  |
| 14 $\Gamma_{7u}$                            | 2.557 | 321 | 49434 | 39.67 | 4 ${}^6T_{1u}$ | 28.60 | 2 ${}^6A_{1u}$ | 19.93 | 5 ${}^6T_{2u}$ |       |                |  |  |  |  |  |  |  |  |  |
| 29 $\Gamma_{8u}$                            | 2.557 | 321 | 49832 | 23.82 | 4 ${}^6T_{1u}$ | 23.57 | 2 ${}^6A_{1u}$ | 18.43 | 5 ${}^6T_{2u}$ | 14.28 | 3 ${}^6E_u$    |  |  |  |  |  |  |  |  |  |
| 16 $\Gamma_{6u}$                            | 2.554 | 323 | 50292 | 66.06 | 4 ${}^6T_{2u}$ | 15.36 | 3 ${}^6E_u$    |       |                |       |                |  |  |  |  |  |  |  |  |  |
| 30 $\Gamma_{8u}$                            | 2.555 | 323 | 50352 | 55.24 | 4 ${}^6T_{2u}$ | 15.54 | 3 ${}^6E_u$    | 14.71 | 3 ${}^6T_{1u}$ |       |                |  |  |  |  |  |  |  |  |  |
| 15 $\Gamma_{7u}$                            | 2.555 | 322 | 50401 | 47.32 | 4 ${}^6T_{2u}$ | 21.72 | 3 ${}^6T_{1u}$ | 11.43 | 3 ${}^6E_u$    |       |                |  |  |  |  |  |  |  |  |  |
| 16 $\Gamma_{7u}$                            | 2.555 | 321 | 50510 | 36.87 | 3 ${}^6T_{1u}$ | 31.09 | 3 ${}^6E_u$    | 12.37 | 4 ${}^6T_{1u}$ |       |                |  |  |  |  |  |  |  |  |  |
| 31 $\Gamma_{8u}$                            | 2.555 | 320 | 50544 | 42.05 | 3 ${}^6T_{1u}$ | 19.93 | 3 ${}^6E_u$    | 18.11 | 4 ${}^6T_{1u}$ | 12.17 | 2 ${}^6A_{1u}$ |  |  |  |  |  |  |  |  |  |
| $4f^7({}^6F_{1/2,3/2,5/2,7/2,9/2,11/2})^c$  |       |     |       |       |                |       |                |       |                |       |                |  |  |  |  |  |  |  |  |  |
| 17 $\Gamma_{6u}$                            | 2.555 | 321 | 51069 | 43.54 | 5 ${}^6T_{2u}$ | 23.35 | 4 ${}^6T_{1u}$ | 20.75 | 2 ${}^6A_{2u}$ |       |                |  |  |  |  |  |  |  |  |  |
| 32 $\Gamma_{8u}$                            | 2.555 | 321 | 51942 | 23.87 | 5 ${}^6T_{2u}$ | 18.71 | 2 ${}^6A_{2u}$ | 16.29 | 3 ${}^6T_{1u}$ | 15.12 | 4 ${}^6T_{2u}$ |  |  |  |  |  |  |  |  |  |
|                                             |       |     |       | 11.65 | 4 ${}^6T_{1u}$ |       |                |       |                |       |                |  |  |  |  |  |  |  |  |  |
| 33 $\Gamma_{8u}$                            | 2.554 | 321 | 52392 | 66.04 | 3 ${}^6T_{1u}$ | 13.45 | 4 ${}^6T_{1u}$ |       |                |       |                |  |  |  |  |  |  |  |  |  |
| 17 $\Gamma_{7u}$                            | 2.554 | 321 | 52395 | 41.66 | 5 ${}^6T_{2u}$ | 22.95 | 3 ${}^6T_{1u}$ | 16.40 | 4 ${}^6T_{2u}$ |       |                |  |  |  |  |  |  |  |  |  |

|                                            |               |       |     |       |       |             |       |             |       |             |       |             |
|--------------------------------------------|---------------|-------|-----|-------|-------|-------------|-------|-------------|-------|-------------|-------|-------------|
| 34                                         | $\Gamma_{8u}$ | 2.555 | 322 | 52531 | 21.28 | $4^6T_{2u}$ | 20.73 | $2^6A_{2u}$ | 20.22 | $5^6T_{2u}$ | 10.52 | $3^6E_u$    |
| 18                                         | $\Gamma_{6u}$ | 2.555 | 321 | 52666 | 42.23 | $2^6A_{2u}$ | 29.79 | $5^6T_{2u}$ | 15.76 | $4^6T_{2u}$ |       |             |
| 18                                         | $\Gamma_{7u}$ | 2.556 | 321 | 52792 | 42.71 | $4^6T_{1u}$ | 22.80 | $2^6A_{1u}$ | 13.94 | $3^6T_{1u}$ |       |             |
| 35                                         | $\Gamma_{8u}$ | 2.555 | 320 | 52836 | 57.11 | $5^6T_{2u}$ | 12.22 | $3^6E_u$    | 10.99 | $2^6A_{2u}$ |       |             |
| 36                                         | $\Gamma_{8u}$ | 2.556 | 322 | 52916 | 36.37 | $5^6T_{2u}$ | 32.68 | $4^6T_{1u}$ | 13.76 | $4^6T_{2u}$ |       |             |
| 19                                         | $\Gamma_{6u}$ | 2.555 | 321 | 53001 | 50.89 | $5^6T_{2u}$ | 23.28 | $3^6E_u$    | 16.26 | $4^6T_{2u}$ |       |             |
| 37                                         | $\Gamma_{8u}$ | 2.555 | 321 | 53005 | 34.24 | $4^6T_{1u}$ | 17.99 | $3^6T_{1u}$ | 17.80 | $2^6A_{1u}$ |       |             |
| 20                                         | $\Gamma_{6u}$ | 2.557 | 321 | 53066 | 63.69 | $4^6T_{1u}$ | 10.22 | $5^6T_{2u}$ |       |             |       |             |
| 19                                         | $\Gamma_{7u}$ | 2.557 | 321 | 53079 | 71.99 | $4^6T_{1u}$ |       |             |       |             |       |             |
| 38                                         | $\Gamma_{8u}$ | 2.556 | 321 | 53279 | 53.07 | $5^6T_{2u}$ | 25.73 | $4^6T_{1u}$ |       |             |       |             |
| $4f^7(^6H_{5/2,7/2,9/2,11/2,13/2,15/2})^c$ |               |       |     |       |       |             |       |             |       |             |       |             |
| 20                                         | $\Gamma_{7u}$ | 2.554 | 321 | 56062 | 54.56 | $5^6T_{1u}$ | 28.19 | $4^6E_u$    |       |             |       |             |
| 39                                         | $\Gamma_{8u}$ | 2.555 | 320 | 56168 | 34.33 | $5^6T_{1u}$ | 21.18 | $4^6E_u$    | 19.85 | $6^6T_{2u}$ | 19.24 | $6^6T_{1u}$ |
| 40                                         | $\Gamma_{8u}$ | 2.554 | 320 | 56414 | 76.92 | $5^6T_{1u}$ | 10.90 | $4^6E_u$    |       |             |       |             |
| 41                                         | $\Gamma_{8u}$ | 2.554 | 321 | 56455 | 44.29 | $5^6T_{1u}$ | 23.74 | $4^6E_u$    | 22.56 | $6^6T_{1u}$ |       |             |
| 21                                         | $\Gamma_{6u}$ | 2.554 | 321 | 56473 | 48.86 | $5^6T_{1u}$ | 17.72 | $4^6E_u$    | 16.43 | $6^6T_{2u}$ |       |             |
| 21                                         | $\Gamma_{7u}$ | 2.554 | 321 | 56478 | 40.34 | $5^6T_{1u}$ | 36.74 | $4^6E_u$    | 20.92 | $6^6T_{1u}$ |       |             |
| 42                                         | $\Gamma_{8u}$ | 2.554 | 321 | 56485 | 57.56 | $4^6E_u$    | 27.08 | $5^6T_{1u}$ |       |             |       |             |
| 22                                         | $\Gamma_{7u}$ | 2.555 | 321 | 56565 | 39.95 | $6^6T_{2u}$ | 36.11 | $6^6T_{1u}$ | 14.25 | $4^6E_u$    |       |             |
| 43                                         | $\Gamma_{8u}$ | 2.554 | 320 | 56663 | 68.02 | $5^6T_{1u}$ | 11.72 | $6^6T_{1u}$ |       |             |       |             |
| 22                                         | $\Gamma_{6u}$ | 2.554 | 320 | 56674 | 35.37 | $4^6E_u$    | 33.11 | $5^6T_{1u}$ | 18.52 | $6^6T_{1u}$ |       |             |
| 23                                         | $\Gamma_{6u}$ | 2.555 | 322 | 56707 | 65.93 | $6^6T_{1u}$ | 22.27 | $4^6E_u$    |       |             |       |             |
| 23                                         | $\Gamma_{7u}$ | 2.554 | 321 | 56710 | 84.63 | $5^6T_{1u}$ |       |             |       |             |       |             |
| 44                                         | $\Gamma_{8u}$ | 2.555 | 320 | 56732 | 58.55 | $6^6T_{1u}$ | 16.50 | $6^6T_{2u}$ | 14.40 | $4^6E_u$    |       |             |
| 45                                         | $\Gamma_{8u}$ | 2.555 | 321 | 56788 | 37.85 | $6^6T_{1u}$ | 30.05 | $4^6E_u$    | 12.95 | $6^6T_{2u}$ |       |             |
| 46                                         | $\Gamma_{8u}$ | 2.556 | 321 | 56892 | 48.23 | $6^6T_{1u}$ | 27.45 | $6^6T_{2u}$ |       |             |       |             |
| 24                                         | $\Gamma_{7u}$ | 2.555 | 321 | 56900 | 75.19 | $6^6T_{1u}$ | 12.09 | $4^6E_u$    |       |             |       |             |
| 24                                         | $\Gamma_{6u}$ | 2.555 | 321 | 56909 | 74.14 | $6^6T_{2u}$ | 14.35 | $4^6E_u$    |       |             |       |             |
| 47                                         | $\Gamma_{8u}$ | 2.557 | 321 | 57058 | 76.36 | $6^6T_{2u}$ |       |             |       |             |       |             |
| 48                                         | $\Gamma_{8u}$ | 2.557 | 321 | 57113 | 51.81 | $6^6T_{2u}$ | 33.06 | $6^6T_{1u}$ |       |             |       |             |
| 25                                         | $\Gamma_{6u}$ | 2.557 | 321 | 57120 | 79.65 | $6^6T_{2u}$ |       |             |       |             |       |             |
| 49                                         | $\Gamma_{8u}$ | 2.557 | 321 | 57140 | 57.72 | $6^6T_{2u}$ | 27.98 | $6^6T_{1u}$ |       |             |       |             |
| 25                                         | $\Gamma_{7u}$ | 2.557 | 321 | 57164 | 45.93 | $6^6T_{1u}$ | 42.91 | $6^6T_{2u}$ |       |             |       |             |

 $\text{Eu}^{3+}$ -doped  $\text{BaF}_2$ 

|                   |          |       |     |       |       |             |       |             |       |             |  |  |
|-------------------|----------|-------|-----|-------|-------|-------------|-------|-------------|-------|-------------|--|--|
| $4f^6(^7F_{0-6})$ |          |       |     |       |       |             |       |             |       |             |  |  |
| 1                 | $A_{1g}$ | 2.363 | 402 | 0     | 37.34 | $1^7T_{2g}$ | 32.60 | $1^7T_{1g}$ | 24.29 | $1^7A_{2g}$ |  |  |
| 1                 | $T_{1g}$ | 2.363 | 402 | 363   | 37.36 | $1^7T_{2g}$ | 29.96 | $1^7T_{1g}$ | 27.80 | $1^7A_{2g}$ |  |  |
| 1                 | $T_{2g}$ | 2.362 | 403 | 902   | 46.42 | $1^7A_{2g}$ | 37.51 | $1^7T_{2g}$ | 12.52 | $1^7T_{1g}$ |  |  |
| 1                 | $E_g$    | 2.364 | 401 | 1297  | 62.81 | $1^7T_{1g}$ | 33.50 | $1^7T_{2g}$ |       |             |  |  |
| 2                 | $T_{1g}$ | 2.363 | 402 | 1980  | 39.42 | $1^7T_{1g}$ | 30.83 | $1^7T_{2g}$ | 27.17 | $1^7A_{2g}$ |  |  |
| 2                 | $T_{2g}$ | 2.363 | 402 | 2055  | 60.00 | $1^7T_{1g}$ | 25.21 | $1^7T_{2g}$ | 12.20 | $1^7A_{2g}$ |  |  |
| 1                 | $A_{2g}$ | 2.364 | 401 | 2238  | 49.65 | $1^7T_{1g}$ | 47.81 | $1^7T_{2g}$ |       |             |  |  |
| 2                 | $A_{1g}$ | 2.362 | 403 | 2640  | 56.46 | $1^7A_{2g}$ | 41.43 | $1^7T_{1g}$ |       |             |  |  |
| 3                 | $T_{1g}$ | 2.363 | 403 | 3069  | 45.70 | $1^7T_{2g}$ | 33.81 | $1^7T_{1g}$ | 18.40 | $1^7A_{2g}$ |  |  |
| 3                 | $T_{2g}$ | 2.364 | 400 | 3277  | 77.98 | $1^7T_{1g}$ | 17.42 | $1^7T_{2g}$ |       |             |  |  |
| 2                 | $E_g$    | 2.364 | 402 | 3341  | 80.00 | $1^7T_{2g}$ | 17.96 | $1^7T_{1g}$ |       |             |  |  |
| 4                 | $T_{2g}$ | 2.363 | 403 | 4124  | 36.64 | $1^7T_{1g}$ | 35.17 | $1^7T_{2g}$ | 25.84 | $1^7A_{2g}$ |  |  |
| 4                 | $T_{1g}$ | 2.363 | 403 | 4320  | 72.00 | $1^7T_{2g}$ | 14.27 | $1^7T_{1g}$ | 11.38 | $1^7A_{2g}$ |  |  |
| 3                 | $E_g$    | 2.364 | 401 | 4490  | 49.19 | $1^7T_{2g}$ | 48.48 | $1^7T_{1g}$ |       |             |  |  |
| 5                 | $T_{1g}$ | 2.364 | 401 | 4490  | 52.42 | $1^7T_{2g}$ | 45.18 | $1^7T_{1g}$ |       |             |  |  |
| 3                 | $A_{1g}$ | 2.363 | 403 | 5471  | 58.33 | $1^7T_{2g}$ | 22.06 | $1^7T_{1g}$ | 16.37 | $1^7A_{2g}$ |  |  |
| 6                 | $T_{1g}$ | 2.363 | 403 | 5515  | 53.10 | $1^7T_{2g}$ | 31.32 | $1^7T_{1g}$ | 12.33 | $1^7A_{2g}$ |  |  |
| 5                 | $T_{2g}$ | 2.363 | 402 | 5538  | 46.19 | $1^7T_{1g}$ | 40.41 | $1^7T_{2g}$ | 10.14 | $1^7A_{2g}$ |  |  |
| 4                 | $E_g$    | 2.364 | 401 | 5709  | 64.60 | $1^7T_{1g}$ | 32.07 | $1^7T_{2g}$ |       |             |  |  |
| 6                 | $T_{2g}$ | 2.364 | 401 | 5713  | 58.49 | $1^7T_{1g}$ | 38.16 | $1^7T_{2g}$ |       |             |  |  |
| 2                 | $A_{2g}$ | 2.364 | 401 | 5720  | 49.23 | $1^7T_{2g}$ | 47.42 | $1^7T_{1g}$ |       |             |  |  |
| $4f^6(^5D_{0-3})$ |          |       |     |       |       |             |       |             |       |             |  |  |
| 4                 | $A_{1g}$ | 2.362 | 400 | 20083 | 55.58 | $1^5T_{2g}$ | 38.63 | $1^5E_g$    |       |             |  |  |





|    |          |       |     |       |       |             |       |             |       |                               |
|----|----------|-------|-----|-------|-------|-------------|-------|-------------|-------|-------------------------------|
| 24 | $T_{2g}$ | 2.362 | 401 | 31727 | 35.20 | $2^5T_{1g}$ | 29.29 | $3^5E_g$    | 13.87 | $2^5A_{1g}$                   |
| 16 | $E_g$    | 2.361 | 401 | 31741 | 35.15 | $2^5T_{1g}$ | 21.20 | $3^5E_g$    | 20.54 | $2^5A_{1g}$                   |
| 25 | $T_{2g}$ | 2.363 | 403 | 32097 | 49.91 | $3^5T_{2g}$ | 25.18 | $3^5T_{1g}$ |       |                               |
| 23 | $T_{1g}$ | 2.362 | 402 | 32114 | 49.04 | $3^5T_{1g}$ | 32.20 | $3^5T_{2g}$ |       |                               |
| 11 | $A_{1g}$ | 2.363 | 404 | 32305 | 39.00 | $4^5T_{2g}$ | 37.50 | $4^5E_g$    | 17.62 | $3^5T_{2g}$                   |
| 24 | $T_{1g}$ | 2.363 | 402 | 32334 | 35.21 | $4^5E_g$    | 34.04 | $4^5T_{2g}$ | 19.27 | $3^5T_{1g}$                   |
| 17 | $E_g$    | 2.363 | 401 | 32351 | 33.10 | $4^5T_{2g}$ | 32.75 | $4^5E_g$    | 24.44 | $3^5T_{1g}$                   |
| 26 | $T_{2g}$ | 2.363 | 402 | 32374 | 55.09 | $4^5T_{2g}$ | 19.70 | $4^5E_g$    | 13.89 | $3^5T_{2g}$ 10.05 $3^5T_{1g}$ |

<sup>a</sup> Absorption oscillator strengths for  $1\Gamma_{6u,8u,7u} \rightarrow i$  transitions are calculated at  $d_{\text{Eu-F}} = 2.550 \text{ \AA}$ ; the reference value is  $f_{ref} = 1.688 \times 10^{-2}$ . Emission oscillator strengths for  $1\Gamma_{8g} \rightarrow 1\Gamma_{6u,1}\Gamma_{8u,1}\Gamma_{7u}$  and radiative emission lifetime are calculated at  $d_{\text{Eu-F}} = 2.550 \text{ \AA}$ ; the reference value is  $f_{ref} = 2.227 \times 10^{-3}$ .

<sup>b</sup> The analyses of the wave functions have been done at  $d_{\text{Eu-F}} = 2.550 \text{ \AA}$  ( $4f^7$ ),  $2.550 \text{ \AA}$  ( $4f^6(5d^1 + ITE_{a_{1g}}^1)$ ),  $2.350 \text{ \AA}$  ( $4f^6$ ).

<sup>c</sup> C.f. Table S7.

<sup>d</sup> C.f. Table S8.

<sup>e</sup> Low-spin ( $S = 5/2$ ) wave functions of the  $4f^6(^7F_J)(5dt_{2g}^1 + ITE_{a_{1g}}^1)$  configurations have not been included in the spin-orbit calculations.

TABLE S12: Spectroscopic constants and analyses of the spin-orbit wave functions of the ground and lowest lying excited states of  $\text{Eu}^{2+}$  and  $\text{Eu}^{3+}$  -doped CaS octahedral defects. Eu-S bond distances ( $d_{\text{Eu-S},e}$  in Å),  $\text{EuS}_6$  breathing mode harmonic vibrational frequencies ( $\omega_{a_{1g}}$  in  $\text{cm}^{-1}$ ), minimum-to-minimum energy differences ( $T_e$  in  $\text{cm}^{-1}$ ), and relative absorption and emission oscillator strengths ( $f_i^{abs}/f_{ref}$  and  $f_i^{emi}/f_{ref}$ ) are given. Calculated radiative emission lifetime for the  $4f^6(^7F_J)5de_g^1 - 1 \Gamma_{8g}$  excited state is  $0.437 \mu\text{s}$ . Local distortion around the  $\text{Eu}^{2+}$  impurity, relative to experimental crystal structure  $d_{\text{Ca-F}} = 2.855 \text{ \AA}$ , is  $d_{\text{Eu-S},e}(1\Gamma_{6u}) - d_{\text{Ca-S}} = +0.021$ ; ionic radii mismatch is  $+0.13 \text{ \AA}^{31}$ . See Fig. 3, S3 and text for details.

| State                                                 | $d_{\text{Eu-S},e}$ | $\omega_{a_{1g}}$ | $T_e$ | $f_i^{abs}/f_{ref}$ <sup>a</sup> | $f_i^{emi}/f_{ref}$ <sup>a</sup> | weights of terms larger than 10% <sup>b</sup> |       |              |       |                                 |
|-------------------------------------------------------|---------------------|-------------------|-------|----------------------------------|----------------------------------|-----------------------------------------------|-------|--------------|-------|---------------------------------|
| Eu <sup>2+</sup> -doped CaS                           |                     |                   |       |                                  |                                  |                                               |       |              |       |                                 |
| $4f^7(^8S_{7/2})$ <sup>c</sup>                        |                     |                   |       |                                  |                                  |                                               |       |              |       |                                 |
| 1 $\Gamma_{6u}$                                       | 2.876               | 286               | 0     | 1.00                             | 97.68                            | 1 $^8A_{1g}$                                  |       |              |       |                                 |
| 1 $\Gamma_{8u}$                                       | 2.876               | 286               | 0     | 0.34                             | 97.69                            | 1 $^8A_{1g}$                                  |       |              |       |                                 |
| 1 $\Gamma_{7u}$                                       | 2.876               | 286               | 0     | 0.06                             | 97.68                            | 1 $^8A_{1g}$                                  |       |              |       |                                 |
| $4f^6(5d + 6s)^1$ excited states                      |                     |                   |       |                                  |                                  |                                               |       |              |       |                                 |
| $4f^6(^7F_J)5dt_{2g}$ High-Spin coupling <sup>d</sup> |                     |                   |       |                                  |                                  |                                               |       |              |       |                                 |
| 1 $\Gamma_{8g}$                                       | 2.849               | 283               | 17309 | 1.00                             | 34.99                            | 1 $^8T_{1g}$                                  | 30.29 | 1 $^8E_g$    | 16.99 | 1 $^8T_{2g}$                    |
| 2 $\Gamma_{8g}$                                       | 2.849               | 284               | 17710 | 1.11                             | 29.71                            | 1 $^8T_{2g}$                                  | 27.02 | 1 $^8E_g$    | 26.24 | 1 $^8T_{1g}$ 10.94 2 $^8T_{1g}$ |
| 1 $\Gamma_{7g}$                                       | 2.849               | 283               | 18010 | 1.74                             | 46.09                            | 1 $^8T_{2g}$                                  | 26.16 | 2 $^8T_{1g}$ | 13.32 | 1 $^8E_g$                       |
| 3 $\Gamma_{8g}$                                       | 2.849               | 284               | 18252 | 1.30                             | 40.05                            | 1 $^8T_{2g}$                                  | 30.26 | 1 $^8E_g$    | 12.91 | 1 $^8T_{1g}$                    |
| 1 $\Gamma_{6g}$                                       | 2.849               | 284               | 18269 | 0.72                             | 41.49                            | 1 $^8E_g$                                     | 36.98 | 1 $^8T_{1g}$ |       |                                 |
| 2 $\Gamma_{7g}$                                       | 2.849               | 283               | 18582 | 1.99                             | 39.05                            | 1 $^8T_{2g}$                                  | 26.84 | 2 $^8T_{1g}$ | 18.65 | 1 $^8E_g$                       |
| 4 $\Gamma_{8g}$                                       | 2.849               | 283               | 19003 | 2.18                             | 34.97                            | 1 $^8T_{2g}$                                  | 20.15 | 1 $^8T_{1g}$ | 18.45 | 1 $^8E_g$ 17.33 2 $^8T_{1g}$    |
| 2 $\Gamma_{6g}$                                       | 2.849               | 283               | 19090 | 0.28                             | 46.65                            | 1 $^8T_{1g}$                                  | 15.62 | 2 $^8T_{1g}$ | 15.24 | 1 $^8E_g$ 12.02 1 $^8T_{2g}$    |
| 5 $\Gamma_{8g}$                                       | 2.848               | 282               | 19404 | 6.10                             | 35.53                            | 2 $^8T_{1g}$                                  | 29.36 | 1 $^8T_{1g}$ | 24.36 | 1 $^8T_{2g}$                    |
| 6 $\Gamma_{8g}$                                       | 2.849               | 283               | 19799 | 2.47                             | 33.03                            | 1 $^8T_{1g}$                                  | 19.87 | 1 $^8E_g$    | 14.89 | 2 $^8T_{1g}$ 12.09 1 $^8T_{2g}$ |
| 3 $\Gamma_{7g}$                                       | 2.848               | 283               | 19805 | 1.79                             | 31.79                            | 2 $^8T_{1g}$                                  | 16.56 | 2 $^8T_{2g}$ | 13.38 | 2 $^8E_g$                       |
| 7 $\Gamma_{8g}$                                       | 2.848               | 283               | 19883 | 1.73                             | 33.48                            | 1 $^8T_{2g}$                                  | 16.40 | 2 $^8E_g$    | 10.60 | 2 $^8T_{1g}$                    |
| 3 $\Gamma_{6g}$                                       | 2.847               | 284               | 19938 | 0.16                             | 34.28                            | 2 $^8E_g$                                     | 21.03 | 3 $^8T_{1g}$ | 14.77 | 2 $^8T_{2g}$ 11.90 1 $^8T_{2g}$ |
| 8 $\Gamma_{8g}$                                       | 2.848               | 282               | 20109 | 2.68                             | 19.25                            | 1 $^8T_{1g}$                                  | 14.53 | 1 $^8T_{2g}$ | 12.83 | 2 $^8T_{1g}$ 12.46 2 $^8E_g$    |
|                                                       |                     |                   |       |                                  | 10.26                            | 3 $^8T_{1g}$                                  |       |              |       |                                 |
| 4 $\Gamma_{7g}$                                       | 2.848               | 284               | 20143 | 2.14                             | 28.04                            | 1 $^8E_g$                                     | 17.33 | 2 $^8E_g$    | 14.54 | 2 $^8T_{1g}$ 10.43 3 $^8T_{1g}$ |
| 4 $\Gamma_{6g}$                                       | 2.848               | 282               | 20269 | 1.66                             | 37.87                            | 2 $^8T_{1g}$                                  | 31.36 | 1 $^8T_{2g}$ | 17.16 | 1 $^8T_{1g}$                    |
| 9 $\Gamma_{8g}$                                       | 2.848               | 282               | 20487 | 1.63                             | 21.21                            | 2 $^8E_g$                                     | 19.16 | 1 $^8E_g$    | 14.94 | 1 $^8T_{2g}$ 14.71 2 $^8T_{1g}$ |
|                                                       |                     |                   |       |                                  | 13.61                            | 1 $^8T_{1g}$                                  |       |              |       |                                 |
| 5 $\Gamma_{7g}$                                       | 2.848               | 282               | 20685 | 1.28                             | 45.46                            | 1 $^8T_{1g}$                                  | 27.90 | 1 $^8T_{2g}$ |       |                                 |
| 5 $\Gamma_{6g}$                                       | 2.848               | 283               | 20713 | 1.01                             | 26.70                            | 1 $^8T_{2g}$                                  | 19.98 | 2 $^8T_{2g}$ | 15.38 | 2 $^8T_{1g}$                    |
| 10 $\Gamma_{8g}$                                      | 2.848               | 283               | 20768 | 0.07                             | 37.44                            | 2 $^8E_g$                                     | 21.83 | 2 $^8T_{2g}$ | 10.04 | 3 $^8T_{1g}$                    |
| 11 $\Gamma_{8g}$                                      | 2.848               | 282               | 20993 | 2.47                             | 21.58                            | 2 $^8E_g$                                     | 19.02 | 2 $^8T_{1g}$ | 18.78 | 1 $^8T_{1g}$ 15.35 1 $^8E_g$    |
|                                                       |                     |                   |       |                                  | 10.98                            | 3 $^8T_{1g}$                                  |       |              |       |                                 |
| 6 $\Gamma_{7g}$                                       | 2.848               | 283               | 21014 | 2.56                             | 40.97                            | 1 $^8T_{1g}$                                  | 21.79 | 2 $^8T_{1g}$ | 16.30 | 1 $^8T_{2g}$ 14.62 1 $^8E_g$    |
| 12 $\Gamma_{8g}$                                      | 2.848               | 285               | 21024 | 3.34                             | 21.65                            | 1 $^8T_{2g}$                                  | 20.86 | 1 $^8E_g$    | 19.74 | 2 $^8T_{1g}$ 18.94 2 $^8E_g$    |
| 7 $\Gamma_{7g}$                                       | 2.848               | 283               | 21231 | 0.53                             | 24.51                            | 1 $^8T_{2g}$                                  | 18.99 | 3 $^8T_{1g}$ | 10.46 | 2 $^8T_{1g}$                    |
| 6 $\Gamma_{6g}$                                       | 2.848               | 282               | 21238 | 1.34                             | 30.34                            | 1 $^8T_{1g}$                                  | 17.93 | 1 $^8T_{2g}$ | 13.64 | 2 $^8T_{1g}$ 11.17 2 $^8T_{2g}$ |
| 7 $\Gamma_{6g}$                                       | 2.848               | 282               | 21610 | 5.12                             | 32.89                            | 1 $^8T_{1g}$                                  | 25.07 | 2 $^8T_{1g}$ | 17.06 | 1 $^8T_{2g}$ 15.40 1 $^8E_g$    |
| 13 $\Gamma_{8g}$                                      | 2.848               | 282               | 21646 | 5.04                             | 23.39                            | 1 $^8T_{1g}$                                  | 15.34 | 2 $^8T_{1g}$ | 12.41 | 2 $^8E_g$ 12.30 1 $^8T_{2g}$    |
|                                                       |                     |                   |       |                                  | 11.97                            | 1 $^8E_g$                                     |       |              |       |                                 |
| 14 $\Gamma_{8g}$                                      | 2.848               | 282               | 21696 | 1.65                             | 23.77                            | 1 $^8T_{2g}$                                  | 21.52 | 2 $^8E_g$    | 17.47 | 1 $^8E_g$ 11.56 2 $^8T_{2g}$    |
| 15 $\Gamma_{8g}$                                      | 2.848               | 283               | 21781 | 1.54                             | 28.30                            | 1 $^8T_{2g}$                                  | 17.17 | 1 $^8T_{1g}$ | 11.63 | 2 $^8E_g$ 11.12 2 $^8T_{1g}$    |
| 8 $\Gamma_{7g}$                                       | 2.847               | 284               | 21799 | 0.29                             | 27.01                            | 2 $^8E_g$                                     | 10.73 | 3 $^8T_{1g}$ |       |                                 |
| 16 $\Gamma_{8g}$                                      | 2.848               | 283               | 21823 | 2.08                             | 19.60                            | 1 $^8T_{2g}$                                  | 12.42 | 1 $^8T_{1g}$ | 11.19 | 2 $^8E_g$ 11.07 1 $^8E_g$       |
|                                                       |                     |                   |       |                                  | 10.65                            | 2 $^8T_{1g}$                                  |       |              |       |                                 |
| 9 $\Gamma_{7g}$                                       | 2.849               | 283               | 22246 | 2.25                             | 36.41                            | 2 $^8T_{1g}$                                  | 15.66 | 3 $^8T_{1g}$ | 11.64 | 1 $^8T_{2g}$ 10.53 1 $^8T_{1g}$ |
| 17 $\Gamma_{8g}$                                      | 2.848               | 283               | 22256 | 3.99                             | 29.88                            | 2 $^8T_{1g}$                                  | 15.21 | 2 $^8T_{2g}$ | 14.16 | 3 $^8T_{1g}$ 11.07 1 $^8T_{1g}$ |
| 8 $\Gamma_{6g}$                                       | 2.848               | 283               | 22358 | 0.45                             | 34.30                            | 2 $^8T_{2g}$                                  | 10.51 | 3 $^8T_{1g}$ |       |                                 |
| 9 $\Gamma_{6g}$                                       | 2.848               | 283               | 22399 | 0.02                             | 40.80                            | 1 $^8T_{2g}$                                  | 27.20 | 2 $^8E_g$    |       |                                 |

|                                                        |       |     |       |      |       |             |       |             |       |             |       |             |
|--------------------------------------------------------|-------|-----|-------|------|-------|-------------|-------|-------------|-------|-------------|-------|-------------|
| 18 $\Gamma_{8g}$                                       | 2.848 | 282 | 22449 | 6.99 | 34.93 | $2^8T_{1g}$ | 21.38 | $2^8T_{2g}$ | 18.50 | $1^8T_{1g}$ | 10.13 | $3^8T_{1g}$ |
| 19 $\Gamma_{8g}$                                       | 2.848 | 282 | 22564 | 0.09 | 23.06 | $1^8T_{1g}$ | 23.04 | $1^8T_{2g}$ | 16.27 | $2^8E_g$    | 11.16 | $1^8E_g$    |
| 10 $\Gamma_{7g}$                                       | 2.848 | 283 | 22700 | 0.02 | 33.12 | $1^8T_{1g}$ | 18.49 | $1^8T_{2g}$ | 14.29 | $2^8T_{1g}$ | 10.95 | $1^8E_g$    |
| 20 $\Gamma_{8g}$                                       | 2.848 | 283 | 22860 | 9.55 | 39.66 | $2^8T_{1g}$ | 20.47 | $1^8T_{1g}$ | 11.33 | $1^8E_g$    |       |             |
| 10 $\Gamma_{6g}$                                       | 2.848 | 283 | 22881 | 4.21 | 49.68 | $2^8T_{1g}$ | 16.60 | $1^8T_{2g}$ |       |             |       |             |
| 21 $\Gamma_{8g}$                                       | 2.848 | 283 | 23096 | 8.96 | 41.57 | $2^8T_{1g}$ | 22.74 | $2^8T_{2g}$ | 16.90 | $1^8T_{2g}$ |       |             |
| 11 $\Gamma_{6g}$                                       | 2.848 | 283 | 23256 | 0.83 | 38.11 | $2^8T_{2g}$ | 13.86 | $2^8E_g$    | 12.64 | $2^8T_{1g}$ | 10.59 | $1^8T_{2g}$ |
| 22 $\Gamma_{8g}$                                       | 2.848 | 283 | 23354 | 2.35 | 42.88 | $2^8T_{2g}$ | 16.82 | $3^8T_{1g}$ |       |             |       |             |
| 23 $\Gamma_{8g}$                                       | 2.848 | 282 | 23438 | 0.74 | 53.39 | $2^8T_{2g}$ | 15.30 | $3^8T_{1g}$ | 11.97 | $1^8T_{1g}$ |       |             |
| 11 $\Gamma_{7g}$                                       | 2.848 | 282 | 23444 | 0.10 | 58.05 | $2^8T_{2g}$ | 10.04 | $1^8T_{1g}$ |       |             |       |             |
| 12 $\Gamma_{6g}$                                       | 2.848 | 283 | 23516 | 1.91 | 37.50 | $3^8T_{1g}$ | 25.41 | $2^8T_{2g}$ |       |             |       |             |
| 24 $\Gamma_{8g}$                                       | 2.848 | 283 | 23763 | 0.75 | 59.75 | $3^8T_{1g}$ | 19.70 | $2^8T_{2g}$ |       |             |       |             |
| 12 $\Gamma_{7g}$                                       | 2.848 | 283 | 23766 | 0.49 | 62.66 | $3^8T_{1g}$ |       |             |       |             |       |             |
| 25 $\Gamma_{8g}$                                       | 2.848 | 282 | 24028 | 0.21 | 37.07 | $2^8T_{2g}$ | 16.76 | $2^8E_g$    |       |             |       |             |
| 13 $\Gamma_{7g}$                                       | 2.847 | 283 | 24153 | 0.01 | 54.92 | $2^8T_{2g}$ | 10.45 | $2^8E_g$    |       |             |       |             |
| 26 $\Gamma_{8g}$                                       | 2.849 | 284 | 24185 | 0.01 | 68.88 | $1^6T_{1g}$ | 21.51 | $2^8T_{2g}$ |       |             |       |             |
| 13 $\Gamma_{6g}$                                       | 2.847 | 283 | 24624 | 0.34 | 48.23 | $3^8T_{1g}$ | 34.85 | $2^8T_{2g}$ |       |             |       |             |
| 28 $\Gamma_{8g}$                                       | 2.847 | 283 | 24685 | 1.05 | 61.49 | $3^8T_{1g}$ | 15.90 | $2^8T_{2g}$ | 14.54 | $2^8E_g$    |       |             |
| 14 $\Gamma_{7g}$                                       | 2.847 | 283 | 24946 | 0.31 | 49.03 | $3^8T_{1g}$ | 13.04 | $2^8T_{2g}$ |       |             |       |             |
| 29 $\Gamma_{8g}$                                       | 2.847 | 283 | 24982 | 0.68 | 52.97 | $3^8T_{1g}$ |       |             |       |             |       |             |
| 14 $\Gamma_{6g}$                                       | 2.847 | 283 | 24994 | 0.38 | 53.88 | $3^8T_{1g}$ |       |             |       |             |       |             |
| $4f^6(^7F_J)5dt_{2g}^1$ Low-Spin coupling <sup>d</sup> |       |     |       |      |       |             |       |             |       |             |       |             |
| 15 $\Gamma_{7g}$                                       | 2.849 | 283 | 25411 | 0.01 | 78.49 | $1^6T_{1g}$ | 11.03 | $1^6T_{2g}$ |       |             |       |             |
| 30 $\Gamma_{8g}$                                       | 2.849 | 283 | 25414 | 0.01 | 80.32 | $1^6T_{1g}$ |       |             |       |             |       |             |
| 16 $\Gamma_{7g}$                                       | 2.846 | 283 | 26839 | 0.01 | 38.70 | $2^6T_{1g}$ | 35.96 | $1^6E_g$    | 18.90 | $1^6T_{1g}$ |       |             |
| 15 $\Gamma_{6g}$                                       | 2.847 | 282 | 27064 | 0.06 | 49.69 | $1^6T_{1g}$ | 32.01 | $1^6T_{2g}$ | 12.40 | $2^6T_{1g}$ |       |             |
| 31 $\Gamma_{8g}$                                       | 2.847 | 282 | 27089 | 0.10 | 47.68 | $1^6T_{1g}$ | 33.08 | $1^6T_{2g}$ |       |             |       |             |
| 32 $\Gamma_{8g}$                                       | 2.845 | 284 | 27251 | 0.01 | 48.90 | $2^6T_{1g}$ | 28.04 | $1^6E_g$    |       |             |       |             |
| 17 $\Gamma_{7g}$                                       | 2.846 | 283 | 27344 | 0.03 | 30.50 | $1^6T_{2g}$ | 28.89 | $1^6T_{1g}$ | 26.30 | $2^6T_{1g}$ |       |             |
| 16 $\Gamma_{6g}$                                       | 2.845 | 283 | 27462 |      | 24.02 | $2^6T_{1g}$ | 19.35 | $1^6T_{2g}$ | 16.37 | $1^6E_g$    | 15.62 | $2^6T_{2g}$ |
|                                                        |       |     |       |      | 10.98 | $1^6T_{1g}$ |       |             |       |             |       |             |
| 33 $\Gamma_{8g}$                                       | 2.845 | 283 | 27767 | 0.02 | 22.36 | $2^6T_{1g}$ | 21.92 | $2^6T_{2g}$ | 19.63 | $1^6E_g$    | 16.07 | $1^6A_{2g}$ |
| 18 $\Gamma_{7g}$                                       | 2.847 | 284 | 27991 | 0.01 | 45.12 | $1^6T_{1g}$ | 24.45 | $2^6T_{1g}$ | 13.37 | $1^6T_{2g}$ |       |             |
| 17 $\Gamma_{6g}$                                       | 2.845 | 283 | 28081 | 0.02 | 39.33 | $1^6T_{2g}$ | 37.80 | $2^6T_{1g}$ |       |             |       |             |
| 34 $\Gamma_{8g}$                                       | 2.845 | 283 | 28267 | 0.01 | 20.04 | $1^6A_{2g}$ | 18.50 | $2^6T_{2g}$ | 12.78 | $1^6T_{1g}$ | 11.90 | $2^6T_{1g}$ |
|                                                        |       |     |       |      | 11.32 | $1^6E_g$    | 10.12 | $1^6T_{2g}$ |       |             |       |             |
| 18 $\Gamma_{6g}$                                       | 2.844 | 283 | 28448 | 0.01 | 38.67 | $1^6A_{2g}$ | 25.41 | $2^6T_{2g}$ |       |             |       |             |
| 35 $\Gamma_{8g}$                                       | 2.845 | 283 | 28490 | 0.07 | 35.18 | $2^6T_{1g}$ | 34.47 | $1^6T_{2g}$ | 15.18 | $1^6E_g$    |       |             |
| 36 $\Gamma_{8g}$                                       | 2.845 | 283 | 28670 | 0.05 | 26.77 | $1^6E_g$    | 20.03 | $1^6T_{2g}$ | 18.18 | $2^6T_{1g}$ | 10.59 | $3^6T_{1g}$ |
| 19 $\Gamma_{6g}$                                       | 2.846 | 283 | 29080 | 0.04 | 35.27 | $1^6E_g$    | 28.73 | $1^6T_{2g}$ | 23.06 | $2^6T_{2g}$ |       |             |
| 37 $\Gamma_{8g}$                                       | 2.844 | 283 | 29154 | 0.06 | 21.75 | $3^6T_{1g}$ | 21.44 | $2^6T_{2g}$ | 17.18 | $1^6E_g$    | 15.37 | $2^6E_g$    |
|                                                        |       |     |       |      | 12.51 | $2^6T_{1g}$ |       |             |       |             |       |             |
| 38 $\Gamma_{8g}$                                       | 2.844 | 284 | 29250 | 0.03 | 22.89 | $1^6T_{2g}$ | 17.95 | $2^6T_{2g}$ | 16.67 | $2^6T_{1g}$ | 11.70 | $2^6E_g$    |
|                                                        |       |     |       |      | 11.43 | $3^6T_{1g}$ |       |             |       |             |       |             |
| 19 $\Gamma_{7g}$                                       | 2.845 | 282 | 29513 | 0.02 | 35.54 | $2^6T_{1g}$ | 35.46 | $1^6T_{2g}$ |       |             |       |             |
| 20 $\Gamma_{6g}$                                       | 2.844 | 283 | 29626 | 0.01 | 35.82 | $2^6E_g$    | 22.97 | $1^6E_g$    | 22.86 | $2^6T_{2g}$ |       |             |
| 20 $\Gamma_{7g}$                                       | 2.844 | 285 | 29661 | 0.02 | 34.02 | $3^6T_{1g}$ | 28.56 | $2^6T_{1g}$ | 13.85 | $2^6E_g$    |       |             |
| 2 $\Gamma_{7u}$                                        | 2.870 | 212 | 29871 |      | 89.54 | $1^6T_{1u}$ |       |             |       |             |       |             |
| 2 $\Gamma_{8u}$                                        | 2.870 | 212 | 29883 |      | 89.81 | $1^6T_{1u}$ |       |             |       |             |       |             |
| 39 $\Gamma_{8g}$                                       | 2.844 | 283 | 29916 | 0.02 | 22.86 | $2^6E_g$    | 19.84 | $2^6T_{2g}$ | 15.05 | $1^6A_{2g}$ | 14.14 | $3^6T_{1g}$ |
| 21 $\Gamma_{6g}$                                       | 2.846 | 283 | 30059 | 0.04 | 47.57 | $1^6T_{2g}$ | 15.82 | $3^6T_{1g}$ | 10.45 | $1^6T_{1g}$ |       |             |
| 40 $\Gamma_{8g}$                                       | 2.845 | 283 | 30163 | 0.02 | 28.65 | $2^6T_{1g}$ | 26.68 | $1^6T_{2g}$ | 18.02 | $2^6T_{2g}$ |       |             |
| 3 $\Gamma_{8u}$                                        | 2.870 | 210 | 30250 |      | 94.06 | $1^6T_{1u}$ |       |             |       |             |       |             |
| 41 $\Gamma_{8g}$                                       | 2.844 | 284 | 30325 | 0.05 | 29.81 | $2^6T_{2g}$ | 22.25 | $3^6T_{1g}$ | 15.41 | $1^6T_{2g}$ | 11.90 | $2^6T_{1g}$ |
| 21 $\Gamma_{7g}$                                       | 2.844 | 281 | 30363 | 0.03 | 33.22 | $2^6T_{1g}$ | 26.10 | $3^6T_{1g}$ | 15.74 | $1^6E_g$    | 15.70 | $2^6T_{2g}$ |
| 2 $\Gamma_{6u}$                                        | 2.870 | 215 | 30527 |      | 85.44 | $1^6T_{1u}$ | 11.88 | $3^6T_{2u}$ |       |             |       |             |
| 4 $\Gamma_{8u}$                                        | 2.870 | 216 | 30532 |      | 85.58 | $1^6T_{1u}$ |       |             |       |             |       |             |
| 3 $\Gamma_{7u}$                                        | 2.870 | 217 | 30541 |      | 85.79 | $1^6T_{1u}$ | 10.37 | $2^6E_u$    |       |             |       |             |
| 42 $\Gamma_{8g}$                                       | 2.845 | 284 | 30591 | 0.07 | 29.45 | $1^6T_{2g}$ | 29.24 | $2^6T_{1g}$ | 15.31 | $1^6E_g$    | 10.21 | $3^6T_{1g}$ |
| 22 $\Gamma_{7g}$                                       | 2.844 | 283 | 30612 | 0.02 | 29.10 | $2^6E_g$    | 22.11 | $1^6E_g$    | 17.14 | $3^6T_{1g}$ |       |             |
| 43 $\Gamma_{8g}$                                       | 2.845 | 283 | 30903 | 0.12 | 51.00 | $1^6T_{2g}$ | 16.37 | $1^6E_g$    | 13.43 | $2^6T_{1g}$ |       |             |

|                                                                                      |       |     |       |       |       |             |       |             |       |             |       |             |  |
|--------------------------------------------------------------------------------------|-------|-----|-------|-------|-------|-------------|-------|-------------|-------|-------------|-------|-------------|--|
| 23 $\Gamma_{7g}$                                                                     | 2.844 | 283 | 31141 | 0.01  | 54.68 | $2^6T_{2g}$ | 22.58 | $1^6A_{1g}$ |       |             |       |             |  |
| 44 $\Gamma_{8g}$                                                                     | 2.844 | 283 | 31270 | 0.02  | 21.75 | $2^6T_{2g}$ | 20.26 | $1^6A_{1g}$ | 13.20 | $2^6E_g$    | 12.00 | $3^6T_{1g}$ |  |
|                                                                                      |       |     |       |       | 10.52 | $1^6A_{2g}$ |       |             |       |             |       |             |  |
| 22 $\Gamma_{6g}$                                                                     | 2.843 | 283 | 31297 | 0.01  | 27.92 | $3^6T_{1g}$ | 25.03 | $1^6A_{2g}$ | 21.62 | $2^6T_{2g}$ | 17.80 | $1^6T_{2g}$ |  |
| 45 $\Gamma_{8g}$                                                                     | 2.843 | 283 | 31473 | 0.03  | 27.03 | $2^6T_{2g}$ | 25.47 | $2^6E_g$    | 23.73 | $3^6T_{1g}$ | 12.01 | $1^6T_{2g}$ |  |
| 46 $\Gamma_{8g}$                                                                     | 2.844 | 283 | 31511 | 0.01  | 61.79 | $3^6T_{1g}$ | 14.93 | $2^6T_{1g}$ |       |             |       |             |  |
| 23 $\Gamma_{6g}$                                                                     | 2.844 | 283 | 32559 | 0.01  | 38.53 | $3^6T_{1g}$ | 38.09 | $2^6T_{2g}$ | 13.63 | $1^6A_{2g}$ |       |             |  |
| 47 $\Gamma_{8g}$                                                                     | 2.843 | 283 | 32595 |       | 43.07 | $2^6T_{2g}$ | 26.22 | $2^6E_g$    | 15.95 | $1^6A_{2g}$ |       |             |  |
| 24 $\Gamma_{7g}$                                                                     | 2.843 | 283 | 32728 | 0.01  | 53.20 | $3^6T_{1g}$ | 34.08 | $2^6E_g$    |       |             |       |             |  |
| 48 $\Gamma_{8g}$                                                                     | 2.843 | 283 | 32742 | 0.01  | 35.13 | $3^6T_{1g}$ | 33.48 | $2^6E_g$    | 24.27 | $2^6T_{2g}$ |       |             |  |
| 24 $\Gamma_{6g}$                                                                     | 2.843 | 283 | 32782 |       | 44.48 | $2^6E_g$    | 41.12 | $2^6T_{2g}$ |       |             |       |             |  |
| 25 $\Gamma_{7g}$                                                                     | 2.843 | 283 | 33073 |       | 47.77 | $1^6A_{1g}$ | 41.36 | $3^6T_{1g}$ |       |             |       |             |  |
| 49 $\Gamma_{8g}$                                                                     | 2.843 | 283 | 33090 |       | 45.65 | $1^6A_{1g}$ | 42.60 | $3^6T_{1g}$ |       |             |       |             |  |
| $4f^6(^7F_J)(5de_g^1 + 6sa_{1g}^1)$ High-, Low- and Mixed-Spin coupling <sup>d</sup> |       |     |       |       |       |             |       |             |       |             |       |             |  |
| 50 $\Gamma_{8g}$                                                                     | 2.882 | 275 | 40030 | 7.55  | 62.01 | $3^8T_{2g}$ | 28.58 | $4^8T_{1g}$ |       |             |       |             |  |
| 26 $\Gamma_{7g}$                                                                     | 2.883 | 275 | 40125 | 3.43  | 68.95 | $3^8T_{2g}$ | 26.64 | $4^8T_{1g}$ |       |             |       |             |  |
| 51 $\Gamma_{8g}$                                                                     | 2.883 | 275 | 40271 | 1.08  | 79.75 | $3^8T_{2g}$ |       |             |       |             |       |             |  |
| 27 $\Gamma_{7g}$                                                                     | 2.881 | 275 | 40746 | 6.95  | 50.82 | $4^8T_{1g}$ | 34.94 | $3^8T_{2g}$ |       |             |       |             |  |
| 52 $\Gamma_{8g}$                                                                     | 2.883 | 261 | 41065 | 0.10  | 30.81 | $3^8T_{2g}$ | 22.49 | $4^8T_{1g}$ | 19.35 | $3^6T_{2g}$ |       |             |  |
| 25 $\Gamma_{6g}$                                                                     | 2.882 | 275 | 41125 | 2.72  | 51.91 | $3^8T_{2g}$ | 25.49 | $4^8T_{1g}$ | 11.49 | $5^8T_{1g}$ |       |             |  |
| 53 $\Gamma_{8g}$                                                                     | 2.861 | 326 | 41289 | 9.26  | 38.29 | $3^6T_{2g}$ | 17.31 | $3^8T_{2g}$ | 12.06 | $4^8T_{1g}$ |       |             |  |
| 54 $\Gamma_{8g}$                                                                     | 2.872 | 395 | 41685 | 13.75 | 54.45 | $4^8T_{1g}$ | 30.78 | $3^8T_{2g}$ |       |             |       |             |  |
| 26 $\Gamma_{6g}$                                                                     | 2.875 | 383 | 41732 | 3.67  | 29.48 | $3^8T_{2g}$ | 26.06 | $4^8T_{1g}$ | 20.77 | $3^8E_g$    | 12.59 | $4^8T_{2g}$ |  |
|                                                                                      |       |     |       |       | 10.06 | $5^8T_{1g}$ |       |             |       |             |       |             |  |
| 28 $\Gamma_{7g}$                                                                     | 2.882 | 261 | 41980 | 0.20  | 34.64 | $4^8T_{1g}$ | 26.72 | $3^8T_{2g}$ |       |             |       |             |  |
| 55 $\Gamma_{8g}$                                                                     | 2.881 | 303 | 42104 | 0.05  | 32.29 | $4^8T_{2g}$ | 28.56 | $3^8T_{2g}$ | 20.58 | $3^8E_g$    | 10.83 | $4^8T_{1g}$ |  |
| 29 $\Gamma_{7g}$                                                                     | 2.855 | 360 | 42271 | 5.26  | 20.50 | $5^6T_{1g}$ | 19.00 | $3^6E_g$    | 17.45 | $4^6T_{1g}$ | 13.69 | $3^8T_{2g}$ |  |
| 56 $\Gamma_{8g}$                                                                     | 2.881 | 282 | 42379 | 2.99  | 24.54 | $5^8T_{1g}$ | 21.00 | $4^8T_{2g}$ | 19.50 | $4^8T_{1g}$ | 17.68 | $3^8T_{2g}$ |  |
| 27 $\Gamma_{6g}$                                                                     | 2.880 | 553 | 42402 | 0.05  | 27.84 | $4^8T_{2g}$ | 18.01 | $4^8T_{1g}$ | 16.80 | $5^6T_{1g}$ | 12.14 | $3^6T_{2g}$ |  |
| 57 $\Gamma_{8g}$                                                                     | 2.879 | 368 | 42486 | 0.39  | 16.51 | $3^6T_{2g}$ | 16.49 | $3^6E_g$    | 15.34 | $5^8T_{1g}$ | 14.57 | $3^8E_g$    |  |
|                                                                                      |       |     |       |       | 13.48 | $4^6T_{1g}$ |       |             |       |             |       |             |  |
| 58 $\Gamma_{8g}$                                                                     | 2.861 | 317 | 42642 | 4.62  | 28.98 | $5^8T_{1g}$ | 24.55 | $3^8E_g$    |       |             |       |             |  |
| 28 $\Gamma_{6g}$                                                                     | 2.857 | 343 | 42663 | 3.21  | 22.91 | $5^6T_{1g}$ | 16.04 | $4^8T_{2g}$ | 14.87 | $4^8T_{1g}$ | 14.75 | $3^6T_{2g}$ |  |
| 59 $\Gamma_{8g}$                                                                     | 2.876 | 315 | 43058 | 1.54  | 27.22 | $4^8T_{1g}$ | 16.36 | $4^6T_{2g}$ | 14.27 | $3^6T_{2g}$ | 10.17 | $4^6T_{1g}$ |  |
| 60 $\Gamma_{8g}$                                                                     | 2.870 | 311 | 43061 | 12.56 | 27.64 | $4^8T_{1g}$ | 22.61 | $3^8T_{2g}$ | 13.92 | $5^8T_{1g}$ |       |             |  |
| 30 $\Gamma_{7g}$                                                                     | 2.879 | 565 | 43079 | 0.13  | 28.33 | $4^8T_{1g}$ | 13.40 | $4^6T_{2g}$ | 12.26 | $4^6T_{1g}$ | 11.95 | $5^6T_{1g}$ |  |
| 31 $\Gamma_{7g}$                                                                     | 2.879 | 459 | 43148 | 9.03  | 37.10 | $4^8T_{1g}$ | 23.02 | $3^8T_{2g}$ | 13.10 | $5^8T_{1g}$ |       |             |  |
| 29 $\Gamma_{6g}$                                                                     | 2.877 | 326 | 43163 | 1.21  | 34.54 | $4^8T_{2g}$ | 28.79 | $5^8T_{1g}$ | 19.05 | $3^8T_{2g}$ | 12.01 | $4^8T_{1g}$ |  |
| 61 $\Gamma_{8g}$                                                                     | 2.861 | 334 | 43326 | 2.83  | 29.19 | $4^8T_{2g}$ | 16.93 | $3^8E_g$    | 16.82 | $4^8T_{1g}$ | 15.49 | $5^8T_{1g}$ |  |
|                                                                                      |       |     |       |       | 10.56 | $3^8T_{2g}$ |       |             |       |             |       |             |  |
| 30 $\Gamma_{6g}$                                                                     | 2.881 | 321 | 43389 | 2.37  | 60.48 | $3^8T_{2g}$ | 18.67 | $5^8T_{1g}$ | 13.81 | $4^8T_{1g}$ |       |             |  |
| 32 $\Gamma_{7g}$                                                                     | 2.858 | 356 | 43412 | 0.40  | 24.49 | $4^8T_{2g}$ | 19.86 | $3^8E_g$    | 11.00 | $5^8T_{1g}$ |       |             |  |
| 31 $\Gamma_{6g}$                                                                     | 2.880 | 300 | 43685 | 1.27  | 41.37 | $4^8T_{2g}$ | 29.12 | $3^8E_g$    | 12.32 | $4^8T_{1g}$ | 11.30 | $5^8T_{1g}$ |  |
| 62 $\Gamma_{8g}$                                                                     | 2.877 | 312 | 43693 | 0.93  | 35.79 | $3^8E_g$    | 30.20 | $4^8T_{2g}$ | 18.40 | $5^8T_{1g}$ |       |             |  |
| 63 $\Gamma_{8g}$                                                                     | 2.879 | 539 | 43738 | 9.01  | 43.21 | $4^8T_{1g}$ | 18.05 | $3^8T_{2g}$ | 17.14 | $3^8E_g$    | 11.07 | $4^8T_{2g}$ |  |
| 64 $\Gamma_{8g}$                                                                     | 2.881 | 290 | 44218 | 0.71  | 31.95 | $3^8T_{2g}$ | 28.03 | $3^8E_g$    | 16.87 | $4^8T_{2g}$ | 13.78 | $5^8T_{1g}$ |  |
| 33 $\Gamma_{7g}$                                                                     | 2.881 | 291 | 44343 |       | 48.56 | $5^8T_{1g}$ | 21.29 | $4^8T_{2g}$ |       |             |       |             |  |
| 65 $\Gamma_{8g}$                                                                     | 2.880 | 463 | 44491 | 0.06  | 19.87 | $5^6T_{1g}$ | 17.61 | $4^6T_{1g}$ | 13.00 | $5^8T_{1g}$ | 12.98 | $4^8T_{1g}$ |  |
| 32 $\Gamma_{6g}$                                                                     | 2.865 | 208 | 44557 | 0.11  | 39.90 | $4^6T_{2g}$ | 37.21 | $3^6E_g$    | 12.18 | $5^6T_{1g}$ |       |             |  |
| 34 $\Gamma_{7g}$                                                                     | 2.860 | 328 | 44616 | 0.01  | 26.59 | $4^6T_{1g}$ | 18.69 | $5^6T_{1g}$ | 15.03 | $2^6A_{1g}$ | 13.39 | $4^6T_{2g}$ |  |
| 66 $\Gamma_{8g}$                                                                     | 2.869 | 239 | 44639 | 0.12  | 17.73 | $4^6T_{1g}$ | 13.17 | $5^8T_{1g}$ | 12.50 | $5^6T_{1g}$ | 10.08 | $3^6E_g$    |  |
| 67 $\Gamma_{8g}$                                                                     | 2.857 | 300 | 44765 | 0.60  | 27.49 | $3^6T_{2g}$ | 15.36 | $5^6T_{1g}$ | 14.73 | $4^6T_{2g}$ | 13.77 | $4^6T_{1g}$ |  |
| 34 $\Gamma_{6g}$                                                                     | 2.860 | 350 | 44824 | 8.24  | 67.99 | $4^8T_{1g}$ | 20.60 | $3^8T_{2g}$ |       |             |       |             |  |
| 33 $\Gamma_{6g}$                                                                     | 2.855 | 255 | 44836 | 0.05  | 39.96 | $4^6T_{2g}$ | 28.52 | $3^6T_{2g}$ | 19.52 | $4^6T_{1g}$ |       |             |  |
| 68 $\Gamma_{8g}$                                                                     | 2.859 | 323 | 44870 | 7.38  | 18.47 | $4^6T_{1g}$ | 17.48 | $3^6E_g$    | 14.85 | $5^6T_{1g}$ | 12.77 | $4^8T_{1g}$ |  |
|                                                                                      |       |     |       |       | 10.92 | $4^6T_{2g}$ | 10.87 | $3^6T_{2g}$ |       |             |       |             |  |
| 69 $\Gamma_{8g}$                                                                     | 2.861 | 343 | 44916 | 15.94 | 41.70 | $4^8T_{1g}$ | 19.32 | $5^8T_{1g}$ | 10.71 | $4^8T_{2g}$ |       |             |  |
| 35 $\Gamma_{7g}$                                                                     | 2.876 | 549 | 45013 | 0.01  | 59.37 | $4^8T_{2g}$ | 28.86 | $3^8E_g$    |       |             |       |             |  |
| 70 $\Gamma_{8g}$                                                                     | 2.868 | 317 | 45216 | 3.08  | 52.50 | $4^8T_{2g}$ | 27.29 | $5^8T_{1g}$ | 11.42 | $3^8E_g$    |       |             |  |
| 35 $\Gamma_{6g}$                                                                     | 2.876 | 396 | 45278 | 1.96  | 48.37 | $4^8T_{2g}$ | 41.22 | $5^8T_{1g}$ |       |             |       |             |  |
| 71 $\Gamma_{8g}$                                                                     | 2.880 | 366 | 45727 | 4.89  | 51.00 | $5^8T_{1g}$ | 31.81 | $3^8E_g$    | 12.26 | $4^8T_{1g}$ |       |             |  |

|                   |       |     |       |      |       |               |       |               |       |               |       |               |  |
|-------------------|-------|-----|-------|------|-------|---------------|-------|---------------|-------|---------------|-------|---------------|--|
| 36 $\Gamma_{6g}$  | 2.881 | 291 | 45775 | 0.40 | 61.41 | $5^8 T_{1g}$  | 27.54 | $3^8 E_g$     |       |               |       |               |  |
| 72 $\Gamma_{8g}$  | 2.882 | 263 | 46059 | 0.31 | 63.63 | $5^8 T_{1g}$  | 19.37 | $3^8 E_g$     |       |               |       |               |  |
| 36 $\Gamma_{7g}$  | 2.875 | 417 | 46169 | 0.03 | 76.81 | $5^8 T_{1g}$  | 11.23 | $3^8 E_g$     |       |               |       |               |  |
| 73 $\Gamma_{8g}$  | 2.865 | 304 | 46294 | 1.10 | 27.37 | $4^6 T_{1g}$  | 19.94 | $6^6 T_{1g}$  | 15.18 | $5^6 T_{1g}$  | 12.62 | $4^6 T_{2g}$  |  |
|                   |       |     |       |      | 11.28 | $3^6 E_g$     |       |               |       |               |       |               |  |
| 74 $\Gamma_{8g}$  | 2.880 | 500 | 46610 | 0.02 | 78.24 | $4^8 T_{2g}$  |       |               |       |               |       |               |  |
| 75 $\Gamma_{8g}$  | 2.881 | 271 | 46793 |      | 68.49 | $4^8 T_{2g}$  | 28.55 | $5^8 T_{1g}$  |       |               |       |               |  |
| 37 $\Gamma_{7g}$  | 2.881 | 267 | 46816 |      | 71.98 | $4^8 T_{2g}$  | 26.00 | $5^8 T_{1g}$  |       |               |       |               |  |
| 38 $\Gamma_{7g}$  | 2.855 | 357 | 47084 | 0.01 | 52.75 | $5^6 T_{1g}$  | 33.66 | $4^6 T_{1g}$  |       |               |       |               |  |
| 76 $\Gamma_{8g}$  | 2.855 | 326 | 47110 | 0.28 | 39.01 | $4^6 T_{1g}$  | 24.19 | $5^6 T_{1g}$  | 17.33 | $3^6 T_{2g}$  | 14.36 | $4^6 T_{2g}$  |  |
| 37 $\Gamma_{6g}$  | 2.851 | 292 | 47136 | 0.01 | 44.80 | $4^6 T_{1g}$  | 32.63 | $3^6 T_{2g}$  | 12.36 | $4^6 T_{2g}$  |       |               |  |
| 38 $\Gamma_{6g}$  | 2.851 | 286 | 47338 | 0.02 | 33.37 | $3^6 T_{2g}$  | 27.24 | $4^6 T_{2g}$  | 22.65 | $3^6 E_g$     |       |               |  |
| 77 $\Gamma_{8g}$  | 2.851 | 290 | 47374 | 0.02 | 26.73 | $3^6 T_{2g}$  | 21.81 | $3^6 E_g$     | 20.34 | $5^6 T_{1g}$  | 16.97 | $4^6 T_{2g}$  |  |
| 78 $\Gamma_{8g}$  | 2.850 | 298 | 47470 | 0.12 | 45.97 | $4^6 T_{2g}$  | 17.44 | $5^6 T_{1g}$  | 17.16 | $2^6 A_{1g}$  |       |               |  |
| 39 $\Gamma_{7g}$  | 2.853 | 275 | 47488 | 0.02 | 28.63 | $4^6 T_{2g}$  | 23.74 | $5^6 T_{1g}$  | 18.41 | $2^6 A_{1g}$  | 14.24 | $3^6 T_{2g}$  |  |
| 40 $\Gamma_{7g}$  | 2.876 | 575 | 47845 | 0.01 | 54.52 | $6^6 T_{1g}$  | 14.19 | $4^6 T_{1g}$  | 12.44 | $2^6 A_{1g}$  |       |               |  |
| 79 $\Gamma_{8g}$  | 2.876 | 573 | 47993 | 0.01 | 55.42 | $6^6 T_{1g}$  | 19.22 | $4^6 T_{1g}$  | 10.96 | $2^6 A_{1g}$  |       |               |  |
| 80 $\Gamma_{8g}$  | 2.855 | 292 | 48316 | 0.01 | 65.60 | $6^6 T_{1g}$  | 11.85 | $3^6 E_g$     |       |               |       |               |  |
| 39 $\Gamma_{6g}$  | 2.867 | 214 | 49006 |      | 24.77 | $5^6 T_{2g}$  | 23.04 | $6^6 T_{1g}$  | 10.37 | $4^6 E_g$     |       |               |  |
| 81 $\Gamma_{8g}$  | 2.857 | 245 | 49133 |      | 33.77 | $9^6 T_{1g}$  | 28.01 | $7^6 T_{2g}$  |       |               |       |               |  |
| 40 $\Gamma_{6g}$  | 2.876 | 634 | 49137 |      | 32.86 | $5^6 T_{2g}$  | 15.10 | $4^6 E_g$     | 12.73 | $6^6 T_{1g}$  |       |               |  |
| 82 $\Gamma_{8g}$  | 2.860 | 260 | 49147 |      | 31.78 | $6^6 T_{1g}$  |       |               |       |               |       |               |  |
| 41 $\Gamma_{7g}$  | 2.857 | 246 | 49167 |      | 39.20 | $7^6 T_{2g}$  | 23.33 | $9^6 T_{1g}$  |       |               |       |               |  |
| 42 $\Gamma_{7g}$  | 2.853 | 304 | 49208 |      | 32.89 | $6^6 T_{1g}$  | 17.44 | $4^6 T_{1g}$  | 10.21 | $7^6 T_{1g}$  |       |               |  |
| 83 $\Gamma_{8g}$  | 2.853 | 272 | 49253 |      | 36.05 | $5^6 T_{2g}$  | 17.79 | $4^6 E_g$     |       |               |       |               |  |
| 41 $\Gamma_{6g}$  | 2.855 | 269 | 49260 |      | 24.48 | $2^6 A_{2g}$  | 17.71 | $6^6 T_{2g}$  | 17.08 | $5^6 T_{2g}$  | 10.53 | $8^6 T_{1g}$  |  |
| 84 $\Gamma_{8g}$  | 2.854 | 266 | 49303 |      | 24.56 | $5^6 T_{2g}$  | 23.10 | $2^6 A_{2g}$  | 13.40 | $7^6 T_{1g}$  | 12.58 | $6^6 T_{2g}$  |  |
| 43 $\Gamma_{7g}$  | 2.851 | 277 | 49415 |      | 35.75 | $10^6 T_{1g}$ | 28.90 | $5^6 E_g$     |       |               |       |               |  |
| 44 $\Gamma_{7g}$  | 2.851 | 294 | 49445 |      | 23.84 | $7^6 T_{1g}$  | 16.84 | $3^6 A_{1g}$  | 12.92 | $8^6 T_{1g}$  |       |               |  |
| 85 $\Gamma_{8g}$  | 2.855 | 249 | 49450 |      | 20.36 | $6^6 T_{2g}$  | 14.35 | $7^6 T_{1g}$  | 14.02 | $5^6 T_{2g}$  | 12.52 | $8^6 T_{1g}$  |  |
| 86 $\Gamma_{8g}$  | 2.855 | 264 | 49473 |      | 20.33 | $7^6 T_{1g}$  | 16.35 | $3^6 A_{1g}$  | 12.65 | $2^6 A_{2g}$  |       |               |  |
| 87 $\Gamma_{8g}$  | 2.854 | 255 | 49549 |      | 29.88 | $10^6 T_{1g}$ | 20.74 | $5^6 E_g$     | 11.95 | $4^6 A_{1g}$  |       |               |  |
| 42 $\Gamma_{6g}$  | 2.876 | 582 | 49562 |      | 34.97 | $6^6 T_{2g}$  | 13.67 | $7^6 T_{1g}$  | 12.77 | $7^6 T_{2g}$  |       |               |  |
| 45 $\Gamma_{7g}$  | 2.851 | 281 | 49596 |      | 28.20 | $6^6 T_{2g}$  | 26.70 | $5^6 T_{2g}$  | 12.68 | $4^6 E_g$     |       |               |  |
| 88 $\Gamma_{8g}$  | 2.857 | 247 | 49623 |      | 19.07 | $6^6 T_{2g}$  | 18.58 | $7^6 T_{1g}$  | 11.67 | $5^6 T_{2g}$  |       |               |  |
| 46 $\Gamma_{7g}$  | 2.857 | 294 | 49669 |      | 51.53 | $6^8 T_{1g}$  | 38.22 | $5^8 T_{2g}$  |       |               |       |               |  |
| 89 $\Gamma_{8g}$  | 2.855 | 255 | 49740 |      | 42.38 | $9^6 T_{1g}$  | 13.09 | $7^6 T_{2g}$  |       |               |       |               |  |
| 43 $\Gamma_{6g}$  | 2.855 | 252 | 49786 |      | 43.37 | $7^6 T_{2g}$  |       |               |       |               |       |               |  |
| 90 $\Gamma_{8g}$  | 2.876 | 630 | 49844 |      | 16.36 | $4^6 E_g$     | 14.94 | $5^6 T_{2g}$  |       |               |       |               |  |
| 47 $\Gamma_{7g}$  | 2.857 | 280 | 49861 |      | 24.72 | $7^6 T_{1g}$  | 19.55 | $5^6 T_{2g}$  |       |               |       |               |  |
| 91 $\Gamma_{8g}$  | 2.855 | 260 | 49906 |      | 21.79 | $10^6 T_{2g}$ | 13.45 | $9^6 T_{2g}$  | 10.23 | $6^6 E_g$     | 10.23 | $11^6 T_{1g}$ |  |
| 44 $\Gamma_{6g}$  | 2.856 | 253 | 49948 |      | 18.11 | $7^6 T_{1g}$  | 17.36 | $11^6 T_{1g}$ | 16.04 | $9^6 T_{2g}$  |       |               |  |
| 92 $\Gamma_{8g}$  | 2.857 | 248 | 49973 |      | 54.82 | $6^8 T_{1g}$  | 36.29 | $5^8 T_{2g}$  |       |               |       |               |  |
| 93 $\Gamma_{8g}$  | 2.853 | 271 | 50010 |      | 12.87 | $7^6 T_{1g}$  |       |               |       |               |       |               |  |
| 48 $\Gamma_{7g}$  | 2.852 | 286 | 50013 |      | 18.19 | $11^6 T_{1g}$ | 14.77 | $4^6 A_{1g}$  | 12.64 | $10^6 T_{1g}$ |       |               |  |
| 45 $\Gamma_{6g}$  | 2.857 | 252 | 50029 |      | 15.17 | $7^6 T_{1g}$  | 11.35 | $11^6 T_{1g}$ | 10.77 | $9^6 T_{2g}$  | 10.71 | $6^6 T_{2g}$  |  |
| 94 $\Gamma_{8g}$  | 2.855 | 292 | 50049 |      | 11.95 | $8^6 T_{1g}$  | 10.76 | $7^6 T_{1g}$  |       |               |       |               |  |
| 49 $\Gamma_{7g}$  | 2.857 | 306 | 50075 |      | 19.41 | $3^6 A_{1g}$  | 19.20 | $6^6 T_{2g}$  | 17.88 | $4^6 E_g$     |       |               |  |
| 46 $\Gamma_{6g}$  | 2.855 | 290 | 50081 |      | 23.74 | $6^6 T_{2g}$  | 11.90 | $5^6 T_{2g}$  |       |               |       |               |  |
| 95 $\Gamma_{8g}$  | 2.856 | 291 | 50099 |      | 23.93 | $8^6 T_{1g}$  |       |               |       |               |       |               |  |
| 50 $\Gamma_{7g}$  | 2.858 | 319 | 50158 |      | 29.24 | $8^6 T_{1g}$  | 19.30 | $7^6 T_{1g}$  | 13.36 | $7^6 E_g$     |       |               |  |
| 96 $\Gamma_{8g}$  | 2.858 | 276 | 50225 |      | 13.59 | $10^6 T_{2g}$ | 13.30 | $5^6 E_g$     | 12.36 | $10^6 T_{1g}$ |       |               |  |
| 47 $\Gamma_{6g}$  | 2.858 | 242 | 50295 |      | 23.70 | $10^6 T_{2g}$ | 23.20 | $6^6 E_g$     | 11.38 | $12^6 T_{2g}$ | 10.09 | $9^6 T_{2g}$  |  |
| 97 $\Gamma_{8g}$  | 2.857 | 262 | 50336 |      | 23.19 | $9^6 T_{1g}$  |       |               |       |               |       |               |  |
| 98 $\Gamma_{8g}$  | 2.858 | 259 | 50371 |      | 20.09 | $8^6 T_{1g}$  | 13.98 | $4^6 E_g$     |       |               |       |               |  |
| 48 $\Gamma_{6g}$  | 2.850 | 279 | 50375 |      | 39.22 | $7^6 T_{2g}$  | 11.88 | $10^6 T_{1g}$ | 10.67 | $9^6 T_{1g}$  |       |               |  |
| 99 $\Gamma_{8g}$  | 2.857 | 276 | 50389 |      |       |               |       |               |       |               |       |               |  |
| 100 $\Gamma_{8g}$ | 2.858 | 277 | 50428 |      | 63.12 | $6^8 T_{1g}$  | 30.74 | $5^8 T_{2g}$  |       |               |       |               |  |
| 101 $\Gamma_{8g}$ | 2.857 | 297 | 50433 |      | 26.64 | $3^6 T_{2g}$  |       |               |       |               |       |               |  |
| 51 $\Gamma_{7g}$  | 2.855 | 295 | 50442 |      | 37.61 | $3^6 T_{2g}$  | 15.56 | $5^6 T_{1g}$  |       |               |       |               |  |
| 102 $\Gamma_{8g}$ | 2.857 | 291 | 50479 |      | 13.38 | $5^6 T_{1g}$  |       |               |       |               |       |               |  |
| 49 $\Gamma_{6g}$  | 2.853 | 268 | 50480 |      | 18.60 | $3^6 T_{2g}$  | 11.35 | $4^6 E_g$     | 11.07 | $8^6 T_{2g}$  |       |               |  |

|     |               |       |     |       |       |              |              |             |              |             |              |       |              |  |  |  |  |  |  |
|-----|---------------|-------|-----|-------|-------|--------------|--------------|-------------|--------------|-------------|--------------|-------|--------------|--|--|--|--|--|--|
| 50  | $\Gamma_{6g}$ | 2.853 | 280 | 50515 | 20.30 | $5^6T_{2g}$  | 12.03        | $8^6T_{1g}$ |              |             |              |       |              |  |  |  |  |  |  |
| 52  | $\Gamma_{7g}$ | 2.853 | 297 | 50556 | 23.75 | $8^6T_{1g}$  | 18.75        | $7^6T_{2g}$ | 10.00        | $3^6T_{2g}$ |              |       |              |  |  |  |  |  |  |
| 103 | $\Gamma_{8g}$ | 2.857 | 280 | 50575 | 14.85 | $4^6T_{2g}$  | 10.97        | $5^6T_{1g}$ | 10.23        | $6^6T_{2g}$ |              |       |              |  |  |  |  |  |  |
| 53  | $\Gamma_{7g}$ | 2.853 | 312 | 50632 | 26.88 | $11^6T_{1g}$ | 22.12        | $6^6E_g$    | 12.45        | $9^6T_{2g}$ |              |       |              |  |  |  |  |  |  |
| 104 | $\Gamma_{8g}$ | 2.858 | 273 | 50642 | 10.82 | $5^6T_{2g}$  |              |             |              |             |              |       |              |  |  |  |  |  |  |
| 54  | $\Gamma_{7g}$ | 2.850 | 346 | 50659 | 49.92 | $5^8T_{2g}$  | 24.93        | $6^8T_{1g}$ |              |             |              |       |              |  |  |  |  |  |  |
| 105 | $\Gamma_{8g}$ | 2.857 | 280 | 50674 |       |              |              |             |              |             |              |       |              |  |  |  |  |  |  |
| 51  | $\Gamma_{6g}$ | 2.856 | 242 | 50713 | 0.01  | 24.79        | $10^6T_{1g}$ | 12.37       | $5^6E_g$     | 10.65       | $9^6T_{2g}$  |       |              |  |  |  |  |  |  |
| 106 | $\Gamma_{8g}$ | 2.857 | 274 | 50757 |       | 12.14        | $7^6T_{1g}$  | 10.68       | $11^6T_{2g}$ |             |              |       |              |  |  |  |  |  |  |
| 107 | $\Gamma_{8g}$ | 2.855 | 274 | 50790 |       | 24.43        | $10^6T_{2g}$ | 10.52       | $12^6T_{1g}$ | 10.02       | $9^6T_{2g}$  |       |              |  |  |  |  |  |  |
| 55  | $\Gamma_{7g}$ | 2.853 | 326 | 50825 |       | 26.50        | $12^6T_{1g}$ | 11.78       | $6^6E_g$     |             |              |       |              |  |  |  |  |  |  |
| 108 | $\Gamma_{8g}$ | 2.855 | 269 | 50843 |       | 23.96        | $12^6T_{1g}$ | 11.37       | $12^6T_{2g}$ |             |              |       |              |  |  |  |  |  |  |
| 52  | $\Gamma_{6g}$ | 2.848 | 235 | 50872 |       | 11.44        | $8^6T_{2g}$  |             |              |             |              |       |              |  |  |  |  |  |  |
| 109 | $\Gamma_{8g}$ | 2.855 | 286 | 50879 | 0.03  | 31.64        | $11^6T_{2g}$ | 25.21       | $8^6T_{2g}$  |             |              |       |              |  |  |  |  |  |  |
| 110 | $\Gamma_{8g}$ | 2.854 | 293 | 50887 |       | 11.00        | $12^6T_{2g}$ |             |              |             |              |       |              |  |  |  |  |  |  |
| 56  | $\Gamma_{7g}$ | 2.851 | 323 | 50913 |       | 29.18        | $4^6E_g$     | 22.43       | $8^6T_{1g}$  |             |              |       |              |  |  |  |  |  |  |
| 53  | $\Gamma_{6g}$ | 2.852 | 231 | 50965 |       | 13.10        | $8^6T_{2g}$  | 10.46       | $12^6T_{2g}$ |             |              |       |              |  |  |  |  |  |  |
| 111 | $\Gamma_{8g}$ | 2.855 | 277 | 50966 |       | 13.60        | $8^6T_{1g}$  | 13.30       | $4^6T_{2g}$  | 11.31       | $7^6E_g$     |       |              |  |  |  |  |  |  |
| 57  | $\Gamma_{7g}$ | 2.853 | 325 | 51014 |       |              |              |             |              |             |              |       |              |  |  |  |  |  |  |
| 112 | $\Gamma_{8g}$ | 2.857 | 261 | 51039 |       | 13.87        | $8^6T_{1g}$  |             |              |             |              |       |              |  |  |  |  |  |  |
| 58  | $\Gamma_{7g}$ | 2.850 | 338 | 51079 |       | 37.14        | $9^6T_{1g}$  | 13.31       | $10^6T_{1g}$ |             |              |       |              |  |  |  |  |  |  |
| 54  | $\Gamma_{6g}$ | 2.847 | 247 | 51092 |       | 32.67        | $8^6T_{2g}$  | 18.07       | $11^6T_{2g}$ |             |              |       |              |  |  |  |  |  |  |
| 113 | $\Gamma_{8g}$ | 2.854 | 263 | 51095 |       |              |              |             |              |             |              |       |              |  |  |  |  |  |  |
| 114 | $\Gamma_{8g}$ | 2.855 | 276 | 51098 |       | 21.84        | $8^6T_{2g}$  | 13.40       | $11^6T_{2g}$ |             |              |       |              |  |  |  |  |  |  |
| 115 | $\Gamma_{8g}$ | 2.855 | 265 | 51168 |       | 11.33        | $11^6T_{2g}$ |             |              |             |              |       |              |  |  |  |  |  |  |
| 55  | $\Gamma_{6g}$ | 2.848 | 261 | 51170 |       | 11.16        | $2^6A_{2g}$  | 10.89       | $11^6T_{2g}$ |             |              |       |              |  |  |  |  |  |  |
| 56  | $\Gamma_{6g}$ | 2.849 | 274 | 51208 |       | 12.00        | $13^6T_{1g}$ | 10.63       | $13^6T_{2g}$ | 10.61       | $6^6E_g$     | 10.51 | $8^6E_g$     |  |  |  |  |  |  |
| 116 | $\Gamma_{8g}$ | 2.856 | 273 | 51222 |       | 11.01        | $13^6T_{2g}$ | 10.79       | $10^6T_{1g}$ |             |              |       |              |  |  |  |  |  |  |
| 117 | $\Gamma_{8g}$ | 2.856 | 278 | 51243 |       | 48.63        | $6^8T_{1g}$  | 30.00       | $5^8T_{2g}$  |             |              |       |              |  |  |  |  |  |  |
| 59  | $\Gamma_{7g}$ | 2.850 | 314 | 51273 |       | 42.22        | $5^8T_{2g}$  | 32.14       | $6^8T_{1g}$  |             |              |       |              |  |  |  |  |  |  |
| 60  | $\Gamma_{7g}$ | 2.849 | 322 | 51280 |       | 20.80        | $14^6T_{2g}$ | 14.82       | $14^6T_{1g}$ |             |              |       |              |  |  |  |  |  |  |
| 57  | $\Gamma_{6g}$ | 2.849 | 265 | 51283 |       | 47.28        | $5^8T_{2g}$  | 35.88       | $6^8T_{1g}$  |             |              |       |              |  |  |  |  |  |  |
| 58  | $\Gamma_{6g}$ | 2.852 | 279 | 51308 |       | 15.20        | $11^6T_{2g}$ | 14.23       | $7^6E_g$     |             |              |       |              |  |  |  |  |  |  |
| 61  | $\Gamma_{7g}$ | 2.850 | 324 | 51316 |       | 14.04        | $11^6T_{1g}$ | 13.67       | $6^6T_{1g}$  | 12.35       | $12^6T_{2g}$ |       |              |  |  |  |  |  |  |
| 118 | $\Gamma_{8g}$ | 2.857 | 270 | 51323 |       | 13.80        | $6^6T_{1g}$  | 13.62       | $2^6A_{1g}$  | 12.11       | $4^6T_{1g}$  |       |              |  |  |  |  |  |  |
| 119 | $\Gamma_{8g}$ | 2.857 | 276 | 51340 | 0.04  | 11.76        | $9^6T_{2g}$  |             |              |             |              |       |              |  |  |  |  |  |  |
| 59  | $\Gamma_{6g}$ | 2.854 | 277 | 51416 |       | 20.11        | $9^6T_{2g}$  | 14.75       | $5^6E_g$     | 13.19       | $10^6T_{1g}$ |       |              |  |  |  |  |  |  |
| 120 | $\Gamma_{8g}$ | 2.857 | 260 | 51417 |       |              |              |             |              |             |              |       |              |  |  |  |  |  |  |
| 62  | $\Gamma_{7g}$ | 2.849 | 321 | 51418 |       | 14.27        | $13^6T_{1g}$ | 12.53       | $12^6T_{1g}$ |             |              |       |              |  |  |  |  |  |  |
| 63  | $\Gamma_{7g}$ | 2.849 | 318 | 51467 |       | 15.15        | $6^6T_{1g}$  | 10.09       | $12^6T_{2g}$ |             |              |       |              |  |  |  |  |  |  |
| 121 | $\Gamma_{8g}$ | 2.855 | 270 | 51474 |       |              |              |             |              |             |              |       |              |  |  |  |  |  |  |
| 60  | $\Gamma_{6g}$ | 2.856 | 301 | 51482 |       | 24.64        | $10^6T_{2g}$ |             |              |             |              |       |              |  |  |  |  |  |  |
| 122 | $\Gamma_{8g}$ | 2.853 | 268 | 51518 |       | 13.59        | $5^6T_{2g}$  |             |              |             |              |       |              |  |  |  |  |  |  |
| 123 | $\Gamma_{8g}$ | 2.853 | 276 | 51540 |       |              |              |             |              |             |              |       |              |  |  |  |  |  |  |
| 64  | $\Gamma_{7g}$ | 2.850 | 313 | 51550 | 0.01  | 10.87        | $6^6T_{1g}$  | 10.06       | $14^6T_{2g}$ |             |              |       |              |  |  |  |  |  |  |
| 124 | $\Gamma_{8g}$ | 2.853 | 267 | 51608 |       | 13.71        | $13^6T_{2g}$ | 13.63       | $13^6T_{1g}$ |             |              |       |              |  |  |  |  |  |  |
| 65  | $\Gamma_{7g}$ | 2.850 | 345 | 51612 |       | 21.95        | $12^6T_{1g}$ | 12.07       | $8^6E_g$     | 11.54       | $10^6T_{2g}$ |       |              |  |  |  |  |  |  |
| 125 | $\Gamma_{8g}$ | 2.857 | 275 | 51640 |       | 23.13        | $14^6T_{2g}$ |             |              |             |              |       |              |  |  |  |  |  |  |
| 61  | $\Gamma_{6g}$ | 2.857 | 280 | 51646 |       |              |              |             |              |             |              |       |              |  |  |  |  |  |  |
| 126 | $\Gamma_{8g}$ | 2.857 | 261 | 51738 |       | 12.99        | $7^6T_{2g}$  | 11.20       | $10^6T_{1g}$ |             |              |       |              |  |  |  |  |  |  |
| 127 | $\Gamma_{8g}$ | 2.857 | 272 | 51774 |       |              |              |             |              |             |              |       |              |  |  |  |  |  |  |
| 62  | $\Gamma_{6g}$ | 2.855 | 265 | 51808 |       | 20.49        | $16^6T_{2g}$ | 12.83       | $15^6T_{2g}$ | 11.58       | $9^6E_g$     | 10.43 | $15^6T_{1g}$ |  |  |  |  |  |  |
| 66  | $\Gamma_{7g}$ | 2.850 | 295 | 51821 |       | 16.59        | $16^6T_{1g}$ | 13.07       | $10^6E_g$    |             |              |       |              |  |  |  |  |  |  |
| 128 | $\Gamma_{8g}$ | 2.859 | 264 | 51827 |       | 12.22        | $7^6E_g$     | 10.91       | $8^6T_{2g}$  | 10.05       | $11^6T_{2g}$ |       |              |  |  |  |  |  |  |
| 67  | $\Gamma_{7g}$ | 2.849 | 315 | 51868 |       | 13.08        | $16^6T_{1g}$ | 11.02       | $16^6T_{2g}$ |             |              |       |              |  |  |  |  |  |  |
| 63  | $\Gamma_{6g}$ | 2.853 | 302 | 51868 |       | 16.63        | $13^6T_{1g}$ | 10.59       | $13^6T_{2g}$ |             |              |       |              |  |  |  |  |  |  |
| 68  | $\Gamma_{7g}$ | 2.849 | 329 | 51875 |       | 24.02        | $15^6T_{1g}$ |             |              |             |              |       |              |  |  |  |  |  |  |
| 129 | $\Gamma_{8g}$ | 2.857 | 254 | 51935 |       |              |              |             |              |             |              |       |              |  |  |  |  |  |  |
| 130 | $\Gamma_{8g}$ | 2.857 | 254 | 51971 |       | 12.75        | $12^6T_{2g}$ |             |              |             |              |       |              |  |  |  |  |  |  |
| 64  | $\Gamma_{6g}$ | 2.854 | 278 | 52000 |       |              |              |             |              |             |              |       |              |  |  |  |  |  |  |
| 131 | $\Gamma_{8g}$ | 2.857 | 251 | 52006 |       |              |              |             |              |             |              |       |              |  |  |  |  |  |  |
| 69  | $\Gamma_{7g}$ | 2.849 | 303 | 52019 |       | 18.07        | $9^6T_{1g}$  | 15.81       | $10^6T_{1g}$ |             |              |       |              |  |  |  |  |  |  |

|     |               |       |     |       |      |       |              |       |              |       |              |       |              |  |  |  |  |  |  |
|-----|---------------|-------|-----|-------|------|-------|--------------|-------|--------------|-------|--------------|-------|--------------|--|--|--|--|--|--|
| 132 | $\Gamma_{8g}$ | 2.853 | 266 | 52048 |      | 13.28 | $7^6E_g$     | 11.68 | $16^6T_{2g}$ |       |              |       |              |  |  |  |  |  |  |
| 70  | $\Gamma_{7g}$ | 2.848 | 313 | 52049 |      | 18.78 | $13^6T_{1g}$ | 14.03 | $9^6T_{1g}$  | 11.57 | $11^6T_{1g}$ |       |              |  |  |  |  |  |  |
| 133 | $\Gamma_{8g}$ | 2.853 | 266 | 52066 |      | 10.24 | $7^6T_{2g}$  |       |              |       |              |       |              |  |  |  |  |  |  |
| 65  | $\Gamma_{6g}$ | 2.853 | 265 | 52070 |      | 11.69 | $14^6T_{2g}$ |       |              |       |              |       |              |  |  |  |  |  |  |
| 134 | $\Gamma_{8g}$ | 2.853 | 275 | 52083 |      | 56.41 | $6^8T_{1g}$  | 27.04 | $5^8T_{2g}$  |       |              |       |              |  |  |  |  |  |  |
| 66  | $\Gamma_{6g}$ | 2.851 | 282 | 52089 |      | 17.40 | $16^6T_{2g}$ | 13.79 | $15^6T_{2g}$ | 10.59 | $4^6A_{2g}$  | 10.06 | $9^6E_g$     |  |  |  |  |  |  |
| 135 | $\Gamma_{8g}$ | 2.853 | 282 | 52099 |      |       |              |       |              |       |              |       |              |  |  |  |  |  |  |
| 71  | $\Gamma_{7g}$ | 2.847 | 304 | 52122 |      | 10.69 | $9^6T_{1g}$  |       |              |       |              |       |              |  |  |  |  |  |  |
| 67  | $\Gamma_{6g}$ | 2.853 | 292 | 52122 |      | 17.43 | $12^6T_{2g}$ | 12.26 | $11^6T_{2g}$ |       |              |       |              |  |  |  |  |  |  |
| 136 | $\Gamma_{8g}$ | 2.853 | 274 | 52152 |      | 23.03 | $11^6T_{2g}$ | 11.10 | $15^6T_{1g}$ |       |              |       |              |  |  |  |  |  |  |
| 137 | $\Gamma_{8g}$ | 2.853 | 280 | 52163 |      |       |              |       |              |       |              |       |              |  |  |  |  |  |  |
| 138 | $\Gamma_{8g}$ | 2.853 | 284 | 52182 |      | 10.30 | $8^6T_{2g}$  |       |              |       |              |       |              |  |  |  |  |  |  |
| 72  | $\Gamma_{7g}$ | 2.849 | 313 | 52184 | 0.01 | 38.02 | $11^6T_{2g}$ |       |              |       |              |       |              |  |  |  |  |  |  |
| 139 | $\Gamma_{8g}$ | 2.853 | 271 | 52249 | 0.03 | 11.17 | $10^6T_{1g}$ |       |              |       |              |       |              |  |  |  |  |  |  |
| 68  | $\Gamma_{6g}$ | 2.855 | 271 | 52250 | 0.01 | 21.42 | $11^6T_{2g}$ |       |              |       |              |       |              |  |  |  |  |  |  |
| 140 | $\Gamma_{8g}$ | 2.852 | 270 | 52268 | 0.01 | 10.67 | $12^6T_{1g}$ |       |              |       |              |       |              |  |  |  |  |  |  |
| 69  | $\Gamma_{6g}$ | 2.855 | 268 | 52274 |      | 37.47 | $6^8T_{1g}$  | 16.21 | $5^8T_{2g}$  |       |              |       |              |  |  |  |  |  |  |
| 141 | $\Gamma_{8g}$ | 2.853 | 277 | 52285 | 0.01 | 59.39 | $5^8T_{2g}$  | 18.76 | $6^8T_{1g}$  |       |              |       |              |  |  |  |  |  |  |
| 142 | $\Gamma_{8g}$ | 2.852 | 287 | 52293 |      | 18.92 | $7^6E_g$     | 12.86 | $11^6T_{2g}$ |       |              |       |              |  |  |  |  |  |  |
| 73  | $\Gamma_{7g}$ | 2.848 | 282 | 52320 |      | 23.53 | $13^6T_{1g}$ | 10.14 | $13^6T_{2g}$ |       |              |       |              |  |  |  |  |  |  |
| 143 | $\Gamma_{8g}$ | 2.854 | 286 | 52341 |      | 16.46 | $7^6E_g$     |       |              |       |              |       |              |  |  |  |  |  |  |
| 74  | $\Gamma_{7g}$ | 2.851 | 297 | 52342 |      | 10.45 | $10^6T_{2g}$ |       |              |       |              |       |              |  |  |  |  |  |  |
| 70  | $\Gamma_{6g}$ | 2.851 | 291 | 52355 |      | 24.39 | $7^6E_g$     | 14.65 | $11^6T_{2g}$ |       |              |       |              |  |  |  |  |  |  |
| 144 | $\Gamma_{8g}$ | 2.853 | 284 | 52385 |      | 14.87 | $12^6T_{1g}$ |       |              |       |              |       |              |  |  |  |  |  |  |
| 71  | $\Gamma_{6g}$ | 2.854 | 289 | 52435 |      | 14.05 | $14^6T_{2g}$ |       |              |       |              |       |              |  |  |  |  |  |  |
| 145 | $\Gamma_{8g}$ | 2.855 | 288 | 52441 |      | 18.69 | $14^6T_{1g}$ |       |              |       |              |       |              |  |  |  |  |  |  |
| 146 | $\Gamma_{8g}$ | 2.855 | 296 | 52459 |      | 21.42 | $14^6T_{1g}$ |       |              |       |              |       |              |  |  |  |  |  |  |
| 147 | $\Gamma_{8g}$ | 2.857 | 302 | 52490 |      | 12.09 | $11^6T_{2g}$ |       |              |       |              |       |              |  |  |  |  |  |  |
| 72  | $\Gamma_{6g}$ | 2.857 | 294 | 52530 |      | 20.29 | $15^6T_{2g}$ | 10.07 | $16^6T_{2g}$ |       |              |       |              |  |  |  |  |  |  |
| 148 | $\Gamma_{8g}$ | 2.857 | 280 | 52587 |      | 13.83 | $15^6T_{2g}$ |       |              |       |              |       |              |  |  |  |  |  |  |
| 75  | $\Gamma_{7g}$ | 2.876 | 730 | 52600 |      | 24.02 | $16^6T_{2g}$ | 17.16 | $9^6E_g$     | 10.74 | $15^6T_{1g}$ |       |              |  |  |  |  |  |  |
| 149 | $\Gamma_{8g}$ | 2.857 | 268 | 52684 |      |       |              |       |              |       |              |       |              |  |  |  |  |  |  |
| 73  | $\Gamma_{6g}$ | 2.858 | 257 | 52740 |      | 14.55 | $13^6T_{2g}$ | 10.34 | $14^6T_{2g}$ | 10.19 | $9^6T_{2g}$  |       |              |  |  |  |  |  |  |
| 150 | $\Gamma_{8g}$ | 2.857 | 269 | 52741 |      | 11.90 | $11^6T_{1g}$ | 10.47 | $5^6E_g$     |       |              |       |              |  |  |  |  |  |  |
| 151 | $\Gamma_{8g}$ | 2.858 | 267 | 52785 |      | 12.30 | $13^6T_{1g}$ | 10.48 | $15^6T_{1g}$ |       |              |       |              |  |  |  |  |  |  |
| 76  | $\Gamma_{7g}$ | 2.855 | 239 | 52813 |      | 23.78 | $13^6T_{1g}$ | 11.00 | $9^6T_{1g}$  | 10.53 | $12^6T_{1g}$ |       |              |  |  |  |  |  |  |
| 152 | $\Gamma_{8g}$ | 2.854 | 290 | 52819 |      |       |              |       |              |       |              |       |              |  |  |  |  |  |  |
| 74  | $\Gamma_{6g}$ | 2.853 | 270 | 52826 |      | 22.90 | $14^6T_{2g}$ | 14.97 | $13^6T_{2g}$ | 11.89 | $12^6T_{2g}$ |       |              |  |  |  |  |  |  |
| 77  | $\Gamma_{7g}$ | 2.849 | 280 | 52830 |      | 28.57 | $14^6T_{1g}$ |       |              |       |              |       |              |  |  |  |  |  |  |
| 75  | $\Gamma_{6g}$ | 2.854 | 298 | 52844 |      | 14.46 | $13^6T_{2g}$ | 11.94 | $12^6T_{2g}$ |       |              |       |              |  |  |  |  |  |  |
| 153 | $\Gamma_{8g}$ | 2.855 | 293 | 52859 |      | 10.60 | $13^6T_{2g}$ |       |              |       |              |       |              |  |  |  |  |  |  |
| 154 | $\Gamma_{8g}$ | 2.855 | 278 | 52925 |      | 11.63 | $10^6T_{1g}$ |       |              |       |              |       |              |  |  |  |  |  |  |
| 76  | $\Gamma_{6g}$ | 2.856 | 286 | 52970 |      | 39.62 | $9^6T_{1g}$  | 26.35 | $7^6T_{2g}$  |       |              |       |              |  |  |  |  |  |  |
| 155 | $\Gamma_{8g}$ | 2.856 | 269 | 53010 |      | 12.77 | $9^6T_{1g}$  | 11.27 | $10^6T_{1g}$ |       |              |       |              |  |  |  |  |  |  |
| 78  | $\Gamma_{7g}$ | 2.855 | 248 | 53011 |      | 17.54 | $10^6T_{1g}$ | 12.37 | $5^6E_g$     |       |              |       |              |  |  |  |  |  |  |
| 156 | $\Gamma_{8g}$ | 2.854 | 278 | 53024 | 0.04 | 28.46 | $7^6T_{2g}$  | 19.07 | $9^6T_{1g}$  |       |              |       |              |  |  |  |  |  |  |
| 77  | $\Gamma_{6g}$ | 2.857 | 281 | 53097 |      | 12.93 | $12^6T_{1g}$ | 12.21 | $13^6T_{2g}$ |       |              |       |              |  |  |  |  |  |  |
| 157 | $\Gamma_{8g}$ | 2.854 | 273 | 53098 |      | 13.32 | $11^6T_{1g}$ | 10.16 | $6^6E_g$     |       |              |       |              |  |  |  |  |  |  |
| 79  | $\Gamma_{7g}$ | 2.851 | 265 | 53101 |      | 17.48 | $10^6T_{2g}$ | 12.60 | $12^6T_{1g}$ |       |              |       |              |  |  |  |  |  |  |
| 158 | $\Gamma_{8g}$ | 2.855 | 274 | 53157 |      |       |              |       |              |       |              |       |              |  |  |  |  |  |  |
| 159 | $\Gamma_{8g}$ | 2.854 | 276 | 53177 |      | 12.59 | $9^6T_{2g}$  | 12.00 | $11^6T_{1g}$ | 11.60 | $14^6T_{2g}$ |       |              |  |  |  |  |  |  |
| 80  | $\Gamma_{7g}$ | 2.851 | 270 | 53190 |      | 24.30 | $15^6T_{1g}$ | 13.29 | $16^6T_{2g}$ |       |              |       |              |  |  |  |  |  |  |
| 78  | $\Gamma_{6g}$ | 2.857 | 270 | 53214 | 0.01 | 16.94 | $16^6T_{2g}$ | 10.06 | $4^6A_{2g}$  |       |              |       |              |  |  |  |  |  |  |
| 160 | $\Gamma_{8g}$ | 2.855 | 270 | 53226 | 0.01 | 13.21 | $15^6T_{1g}$ | 12.44 | $17^6T_{2g}$ | 10.82 | $9^6E_g$     |       |              |  |  |  |  |  |  |
| 79  | $\Gamma_{6g}$ | 2.857 | 293 | 53231 |      | 29.10 | $6^8T_{1g}$  | 22.19 | $5^8T_{2g}$  | 14.84 | $12^6T_{1g}$ |       |              |  |  |  |  |  |  |
| 80  | $\Gamma_{6g}$ | 2.857 | 314 | 53240 |      | 22.44 | $6^8T_{1g}$  | 16.23 | $5^8T_{2g}$  | 14.24 | $16^6T_{1g}$ | 12.30 | $12^6T_{1g}$ |  |  |  |  |  |  |
| 161 | $\Gamma_{8g}$ | 2.855 | 276 | 53270 |      | 52.99 | $6^8T_{1g}$  | 41.65 | $5^8T_{2g}$  |       |              |       |              |  |  |  |  |  |  |
| 162 | $\Gamma_{8g}$ | 2.857 | 288 | 53296 |      | 18.49 | $16^6T_{2g}$ | 17.76 | $15^6T_{2g}$ |       |              |       |              |  |  |  |  |  |  |
| 81  | $\Gamma_{7g}$ | 2.853 | 258 | 53312 |      | 17.88 | $5^6A_{1g}$  |       |              |       |              |       |              |  |  |  |  |  |  |
| 82  | $\Gamma_{7g}$ | 2.851 | 287 | 53322 |      | 59.84 | $6^8T_{1g}$  |       |              |       |              |       |              |  |  |  |  |  |  |
| 83  | $\Gamma_{7g}$ | 2.855 | 311 | 53383 |      | 29.42 | $14^6T_{1g}$ |       |              |       |              |       |              |  |  |  |  |  |  |
| 163 | $\Gamma_{8g}$ | 2.858 | 267 | 53407 |      | 20.34 | $17^6T_{2g}$ |       |              |       |              |       |              |  |  |  |  |  |  |

|                   |       |     |       |      |       |               |       |               |       |               |       |               |  |  |  |  |  |  |  |  |
|-------------------|-------|-----|-------|------|-------|---------------|-------|---------------|-------|---------------|-------|---------------|--|--|--|--|--|--|--|--|
| 164 $\Gamma_{8g}$ | 2.857 | 274 | 53449 |      | 69.05 | $5^8 T_{2g}$  | 15.13 | $6^8 T_{1g}$  |       |               |       |               |  |  |  |  |  |  |  |  |
| 165 $\Gamma_{8g}$ | 2.853 | 297 | 53525 |      | 12.60 | $9^6 T_{2g}$  | 11.81 | $11^6 T_{1g}$ |       |               |       |               |  |  |  |  |  |  |  |  |
| 81 $\Gamma_{6g}$  | 2.851 | 292 | 53566 |      | 15.07 | $9^6 T_{2g}$  | 14.88 | $3^6 A_{2g}$  | 13.40 | $13^6 T_{2g}$ | 11.21 | $10^6 T_{2g}$ |  |  |  |  |  |  |  |  |
|                   |       |     |       |      | 10.31 | $12^6 T_{2g}$ |       |               |       |               |       |               |  |  |  |  |  |  |  |  |
| 84 $\Gamma_{7g}$  | 2.857 | 279 | 53569 |      | 27.98 | $16^6 T_{1g}$ | 10.81 | $13^6 T_{2g}$ |       |               |       |               |  |  |  |  |  |  |  |  |
| 166 $\Gamma_{8g}$ | 2.854 | 287 | 53581 |      | 19.82 | $12^6 T_{2g}$ | 14.96 | $10^6 T_{2g}$ | 10.92 | $13^6 T_{2g}$ | 10.39 | $6^6 E_g$     |  |  |  |  |  |  |  |  |
| 167 $\Gamma_{8g}$ | 2.853 | 286 | 53615 |      | 15.15 | $16^6 T_{1g}$ | 10.36 | $13^6 T_{1g}$ |       |               |       |               |  |  |  |  |  |  |  |  |
| 82 $\Gamma_{6g}$  | 2.855 | 313 | 53647 |      | 17.70 | $12^6 T_{2g}$ | 17.56 | $10^6 T_{2g}$ | 16.92 | $13^6 T_{2g}$ | 11.15 | $6^6 E_g$     |  |  |  |  |  |  |  |  |
| 85 $\Gamma_{7g}$  | 2.860 | 303 | 53652 |      | 26.75 | $13^6 T_{1g}$ | 19.13 | $13^6 T_{2g}$ |       |               |       |               |  |  |  |  |  |  |  |  |
| 168 $\Gamma_{8g}$ | 2.853 | 280 | 53715 |      | 22.45 | $13^6 T_{1g}$ | 18.30 | $12^6 T_{2g}$ | 15.84 | $13^6 T_{2g}$ |       |               |  |  |  |  |  |  |  |  |
| 169 $\Gamma_{8g}$ | 2.853 | 294 | 53733 |      | 36.62 | $13^6 T_{1g}$ | 10.03 | $14^6 T_{2g}$ |       |               |       |               |  |  |  |  |  |  |  |  |
| 170 $\Gamma_{8g}$ | 2.855 | 287 | 53800 |      | 31.33 | $13^6 T_{1g}$ |       |               |       |               |       |               |  |  |  |  |  |  |  |  |
| 86 $\Gamma_{7g}$  | 2.860 | 276 | 53848 |      | 20.62 | $13^6 T_{2g}$ | 14.86 | $15^6 T_{2g}$ | 12.21 | $13^6 T_{1g}$ | 12.13 | $16^6 T_{1g}$ |  |  |  |  |  |  |  |  |
| 83 $\Gamma_{6g}$  | 2.857 | 266 | 53888 |      | 23.58 | $16^6 T_{2g}$ | 13.87 | $4^6 A_{2g}$  | 10.58 | $10^6 E_g$    |       |               |  |  |  |  |  |  |  |  |
| 171 $\Gamma_{8g}$ | 2.859 | 295 | 53889 |      | 13.33 | $15^6 T_{2g}$ | 12.14 | $13^6 T_{2g}$ |       |               |       |               |  |  |  |  |  |  |  |  |
| 87 $\Gamma_{7g}$  | 2.876 | 734 | 53906 |      | 34.36 | $12^6 T_{1g}$ | 15.47 | $15^6 T_{1g}$ | 10.87 | $8^6 E_g$     |       |               |  |  |  |  |  |  |  |  |
| 84 $\Gamma_{6g}$  | 2.861 | 305 | 53909 | 0.02 | 18.09 | $16^6 T_{1g}$ | 12.49 | $16^6 T_{2g}$ |       |               |       |               |  |  |  |  |  |  |  |  |
| 86 $\Gamma_{6g}$  | 2.857 | 364 | 53928 |      | 13.16 | $13^6 T_{2g}$ | 11.97 | $16^6 T_{1g}$ |       |               |       |               |  |  |  |  |  |  |  |  |
| 85 $\Gamma_{6g}$  | 2.856 | 338 | 53933 |      | 20.11 | $13^6 T_{2g}$ | 11.44 | $8^6 E_g$     |       |               |       |               |  |  |  |  |  |  |  |  |
| 172 $\Gamma_{8g}$ | 2.858 | 281 | 53959 |      | 13.09 | $12^6 T_{1g}$ | 10.47 | $16^6 T_{2g}$ |       |               |       |               |  |  |  |  |  |  |  |  |
| 88 $\Gamma_{7g}$  | 2.876 | 622 | 54064 | 0.02 | 16.58 | $15^6 T_{2g}$ | 16.17 | $9^6 E_g$     | 12.01 | $12^6 T_{1g}$ | 11.52 | $15^6 T_{1g}$ |  |  |  |  |  |  |  |  |
|                   |       |     |       |      | 10.82 | $10^6 E_g$    |       |               |       |               |       |               |  |  |  |  |  |  |  |  |
| 87 $\Gamma_{6g}$  | 2.857 | 347 | 54090 |      | 25.14 | $16^6 T_{2g}$ | 17.45 | $10^6 E_g$    | 11.87 | $15^6 T_{2g}$ |       |               |  |  |  |  |  |  |  |  |
| 173 $\Gamma_{8g}$ | 2.861 | 268 | 54117 | 0.04 | 23.30 | $15^6 T_{2g}$ | 15.77 | $16^6 T_{2g}$ |       |               |       |               |  |  |  |  |  |  |  |  |
| 174 $\Gamma_{8g}$ | 2.876 | 696 | 54257 |      | 16.64 | $18^6 T_{2g}$ | 13.36 | $11^6 E_g$    | 10.12 | $19^6 T_{2g}$ |       |               |  |  |  |  |  |  |  |  |
| 175 $\Gamma_{8g}$ | 2.876 | 679 | 54312 |      | 15.05 | $11^6 E_g$    | 10.66 | $19^6 T_{2g}$ |       |               |       |               |  |  |  |  |  |  |  |  |
| 89 $\Gamma_{7g}$  | 2.876 | 898 | 54327 |      | 24.43 | $15^6 T_{1g}$ | 18.36 | $5^6 A_{1g}$  | 11.89 | $14^6 T_{2g}$ | 11.04 | $15^6 T_{2g}$ |  |  |  |  |  |  |  |  |
|                   |       |     |       |      | 10.97 | $14^6 T_{1g}$ |       |               |       |               |       |               |  |  |  |  |  |  |  |  |
| 88 $\Gamma_{6g}$  | 2.856 | 317 | 54384 |      | 32.19 | $14^6 T_{1g}$ | 27.90 | $14^6 T_{2g}$ |       |               |       |               |  |  |  |  |  |  |  |  |
| 176 $\Gamma_{8g}$ | 2.876 | 706 | 54397 |      | 19.25 | $15^6 T_{1g}$ | 15.31 | $5^6 A_{1g}$  | 13.07 | $14^6 T_{2g}$ |       |               |  |  |  |  |  |  |  |  |
| 90 $\Gamma_{7g}$  | 2.876 | 744 | 54412 |      | 50.34 | $6^8 T_{1g}$  | 48.04 | $5^8 T_{2g}$  |       |               |       |               |  |  |  |  |  |  |  |  |
| 177 $\Gamma_{8g}$ | 2.876 | 784 | 54465 | 0.01 | 21.78 | $14^6 T_{2g}$ | 16.55 | $18^6 T_{2g}$ |       |               |       |               |  |  |  |  |  |  |  |  |
| 89 $\Gamma_{6g}$  | 2.853 | 318 | 54531 |      | 20.33 | $18^6 T_{1g}$ | 20.31 | $19^6 T_{2g}$ | 15.47 | $17^6 T_{2g}$ | 10.78 | $5^6 A_{2g}$  |  |  |  |  |  |  |  |  |
| 178 $\Gamma_{8g}$ | 2.858 | 240 | 54581 |      | 56.16 | $6^8 T_{1g}$  | 41.05 | $5^8 T_{2g}$  |       |               |       |               |  |  |  |  |  |  |  |  |
| 91 $\Gamma_{7g}$  | 2.876 | 770 | 54629 |      | 31.78 | $5^8 T_{2g}$  | 17.04 | $6^8 T_{1g}$  | 10.44 | $10^6 E_g$    |       |               |  |  |  |  |  |  |  |  |
| 179 $\Gamma_{8g}$ | 2.876 | 598 | 54648 |      | 34.96 | $17^6 T_{2g}$ | 12.30 | $18^6 T_{2g}$ |       |               |       |               |  |  |  |  |  |  |  |  |
| 92 $\Gamma_{7g}$  | 2.867 | 378 | 54664 | 0.01 | 24.33 | $10^6 E_g$    | 22.61 | $16^6 T_{1g}$ | 13.75 | $5^8 T_{2g}$  |       |               |  |  |  |  |  |  |  |  |
| 90 $\Gamma_{6g}$  | 2.852 | 310 | 54674 |      | 27.67 | $17^6 T_{2g}$ | 12.62 | $15^6 T_{2g}$ |       |               |       |               |  |  |  |  |  |  |  |  |
| 91 $\Gamma_{6g}$  | 2.857 | 349 | 54677 |      | 31.48 | $15^6 T_{2g}$ | 15.68 | $4^6 A_{2g}$  | 14.84 | $9^6 E_g$     |       |               |  |  |  |  |  |  |  |  |
| 180 $\Gamma_{8g}$ | 2.861 | 255 | 54679 |      | 28.63 | $15^6 T_{2g}$ | 21.67 | $9^6 E_g$     | 19.12 | $4^6 A_{2g}$  | 14.00 | $16^6 T_{2g}$ |  |  |  |  |  |  |  |  |
| 181 $\Gamma_{8g}$ | 2.860 | 257 | 54700 |      | 20.66 | $16^6 T_{1g}$ | 15.09 | $9^6 E_g$     | 11.39 | $15^6 T_{2g}$ |       |               |  |  |  |  |  |  |  |  |
| 92 $\Gamma_{6g}$  | 2.856 | 432 | 54704 |      | 18.44 | $9^6 E_g$     | 16.16 | $15^6 T_{2g}$ | 13.05 | $15^6 T_{1g}$ | 11.77 | $17^6 T_{2g}$ |  |  |  |  |  |  |  |  |
|                   |       |     |       |      | 11.72 | $16^6 T_{2g}$ |       |               |       |               |       |               |  |  |  |  |  |  |  |  |
| 182 $\Gamma_{8g}$ | 2.864 | 295 | 54756 |      | 49.08 | $5^8 T_{2g}$  | 18.68 | $6^8 T_{1g}$  |       |               |       |               |  |  |  |  |  |  |  |  |
| 93 $\Gamma_{7g}$  | 2.857 | 414 | 54814 | 0.01 | 50.61 | $5^8 T_{2g}$  | 14.25 | $6^8 T_{1g}$  |       |               |       |               |  |  |  |  |  |  |  |  |
| 183 $\Gamma_{8g}$ | 2.864 | 298 | 54822 |      | 25.93 | $16^6 T_{1g}$ | 22.39 | $10^6 E_g$    | 14.37 | $16^6 T_{2g}$ |       |               |  |  |  |  |  |  |  |  |
| 184 $\Gamma_{8g}$ | 2.862 | 273 | 54994 |      | 34.08 | $16^6 T_{2g}$ | 14.34 | $10^6 E_g$    |       |               |       |               |  |  |  |  |  |  |  |  |
| 94 $\Gamma_{7g}$  | 2.851 | 426 | 55071 |      | 21.60 | $11^6 E_g$    | 15.39 | $17^6 T_{1g}$ | 13.49 | $19^6 T_{1g}$ | 12.42 | $18^6 T_{1g}$ |  |  |  |  |  |  |  |  |
| 185 $\Gamma_{8g}$ | 2.876 | 623 | 55096 |      | 21.69 | $18^6 T_{2g}$ | 17.53 | $19^6 T_{2g}$ | 15.68 | $18^6 T_{1g}$ | 11.30 | $5^6 A_{2g}$  |  |  |  |  |  |  |  |  |
| 93 $\Gamma_{6g}$  | 2.850 | 407 | 55110 |      | 28.19 | $18^6 T_{2g}$ | 17.18 | $11^6 E_g$    |       |               |       |               |  |  |  |  |  |  |  |  |
| 186 $\Gamma_{8g}$ | 2.858 | 310 | 55248 |      | 17.58 | $18^6 T_{2g}$ | 16.99 | $17^6 T_{1g}$ | 14.73 | $18^6 T_{1g}$ | 10.85 | $11^6 E_g$    |  |  |  |  |  |  |  |  |
| 187 $\Gamma_{8g}$ | 2.876 | 608 | 55540 | 0.04 | 22.01 | $17^6 T_{1g}$ | 11.12 | $19^6 T_{2g}$ |       |               |       |               |  |  |  |  |  |  |  |  |
| 94 $\Gamma_{6g}$  | 2.854 | 324 | 55608 | 0.01 | 25.79 | $11^6 E_g$    | 21.31 | $18^6 T_{2g}$ |       |               |       |               |  |  |  |  |  |  |  |  |
| 188 $\Gamma_{8g}$ | 2.850 | 276 | 55646 |      | 28.71 | $11^6 E_g$    | 20.51 | $17^6 T_{1g}$ |       |               |       |               |  |  |  |  |  |  |  |  |
| 189 $\Gamma_{8g}$ | 2.851 | 293 | 55652 |      | 26.77 | $17^6 T_{1g}$ | 25.77 | $11^6 E_g$    | 12.76 | $6^6 A_{1g}$  |       |               |  |  |  |  |  |  |  |  |
| 190 $\Gamma_{8g}$ | 2.853 | 292 | 55720 | 0.01 | 19.41 | $11^6 E_g$    | 15.31 | $17^6 T_{2g}$ |       |               |       |               |  |  |  |  |  |  |  |  |
| 95 $\Gamma_{7g}$  | 2.851 | 278 | 55735 |      | 42.31 | $17^6 T_{1g}$ | 17.00 | $17^6 T_{2g}$ |       |               |       |               |  |  |  |  |  |  |  |  |
| 96 $\Gamma_{7g}$  | 2.849 | 275 | 55798 | 0.01 | 31.53 | $18^6 T_{1g}$ | 18.37 | $19^6 T_{2g}$ | 13.29 | $17^6 T_{1g}$ |       |               |  |  |  |  |  |  |  |  |
| 191 $\Gamma_{8g}$ | 2.851 | 271 | 55844 |      | 13.92 | $18^6 T_{2g}$ | 13.60 | $18^6 T_{1g}$ | 11.29 | $19^6 T_{1g}$ |       |               |  |  |  |  |  |  |  |  |
| 192 $\Gamma_{8g}$ | 2.850 | 279 | 55905 |      | 28.37 | $17^6 T_{2g}$ | 11.72 | $18^6 T_{2g}$ |       |               |       |               |  |  |  |  |  |  |  |  |
| 97 $\Gamma_{7g}$  | 2.849 | 270 | 55905 |      | 32.05 | $17^6 T_{1g}$ | 25.04 | $17^6 T_{2g}$ |       |               |       |               |  |  |  |  |  |  |  |  |
| 193 $\Gamma_{8g}$ | 2.850 | 282 | 55963 |      | 44.08 | $17^6 T_{1g}$ |       |               |       |               |       |               |  |  |  |  |  |  |  |  |



|                   |       |     |       |       |                 |       |                 |       |                 |       |                 |  |  |
|-------------------|-------|-----|-------|-------|-----------------|-------|-----------------|-------|-----------------|-------|-----------------|--|--|
| 95 $\Gamma_{6g}$  | 2.855 | 268 | 55981 | 52.05 | 17 ${}^6T_{2g}$ | 14.89 | 13 ${}^6E_g$    |       |                 |       |                 |  |  |
| 194 $\Gamma_{8g}$ | 2.849 | 279 | 56019 | 15.30 | 11 ${}^6E_g$    | 14.25 | 12 ${}^6E_g$    | 14.17 | 17 ${}^6T_{1g}$ | 10.64 | 17 ${}^6T_{2g}$ |  |  |
| 98 $\Gamma_{7g}$  | 2.849 | 275 | 56050 | 22.81 | 19 ${}^6T_{1g}$ | 13.97 | 21 ${}^6T_{2g}$ | 11.05 | 6 ${}^6A_{1g}$  |       |                 |  |  |
| 195 $\Gamma_{8g}$ | 2.848 | 280 | 56063 | 16.57 | 20 ${}^6T_{2g}$ | 10.15 | 19 ${}^6T_{2g}$ | 10.10 | 17 ${}^6T_{1g}$ |       |                 |  |  |
| 99 $\Gamma_{7g}$  | 2.850 | 274 | 56162 | 50.17 | 6 ${}^6A_{1g}$  | 11.11 | 19 ${}^6T_{1g}$ |       |                 |       |                 |  |  |
| 96 $\Gamma_{6g}$  | 2.847 | 284 | 56273 | 20.47 | 5 ${}^6A_{2g}$  | 15.52 | 18 ${}^6T_{2g}$ | 12.08 | 18 ${}^6T_{1g}$ | 10.61 | 20 ${}^6T_{2g}$ |  |  |
| 196 $\Gamma_{8g}$ | 2.849 | 272 | 56301 | 38.85 | 17 ${}^6T_{1g}$ |       |                 |       |                 |       |                 |  |  |
| 197 $\Gamma_{8g}$ | 2.850 | 280 | 56354 | 42.46 | 6 ${}^6A_{1g}$  | 16.73 | 11 ${}^6E_g$    |       |                 |       |                 |  |  |
| 100 $\Gamma_{7g}$ | 2.849 | 274 | 56362 | 19.59 | 18 ${}^6T_{1g}$ | 17.01 | 19 ${}^6T_{1g}$ | 15.29 | 17 ${}^6T_{1g}$ | 10.06 | 6 ${}^6A_{1g}$  |  |  |
| 198 $\Gamma_{8g}$ | 2.850 | 272 | 56420 | 14.42 | 20 ${}^6T_{2g}$ | 12.14 | 19 ${}^6T_{2g}$ | 11.08 | 20 ${}^6T_{1g}$ |       |                 |  |  |
| 97 $\Gamma_{6g}$  | 2.851 | 258 | 56428 | 35.82 | 17 ${}^6T_{1g}$ | 16.21 | 20 ${}^6T_{2g}$ | 10.83 | 18 ${}^6T_{2g}$ |       |                 |  |  |
| 98 $\Gamma_{6g}$  | 2.849 | 295 | 56469 | 48.65 | 18 ${}^6T_{2g}$ | 16.25 | 12 ${}^6E_g$    |       |                 |       |                 |  |  |
| 199 $\Gamma_{8g}$ | 2.849 | 275 | 56486 | 18.88 | 18 ${}^6T_{1g}$ | 11.63 | 20 ${}^6T_{2g}$ | 10.46 | 12 ${}^6E_g$    |       |                 |  |  |
| 101 $\Gamma_{7g}$ | 2.853 | 262 | 56546 | 24.69 | 13 ${}^6E_g$    | 21.80 | 18 ${}^6T_{1g}$ | 14.09 | 20 ${}^6T_{1g}$ |       |                 |  |  |
| 99 $\Gamma_{6g}$  | 2.848 | 277 | 56616 | 33.27 | 19 ${}^6T_{2g}$ | 17.09 | 21 ${}^6T_{2g}$ |       |                 |       |                 |  |  |
| 200 $\Gamma_{8g}$ | 2.853 | 263 | 56651 | 26.90 | 18 ${}^6T_{2g}$ | 10.40 | 12 ${}^6E_g$    | 10.16 | 19 ${}^6T_{2g}$ |       |                 |  |  |
| 102 $\Gamma_{7g}$ | 2.849 | 259 | 56683 | 18.28 | 21 ${}^6T_{2g}$ | 17.92 | 20 ${}^6T_{2g}$ | 12.76 | 12 ${}^6E_g$    |       |                 |  |  |
| 201 $\Gamma_{8g}$ | 2.848 | 278 | 56717 | 25.05 | 18 ${}^6T_{2g}$ | 17.49 | 19 ${}^6T_{1g}$ | 11.28 | 19 ${}^6T_{2g}$ | 10.10 | 12 ${}^6E_g$    |  |  |
| 100 $\Gamma_{6g}$ | 2.849 | 282 | 56757 | 23.00 | 19 ${}^6T_{2g}$ | 12.13 | 20 ${}^6T_{2g}$ | 11.82 | 5 ${}^6A_{2g}$  |       |                 |  |  |
| 103 $\Gamma_{7g}$ | 2.849 | 259 | 56809 | 29.41 | 18 ${}^6T_{2g}$ | 12.65 | 21 ${}^6T_{2g}$ | 10.79 | 19 ${}^6T_{1g}$ |       |                 |  |  |
| 202 $\Gamma_{8g}$ | 2.849 | 279 | 56838 | 20.26 | 19 ${}^6T_{2g}$ | 16.36 | 13 ${}^6E_g$    | 11.70 | 19 ${}^6T_{1g}$ |       |                 |  |  |
| 101 $\Gamma_{6g}$ | 2.848 | 276 | 56946 | 25.92 | 12 ${}^6E_g$    | 21.55 | 21 ${}^6T_{2g}$ | 21.47 | 18 ${}^6T_{2g}$ |       |                 |  |  |
| 203 $\Gamma_{8g}$ | 2.850 | 275 | 56957 | 26.63 | 13 ${}^6E_g$    | 18.92 | 20 ${}^6T_{2g}$ |       |                 |       |                 |  |  |
| 204 $\Gamma_{8g}$ | 2.848 | 274 | 57025 | 21.38 | 21 ${}^6T_{2g}$ | 18.29 | 19 ${}^6T_{2g}$ | 13.86 | 12 ${}^6E_g$    | 12.45 | 19 ${}^6T_{1g}$ |  |  |
| 205 $\Gamma_{8g}$ | 2.849 | 290 | 57062 | 49.04 | 20 ${}^6T_{2g}$ |       |                 |       |                 |       |                 |  |  |
| 102 $\Gamma_{6g}$ | 2.848 | 280 | 57165 | 32.81 | 19 ${}^6T_{1g}$ | 14.66 | 18 ${}^6T_{1g}$ | 10.62 | 20 ${}^6T_{1g}$ | 10.15 | 20 ${}^6T_{2g}$ |  |  |
| 104 $\Gamma_{7g}$ | 2.848 | 276 | 57248 | 32.87 | 19 ${}^6T_{1g}$ | 16.00 | 18 ${}^6T_{1g}$ |       |                 |       |                 |  |  |
| 206 $\Gamma_{8g}$ | 2.848 | 281 | 57283 | 30.58 | 13 ${}^6E_g$    | 13.34 | 18 ${}^6T_{1g}$ |       |                 |       |                 |  |  |
| 103 $\Gamma_{6g}$ | 2.848 | 288 | 57368 | 27.36 | 21 ${}^6T_{2g}$ | 24.61 | 19 ${}^6T_{1g}$ | 12.41 | 20 ${}^6T_{1g}$ |       |                 |  |  |
| 207 $\Gamma_{8g}$ | 2.849 | 277 | 57425 | 33.18 | 19 ${}^6T_{1g}$ | 19.72 | 18 ${}^6T_{1g}$ | 17.22 | 21 ${}^6T_{2g}$ |       |                 |  |  |
| 104 $\Gamma_{6g}$ | 2.849 | 277 | 57430 | 36.39 | 20 ${}^6T_{1g}$ | 14.59 | 21 ${}^6T_{2g}$ | 10.68 | 13 ${}^6E_g$    |       |                 |  |  |
| 208 $\Gamma_{8g}$ | 2.850 | 281 | 57452 | 24.90 | 21 ${}^6T_{2g}$ | 22.46 | 20 ${}^6T_{1g}$ |       |                 |       |                 |  |  |
| 105 $\Gamma_{7g}$ | 2.848 | 280 | 57485 | 31.85 | 19 ${}^6T_{2g}$ | 27.86 | 18 ${}^6T_{1g}$ |       |                 |       |                 |  |  |
| 209 $\Gamma_{8g}$ | 2.848 | 283 | 57518 | 35.48 | 20 ${}^6T_{1g}$ | 13.91 | 18 ${}^6T_{1g}$ | 10.38 | 19 ${}^6T_{2g}$ | 10.25 | 20 ${}^6T_{2g}$ |  |  |
| 210 $\Gamma_{8g}$ | 2.848 | 286 | 57541 | 16.05 | 19 ${}^6T_{2g}$ | 14.01 | 20 ${}^6T_{1g}$ | 13.27 | 5 ${}^6A_{2g}$  | 10.85 | 20 ${}^6T_{2g}$ |  |  |
| 105 $\Gamma_{6g}$ | 2.850 | 286 | 57541 | 17.43 | 19 ${}^6T_{2g}$ | 14.65 | 21 ${}^6T_{2g}$ | 12.32 | 5 ${}^6A_{2g}$  | 10.25 | 13 ${}^6E_g$    |  |  |
| 211 $\Gamma_{8g}$ | 2.849 | 280 | 57619 | 22.04 | 19 ${}^6T_{1g}$ | 18.92 | 18 ${}^6T_{1g}$ | 14.91 | 20 ${}^6T_{1g}$ | 13.81 | 12 ${}^6E_g$    |  |  |
|                   |       |     |       | 10.93 | 19 ${}^6T_{2g}$ |       |                 |       |                 |       |                 |  |  |
| 106 $\Gamma_{6g}$ | 2.849 | 281 | 57624 | 34.44 | 19 ${}^6T_{1g}$ | 24.06 | 12 ${}^6E_g$    | 10.50 | 18 ${}^6T_{1g}$ |       |                 |  |  |
| 106 $\Gamma_{7g}$ | 2.847 | 299 | 57649 | 28.15 | 20 ${}^6T_{2g}$ | 26.44 | 21 ${}^6T_{2g}$ | 10.13 | 18 ${}^6T_{1g}$ |       |                 |  |  |
| 107 $\Gamma_{6g}$ | 2.846 | 290 | 57695 | 28.32 | 21 ${}^6T_{2g}$ | 21.58 | 20 ${}^6T_{1g}$ | 15.85 | 18 ${}^6T_{1g}$ | 15.73 | 19 ${}^6T_{2g}$ |  |  |
| 212 $\Gamma_{8g}$ | 2.847 | 281 | 57754 | 28.25 | 21 ${}^6T_{2g}$ | 15.27 | 19 ${}^6T_{1g}$ | 10.31 | 20 ${}^6T_{1g}$ |       |                 |  |  |
| 213 $\Gamma_{8g}$ | 2.847 | 284 | 57778 | 60.07 | 20 ${}^6T_{1g}$ |       |                 |       |                 |       |                 |  |  |
| 214 $\Gamma_{8g}$ | 2.848 | 283 | 57963 | 39.97 | 20 ${}^6T_{1g}$ | 15.77 | 21 ${}^6T_{2g}$ | 11.97 | 20 ${}^6T_{2g}$ |       |                 |  |  |
| 107 $\Gamma_{7g}$ | 2.848 | 271 | 58071 | 54.95 | 20 ${}^6T_{1g}$ | 14.15 | 20 ${}^6T_{2g}$ |       |                 |       |                 |  |  |
| 215 $\Gamma_{8g}$ | 2.846 | 286 | 58130 | 23.53 | 21 ${}^6T_{2g}$ | 18.66 | 20 ${}^6T_{1g}$ | 13.67 | 20 ${}^6T_{2g}$ | 13.32 | 13 ${}^6E_g$    |  |  |
| 108 $\Gamma_{6g}$ | 2.846 | 291 | 58151 | 34.97 | 20 ${}^6T_{2g}$ | 21.06 | 21 ${}^6T_{2g}$ | 17.68 | 13 ${}^6E_g$    |       |                 |  |  |
| 216 $\Gamma_{8g}$ | 2.847 | 284 | 58208 | 25.93 | 21 ${}^6T_{2g}$ | 25.39 | 20 ${}^6T_{1g}$ | 16.14 | 20 ${}^6T_{2g}$ |       |                 |  |  |
| 217 $\Gamma_{8g}$ | 2.846 | 288 | 58250 | 35.16 | 20 ${}^6T_{1g}$ | 25.57 | 21 ${}^6T_{2g}$ | 13.62 | 20 ${}^6T_{2g}$ |       |                 |  |  |
| 108 $\Gamma_{7g}$ | 2.846 | 280 | 58259 | 41.82 | 20 ${}^6T_{1g}$ | 28.94 | 13 ${}^6E_g$    |       |                 |       |                 |  |  |
| 109 $\Gamma_{6g}$ | 2.848 | 280 | 58285 | 53.00 | 20 ${}^6T_{1g}$ | 22.19 | 20 ${}^6T_{2g}$ |       |                 |       |                 |  |  |

 $4f^7$  excited states $4f^7({}^6P_{3/2,5/2,7/2})^c$ 

|                 |       |     |       |       |                |       |                |  |  |  |  |  |  |
|-----------------|-------|-----|-------|-------|----------------|-------|----------------|--|--|--|--|--|--|
| 2 $\Gamma_{7u}$ | 2.870 | 212 | 29871 | 89.54 | 1 ${}^6T_{1u}$ |       |                |  |  |  |  |  |  |
| 2 $\Gamma_{8u}$ | 2.870 | 212 | 29883 | 89.81 | 1 ${}^6T_{1u}$ |       |                |  |  |  |  |  |  |
| 3 $\Gamma_{8u}$ | 2.870 | 210 | 30250 | 94.06 | 1 ${}^6T_{1u}$ |       |                |  |  |  |  |  |  |
| 2 $\Gamma_{6u}$ | 2.870 | 215 | 30527 | 85.44 | 1 ${}^6T_{1u}$ | 11.88 | 3 ${}^6T_{2u}$ |  |  |  |  |  |  |
| 4 $\Gamma_{8u}$ | 2.870 | 216 | 30532 | 85.58 | 1 ${}^6T_{1u}$ |       |                |  |  |  |  |  |  |
| 3 $\Gamma_{7u}$ | 2.870 | 217 | 30541 | 85.79 | 1 ${}^6T_{1u}$ | 10.37 | 2 ${}^6E_u$    |  |  |  |  |  |  |



|                                      |       |     |       |       |             |       |             |       |                               |
|--------------------------------------|-------|-----|-------|-------|-------------|-------|-------------|-------|-------------------------------|
| 6 $T_{1g}$                           | 2.729 | 308 | 5687  | 46.35 | 1 $7T_{2g}$ | 37.60 | 1 $7A_{2g}$ | 12.73 | 1 $7T_{1g}$                   |
| 3 $A_{1g}$                           | 2.729 | 308 | 5715  | 47.40 | 1 $7T_{2g}$ | 38.81 | 1 $7A_{2g}$ | 10.44 | 1 $7T_{1g}$                   |
| $4f^6(^5D_{0-3})$                    |       |     |       |       |             |       |             |       |                               |
| 4 $A_{1g}$                           | 2.727 | 307 | 19893 | 57.55 | 1 $5T_{2g}$ | 36.69 | 1 $5E_g$    |       |                               |
| 7 $T_{1g}$                           | 2.727 | 307 | 20699 | 58.17 | 1 $5T_{2g}$ | 36.63 | 1 $5E_g$    |       |                               |
| 7 $T_{2g}$                           | 2.727 | 307 | 22337 | 70.60 | 1 $5T_{2g}$ | 24.94 | 1 $5E_g$    |       |                               |
| 5 $E_g$                              | 2.727 | 307 | 22440 | 53.99 | 1 $5E_g$    | 41.49 | 1 $5T_{2g}$ |       |                               |
| 8 $T_{1g}$                           | 2.727 | 307 | 25019 | 85.55 | 1 $5T_{2g}$ | 10.13 | 1 $5E_g$    |       |                               |
| 8 $T_{2g}$                           | 2.727 | 307 | 25063 | 50.23 | 1 $5E_g$    | 45.42 | 1 $5T_{2g}$ |       |                               |
| 3 $A_{2g}$                           | 2.727 | 307 | 25100 | 95.34 | 1 $5E_g$    |       |             |       |                               |
| $4f^6(^5D_4, ^5L_{6-10}, ^5G_{2-6})$ |       |     |       |       |             |       |             |       |                               |
| 9 $T_{2g}$                           | 2.726 | 307 | 28200 | 23.26 | 1 $5T_{1g}$ | 22.66 | 2 $5E_g$    | 16.25 | 4 $5T_{2g}$ 14.50 2 $5T_{1g}$ |
| 5 $A_{1g}$                           | 2.725 | 307 | 28212 | 54.31 | 3 $5T_{2g}$ | 33.41 | 3 $5E_g$    |       |                               |
| 4 $A_{2g}$                           | 2.726 | 307 | 28225 | 37.63 | 1 $5T_{1g}$ | 36.55 | 2 $5E_g$    | 13.47 | 2 $5T_{1g}$                   |
| 9 $T_{1g}$                           | 2.725 | 307 | 28234 | 32.05 | 3 $5T_{2g}$ | 13.37 | 1 $5T_{1g}$ | 13.35 | 2 $5T_{1g}$ 13.30 3 $5E_g$    |
|                                      |       |     |       | 11.10 | 2 $5E_g$    |       |             |       |                               |
| 10 $T_{2g}$                          | 2.726 | 307 | 28378 | 43.45 | 1 $5T_{1g}$ | 14.42 | 2 $5E_g$    | 10.37 | 3 $5T_{2g}$ 10.01 4 $5T_{1g}$ |
| 11 $T_{2g}$                          | 2.726 | 307 | 28379 | 41.40 | 1 $5T_{1g}$ | 35.38 | 1 $5A_{1g}$ |       |                               |
| 6 $E_g$                              | 2.726 | 307 | 28413 | 44.78 | 1 $5T_{1g}$ | 22.10 | 2 $5E_g$    | 18.46 | 1 $5A_{1g}$                   |
| 12 $T_{2g}$                          | 2.726 | 307 | 28463 | 26.80 | 4 $5T_{2g}$ | 16.11 | 1 $5T_{1g}$ | 14.57 | 2 $5E_g$ 10.03 3 $5T_{2g}$    |
| 10 $T_{1g}$                          | 2.726 | 307 | 28513 | 44.39 | 1 $5T_{1g}$ | 20.58 | 2 $5T_{2g}$ |       |                               |
| 7 $E_g$                              | 2.726 | 307 | 28514 | 32.42 | 1 $5A_{1g}$ | 16.62 | 2 $5E_g$    | 11.16 | 2 $5T_{2g}$ 10.23 1 $5T_{2g}$ |
| 13 $T_{2g}$                          | 2.727 | 307 | 28529 | 22.05 | 4 $5T_{2g}$ | 21.42 | 3 $5T_{2g}$ | 17.97 | 3 $5T_{1g}$ 13.05 4 $5E_g$    |
|                                      |       |     |       | 12.66 | 2 $5T_{1g}$ |       |             |       |                               |
| 6 $A_{1g}$                           | 2.727 | 307 | 28605 | 64.54 | 2 $5E_g$    | 13.87 | 2 $5T_{2g}$ | 13.80 | 5 $5T_{2g}$                   |
| 8 $E_g$                              | 2.727 | 308 | 28625 | 31.75 | 3 $5T_{1g}$ | 20.52 | 4 $5T_{2g}$ | 17.19 | 4 $5E_g$ 10.56 2 $5A_{1g}$    |
| 5 $A_{2g}$                           | 2.727 | 307 | 28635 | 40.31 | 2 $5T_{1g}$ | 18.85 | 4 $5E_g$    | 12.64 | 3 $5E_g$                      |
| 14 $T_{2g}$                          | 2.727 | 308 | 28745 | 71.97 | 2 $5T_{2g}$ |       |             |       |                               |
| 11 $T_{1g}$                          | 2.726 | 307 | 28821 | 24.19 | 2 $5T_{1g}$ | 20.91 | 3 $5T_{2g}$ | 10.84 | 4 $5T_{2g}$                   |
| 7 $A_{1g}$                           | 2.726 | 307 | 28845 | 56.55 | 1 $5E_g$    | 36.10 | 1 $5T_{2g}$ |       |                               |
| 9 $E_g$                              | 2.727 | 307 | 28901 | 33.09 | 3 $5E_g$    | 13.60 | 4 $5T_{2g}$ | 11.82 | 2 $5T_{1g}$ 11.74 2 $5T_{2g}$ |
| 12 $T_{1g}$                          | 2.727 | 307 | 28915 | 30.47 | 1 $5E_g$    | 30.35 | 1 $5T_{2g}$ | 10.42 | 2 $5T_{2g}$                   |
| 15 $T_{2g}$                          | 2.727 | 307 | 28924 | 25.04 | 3 $5T_{2g}$ | 12.73 | 2 $5T_{1g}$ | 11.66 | 4 $5E_g$ 10.55 4 $5T_{2g}$    |
| 10 $E_g$                             | 2.727 | 307 | 28968 | 41.04 | 1 $5T_{2g}$ | 30.69 | 1 $5E_g$    | 11.76 | 2 $5E_g$                      |
| 16 $T_{2g}$                          | 2.727 | 307 | 29021 | 25.86 | 2 $5E_g$    | 17.03 | 1 $5T_{1g}$ | 10.86 | 2 $5T_{2g}$                   |
| 17 $T_{2g}$                          | 2.727 | 307 | 29022 | 18.59 | 2 $5E_g$    | 16.29 | 1 $5T_{1g}$ | 11.54 | 1 $5A_{1g}$ 11.23 2 $5T_{2g}$ |
| 18 $T_{2g}$                          | 2.727 | 308 | 29028 | 34.63 | 1 $5T_{2g}$ | 15.48 | 2 $5T_{2g}$ | 13.15 | 1 $5T_{1g}$                   |
| 13 $T_{1g}$                          | 2.727 | 307 | 29088 | 23.07 | 4 $5T_{2g}$ | 20.41 | 4 $5E_g$    | 19.17 | 3 $5T_{1g}$ 13.58 2 $5T_{2g}$ |
| 6 $A_{2g}$                           | 2.727 | 308 | 29114 | 40.96 | 3 $5T_{1g}$ | 24.46 | 4 $5E_g$    | 21.32 | 3 $5E_g$                      |
| 11 $E_g$                             | 2.727 | 308 | 29137 | 55.16 | 2 $5T_{2g}$ |       |             |       |                               |
| 14 $T_{1g}$                          | 2.727 | 307 | 29154 | 34.92 | 2 $5T_{2g}$ |       |             |       |                               |
| 19 $T_{2g}$                          | 2.727 | 308 | 29165 | 28.97 | 3 $5T_{1g}$ | 18.79 | 2 $5A_{1g}$ | 18.04 | 2 $5T_{1g}$ 12.45 3 $5E_g$    |
|                                      |       |     |       | 11.04 | 4 $5T_{2g}$ |       |             |       |                               |
| 12 $E_g$                             | 2.726 | 307 | 29573 | 51.15 | 3 $5T_{2g}$ | 19.91 | 2 $5T_{1g}$ | 14.36 | 4 $5T_{2g}$                   |
| 20 $T_{2g}$                          | 2.726 | 307 | 29601 | 32.48 | 2 $5T_{1g}$ | 27.26 | 3 $5E_g$    | 14.31 | 4 $5T_{2g}$ 10.27 3 $5T_{2g}$ |
| 15 $T_{1g}$                          | 2.726 | 308 | 29686 | 25.67 | 3 $5T_{2g}$ | 16.70 | 4 $5T_{2g}$ | 13.79 | 4 $5E_g$ 12.98 3 $5E_g$       |
|                                      |       |     |       | 11.62 | 2 $5T_{1g}$ | 10.73 | 3 $5T_{1g}$ |       |                               |
| 21 $T_{2g}$                          | 2.727 | 308 | 29787 | 35.80 | 3 $5T_{1g}$ | 13.95 | 4 $5E_g$    | 12.17 | 4 $5T_{2g}$                   |
| 16 $T_{1g}$                          | 2.727 | 308 | 29823 | 48.22 | 3 $5T_{1g}$ | 20.88 | 2 $5T_{1g}$ | 18.84 | 4 $5T_{2g}$                   |
| 8 $A_{1g}$                           | 2.727 | 307 | 29867 | 54.65 | 4 $5E_g$    | 24.86 | 4 $5T_{2g}$ | 14.68 | 3 $5T_{2g}$                   |
| 13 $E_g$                             | 2.726 | 307 | 29901 | 31.66 | 1 $5T_{1g}$ | 17.23 | 2 $5E_g$    | 15.46 | 1 $5A_{1g}$                   |
| 22 $T_{2g}$                          | 2.726 | 307 | 29938 | 35.49 | 1 $5T_{1g}$ | 23.00 | 2 $5E_g$    | 12.90 | 1 $5A_{1g}$                   |
| 14 $E_g$                             | 2.727 | 308 | 29949 | 22.14 | 2 $5A_{1g}$ | 18.69 | 2 $5T_{1g}$ | 16.04 | 4 $5T_{2g}$ 13.77 4 $5E_g$    |
| 7 $A_{2g}$                           | 2.727 | 307 | 29982 | 38.00 | 1 $5T_{1g}$ | 35.33 | 2 $5E_g$    | 12.44 | 4 $5T_{1g}$                   |
| 9 $A_{1g}$                           | 2.727 | 307 | 30116 | 58.63 | 2 $5T_{2g}$ | 15.11 | 5 $5E_g$    | 14.43 | 2 $5E_g$                      |
| 17 $T_{1g}$                          | 2.727 | 307 | 30120 | 51.65 | 2 $5T_{2g}$ |       |             |       |                               |
| 23 $T_{2g}$                          | 2.727 | 307 | 30143 | 48.89 | 2 $5T_{2g}$ | 12.53 | 5 $5T_{1g}$ | 11.75 | 1 $5T_{1g}$                   |
| 8 $A_{2g}$                           | 2.726 | 307 | 30532 | 58.93 | 3 $5E_g$    | 25.10 | 2 $5T_{1g}$ |       |                               |
| 24 $T_{2g}$                          | 2.726 | 307 | 30536 | 30.14 | 2 $5T_{1g}$ | 28.59 | 3 $5T_{2g}$ | 19.51 | 4 $5T_{2g}$                   |
| 18 $T_{1g}$                          | 2.726 | 307 | 30538 | 41.47 | 3 $5T_{2g}$ | 21.47 | 2 $5T_{1g}$ | 21.02 | 4 $5T_{2g}$                   |
| 10 $A_{1g}$                          | 2.726 | 308 | 30632 | 33.15 | 3 $5E_g$    | 29.79 | 4 $5E_g$    | 25.36 | 3 $5T_{2g}$                   |

|    |          |       |     |       |       |             |       |             |       |             |       |             |
|----|----------|-------|-----|-------|-------|-------------|-------|-------------|-------|-------------|-------|-------------|
| 19 | $T_{1g}$ | 2.727 | 308 | 30652 | 41.25 | 3 $5T_{1g}$ | 22.04 | 4 $5T_{2g}$ | 13.91 | 3 $5E_g$    |       |             |
| 15 | $E_g$    | 2.727 | 307 | 30725 | 30.90 | 4 $5E_g$    | 22.99 | 4 $5T_{2g}$ | 19.41 | 2 $5A_{1g}$ |       |             |
| 25 | $T_{2g}$ | 2.727 | 308 | 30815 | 26.82 | 2 $5A_{1g}$ | 22.32 | 2 $5T_{1g}$ | 20.50 | 4 $5T_{2g}$ | 12.53 | 4 $5E_g$    |
|    |          |       |     |       | 12.52 | 3 $5T_{1g}$ |       |             |       |             |       |             |
| 20 | $T_{1g}$ | 2.727 | 308 | 30843 | 42.32 | 3 $5T_{1g}$ | 36.79 | 4 $5E_g$    |       |             |       |             |
| 21 | $T_{1g}$ | 2.725 | 307 | 31577 | 57.80 | 3 $5T_{2g}$ | 20.90 | 3 $5E_g$    | 13.20 | 2 $5T_{1g}$ |       |             |
| 16 | $E_g$    | 2.726 | 307 | 31632 | 31.49 | 3 $5T_{2g}$ | 31.00 | 2 $5T_{1g}$ | 28.83 | 3 $5E_g$    |       |             |
| 22 | $T_{1g}$ | 2.726 | 307 | 31652 | 40.58 | 2 $5T_{1g}$ | 25.89 | 3 $5E_g$    | 18.08 | 3 $5T_{2g}$ |       |             |
| 11 | $A_{1g}$ | 2.726 | 308 | 31704 | 60.74 | 4 $5T_{2g}$ | 24.63 | 3 $5E_g$    | 11.78 | 4 $5E_g$    |       |             |
| 23 | $T_{1g}$ | 2.727 | 307 | 31755 | 39.44 | 4 $5T_{2g}$ | 24.09 | 2 $5T_{1g}$ | 16.00 | 4 $5E_g$    | 12.58 | 3 $5T_{1g}$ |
| 26 | $T_{2g}$ | 2.727 | 308 | 31799 | 36.28 | 4 $5T_{2g}$ | 28.85 | 3 $5T_{1g}$ | 11.58 | 4 $5E_g$    |       |             |
| 9  | $A_{2g}$ | 2.727 | 308 | 31982 | 50.80 | 4 $5E_g$    | 40.85 | 3 $5T_{1g}$ |       |             |       |             |
| 27 | $T_{2g}$ | 2.727 | 308 | 32020 | 43.26 | 3 $5T_{1g}$ | 26.92 | 4 $5E_g$    | 24.22 | 2 $5A_{1g}$ |       |             |
| 17 | $E_g$    | 2.727 | 308 | 32034 | 42.99 | 3 $5T_{1g}$ | 30.67 | 2 $5A_{1g}$ | 21.76 | 4 $5E_g$    |       |             |

<sup>a</sup> Absorption oscillator strengths for  $1 \Gamma_{6u,8u,7u} \rightarrow i$  transitions are calculated at  $d_{E_{u-F}} = 2.850 \text{ \AA}$ ; the reference value is  $f_{ref} = 5.062 \times 10^{-3}$ . Emission oscillator strengths for  $1 \Gamma_{8g} \rightarrow 1 \Gamma_{6u,1} \Gamma_{8u,1} \Gamma_{7u}$  and radiative emission lifetime are calculated at  $d_{E_{u-F}} = 2.800 \text{ \AA}$ ; the reference value is  $f_{ref} = 8.993 \times 10^{-4}$ .

<sup>b</sup> The analyses of the wave functions have been done at  $d_{E_{u-F}} = 2.850 \text{ \AA}$  ( $4f^7$ ),  $2.850 \text{ \AA}$  ( $4f^6(5d^1 + 6sa_{1g}^1)$ ),  $2.700 \text{ \AA}$  ( $4f^6$ ).

<sup>c</sup> C.f. Table S7.

<sup>d</sup> C.f. Table S8.

TABLE S13: Spectroscopic constants and analyses of the spin-orbit wave functions of the ground and lowest lying excited states of  $\text{Eu}^{2+}$  and  $\text{Eu}^{3+}$ -doped SrS octahedral defects. Eu-S bond distances ( $d_{\text{Eu-S},e}$  in Å),  $\text{EuS}_6$  breathing mode harmonic vibrational frequencies ( $\omega_{a_{1g}}$  in  $\text{cm}^{-1}$ ), minimum-to-minimum energy differences ( $T_e$  in  $\text{cm}^{-1}$ ), and relative absorption and emission oscillator strengths ( $f_i^{abs}/f_{ref}$  and  $f_i^{emi}/f_{ref}$ ) are given. Calculated radiative emission lifetime for the  $4f^6(^7F_J)5dt_{2g}^1 - 1\Gamma_{8g}$  excited state is  $0.306 \mu\text{s}$ . Local distortion around the  $\text{Eu}^{2+}$  impurity, relative to experimental crystal structure  $d_{\text{Sr-F}} = 3.010 \text{ \AA}$ , is  $d_{\text{Eu-S},e}(1\Gamma_{6u}) - d_{\text{Sr-S}} = -0.035$ ; ionic radii mismatch is  $-0.01 \text{ \AA}^{31}$ . See Fig. 3, S3 and text for details.

| State                                                   | $d_{\text{Eu-S},e}$ | $\omega_{a_{1g}}$ | $T_e$ | $f_i^{abs}/f_{ref}$ <sup>a</sup> | $f_i^{emi}/f_{ref}$ <sup>a</sup> | weights of terms larger than 10% <sup>b</sup> |       |              |       |              |       |              |
|---------------------------------------------------------|---------------------|-------------------|-------|----------------------------------|----------------------------------|-----------------------------------------------|-------|--------------|-------|--------------|-------|--------------|
| Eu <sup>2+</sup> -doped SrS                             |                     |                   |       |                                  |                                  |                                               |       |              |       |              |       |              |
| $4f^7(^8S_{7/2})$ <sup>c</sup>                          |                     |                   |       |                                  |                                  |                                               |       |              |       |              |       |              |
| 1 $\Gamma_{8u}$                                         | 2.975               | 273               | 0     | 0.39                             | 97.71                            | 1 $^8A_{1g}$                                  |       |              |       |              |       |              |
| 1 $\Gamma_{6u}$                                         | 2.975               | 273               | 0     | 1.00                             | 97.70                            | 1 $^8A_{1g}$                                  |       |              |       |              |       |              |
| 1 $\Gamma_{7u}$                                         | 2.975               | 273               | 0     | 0.06                             | 97.70                            | 1 $^8A_{1g}$                                  |       |              |       |              |       |              |
| $4f^6(5d+6s)^1$ excited states                          |                     |                   |       |                                  |                                  |                                               |       |              |       |              |       |              |
| $4f^6(^7F_J)5dt_{2g}^1$ High-Spin coupling <sup>d</sup> |                     |                   |       |                                  |                                  |                                               |       |              |       |              |       |              |
| 1 $\Gamma_{8g}$                                         | 2.945               | 263               | 18978 | 1.00                             | 35.23                            | 1 $^8T_{1g}$                                  | 24.67 | 1 $^8E_g$    | 20.92 | 1 $^8T_{2g}$ | 11.57 | 2 $^8T_{1g}$ |
| 2 $\Gamma_{8g}$                                         | 2.945               | 263               | 19368 | 0.88                             | 31.83                            | 1 $^8T_{2g}$                                  | 28.46 | 1 $^8T_{1g}$ | 22.31 | 1 $^8E_g$    | 11.17 | 2 $^8T_{1g}$ |
| 1 $\Gamma_{7g}$                                         | 2.944               | 264               | 19626 | 1.44                             | 51.15                            | 1 $^8T_{2g}$                                  | 28.10 | 2 $^8T_{1g}$ |       |              |       |              |
| 3 $\Gamma_{8g}$                                         | 2.944               | 263               | 19949 | 1.43                             | 40.37                            | 1 $^8T_{2g}$                                  | 24.78 | 1 $^8E_g$    | 16.40 | 1 $^8T_{1g}$ | 10.40 | 2 $^8T_{1g}$ |
| 1 $\Gamma_{6g}$                                         | 2.944               | 263               | 19993 | 0.51                             | 42.98                            | 1 $^8T_{1g}$                                  | 30.45 | 1 $^8E_g$    |       |              |       |              |
| 2 $\Gamma_{7g}$                                         | 2.944               | 264               | 20246 | 2.22                             | 34.97                            | 1 $^8T_{2g}$                                  | 32.16 | 2 $^8T_{1g}$ | 16.73 | 1 $^8E_g$    | 10.13 | 1 $^8T_{1g}$ |
| 4 $\Gamma_{8g}$                                         | 2.944               | 263               | 20670 | 1.70                             | 34.79                            | 1 $^8T_{2g}$                                  | 24.41 | 1 $^8T_{1g}$ | 17.07 | 1 $^8E_g$    | 15.64 | 2 $^8T_{1g}$ |
| 2 $\Gamma_{6g}$                                         | 2.944               | 263               | 20743 | 0.41                             | 47.02                            | 1 $^8T_{1g}$                                  | 20.98 | 1 $^8E_g$    | 12.56 | 2 $^8T_{1g}$ | 10.58 | 1 $^8T_{2g}$ |
| 5 $\Gamma_{8g}$                                         | 2.944               | 263               | 21010 | 5.73                             | 38.76                            | 2 $^8T_{1g}$                                  | 27.90 | 1 $^8T_{1g}$ | 24.40 | 1 $^8T_{2g}$ |       |              |
| 6 $\Gamma_{8g}$                                         | 2.944               | 263               | 21491 | 1.78                             | 41.74                            | 1 $^8T_{1g}$                                  | 18.74 | 1 $^8E_g$    | 13.90 | 2 $^8T_{1g}$ | 11.69 | 1 $^8T_{2g}$ |
| 3 $\Gamma_{7g}$                                         | 2.943               | 262               | 21536 | 2.68                             | 36.34                            | 2 $^8T_{1g}$                                  | 13.29 | 2 $^8T_{2g}$ | 12.90 | 1 $^8E_g$    | 10.03 | 1 $^8T_{2g}$ |
| 7 $\Gamma_{8g}$                                         | 2.943               | 264               | 21596 | 3.23                             | 45.56                            | 1 $^8T_{2g}$                                  | 14.19 | 1 $^8T_{1g}$ | 14.19 | 2 $^8T_{1g}$ |       |              |
| 3 $\Gamma_{6g}$                                         | 2.943               | 263               | 21786 | 0.61                             | 26.15                            | 2 $^8E_g$                                     | 24.06 | 1 $^8T_{2g}$ | 18.39 | 3 $^8T_{1g}$ | 14.63 | 2 $^8T_{2g}$ |
| 8 $\Gamma_{8g}$                                         | 2.943               | 264               | 21902 | 0.95                             | 18.32                            | 2 $^8T_{2g}$                                  | 17.27 | 2 $^8E_g$    | 16.89 | 3 $^8T_{1g}$ | 10.70 | 2 $^8T_{1g}$ |
| 4 $\Gamma_{6g}$                                         | 2.943               | 263               | 21903 | 1.11                             | 39.62                            | 2 $^8T_{1g}$                                  | 19.12 | 1 $^8T_{2g}$ | 17.25 | 1 $^8T_{1g}$ |       |              |
| 4 $\Gamma_{7g}$                                         | 2.943               | 262               | 22004 | 1.11                             | 19.35                            | 2 $^8E_g$                                     | 18.87 | 1 $^8E_g$    | 16.83 | 2 $^8T_{2g}$ | 12.97 | 3 $^8T_{1g}$ |
|                                                         |                     |                   |       |                                  | 10.69                            | 1 $^8T_{1g}$                                  |       |              |       |              |       |              |
| 9 $\Gamma_{8g}$                                         | 2.944               | 263               | 22242 | 1.61                             | 21.57                            | 1 $^8E_g$                                     | 21.27 | 1 $^8T_{2g}$ | 16.46 | 2 $^8T_{1g}$ | 15.96 | 1 $^8T_{1g}$ |
|                                                         |                     |                   |       |                                  | 10.54                            | 2 $^8E_g$                                     |       |              |       |              |       |              |
| 5 $\Gamma_{7g}$                                         | 2.943               | 263               | 22331 | 1.18                             | 49.84                            | 1 $^8T_{1g}$                                  | 28.33 | 1 $^8T_{2g}$ |       |              |       |              |
| 5 $\Gamma_{6g}$                                         | 2.943               | 263               | 22459 | 1.19                             | 37.32                            | 1 $^8T_{2g}$                                  | 17.50 | 2 $^8T_{1g}$ | 16.33 | 2 $^8T_{2g}$ |       |              |
| 10 $\Gamma_{8g}$                                        | 2.943               | 263               | 22662 | 0.55                             | 30.33                            | 2 $^8E_g$                                     | 28.39 | 2 $^8T_{2g}$ | 11.58 | 3 $^8T_{1g}$ |       |              |
| 6 $\Gamma_{7g}$                                         | 2.943               | 262               | 22697 | 2.84                             | 35.94                            | 1 $^8T_{1g}$                                  | 23.14 | 2 $^8T_{1g}$ | 19.72 | 1 $^8E_g$    | 14.51 | 1 $^8T_{2g}$ |
| 11 $\Gamma_{8g}$                                        | 2.943               | 262               | 22770 | 3.72                             | 38.20                            | 2 $^8T_{1g}$                                  | 33.14 | 1 $^8E_g$    | 11.81 | 1 $^8T_{2g}$ |       |              |
| 12 $\Gamma_{8g}$                                        | 2.943               | 264               | 22852 | 0.68                             | 35.35                            | 2 $^8E_g$                                     | 21.15 | 3 $^8T_{1g}$ |       |              |       |              |
| 7 $\Gamma_{7g}$                                         | 2.943               | 263               | 22966 | 0.65                             | 25.44                            | 1 $^8T_{2g}$                                  | 18.65 | 3 $^8T_{1g}$ | 17.00 | 2 $^8T_{1g}$ | 12.59 | 2 $^8T_{2g}$ |
| 6 $\Gamma_{6g}$                                         | 2.943               | 263               | 22966 | 0.82                             | 26.60                            | 1 $^8T_{1g}$                                  | 22.40 | 2 $^8T_{2g}$ | 10.77 | 2 $^8T_{1g}$ |       |              |
| 7 $\Gamma_{6g}$                                         | 2.943               | 263               | 23284 | 4.50                             | 27.20                            | 2 $^8T_{1g}$                                  | 25.01 | 1 $^8T_{1g}$ | 23.36 | 1 $^8T_{2g}$ | 14.11 | 1 $^8E_g$    |
| 13 $\Gamma_{8g}$                                        | 2.943               | 262               | 23354 | 6.19                             | 25.96                            | 2 $^8T_{1g}$                                  | 23.85 | 1 $^8T_{2g}$ | 21.86 | 1 $^8T_{1g}$ | 12.67 | 1 $^8E_g$    |
| 14 $\Gamma_{8g}$                                        | 2.943               | 263               | 23453 | 0.78                             | 39.39                            | 1 $^8T_{2g}$                                  | 20.03 | 1 $^8E_g$    | 14.08 | 2 $^8T_{2g}$ | 10.00 | 2 $^8E_g$    |
| 15 $\Gamma_{8g}$                                        | 2.943               | 264               | 23528 | 2.35                             | 20.34                            | 1 $^8T_{1g}$                                  | 18.53 | 1 $^8E_g$    | 17.31 | 2 $^8E_g$    | 16.03 | 2 $^8T_{1g}$ |
| 16 $\Gamma_{8g}$                                        | 2.943               | 263               | 23736 | 1.16                             | 23.66                            | 2 $^8E_g$                                     | 15.60 | 2 $^8T_{2g}$ | 12.07 | 1 $^8T_{1g}$ |       |              |
| 8 $\Gamma_{7g}$                                         | 2.943               | 263               | 23760 | 1.21                             | 20.43                            | 3 $^8T_{1g}$                                  | 12.34 | 2 $^8E_g$    | 11.93 | 2 $^8T_{1g}$ |       |              |
| 9 $\Gamma_{7g}$                                         | 2.943               | 263               | 23974 | 1.17                             | 20.98                            | 2 $^8T_{1g}$                                  | 19.54 | 3 $^8T_{1g}$ | 14.14 | 2 $^8E_g$    | 10.76 | 1 $^8T_{1g}$ |
| 17 $\Gamma_{8g}$                                        | 2.943               | 264               | 24016 | 2.65                             | 23.51                            | 2 $^8T_{1g}$                                  | 18.79 | 3 $^8T_{1g}$ | 14.26 | 2 $^8T_{2g}$ |       |              |
| 18 $\Gamma_{8g}$                                        | 2.943               | 264               | 24118 | 5.16                             | 32.06                            | 2 $^8T_{1g}$                                  | 19.95 | 2 $^8T_{2g}$ | 17.00 | 1 $^8T_{1g}$ | 13.37 | 3 $^8T_{1g}$ |
| 8 $\Gamma_{6g}$                                         | 2.943               | 263               | 24121 | 0.75                             | 31.05                            | 2 $^8T_{2g}$                                  | 16.39 | 1 $^8E_g$    | 11.85 | 1 $^8T_{2g}$ |       |              |
| 9 $\Gamma_{6g}$                                         | 2.943               | 264               | 24254 | 0.30                             | 27.47                            | 1 $^8T_{2g}$                                  | 17.68 | 2 $^8E_g$    |       |              |       |              |
| 19 $\Gamma_{8g}$                                        | 2.943               | 264               | 24304 | 0.37                             | 24.42                            | 1 $^8T_{2g}$                                  | 24.27 | 1 $^8T_{1g}$ | 15.60 | 2 $^8E_g$    | 14.67 | 1 $^8E_g$    |
| 10 $\Gamma_{7g}$                                        | 2.943               | 263               | 24412 | 0.03                             | 34.81                            | 1 $^8T_{1g}$                                  | 18.07 | 1 $^8T_{2g}$ | 14.73 | 1 $^8E_g$    | 11.97 | 2 $^8E_g$    |

|                                                        |       |     |       |      |       |             |       |             |       |             |       |             |  |  |  |  |  |  |  |  |
|--------------------------------------------------------|-------|-----|-------|------|-------|-------------|-------|-------------|-------|-------------|-------|-------------|--|--|--|--|--|--|--|--|
| 10 $\Gamma_{6g}$                                       | 2.943 | 264 | 24567 | 5.08 | 11.33 | $2^8T_{1g}$ |       |             |       |             |       |             |  |  |  |  |  |  |  |  |
| 20 $\Gamma_{8g}$                                       | 2.943 | 263 | 24581 | 9.50 | 53.95 | $2^8T_{1g}$ | 17.78 | $1^8T_{2g}$ |       |             |       |             |  |  |  |  |  |  |  |  |
| 21 $\Gamma_{8g}$                                       | 2.943 | 264 | 24702 | 8.09 | 38.50 | $2^8T_{1g}$ | 20.12 | $1^8T_{1g}$ | 11.88 | $1^8E_g$    |       |             |  |  |  |  |  |  |  |  |
| 11 $\Gamma_{6g}$                                       | 2.943 | 263 | 25055 | 0.06 | 39.14 | $2^8T_{1g}$ | 21.27 | $2^8T_{2g}$ | 13.53 | $1^8T_{2g}$ | 10.28 | $3^8T_{1g}$ |  |  |  |  |  |  |  |  |
| 22 $\Gamma_{8g}$                                       | 2.943 | 264 | 25122 | 0.56 | 29.50 | $2^8T_{2g}$ | 27.15 | $2^8E_g$    | 10.81 | $1^8T_{1g}$ |       |             |  |  |  |  |  |  |  |  |
| 23 $\Gamma_{8g}$                                       | 2.943 | 263 | 25134 | 0.89 | 52.90 | $2^8T_{2g}$ | 16.19 | $3^8T_{1g}$ | 11.49 | $2^8E_g$    |       |             |  |  |  |  |  |  |  |  |
| 11 $\Gamma_{7g}$                                       | 2.943 | 264 | 25194 | 0.01 | 41.89 | $2^8T_{2g}$ | 13.13 | $2^8E_g$    | 12.44 | $3^8T_{1g}$ |       |             |  |  |  |  |  |  |  |  |
| 12 $\Gamma_{6g}$                                       | 2.942 | 264 | 25306 | 1.30 | 63.17 | $2^8T_{2g}$ |       |             |       |             |       |             |  |  |  |  |  |  |  |  |
| 24 $\Gamma_{8g}$                                       | 2.943 | 264 | 25408 | 0.86 | 44.91 | $3^8T_{1g}$ | 15.07 | $2^8T_{2g}$ |       |             |       |             |  |  |  |  |  |  |  |  |
| 12 $\Gamma_{7g}$                                       | 2.943 | 263 | 25437 | 0.47 | 56.33 | $3^8T_{1g}$ | 17.91 | $2^8T_{2g}$ |       |             |       |             |  |  |  |  |  |  |  |  |
| 25 $\Gamma_{8g}$                                       | 2.945 | 264 | 25676 | 0.01 | 58.48 | $3^8T_{1g}$ | 10.67 | $2^8E_g$    |       |             |       |             |  |  |  |  |  |  |  |  |
| 26 $\Gamma_{8g}$                                       | 2.942 | 263 | 25901 | 0.20 | 85.38 | $1^6T_{1g}$ |       |             |       |             |       |             |  |  |  |  |  |  |  |  |
| 13 $\Gamma_{7g}$                                       | 2.942 | 263 | 26000 | 0.01 | 49.51 | $2^8T_{2g}$ | 14.51 | $2^8E_g$    |       |             |       |             |  |  |  |  |  |  |  |  |
| 27 $\Gamma_{8g}$                                       | 2.942 | 264 | 26303 | 0.83 | 48.72 | $2^8T_{2g}$ | 11.87 | $2^8E_g$    |       |             |       |             |  |  |  |  |  |  |  |  |
| 13 $\Gamma_{6g}$                                       | 2.942 | 264 | 26332 | 0.27 | 51.39 | $3^8T_{1g}$ | 26.44 | $2^8T_{2g}$ | 11.18 | $2^8E_g$    |       |             |  |  |  |  |  |  |  |  |
| 28 $\Gamma_{8g}$                                       | 2.942 | 264 | 26418 | 0.89 | 40.46 | $3^8T_{1g}$ | 36.63 | $2^8T_{2g}$ |       |             |       |             |  |  |  |  |  |  |  |  |
| 14 $\Gamma_{7g}$                                       | 2.942 | 263 | 26757 | 0.36 | 57.44 | $3^8T_{1g}$ | 18.11 | $2^8E_g$    | 14.92 | $2^8T_{2g}$ |       |             |  |  |  |  |  |  |  |  |
| 29 $\Gamma_{8g}$                                       | 2.942 | 263 | 26815 | 0.76 | 44.20 | $3^8T_{1g}$ |       |             |       |             |       |             |  |  |  |  |  |  |  |  |
| 14 $\Gamma_{6g}$                                       | 2.942 | 263 | 26836 | 0.40 | 47.40 | $3^8T_{1g}$ |       |             |       |             |       |             |  |  |  |  |  |  |  |  |
|                                                        |       |     |       |      | 47.76 | $3^8T_{1g}$ |       |             |       |             |       |             |  |  |  |  |  |  |  |  |
| $4f^6(^7F_J)5dt^1_{2g}$ Low-Spin coupling <sup>d</sup> |       |     |       |      |       |             |       |             |       |             |       |             |  |  |  |  |  |  |  |  |
| 30 $\Gamma_{8g}$                                       | 2.944 | 264 | 26963 |      | 79.64 | $1^6T_{1g}$ |       |             |       |             |       |             |  |  |  |  |  |  |  |  |
| 15 $\Gamma_{7g}$                                       | 2.944 | 264 | 26976 |      | 78.16 | $1^6T_{1g}$ | 10.26 | $1^6T_{2g}$ |       |             |       |             |  |  |  |  |  |  |  |  |
| 16 $\Gamma_{7g}$                                       | 2.941 | 263 | 28524 | 0.01 | 36.27 | $2^6T_{1g}$ | 34.88 | $1^6E_g$    | 22.23 | $1^6T_{1g}$ |       |             |  |  |  |  |  |  |  |  |
| 15 $\Gamma_{6g}$                                       | 2.942 | 264 | 28704 | 0.05 | 53.53 | $1^6T_{1g}$ | 29.25 | $1^6T_{2g}$ |       |             |       |             |  |  |  |  |  |  |  |  |
| 31 $\Gamma_{8g}$                                       | 2.942 | 264 | 28727 | 0.09 | 52.96 | $1^6T_{1g}$ | 28.41 | $1^6T_{2g}$ |       |             |       |             |  |  |  |  |  |  |  |  |
| 32 $\Gamma_{8g}$                                       | 2.940 | 264 | 28961 | 0.01 | 51.52 | $2^6T_{1g}$ | 25.80 | $1^6E_g$    |       |             |       |             |  |  |  |  |  |  |  |  |
| 17 $\Gamma_{7g}$                                       | 2.941 | 264 | 29020 | 0.03 | 29.11 | $1^6T_{2g}$ | 28.60 | $1^6T_{1g}$ | 27.74 | $2^6T_{1g}$ |       |             |  |  |  |  |  |  |  |  |
| 16 $\Gamma_{6g}$                                       | 2.940 | 264 | 29178 | 0.01 | 28.13 | $2^6T_{2g}$ | 20.56 | $1^6T_{2g}$ | 16.55 | $1^6E_g$    | 13.93 | $2^6T_{2g}$ |  |  |  |  |  |  |  |  |
| 33 $\Gamma_{8g}$                                       | 2.940 | 264 | 29496 | 0.03 | 24.36 | $2^6T_{1g}$ | 22.18 | $1^6E_g$    | 19.51 | $2^6T_{2g}$ | 13.81 | $1^6A_{2g}$ |  |  |  |  |  |  |  |  |
| 18 $\Gamma_{7g}$                                       | 2.942 | 264 | 29636 | 0.02 | 40.70 | $1^6T_{1g}$ | 25.53 | $2^6T_{1g}$ | 16.22 | $1^6T_{2g}$ |       |             |  |  |  |  |  |  |  |  |
| 17 $\Gamma_{6g}$                                       | 2.940 | 263 | 29807 | 0.02 | 39.50 | $1^6T_{2g}$ | 38.31 | $2^6T_{1g}$ |       |             |       |             |  |  |  |  |  |  |  |  |
| 34 $\Gamma_{8g}$                                       | 2.940 | 263 | 30012 | 0.01 | 21.98 | $1^6A_{2g}$ | 20.77 | $2^6T_{2g}$ | 12.55 | $1^6T_{1g}$ | 11.57 | $1^6T_{2g}$ |  |  |  |  |  |  |  |  |
|                                                        |       |     |       |      | 11.15 | $2^6T_{1g}$ |       |             |       |             |       |             |  |  |  |  |  |  |  |  |
| 35 $\Gamma_{8g}$                                       | 2.941 | 264 | 30196 | 0.08 | 31.41 | $2^6T_{1g}$ | 27.92 | $1^6T_{2g}$ | 15.85 | $1^6E_g$    |       |             |  |  |  |  |  |  |  |  |
| 18 $\Gamma_{6g}$                                       | 2.939 | 263 | 30217 | 0.01 | 28.22 | $1^6A_{2g}$ | 18.90 | $2^6T_{2g}$ | 16.15 | $2^6T_{1g}$ | 12.28 | $1^6T_{2g}$ |  |  |  |  |  |  |  |  |
| 36 $\Gamma_{8g}$                                       | 2.940 | 264 | 30399 | 0.07 | 28.29 | $1^6E_g$    | 22.84 | $1^6T_{2g}$ | 18.28 | $2^6T_{1g}$ |       |             |  |  |  |  |  |  |  |  |
| 19 $\Gamma_{6g}$                                       | 2.941 | 264 | 30768 | 0.06 | 38.32 | $1^6E_g$    | 29.13 | $1^6T_{2g}$ | 20.59 | $2^6T_{2g}$ |       |             |  |  |  |  |  |  |  |  |
| 37 $\Gamma_{8g}$                                       | 2.939 | 262 | 30949 | 0.08 | 21.44 | $1^6E_g$    | 20.69 | $3^6T_{1g}$ | 19.72 | $2^6T_{1g}$ | 12.31 | $2^6T_{2g}$ |  |  |  |  |  |  |  |  |
| 38 $\Gamma_{8g}$                                       | 2.939 | 264 | 31031 | 0.04 | 28.94 | $2^6T_{2g}$ | 19.43 | $1^6T_{1g}$ | 19.27 | $2^6E_g$    | 13.54 | $3^6T_{1g}$ |  |  |  |  |  |  |  |  |
| 19 $\Gamma_{7g}$                                       | 2.941 | 263 | 31235 |      | 47.34 | $2^6T_{1g}$ | 33.05 | $1^6T_{2g}$ |       |             |       |             |  |  |  |  |  |  |  |  |
| 20 $\Gamma_{6g}$                                       | 2.939 | 263 | 31433 | 0.01 | 36.41 | $2^6E_g$    | 25.06 | $2^6T_{2g}$ | 19.00 | $1^6E_g$    |       |             |  |  |  |  |  |  |  |  |
| 20 $\Gamma_{7g}$                                       | 2.938 | 263 | 31480 | 0.06 | 37.00 | $3^6T_{1g}$ | 17.75 | $2^6T_{1g}$ | 16.08 | $2^6E_g$    | 12.37 | $1^6A_{1g}$ |  |  |  |  |  |  |  |  |
| 39 $\Gamma_{8g}$                                       | 2.938 | 264 | 31727 | 0.03 | 23.40 | $2^6E_g$    | 20.67 | $2^6T_{2g}$ | 15.51 | $1^6A_{2g}$ | 15.13 | $3^6T_{1g}$ |  |  |  |  |  |  |  |  |
| 21 $\Gamma_{6g}$                                       | 2.941 | 263 | 31754 | 0.06 | 47.69 | $1^6T_{2g}$ | 14.66 | $3^6T_{1g}$ | 10.39 | $2^6T_{1g}$ | 10.05 | $1^6E_g$    |  |  |  |  |  |  |  |  |
| 40 $\Gamma_{8g}$                                       | 2.941 | 263 | 31880 | 0.04 | 34.51 | $2^6T_{1g}$ | 25.89 | $1^6T_{2g}$ | 14.99 | $2^6T_{2g}$ |       |             |  |  |  |  |  |  |  |  |
| 21 $\Gamma_{7g}$                                       | 2.940 | 263 | 32108 | 0.02 | 35.16 | $2^6T_{1g}$ | 23.00 | $1^6E_g$    | 18.87 | $3^6T_{1g}$ | 15.96 | $2^6T_{2g}$ |  |  |  |  |  |  |  |  |
| 41 $\Gamma_{8g}$                                       | 2.938 | 264 | 32128 | 0.07 | 32.73 | $2^6T_{2g}$ | 22.27 | $3^6T_{1g}$ | 15.72 | $1^6T_{2g}$ | 11.85 | $1^6A_{1g}$ |  |  |  |  |  |  |  |  |
| 42 $\Gamma_{8g}$                                       | 2.941 | 264 | 32298 | 0.10 | 32.53 | $2^6T_{1g}$ | 30.51 | $1^6T_{2g}$ | 15.63 | $1^6E_g$    |       |             |  |  |  |  |  |  |  |  |
| 22 $\Gamma_{7g}$                                       | 2.938 | 264 | 32406 | 0.03 | 34.70 | $2^6E_g$    | 25.74 | $3^6T_{1g}$ | 16.59 | $1^6E_g$    |       |             |  |  |  |  |  |  |  |  |
| 43 $\Gamma_{8g}$                                       | 2.941 | 263 | 32613 | 0.19 | 52.54 | $1^6T_{2g}$ | 17.31 | $1^6E_g$    | 14.62 | $2^6T_{1g}$ |       |             |  |  |  |  |  |  |  |  |
| 23 $\Gamma_{7g}$                                       | 2.938 | 263 | 32967 | 0.02 | 55.75 | $2^6T_{2g}$ | 23.03 | $1^6A_{1g}$ |       |             |       |             |  |  |  |  |  |  |  |  |
| 44 $\Gamma_{8g}$                                       | 2.938 | 263 | 33093 | 0.04 | 23.61 | $2^6T_{2g}$ | 20.46 | $1^6A_{1g}$ | 13.95 | $2^6E_g$    | 12.31 | $3^6T_{1g}$ |  |  |  |  |  |  |  |  |
|                                                        |       |     |       |      | 11.19 | $1^6A_{2g}$ |       |             |       |             |       |             |  |  |  |  |  |  |  |  |
| 22 $\Gamma_{6g}$                                       | 2.938 | 263 | 33127 | 0.01 | 28.55 | $3^6T_{1g}$ | 25.18 | $1^6A_{2g}$ | 22.33 | $2^6T_{2g}$ | 16.63 | $1^6T_{2g}$ |  |  |  |  |  |  |  |  |
| 45 $\Gamma_{8g}$                                       | 2.939 | 262 | 33293 | 0.01 | 33.04 | $3^6T_{1g}$ | 23.86 | $2^6T_{2g}$ | 20.38 | $2^6E_g$    |       |             |  |  |  |  |  |  |  |  |
| 46 $\Gamma_{8g}$                                       | 2.938 | 264 | 33316 | 0.03 | 49.36 | $3^6T_{1g}$ | 17.08 | $2^6E_g$    | 11.03 | $2^6T_{2g}$ | 10.01 | $2^6T_{1g}$ |  |  |  |  |  |  |  |  |
| 23 $\Gamma_{6g}$                                       | 2.938 | 263 | 34376 | 0.02 | 39.61 | $3^6T_{1g}$ | 37.39 | $2^6T_{2g}$ | 13.38 | $1^6A_{2g}$ |       |             |  |  |  |  |  |  |  |  |
| 47 $\Gamma_{8g}$                                       | 2.938 | 263 | 34426 | 0.01 | 42.28 | $2^6T_{2g}$ | 26.28 | $2^6E_g$    | 15.49 | $1^6A_{2g}$ | 10.09 | $3^6T_{1g}$ |  |  |  |  |  |  |  |  |
| 24 $\Gamma_{7g}$                                       | 2.938 | 263 | 34557 | 0.02 | 52.89 | $3^6T_{1g}$ | 34.56 | $2^6E_g$    |       |             |       |             |  |  |  |  |  |  |  |  |
| 48 $\Gamma_{8g}$                                       | 2.938 | 263 | 34575 | 0.03 | 34.40 | $2^6E_g$    | 34.02 | $3^6T_{1g}$ | 24.51 | $2^6T_{2g}$ |       |             |  |  |  |  |  |  |  |  |

|                                                                                   |       |     |       |       |       |             |       |             |       |             |       |             |  |  |
|-----------------------------------------------------------------------------------|-------|-----|-------|-------|-------|-------------|-------|-------------|-------|-------------|-------|-------------|--|--|
| 24 $\Gamma_{6g}$                                                                  | 2.938 | 263 | 34624 | 0.01  | 45.15 | $2^6E_g$    | 41.07 | $2^6T_{2g}$ |       |             |       |             |  |  |
| $4f^6(^7F_J)(5de_1^1 + 6sa_1^1)$ High-, Low- and Mixed-Spin coupling <sup>d</sup> |       |     |       |       |       |             |       |             |       |             |       |             |  |  |
| 50 $\Gamma_{8g}$                                                                  | 2.983 | 262 | 39417 | 6.41  | 61.54 | $3^8T_{2g}$ | 28.77 | $4^8T_{1g}$ |       |             |       |             |  |  |
| 26 $\Gamma_{7g}$                                                                  | 2.983 | 263 | 39514 | 2.87  | 68.46 | $3^8T_{2g}$ | 26.90 | $4^8T_{1g}$ |       |             |       |             |  |  |
| 51 $\Gamma_{8g}$                                                                  | 2.983 | 262 | 39646 | 0.85  | 79.34 | $3^8T_{2g}$ | 10.10 | $3^8E_g$    |       |             |       |             |  |  |
| 27 $\Gamma_{7g}$                                                                  | 2.982 | 262 | 40133 | 6.08  | 50.61 | $4^8T_{1g}$ | 35.09 | $3^8T_{2g}$ |       |             |       |             |  |  |
| 52 $\Gamma_{8g}$                                                                  | 2.982 | 262 | 40430 | 7.78  | 47.28 | $3^8T_{2g}$ | 33.84 | $4^8T_{1g}$ | 13.05 | $3^8E_g$    |       |             |  |  |
| 25 $\Gamma_{6g}$                                                                  | 2.983 | 262 | 40503 | 2.33  | 50.70 | $3^8T_{2g}$ | 25.42 | $4^8T_{1g}$ | 11.56 | $5^8T_{1g}$ |       |             |  |  |
| 53 $\Gamma_{8g}$                                                                  | 2.982 | 262 | 40987 | 12.68 | 55.03 | $4^8T_{1g}$ | 30.22 | $3^8T_{2g}$ |       |             |       |             |  |  |
| 26 $\Gamma_{6g}$                                                                  | 2.982 | 262 | 41085 | 3.09  | 29.87 | $3^8T_{2g}$ | 24.87 | $4^8T_{1g}$ | 21.34 | $3^8E_g$    | 12.37 | $4^8T_{2g}$ |  |  |
|                                                                                   |       |     |       |       | 10.44 | $5^8T_{1g}$ |       |             |       |             |       |             |  |  |
| 28 $\Gamma_{7g}$                                                                  | 2.982 | 262 | 41340 | 4.95  | 42.58 | $4^8T_{1g}$ | 38.40 | $3^8T_{2g}$ | 13.96 | $3^8E_g$    |       |             |  |  |
| 54 $\Gamma_{8g}$                                                                  | 2.982 | 261 | 41477 | 3.29  | 29.91 | $3^8T_{2g}$ | 29.27 | $4^8T_{2g}$ | 22.42 | $3^8E_g$    | 11.96 | $4^8T_{1g}$ |  |  |
| 55 $\Gamma_{8g}$                                                                  | 2.982 | 261 | 41746 | 2.18  | 30.19 | $5^8T_{1g}$ | 27.82 | $3^8E_g$    | 13.16 | $4^8T_{2g}$ |       |             |  |  |
| 27 $\Gamma_{6g}$                                                                  | 2.982 | 262 | 41809 | 2.79  | 42.71 | $4^8T_{2g}$ | 34.32 | $4^8T_{1g}$ | 13.92 | $5^8T_{1g}$ |       |             |  |  |
| 56 $\Gamma_{8g}$                                                                  | 2.982 | 261 | 41837 | 2.78  | 30.33 | $5^8T_{1g}$ | 22.43 | $4^8T_{1g}$ | 15.13 | $4^8T_{2g}$ | 13.88 | $3^8T_{2g}$ |  |  |
|                                                                                   |       |     |       |       | 12.57 | $3^8E_g$    |       |             |       |             |       |             |  |  |
| 57 $\Gamma_{8g}$                                                                  | 2.984 | 256 | 42319 | 10.74 | 46.34 | $3^6T_{2g}$ | 15.37 | $5^6T_{1g}$ | 10.73 | $3^6E_g$    |       |             |  |  |
| 29 $\Gamma_{7g}$                                                                  | 2.982 | 262 | 42471 | 8.20  | 68.41 | $4^8T_{1g}$ | 17.74 | $3^8T_{2g}$ |       |             |       |             |  |  |
| 58 $\Gamma_{8g}$                                                                  | 2.982 | 258 | 42507 | 2.67  | 52.23 | $4^8T_{1g}$ | 23.40 | $3^8T_{2g}$ | 17.93 | $5^8T_{1g}$ |       |             |  |  |
| 28 $\Gamma_{6g}$                                                                  | 2.982 | 262 | 42512 | 1.06  | 33.66 | $4^8T_{2g}$ | 28.58 | $5^8T_{1g}$ | 18.88 | $3^8T_{2g}$ | 12.72 | $4^8T_{1g}$ |  |  |
| 30 $\Gamma_{7g}$                                                                  | 2.982 | 261 | 42533 | 0.27  | 29.75 | $4^8T_{2g}$ | 22.71 | $3^8T_{2g}$ | 21.99 | $3^8E_g$    | 20.50 | $5^8T_{1g}$ |  |  |
| 29 $\Gamma_{6g}$                                                                  | 2.983 | 262 | 42774 | 2.33  | 58.57 | $3^8T_{2g}$ | 19.74 | $5^8T_{1g}$ | 12.03 | $4^8T_{1g}$ |       |             |  |  |
| 59 $\Gamma_{8g}$                                                                  | 2.962 | 290 | 42798 | 0.04  | 30.76 | $4^8T_{2g}$ | 19.65 | $3^8E_g$    | 18.39 | $4^8T_{1g}$ | 16.32 | $5^8T_{1g}$ |  |  |
|                                                                                   |       |     |       |       | 13.06 | $3^8T_{2g}$ |       |             |       |             |       |             |  |  |
| 30 $\Gamma_{6g}$                                                                  | 2.982 | 261 | 43064 | 1.14  | 40.70 | $4^8T_{2g}$ | 25.66 | $3^8E_g$    | 13.36 | $4^8T_{1g}$ |       |             |  |  |
| 60 $\Gamma_{8g}$                                                                  | 2.974 | 501 | 43071 | 1.74  | 35.13 | $3^8E_g$    | 30.06 | $4^8T_{2g}$ | 17.18 | $5^8T_{1g}$ |       |             |  |  |
| 61 $\Gamma_{8g}$                                                                  | 2.971 | 449 | 43226 | 7.28  | 41.52 | $4^8T_{1g}$ | 18.22 | $3^8T_{2g}$ | 17.87 | $3^8E_g$    | 11.60 | $4^8T_{2g}$ |  |  |
| 62 $\Gamma_{8g}$                                                                  | 2.982 | 298 | 43549 | 0.45  | 25.79 | $3^6E_g$    | 25.67 | $3^6T_{2g}$ | 18.69 | $5^6T_{1g}$ |       |             |  |  |
| 31 $\Gamma_{7g}$                                                                  | 2.978 | 568 | 43698 | 0.01  | 35.21 | $5^6T_{1g}$ | 24.39 | $3^6E_g$    | 13.90 | $4^6T_{2g}$ | 10.23 | $4^6T_{1g}$ |  |  |
| 63 $\Gamma_{8g}$                                                                  | 2.982 | 291 | 43826 | 6.85  | 31.92 | $3^8T_{2g}$ | 28.93 | $3^8E_g$    | 17.75 | $4^8T_{2g}$ | 14.67 | $5^8T_{1g}$ |  |  |
| 32 $\Gamma_{7g}$                                                                  | 2.959 | 343 | 43883 | 2.29  | 53.70 | $5^8T_{1g}$ | 23.09 | $4^8T_{2g}$ |       |             |       |             |  |  |
| 31 $\Gamma_{6g}$                                                                  | 2.986 | 254 | 44025 | 0.01  | 42.60 | $5^6T_{1g}$ | 26.85 | $3^6T_{2g}$ | 11.85 | $4^6T_{2g}$ |       |             |  |  |
| 64 $\Gamma_{8g}$                                                                  | 2.979 | 198 | 44065 | 0.14  | 25.29 | $4^6T_{2g}$ | 21.85 | $4^6T_{1g}$ | 21.56 | $3^6T_{2g}$ |       |             |  |  |
| 33 $\Gamma_{7g}$                                                                  | 2.967 | 313 | 44108 | 0.01  | 23.42 | $4^6T_{2g}$ | 23.04 | $4^6T_{1g}$ | 19.64 | $5^6T_{1g}$ | 13.70 | $3^6E_g$    |  |  |
| 65 $\Gamma_{8g}$                                                                  | 2.961 | 280 | 44255 | 14.59 | 29.17 | $5^8T_{1g}$ | 26.85 | $4^8T_{1g}$ | 19.20 | $4^8T_{2g}$ | 13.42 | $3^8E_g$    |  |  |
| 34 $\Gamma_{7g}$                                                                  | 2.954 | 374 | 44515 | 0.01  | 60.70 | $4^8T_{2g}$ | 27.42 | $3^8E_g$    |       |             |       |             |  |  |
| 66 $\Gamma_{8g}$                                                                  | 2.975 | 481 | 44567 | 0.02  | 57.55 | $4^8T_{1g}$ | 17.81 | $5^8T_{1g}$ | 11.22 | $4^8T_{2g}$ |       |             |  |  |
| 67 $\Gamma_{8g}$                                                                  | 2.961 | 331 | 44647 | 2.55  | 53.38 | $4^8T_{2g}$ | 26.41 | $5^8T_{1g}$ | 11.53 | $3^8E_g$    |       |             |  |  |
| 32 $\Gamma_{6g}$                                                                  | 2.984 | 252 | 44651 | 5.16  | 69.16 | $4^8T_{1g}$ | 20.80 | $3^8T_{2g}$ |       |             |       |             |  |  |
| 35 $\Gamma_{7g}$                                                                  | 2.959 | 462 | 44723 | 0.05  | 36.40 | $5^6T_{1g}$ | 16.79 | $2^6A_{1g}$ | 14.40 | $4^6T_{1g}$ | 14.19 | $4^6T_{2g}$ |  |  |
| 33 $\Gamma_{6g}$                                                                  | 2.992 | 365 | 44775 | 1.59  | 49.04 | $4^8T_{2g}$ | 40.52 | $5^8T_{1g}$ |       |             |       |             |  |  |
| 68 $\Gamma_{8g}$                                                                  | 2.981 | 306 | 45035 | 4.75  | 46.47 | $5^8T_{1g}$ | 27.59 | $3^8E_g$    | 11.81 | $4^8T_{1g}$ |       |             |  |  |
| 34 $\Gamma_{6g}$                                                                  | 3.000 | 406 | 45185 | 0.38  | 61.87 | $5^8T_{1g}$ | 25.82 | $3^8E_g$    |       |             |       |             |  |  |
| 69 $\Gamma_{8g}$                                                                  | 2.981 | 255 | 45387 | 0.08  | 58.24 | $4^6T_{1g}$ | 10.31 | $3^6T_{2g}$ |       |             |       |             |  |  |
| 70 $\Gamma_{8g}$                                                                  | 2.974 | 365 | 45459 | 0.90  | 26.05 | $4^6T_{1g}$ | 18.32 | $3^6T_{2g}$ | 17.58 | $5^6T_{1g}$ | 12.50 | $2^6A_{1g}$ |  |  |
| 36 $\Gamma_{7g}$                                                                  | 2.956 | 355 | 45707 |       | 77.16 | $5^8T_{1g}$ | 10.48 | $3^8E_g$    |       |             |       |             |  |  |
| 71 $\Gamma_{8g}$                                                                  | 2.979 | 487 | 46016 | 0.01  | 64.38 | $5^8T_{1g}$ | 18.24 | $3^8E_g$    |       |             |       |             |  |  |
| 37 $\Gamma_{7g}$                                                                  | 2.960 | 381 | 46102 |       | 72.45 | $4^8T_{2g}$ | 25.46 | $5^8T_{1g}$ |       |             |       |             |  |  |
| 35 $\Gamma_{6g}$                                                                  | 2.946 | 214 | 46150 | 0.01  | 41.57 | $4^6T_{2g}$ | 36.14 | $3^6E_g$    |       |             |       |             |  |  |
| 72 $\Gamma_{8g}$                                                                  | 2.975 | 447 | 46152 | 0.22  | 29.66 | $3^6E_g$    | 21.21 | $5^6T_{1g}$ | 16.56 | $4^6T_{1g}$ | 14.68 | $3^6T_{2g}$ |  |  |
|                                                                                   |       |     |       |       | 10.58 | $4^6T_{2g}$ |       |             |       |             |       |             |  |  |
| 73 $\Gamma_{8g}$                                                                  | 2.965 | 307 | 46181 | 0.02  | 76.53 | $4^8T_{2g}$ |       |             |       |             |       |             |  |  |
| 36 $\Gamma_{6g}$                                                                  | 2.881 | 738 | 46274 | 0.03  | 39.72 | $4^6T_{2g}$ | 26.48 | $3^6T_{2g}$ | 25.16 | $4^6T_{1g}$ |       |             |  |  |
| 74 $\Gamma_{8g}$                                                                  | 2.964 | 325 | 46340 | 0.12  | 68.56 | $4^8T_{2g}$ | 27.44 | $5^8T_{1g}$ |       |             |       |             |  |  |
| 38 $\Gamma_{7g}$                                                                  | 2.956 | 526 | 46385 |       | 40.48 | $6^6T_{1g}$ | 36.88 | $4^6T_{1g}$ |       |             |       |             |  |  |
| 75 $\Gamma_{8g}$                                                                  | 2.952 | 288 | 46814 |       | 22.12 | $6^6T_{1g}$ | 19.60 | $4^6T_{2g}$ | 19.17 | $4^6T_{1g}$ | 12.70 | $3^6T_{2g}$ |  |  |
|                                                                                   |       |     |       |       | 10.04 | $5^6T_{1g}$ |       |             |       |             |       |             |  |  |
| 39 $\Gamma_{7g}$                                                                  | 2.958 | 375 | 47480 |       | 73.81 | $4^6T_{1g}$ | 14.20 | $5^6T_{1g}$ |       |             |       |             |  |  |
| 76 $\Gamma_{8g}$                                                                  | 2.962 | 297 | 47733 | 0.01  | 40.81 | $4^6T_{1g}$ | 23.27 | $6^6T_{1g}$ | 14.10 | $3^6T_{2g}$ |       |             |  |  |
| 37 $\Gamma_{6g}$                                                                  | 3.006 | 282 | 47762 |       | 30.89 | $4^6T_{1g}$ | 26.09 | $3^6T_{2g}$ | 14.47 | $4^6T_{2g}$ | 11.39 | $5^6T_{1g}$ |  |  |

|                   |       |     |       |      |       |              |       |              |       |              |       |             |
|-------------------|-------|-----|-------|------|-------|--------------|-------|--------------|-------|--------------|-------|-------------|
| 77 $\Gamma_{8g}$  | 2.970 | 243 | 47910 | 0.01 | 41.09 | $4^6T_{1g}$  | 14.80 | $6^6T_{1g}$  | 11.35 | $4^6T_{2g}$  | 10.51 | $5^6T_{1g}$ |
| 40 $\Gamma_{7g}$  | 2.956 | 416 | 47933 |      | 27.23 | $4^6T_{2g}$  | 24.15 | $2^6A_{1g}$  | 16.99 | $5^6T_{1g}$  | 10.60 | $3^6T_{2g}$ |
| 78 $\Gamma_{8g}$  | 2.990 | 330 | 48151 | 0.01 | 31.15 | $4^6T_{2g}$  | 26.95 | $2^6A_{1g}$  | 19.92 | $3^6E_g$     |       |             |
| 38 $\Gamma_{6g}$  | 2.983 | 314 | 48311 |      | 33.96 | $3^6T_{2g}$  | 21.31 | $4^6T_{2g}$  | 17.73 | $3^6E_g$     | 14.62 | $5^6T_{1g}$ |
| 79 $\Gamma_{8g}$  | 2.994 | 283 | 48517 | 0.01 | 31.38 | $4^6T_{2g}$  | 28.53 | $5^6T_{1g}$  | 18.87 | $3^6T_{2g}$  |       |             |
| 41 $\Gamma_{7g}$  | 2.962 | 387 | 48834 |      | 29.58 | $6^6T_{1g}$  | 24.80 | $7^6T_{1g}$  | 12.69 | $5^6T_{1g}$  |       |             |
| 80 $\Gamma_{8g}$  | 2.960 | 341 | 48854 |      | 33.05 | $6^6T_{1g}$  | 19.29 | $6^8T_{1g}$  | 13.42 | $5^8T_{2g}$  |       |             |
| 39 $\Gamma_{6g}$  | 2.994 | 302 | 48921 |      | 50.20 | $6^8T_{1g}$  | 38.67 | $5^8T_{2g}$  |       |              |       |             |
| 81 $\Gamma_{8g}$  | 2.964 | 303 | 48969 | 0.01 | 34.04 | $6^8T_{1g}$  | 23.82 | $5^8T_{2g}$  | 18.75 | $6^6T_{1g}$  |       |             |
| 42 $\Gamma_{7g}$  | 2.970 | 688 | 49049 |      | 50.66 | $5^8T_{2g}$  | 22.24 | $6^8T_{1g}$  |       |              |       |             |
| 82 $\Gamma_{8g}$  | 2.975 | 505 | 49206 |      | 35.57 | $6^6T_{1g}$  | 12.23 | $7^6T_{1g}$  | 11.17 | $3^6T_{2g}$  |       |             |
| 40 $\Gamma_{6g}$  | 2.997 | 327 | 49329 |      | 21.47 | $6^6T_{1g}$  | 17.23 | $5^6T_{2g}$  | 12.62 | $5^6T_{1g}$  | 11.86 | $7^6T_{1g}$ |
|                   |       |     |       |      | 11.81 | $4^6T_{2g}$  |       |              |       |              |       |             |
| 41 $\Gamma_{6g}$  | 2.989 | 347 | 49526 |      | 46.75 | $5^6T_{2g}$  | 19.94 | $4^6E_g$     |       |              |       |             |
| 83 $\Gamma_{8g}$  | 2.981 | 292 | 49539 |      | 63.95 | $6^8T_{1g}$  | 31.97 | $5^8T_{2g}$  |       |              |       |             |
| 43 $\Gamma_{7g}$  | 2.973 | 534 | 49595 |      | 24.34 | $5^6T_{2g}$  | 20.32 | $7^6T_{1g}$  |       |              |       |             |
| 84 $\Gamma_{8g}$  | 2.961 | 301 | 49763 | 0.01 | 43.18 | $5^6T_{2g}$  | 17.93 | $4^6E_g$     |       |              |       |             |
| 44 $\Gamma_{7g}$  | 2.956 | 389 | 49803 |      | 45.69 | $7^6T_{2g}$  | 25.91 | $9^6T_{1g}$  |       |              |       |             |
| 85 $\Gamma_{8g}$  | 2.967 | 298 | 49901 |      | 16.19 | $9^6T_{1g}$  | 15.87 | $7^6T_{1g}$  | 14.80 | $7^6T_{2g}$  |       |             |
| 86 $\Gamma_{8g}$  | 2.967 | 269 | 50107 |      | 21.99 | $9^6T_{1g}$  | 18.59 | $7^6T_{1g}$  | 17.16 | $7^6T_{2g}$  |       |             |
| 45 $\Gamma_{7g}$  | 2.960 | 328 | 50127 |      | 32.83 | $7^6T_{1g}$  | 17.00 | $5^6T_{2g}$  |       |              |       |             |
| 42 $\Gamma_{6g}$  | 2.974 | 373 | 50224 |      | 23.68 | $6^6T_{2g}$  | 17.74 | $7^6T_{1g}$  | 17.40 | $2^6A_{2g}$  | 15.48 | $5^6T_{2g}$ |
| 87 $\Gamma_{8g}$  | 2.982 | 329 | 50231 |      | 26.14 | $5^6T_{2g}$  | 15.10 | $7^6T_{1g}$  | 13.04 | $6^6T_{2g}$  | 12.74 | $2^6A_{2g}$ |
| 43 $\Gamma_{6g}$  | 2.990 | 345 | 50253 |      | 35.40 | $7^6T_{1g}$  | 13.42 | $2^6A_{2g}$  | 10.03 | $4^6T_{1g}$  |       |             |
| 88 $\Gamma_{8g}$  | 2.982 | 346 | 50299 |      | 17.51 | $6^6T_{2g}$  | 16.45 | $8^6T_{1g}$  | 14.89 | $7^6T_{1g}$  | 10.81 | $3^6A_{1g}$ |
| 46 $\Gamma_{7g}$  | 2.950 | 361 | 50365 |      | 27.25 | $6^6T_{2g}$  | 18.26 | $8^6T_{1g}$  | 16.70 | $7^6T_{1g}$  | 10.44 | $5^6T_{2g}$ |
| 44 $\Gamma_{6g}$  | 2.986 | 333 | 50450 |      | 48.74 | $5^8T_{2g}$  | 37.23 | $6^8T_{1g}$  |       |              |       |             |
| 89 $\Gamma_{8g}$  | 2.963 | 239 | 50616 | 0.01 | 48.98 | $6^8T_{1g}$  | 29.02 | $5^8T_{2g}$  |       |              |       |             |
| 47 $\Gamma_{7g}$  | 2.950 | 304 | 50627 |      | 45.72 | $5^8T_{2g}$  | 37.63 | $6^8T_{1g}$  |       |              |       |             |
| 90 $\Gamma_{8g}$  | 2.962 | 258 | 50642 |      | 19.15 | $8^6T_{1g}$  | 17.52 | $7^6T_{1g}$  | 12.59 | $2^6A_{2g}$  | 11.41 | $6^6T_{2g}$ |
| 48 $\Gamma_{7g}$  | 2.947 | 280 | 50793 |      | 37.66 | $10^6T_{1g}$ | 28.32 | $5^6E_g$     |       |              |       |             |
| 91 $\Gamma_{8g}$  | 2.955 | 256 | 50819 |      | 25.53 | $6^6T_{2g}$  | 11.69 | $8^6T_{1g}$  | 10.99 | $5^6T_{2g}$  |       |             |
| 92 $\Gamma_{8g}$  | 2.953 | 265 | 50854 |      | 31.72 | $10^6T_{1g}$ | 23.07 | $5^6E_g$     | 10.24 | $4^6A_{1g}$  |       |             |
| 49 $\Gamma_{7g}$  | 2.954 | 314 | 50909 |      | 32.27 | $8^6T_{1g}$  | 24.72 | $4^6E_g$     |       |              |       |             |
| 93 $\Gamma_{8g}$  | 2.955 | 282 | 50924 |      | 20.21 | $9^6T_{1g}$  | 12.41 | $5^6T_{2g}$  | 11.04 | $6^6T_{2g}$  |       |             |
| 45 $\Gamma_{6g}$  | 2.951 | 235 | 50965 |      | 25.16 | $6^6T_{2g}$  | 17.12 | $8^6T_{1g}$  |       |              |       |             |
| 94 $\Gamma_{8g}$  | 2.954 | 272 | 51008 |      | 25.65 | $9^6T_{1g}$  | 12.89 | $5^6T_{2g}$  | 12.67 | $7^6T_{2g}$  |       |             |
| 95 $\Gamma_{8g}$  | 2.957 | 292 | 51039 |      | 27.20 | $8^6T_{1g}$  | 12.06 | $5^6T_{2g}$  |       |              |       |             |
| 46 $\Gamma_{6g}$  | 2.975 | 666 | 51111 |      | 56.05 | $7^6T_{2g}$  | 10.20 | $10^6T_{1g}$ |       |              |       |             |
| 50 $\Gamma_{7g}$  | 2.957 | 292 | 51125 |      | 20.43 | $11^6T_{1g}$ | 15.64 | $4^6A_{1g}$  | 13.78 | $10^6T_{1g}$ |       |             |
| 96 $\Gamma_{8g}$  | 2.960 | 268 | 51164 |      | 18.64 | $8^6T_{1g}$  | 13.16 | $7^6T_{1g}$  | 12.82 | $4^6E_g$     |       |             |
| 97 $\Gamma_{8g}$  | 2.956 | 274 | 51203 |      | 23.54 | $11^6T_{2g}$ | 11.11 | $10^6T_{2g}$ |       |              |       |             |
| 47 $\Gamma_{6g}$  | 2.975 | 584 | 51263 |      | 21.69 | $8^6T_{2g}$  | 19.11 | $6^6T_{2g}$  |       |              |       |             |
| 51 $\Gamma_{7g}$  | 2.952 | 287 | 51297 |      | 15.88 | $7^6T_{1g}$  | 15.05 | $6^6T_{2g}$  |       |              |       |             |
| 98 $\Gamma_{8g}$  | 2.958 | 256 | 51302 |      | 19.59 | $10^6T_{1g}$ | 15.63 | $5^6E_g$     | 10.19 | $12^6T_{1g}$ |       |             |
| 99 $\Gamma_{8g}$  | 2.975 | 575 | 51419 |      | 22.26 | $8^6T_{2g}$  | 16.43 | $4^6E_g$     |       |              |       |             |
| 48 $\Gamma_{6g}$  | 2.975 | 699 | 51448 |      | 30.28 | $11^6T_{1g}$ | 12.74 | $10^6T_{2g}$ |       |              |       |             |
| 100 $\Gamma_{8g}$ | 2.961 | 256 | 51463 |      | 42.08 | $6^8T_{1g}$  | 17.93 | $5^8T_{2g}$  |       |              |       |             |
| 52 $\Gamma_{7g}$  | 2.946 | 281 | 51472 |      | 16.49 | $7^6T_{1g}$  | 14.06 | $3^6A_{1g}$  | 10.84 | $8^6T_{1g}$  |       |             |
| 49 $\Gamma_{6g}$  | 2.975 | 677 | 51481 |      | 15.93 | $5^6T_{2g}$  |       |              |       |              |       |             |
| 101 $\Gamma_{8g}$ | 2.956 | 268 | 51512 |      | 16.58 | $6^8T_{1g}$  | 12.07 | $11^6T_{2g}$ |       |              |       |             |
| 53 $\Gamma_{7g}$  | 2.954 | 321 | 51532 |      | 27.95 | $3^6T_{2g}$  | 22.60 | $8^6T_{2g}$  | 12.95 | $5^6T_{1g}$  |       |             |
| 102 $\Gamma_{8g}$ | 2.956 | 257 | 51608 |      | 23.70 | $4^6T_{2g}$  | 10.48 | $6^6T_{2g}$  |       |              |       |             |
| 50 $\Gamma_{6g}$  | 2.975 | 653 | 51627 |      | 26.78 | $7^6T_{2g}$  | 10.89 | $10^6T_{1g}$ | 10.82 | $6^6T_{2g}$  |       |             |
| 103 $\Gamma_{8g}$ | 2.955 | 257 | 51661 |      | 24.46 | $9^6T_{1g}$  | 18.59 | $7^6T_{2g}$  |       |              |       |             |
| 51 $\Gamma_{6g}$  | 2.975 | 612 | 51698 |      | 27.27 | $11^6T_{2g}$ | 17.08 | $7^6E_g$     | 10.26 | $12^6T_{2g}$ |       |             |
| 104 $\Gamma_{8g}$ | 2.956 | 240 | 51732 |      | 18.84 | $5^6T_{1g}$  | 17.54 | $3^6T_{2g}$  |       |              |       |             |
| 105 $\Gamma_{8g}$ | 2.954 | 242 | 51758 |      | 10.44 | $7^6T_{1g}$  |       |              |       |              |       |             |
| 52 $\Gamma_{6g}$  | 2.957 | 213 | 51820 | 0.01 | 24.53 | $6^8T_{1g}$  | 10.31 | $5^8T_{2g}$  |       |              |       |             |
| 106 $\Gamma_{8g}$ | 2.954 | 235 | 51832 |      | 66.50 | $5^8T_{2g}$  | 20.74 | $6^8T_{1g}$  |       |              |       |             |
| 54 $\Gamma_{7g}$  | 2.953 | 306 | 51848 |      | 31.00 | $11^6T_{1g}$ | 16.70 | $7^6E_g$     | 11.30 | $11^6T_{2g}$ |       |             |
| 107 $\Gamma_{8g}$ | 2.951 | 250 | 51849 | 0.01 | 12.31 | $12^6T_{1g}$ |       |              |       |              |       |             |



|                   |       |     |       |       |              |       |              |       |              |       |              |  |  |
|-------------------|-------|-----|-------|-------|--------------|-------|--------------|-------|--------------|-------|--------------|--|--|
| 53 $\Gamma_{6g}$  | 2.957 | 207 | 51851 | 15.18 | $7^6T_{2g}$  | 10.65 | $4^6E_g$     | 10.26 | $3^6T_{2g}$  |       |              |  |  |
| 55 $\Gamma_{7g}$  | 2.950 | 344 | 51867 | 23.75 | $8^6T_{1g}$  | 15.22 | $4^6E_g$     | 11.00 | $7^6T_{1g}$  |       |              |  |  |
| 56 $\Gamma_{7g}$  | 2.949 | 366 | 51878 | 33.49 | $12^6T_{1g}$ | 14.01 | $11^6T_{2g}$ |       |              |       |              |  |  |
| 108 $\Gamma_{8g}$ | 2.950 | 267 | 51884 | 12.03 | $6^6T_{2g}$  | 10.00 | $7^6T_{1g}$  |       |              |       |              |  |  |
| 109 $\Gamma_{8g}$ | 2.952 | 265 | 51943 | 18.28 | $9^6T_{2g}$  |       |              |       |              |       |              |  |  |
| 110 $\Gamma_{8g}$ | 2.954 | 263 | 51994 | 13.83 | $9^6T_{2g}$  | 12.04 | $11^6T_{1g}$ |       |              |       |              |  |  |
| 111 $\Gamma_{8g}$ | 2.954 | 267 | 52082 | 11.28 | $8^6T_{2g}$  |       |              |       |              |       |              |  |  |
| 54 $\Gamma_{6g}$  | 2.975 | 813 | 52107 | 13.70 | $6^6E_g$     | 11.51 | $7^6T_{2g}$  | 10.17 | $6^6T_{2g}$  |       |              |  |  |
| 112 $\Gamma_{8g}$ | 2.955 | 263 | 52137 | 23.54 | $12^6T_{1g}$ |       |              |       |              |       |              |  |  |
| 57 $\Gamma_{7g}$  | 2.950 | 298 | 52183 | 25.70 | $12^6T_{1g}$ | 11.07 | $10^6T_{2g}$ |       |              |       |              |  |  |
| 58 $\Gamma_{7g}$  | 2.952 | 306 | 52236 | 31.66 | $9^6T_{1g}$  | 18.53 | $10^6T_{1g}$ |       |              |       |              |  |  |
| 55 $\Gamma_{6g}$  | 2.975 | 787 | 52255 | 25.08 | $10^6T_{1g}$ | 18.00 | $5^6E_g$     | 11.62 | $7^6T_{2g}$  | 10.24 | $10^6T_{2g}$ |  |  |
| 113 $\Gamma_{8g}$ | 2.950 | 250 | 52259 | 11.07 | $11^6T_{2g}$ | 10.36 | $12^6T_{2g}$ |       |              |       |              |  |  |
| 114 $\Gamma_{8g}$ | 2.953 | 257 | 52293 | 10.06 | $8^6T_{1g}$  |       |              |       |              |       |              |  |  |
| 59 $\Gamma_{7g}$  | 2.956 | 310 | 52297 | 19.13 | $14^6T_{1g}$ | 16.06 | $14^6T_{2g}$ |       |              |       |              |  |  |
| 56 $\Gamma_{6g}$  | 2.977 | 819 | 52301 | 14.96 | $12^6T_{2g}$ | 12.56 | $10^6T_{2g}$ |       |              |       |              |  |  |
| 115 $\Gamma_{8g}$ | 2.952 | 243 | 52358 | 11.43 | $7^6T_{2g}$  | 11.32 | $12^6T_{2g}$ |       |              |       |              |  |  |
| 116 $\Gamma_{8g}$ | 2.954 | 260 | 52367 | 17.54 | $8^6T_{2g}$  |       |              |       |              |       |              |  |  |
| 117 $\Gamma_{8g}$ | 2.952 | 265 | 52383 | 16.29 | $9^6T_{2g}$  |       |              |       |              |       |              |  |  |
| 60 $\Gamma_{7g}$  | 2.958 | 309 | 52415 | 19.55 | $11^6T_{1g}$ |       |              |       |              |       |              |  |  |
| 118 $\Gamma_{8g}$ | 2.954 | 254 | 52455 | 10.61 | $7^6T_{2g}$  |       |              |       |              |       |              |  |  |
| 119 $\Gamma_{8g}$ | 2.956 | 269 | 52502 | 11.83 | $13^6T_{2g}$ |       |              |       |              |       |              |  |  |
| 61 $\Gamma_{7g}$  | 2.955 | 315 | 52514 | 14.33 | $14^6T_{1g}$ | 12.66 | $9^6E_g$     |       |              |       |              |  |  |
| 120 $\Gamma_{8g}$ | 2.958 | 267 | 52554 | 19.31 | $5^6T_{1g}$  | 12.56 | $7^6T_{1g}$  |       |              |       |              |  |  |
| 57 $\Gamma_{6g}$  | 2.975 | 611 | 52579 | 28.07 | $9^6T_{2g}$  |       |              |       |              |       |              |  |  |
| 121 $\Gamma_{8g}$ | 2.958 | 256 | 52615 |       |              |       |              |       |              |       |              |  |  |
| 58 $\Gamma_{6g}$  | 2.975 | 576 | 52617 | 28.08 | $8^6T_{2g}$  | 10.43 | $2^6A_{2g}$  |       |              |       |              |  |  |
| 59 $\Gamma_{6g}$  | 2.975 | 717 | 52669 | 13.98 | $13^6T_{1g}$ | 12.30 | $10^6T_{1g}$ | 10.62 | $10^6T_{2g}$ | 10.14 | $8^6E_g$     |  |  |
| 62 $\Gamma_{7g}$  | 2.956 | 271 | 52689 | 16.89 | $9^6T_{1g}$  | 16.22 | $13^6T_{1g}$ | 10.04 | $12^6T_{2g}$ |       |              |  |  |
| 122 $\Gamma_{8g}$ | 2.958 | 239 | 52720 |       |              |       |              |       |              |       |              |  |  |
| 123 $\Gamma_{8g}$ | 2.960 | 245 | 52761 | 29.25 | $6^8T_{1g}$  | 22.44 | $5^8T_{2g}$  |       |              |       |              |  |  |
| 63 $\Gamma_{7g}$  | 2.950 | 261 | 52814 | 20.09 | $6^8T_{1g}$  | 15.60 | $5^8T_{2g}$  |       |              |       |              |  |  |
| 124 $\Gamma_{8g}$ | 2.975 | 562 | 52827 | 11.67 | $12^6T_{2g}$ |       |              |       |              |       |              |  |  |
| 60 $\Gamma_{6g}$  | 2.975 | 777 | 52845 | 12.68 | $9^6T_{2g}$  | 12.37 | $3^6T_{2g}$  | 11.63 | $4^6E_g$     |       |              |  |  |
| 125 $\Gamma_{8g}$ | 2.959 | 244 | 52873 |       |              |       |              |       |              |       |              |  |  |
| 64 $\Gamma_{7g}$  | 2.949 | 242 | 52893 | 26.86 | $6^8T_{1g}$  | 20.79 | $5^8T_{2g}$  |       |              |       |              |  |  |
| 126 $\Gamma_{8g}$ | 2.957 | 236 | 52930 | 10.38 | $12^6T_{1g}$ |       |              |       |              |       |              |  |  |
| 61 $\Gamma_{6g}$  | 2.975 | 740 | 52935 | 18.48 | $6^8T_{1g}$  | 13.14 | $5^8T_{2g}$  |       |              |       |              |  |  |
| 127 $\Gamma_{8g}$ | 2.954 | 251 | 52960 | 12.94 | $5^8T_{2g}$  | 10.66 | $6^6T_{1g}$  |       |              |       |              |  |  |
| 128 $\Gamma_{8g}$ | 2.952 | 256 | 52990 | 47.74 | $5^8T_{2g}$  |       |              |       |              |       |              |  |  |
| 129 $\Gamma_{8g}$ | 2.953 | 263 | 53011 |       |              |       |              |       |              |       |              |  |  |
| 62 $\Gamma_{6g}$  | 2.975 | 810 | 53020 | 35.15 | $6^8T_{1g}$  | 25.88 | $5^8T_{2g}$  |       |              |       |              |  |  |
| 130 $\Gamma_{8g}$ | 2.951 | 263 | 53070 | 11.06 | $13^6T_{1g}$ | 10.42 | $14^6T_{1g}$ |       |              |       |              |  |  |
| 65 $\Gamma_{7g}$  | 2.941 | 196 | 53088 | 58.87 | $6^8T_{1g}$  |       |              |       |              |       |              |  |  |
| 131 $\Gamma_{8g}$ | 2.952 | 273 | 53088 | 10.09 | $7^6T_{2g}$  |       |              |       |              |       |              |  |  |
| 63 $\Gamma_{6g}$  | 2.975 | 731 | 53121 | 20.71 | $11^6T_{2g}$ | 15.95 | $5^6E_g$     |       |              |       |              |  |  |
| 66 $\Gamma_{7g}$  | 2.943 | 203 | 53124 | 18.18 | $6^6T_{1g}$  | 13.36 | $3^6E_g$     |       |              |       |              |  |  |
| 132 $\Gamma_{8g}$ | 2.953 | 268 | 53144 | 11.93 | $16^6T_{1g}$ |       |              |       |              |       |              |  |  |
| 133 $\Gamma_{8g}$ | 2.952 | 262 | 53191 | 14.48 | $14^6T_{1g}$ | 10.20 | $6^6E_g$     |       |              |       |              |  |  |
| 134 $\Gamma_{8g}$ | 2.953 | 277 | 53206 | 25.12 | $14^6T_{1g}$ |       |              |       |              |       |              |  |  |
| 67 $\Gamma_{7g}$  | 2.944 | 188 | 53216 | 17.27 | $12^6T_{1g}$ | 10.03 | $6^6T_{1g}$  |       |              |       |              |  |  |
| 135 $\Gamma_{8g}$ | 2.954 | 275 | 53256 |       |              |       |              |       |              |       |              |  |  |
| 64 $\Gamma_{6g}$  | 2.975 | 684 | 53276 | 10.62 | $11^6T_{2g}$ | 10.38 | $8^6T_{2g}$  |       |              |       |              |  |  |
| 68 $\Gamma_{7g}$  | 2.942 | 171 | 53305 | 14.98 | $12^6T_{1g}$ |       |              |       |              |       |              |  |  |
| 136 $\Gamma_{8g}$ | 2.952 | 272 | 53308 |       |              |       |              |       |              |       |              |  |  |
| 69 $\Gamma_{7g}$  | 2.952 | 220 | 53322 | 19.79 | $9^6T_{1g}$  |       |              |       |              |       |              |  |  |
| 137 $\Gamma_{8g}$ | 2.954 | 281 | 53323 |       |              |       |              |       |              |       |              |  |  |
| 65 $\Gamma_{6g}$  | 2.975 | 654 | 53335 | 15.97 | $14^6T_{2g}$ | 12.83 | $13^6T_{2g}$ | 11.24 | $9^6T_{2g}$  |       |              |  |  |
| 138 $\Gamma_{8g}$ | 2.953 | 288 | 53347 | 12.91 | $7^6T_{2g}$  | 10.04 | $9^6T_{1g}$  |       |              |       |              |  |  |
| 70 $\Gamma_{7g}$  | 2.949 | 217 | 53366 | 25.02 | $16^6T_{1g}$ | 14.84 | $15^6T_{2g}$ | 14.34 | $5^6A_{1g}$  |       |              |  |  |
| 139 $\Gamma_{8g}$ | 2.952 | 291 | 53367 |       |              |       |              |       |              |       |              |  |  |
| 71 $\Gamma_{7g}$  | 2.950 | 251 | 53374 | 17.70 | $11^6T_{1g}$ | 17.16 | $10^6T_{1g}$ | 12.01 | $13^6T_{1g}$ |       |              |  |  |

|                   |       |     |       |       |                 |       |                 |       |                 |
|-------------------|-------|-----|-------|-------|-----------------|-------|-----------------|-------|-----------------|
| 66 $\Gamma_{6g}$  | 2.956 | 207 | 53382 | 13.74 | 15 ${}^6T_{2g}$ | 10.89 | 10 ${}^6E_g$    |       |                 |
| 67 $\Gamma_{6g}$  | 2.954 | 214 | 53430 | 15.16 | 13 ${}^6T_{1g}$ | 11.94 | 5 ${}^6E_g$     | 10.39 | 11 ${}^6T_{2g}$ |
| 68 $\Gamma_{6g}$  | 2.952 | 227 | 53447 | 12.01 | 6 ${}^6T_{1g}$  |       |                 |       |                 |
| 140 $\Gamma_{8g}$ | 2.953 | 277 | 53466 | 14.54 | 9 ${}^6T_{2g}$  |       |                 |       |                 |
| 72 $\Gamma_{7g}$  | 2.947 | 240 | 53497 | 18.28 | 9 ${}^6T_{1g}$  |       |                 |       |                 |
| 69 $\Gamma_{6g}$  | 2.948 | 252 | 53503 |       |                 |       |                 |       |                 |
| 141 $\Gamma_{8g}$ | 2.951 | 279 | 53518 |       |                 |       |                 |       |                 |
| 142 $\Gamma_{8g}$ | 2.950 | 282 | 53555 | 10.95 | 11 ${}^6T_{2g}$ | 10.62 | 16 ${}^6T_{1g}$ |       |                 |
| 143 $\Gamma_{8g}$ | 2.950 | 286 | 53569 | 12.76 | 9 ${}^6E_g$     |       |                 |       |                 |
| 73 $\Gamma_{7g}$  | 2.948 | 232 | 53590 | 10.07 | 6 ${}^6E_g$     |       |                 |       |                 |
| 70 $\Gamma_{6g}$  | 2.948 | 231 | 53615 |       |                 |       |                 |       |                 |
| 144 $\Gamma_{8g}$ | 2.952 | 274 | 53628 | 13.25 | 10 ${}^6T_{2g}$ |       |                 |       |                 |
| 74 $\Gamma_{7g}$  | 2.947 | 243 | 53633 | 14.11 | 6 ${}^6E_g$     |       |                 |       |                 |
| 145 $\Gamma_{8g}$ | 2.950 | 287 | 53634 | 10.65 | 13 ${}^6T_{1g}$ |       |                 |       |                 |
| 71 $\Gamma_{6g}$  | 2.952 | 229 | 53677 |       |                 |       |                 |       |                 |
| 75 $\Gamma_{7g}$  | 2.944 | 245 | 53680 | 31.15 | 9 ${}^6T_{2g}$  | 13.98 | 10 ${}^6T_{2g}$ |       |                 |
| 146 $\Gamma_{8g}$ | 2.951 | 286 | 53680 |       |                 |       |                 |       |                 |
| 147 $\Gamma_{8g}$ | 2.951 | 283 | 53738 | 11.27 | 6 ${}^6E_g$     | 10.27 | 12 ${}^6T_{1g}$ |       |                 |
| 148 $\Gamma_{8g}$ | 2.950 | 284 | 53764 | 10.50 | 10 ${}^6T_{2g}$ |       |                 |       |                 |
| 149 $\Gamma_{8g}$ | 2.952 | 281 | 53801 | 10.54 | 16 ${}^6T_{2g}$ |       |                 |       |                 |
| 72 $\Gamma_{6g}$  | 2.975 | 637 | 53807 | 18.77 | 10 ${}^6T_{2g}$ | 14.59 | 9 ${}^6E_g$     |       |                 |
| 150 $\Gamma_{8g}$ | 2.950 | 287 | 53814 | 15.06 | 15 ${}^6T_{1g}$ | 11.19 | 12 ${}^6T_{1g}$ |       |                 |
| 76 $\Gamma_{7g}$  | 2.947 | 224 | 53833 | 15.58 | 13 ${}^6T_{1g}$ | 13.11 | 14 ${}^6T_{1g}$ |       |                 |
| 151 $\Gamma_{8g}$ | 2.954 | 301 | 53848 | 16.03 | 17 ${}^6T_{2g}$ |       |                 |       |                 |
| 152 $\Gamma_{8g}$ | 2.955 | 313 | 53871 | 11.53 | 12 ${}^6T_{2g}$ | 10.14 | 10 ${}^6T_{1g}$ |       |                 |
| 73 $\Gamma_{6g}$  | 2.955 | 227 | 53871 |       |                 |       |                 |       |                 |
| 153 $\Gamma_{8g}$ | 2.954 | 306 | 53918 | 13.45 | 15 ${}^6T_{1g}$ |       |                 |       |                 |
| 154 $\Gamma_{8g}$ | 2.954 | 303 | 53955 | 57.87 | 6 ${}^8T_{1g}$  | 41.16 | 5 ${}^8T_{2g}$  |       |                 |
| 74 $\Gamma_{6g}$  | 2.975 | 711 | 53984 | 15.72 | 14 ${}^6T_{1g}$ | 11.25 | 6 ${}^6E_g$     | 10.37 | 15 ${}^6T_{2g}$ |
| 155 $\Gamma_{8g}$ | 2.952 | 311 | 53985 |       |                 |       |                 |       |                 |
| 156 $\Gamma_{8g}$ | 2.952 | 316 | 54007 |       |                 |       |                 |       |                 |
| 75 $\Gamma_{6g}$  | 2.975 | 784 | 54117 | 20.02 | 14 ${}^6T_{2g}$ | 19.00 | 13 ${}^6T_{2g}$ | 10.55 | 9 ${}^6E_g$     |
| 157 $\Gamma_{8g}$ | 2.953 | 299 | 54119 | 10.70 | 15 ${}^6T_{1g}$ |       |                 |       |                 |
| 77 $\Gamma_{7g}$  | 2.975 | 797 | 54122 | 12.66 | 13 ${}^6T_{1g}$ | 10.04 | 16 ${}^6T_{1g}$ |       |                 |
| 158 $\Gamma_{8g}$ | 2.953 | 291 | 54173 | 46.91 | 5 ${}^8T_{2g}$  | 18.93 | 6 ${}^8T_{1g}$  |       |                 |
| 78 $\Gamma_{7g}$  | 2.975 | 845 | 54188 |       |                 |       |                 |       |                 |
| 76 $\Gamma_{6g}$  | 2.975 | 679 | 54237 | 15.67 | 15 ${}^6T_{2g}$ |       |                 |       |                 |
| 159 $\Gamma_{8g}$ | 2.951 | 283 | 54255 | 13.31 | 14 ${}^6T_{2g}$ | 10.39 | 13 ${}^6T_{1g}$ |       |                 |
| 79 $\Gamma_{7g}$  | 2.975 | 753 | 54284 | 23.07 | 13 ${}^6T_{1g}$ | 13.81 | 5 ${}^6E_g$     | 10.44 | 9 ${}^6T_{1g}$  |
| 160 $\Gamma_{8g}$ | 2.950 | 284 | 54304 | 16.86 | 9 ${}^6T_{1g}$  |       |                 |       |                 |
| 161 $\Gamma_{8g}$ | 2.951 | 299 | 54308 | 15.36 | 10 ${}^6T_{1g}$ |       |                 |       |                 |
| 77 $\Gamma_{6g}$  | 2.975 | 643 | 54309 | 50.58 | 6 ${}^8T_{1g}$  | 45.81 | 5 ${}^8T_{2g}$  |       |                 |
| 162 $\Gamma_{8g}$ | 2.950 | 300 | 54323 | 16.47 | 7 ${}^6T_{2g}$  | 14.85 | 9 ${}^6T_{1g}$  |       |                 |
| 163 $\Gamma_{8g}$ | 2.953 | 300 | 54385 | 18.92 | 11 ${}^6T_{1g}$ | 11.94 | 11 ${}^6T_{2g}$ | 10.26 | 7 ${}^6E_g$     |
| 78 $\Gamma_{6g}$  | 2.975 | 706 | 54391 | 22.77 | 9 ${}^6E_g$     | 10.96 | 4 ${}^6A_{2g}$  |       |                 |
| 80 $\Gamma_{7g}$  | 2.949 | 211 | 54419 | 36.83 | 5 ${}^8T_{2g}$  | 20.92 | 6 ${}^8T_{1g}$  |       |                 |
| 164 $\Gamma_{8g}$ | 2.952 | 298 | 54431 | 13.89 | 10 ${}^6E_g$    |       |                 |       |                 |
| 79 $\Gamma_{6g}$  | 2.975 | 616 | 54440 | 19.12 | 14 ${}^6T_{2g}$ |       |                 |       |                 |
| 165 $\Gamma_{8g}$ | 2.950 | 291 | 54477 | 17.88 | 11 ${}^6T_{2g}$ | 15.48 | 12 ${}^6T_{1g}$ | 13.52 | 10 ${}^6T_{2g}$ |
| 81 $\Gamma_{7g}$  | 2.942 | 224 | 54477 | 13.35 | 15 ${}^6T_{1g}$ | 10.09 | 5 ${}^8T_{2g}$  |       |                 |
| 166 $\Gamma_{8g}$ | 2.950 | 288 | 54507 |       |                 |       |                 |       |                 |
| 80 $\Gamma_{6g}$  | 2.975 | 665 | 54541 | 50.80 | 5 ${}^8T_{2g}$  | 14.97 | 6 ${}^8T_{1g}$  |       |                 |
| 167 $\Gamma_{8g}$ | 2.953 | 297 | 54554 | 31.40 | 16 ${}^6T_{2g}$ | 16.68 | 17 ${}^6T_{2g}$ |       |                 |
| 168 $\Gamma_{8g}$ | 2.954 | 313 | 54573 | 18.16 | 16 ${}^6T_{1g}$ | 10.60 | 17 ${}^6T_{2g}$ |       |                 |
| 82 $\Gamma_{7g}$  | 2.947 | 215 | 54578 | 15.14 | 14 ${}^6T_{1g}$ | 13.42 | 17 ${}^6T_{2g}$ |       |                 |
| 169 $\Gamma_{8g}$ | 2.954 | 293 | 54676 | 13.50 | 14 ${}^6T_{2g}$ |       |                 |       |                 |
| 170 $\Gamma_{8g}$ | 2.955 | 322 | 54704 | 10.64 | 12 ${}^6T_{2g}$ |       |                 |       |                 |
| 81 $\Gamma_{6g}$  | 2.975 | 775 | 54710 | 39.99 | 9 ${}^6T_{1g}$  | 21.47 | 7 ${}^6T_{2g}$  |       |                 |
| 83 $\Gamma_{7g}$  | 2.941 | 197 | 54711 | 15.62 | 10 ${}^6T_{1g}$ | 11.37 | 13 ${}^6T_{1g}$ | 11.33 | 7 ${}^6E_g$     |
| 171 $\Gamma_{8g}$ | 2.955 | 321 | 54734 | 15.83 | 12 ${}^6T_{2g}$ |       |                 | 10.49 | 5 ${}^6E_g$     |
| 82 $\Gamma_{6g}$  | 2.975 | 867 | 54842 | 14.01 | 12 ${}^6T_{2g}$ | 12.57 | 8 ${}^6E_g$     | 10.80 | 13 ${}^6T_{2g}$ |
| 84 $\Gamma_{7g}$  | 2.950 | 206 | 54858 | 14.47 | 10 ${}^6E_g$    | 12.21 | 16 ${}^6T_{2g}$ | 10.99 | 15 ${}^6T_{1g}$ |



|     |               |       |     |       |       |              |       |              |       |              |       |              |  |
|-----|---------------|-------|-----|-------|-------|--------------|-------|--------------|-------|--------------|-------|--------------|--|
| 99  | $\Gamma_{6g}$ | 2.976 | 704 | 57598 | 23.61 | $20^6T_{2g}$ | 14.94 | $18^6T_{2g}$ | 13.72 | $19^6T_{2g}$ |       |              |  |
| 101 | $\Gamma_{7g}$ | 2.951 | 330 | 57629 | 17.79 | $18^6T_{1g}$ | 12.20 | $20^6T_{2g}$ | 11.51 | $12^6E_g$    | 10.74 | $13^6E_g$    |  |
| 200 | $\Gamma_{8g}$ | 2.955 | 302 | 57656 | 19.89 | $19^6T_{1g}$ | 18.64 | $20^6T_{2g}$ | 11.63 | $13^6E_g$    |       |              |  |
| 100 | $\Gamma_{6g}$ | 2.975 | 700 | 57710 | 31.77 | $19^6T_{2g}$ | 15.34 | $20^6T_{2g}$ |       |              |       |              |  |
| 201 | $\Gamma_{8g}$ | 2.956 | 291 | 57720 | 22.32 | $19^6T_{2g}$ | 14.94 | $18^6T_{2g}$ | 12.37 | $19^6T_{1g}$ |       |              |  |
| 202 | $\Gamma_{8g}$ | 2.954 | 304 | 57823 | 17.04 | $19^6T_{2g}$ | 13.31 | $19^6T_{1g}$ | 10.29 | $18^6T_{1g}$ |       |              |  |
| 102 | $\Gamma_{7g}$ | 2.951 | 311 | 57919 | 21.13 | $19^6T_{1g}$ | 15.24 | $13^6E_g$    | 15.17 | $21^6T_{2g}$ | 11.05 | $20^6T_{1g}$ |  |
|     |               |       |     |       | 10.40 | $20^6T_{2g}$ |       |              |       |              |       |              |  |
| 203 | $\Gamma_{8g}$ | 2.957 | 298 | 57929 | 19.44 | $12^6E_g$    | 10.60 | $20^6T_{2g}$ |       |              |       |              |  |
| 103 | $\Gamma_{7g}$ | 2.956 | 365 | 57932 | 32.20 | $18^6T_{1g}$ |       |              |       |              |       |              |  |
| 101 | $\Gamma_{6g}$ | 2.952 | 263 | 57946 | 49.06 | $17^6T_{1g}$ |       |              |       |              |       |              |  |
| 204 | $\Gamma_{8g}$ | 2.957 | 319 | 57995 | 49.58 | $20^6T_{2g}$ | 14.51 | $13^6E_g$    |       |              |       |              |  |
| 205 | $\Gamma_{8g}$ | 2.957 | 328 | 58029 | 20.82 | $19^6T_{1g}$ | 14.74 | $20^6T_{2g}$ | 10.54 | $21^6T_{2g}$ | 10.41 | $13^6E_g$    |  |
| 206 | $\Gamma_{8g}$ | 2.957 | 346 | 58047 | 20.67 | $13^6E_g$    | 15.53 | $18^6T_{1g}$ | 11.11 | $19^6T_{2g}$ |       |              |  |
| 104 | $\Gamma_{7g}$ | 2.954 | 395 | 58074 | 23.50 | $19^6T_{1g}$ | 18.98 | $21^6T_{2g}$ | 10.19 | $20^6T_{1g}$ |       |              |  |
| 102 | $\Gamma_{6g}$ | 2.958 | 237 | 58131 | 41.19 | $12^6E_g$    | 10.59 | $18^6T_{2g}$ |       |              |       |              |  |
| 207 | $\Gamma_{8g}$ | 2.955 | 347 | 58146 | 21.62 | $18^6T_{1g}$ | 14.18 | $21^6T_{2g}$ | 12.62 | $19^6T_{2g}$ |       |              |  |
| 103 | $\Gamma_{6g}$ | 2.954 | 303 | 58183 | 16.92 | $20^6T_{2g}$ | 15.86 | $21^6T_{2g}$ |       |              |       |              |  |
| 105 | $\Gamma_{7g}$ | 2.955 | 396 | 58249 | 54.72 | $19^6T_{1g}$ | 14.16 | $12^6E_g$    | 10.87 | $18^6T_{1g}$ |       |              |  |
| 208 | $\Gamma_{8g}$ | 2.956 | 340 | 58276 | 17.29 | $18^6T_{1g}$ | 15.35 | $21^6T_{2g}$ | 14.07 | $13^6E_g$    |       |              |  |
| 106 | $\Gamma_{7g}$ | 2.951 | 456 | 58328 | 32.27 | $21^6T_{2g}$ | 20.28 | $20^6T_{2g}$ | 15.77 | $18^6T_{1g}$ | 10.15 | $20^6T_{1g}$ |  |
| 209 | $\Gamma_{8g}$ | 2.956 | 345 | 58363 | 36.16 | $19^6T_{1g}$ | 12.65 | $18^6T_{1g}$ | 10.08 | $20^6T_{1g}$ | 10.02 | $21^6T_{2g}$ |  |
| 104 | $\Gamma_{6g}$ | 2.955 | 281 | 58375 | 19.38 | $18^6T_{1g}$ | 17.46 | $19^6T_{2g}$ | 15.80 | $6^6A_{2g}$  |       |              |  |
| 210 | $\Gamma_{8g}$ | 2.955 | 337 | 58498 | 25.05 | $19^6T_{1g}$ | 16.90 | $20^6T_{1g}$ | 11.23 | $6^6A_{2g}$  | 10.55 | $12^6E_g$    |  |
| 105 | $\Gamma_{6g}$ | 2.953 | 295 | 58524 | 51.37 | $19^6T_{1g}$ | 17.11 | $18^6T_{1g}$ |       |              |       |              |  |
| 211 | $\Gamma_{8g}$ | 2.953 | 333 | 58622 | 19.24 | $19^6T_{1g}$ | 15.75 | $20^6T_{1g}$ | 15.26 | $18^6T_{1g}$ |       |              |  |
| 212 | $\Gamma_{8g}$ | 2.954 | 347 | 58708 | 27.01 | $20^6T_{1g}$ | 20.41 | $19^6T_{1g}$ | 18.21 | $18^6T_{1g}$ | 10.76 | $21^6T_{2g}$ |  |
| 106 | $\Gamma_{6g}$ | 2.958 | 268 | 58790 | 24.13 | $21^6T_{2g}$ | 21.96 | $13^6E_g$    |       |              |       |              |  |
| 107 | $\Gamma_{6g}$ | 2.955 | 325 | 58829 | 41.84 | $20^6T_{1g}$ | 33.20 | $21^6T_{2g}$ |       |              |       |              |  |
| 213 | $\Gamma_{8g}$ | 2.953 | 338 | 58834 | 31.38 | $20^6T_{1g}$ | 18.44 | $21^6T_{2g}$ | 11.08 | $18^6T_{1g}$ |       |              |  |
| 214 | $\Gamma_{8g}$ | 2.952 | 352 | 58893 | 47.27 | $20^6T_{1g}$ | 12.95 | $20^6T_{2g}$ |       |              |       |              |  |
| 108 | $\Gamma_{6g}$ | 2.952 | 349 | 58942 | 34.37 | $6^6A_{2g}$  | 14.24 | $21^6T_{2g}$ | 11.56 | $20^6T_{2g}$ | 11.29 | $20^6T_{1g}$ |  |
| 215 | $\Gamma_{8g}$ | 2.954 | 347 | 59006 | 36.89 | $20^6T_{1g}$ | 18.19 | $21^6T_{2g}$ | 11.97 | $13^6E_g$    |       |              |  |
| 109 | $\Gamma_{6g}$ | 2.954 | 376 | 59015 | 32.50 | $21^6T_{2g}$ | 19.33 | $20^6T_{2g}$ | 14.06 | $13^6E_g$    |       |              |  |
| 110 | $\Gamma_{6g}$ | 2.959 | 483 | 59039 | 52.25 | $21^6T_{1g}$ | 26.80 | $22^6T_{2g}$ |       |              |       |              |  |
| 216 | $\Gamma_{8g}$ | 2.953 | 354 | 59105 | 28.63 | $21^6T_{2g}$ | 21.25 | $20^6T_{1g}$ | 16.64 | $6^6A_{2g}$  |       |              |  |
| 107 | $\Gamma_{7g}$ | 2.954 | 327 | 59108 | 54.71 | $20^6T_{1g}$ |       |              |       |              |       |              |  |
| 108 | $\Gamma_{7g}$ | 2.955 | 338 | 59149 | 50.30 | $20^6T_{1g}$ | 20.14 | $13^6E_g$    |       |              |       |              |  |
| 217 | $\Gamma_{8g}$ | 2.955 | 361 | 59167 | 69.72 | $21^6T_{2g}$ |       |              |       |              |       |              |  |
| 218 | $\Gamma_{8g}$ | 2.957 | 465 | 59287 | 44.77 | $22^6T_{2g}$ | 35.24 | $21^6T_{1g}$ |       |              |       |              |  |
| 219 | $\Gamma_{8g}$ | 2.959 | 497 | 59432 | 33.90 | $22^6T_{2g}$ | 23.95 | $21^6T_{1g}$ | 20.87 | $7^6A_{2g}$  |       |              |  |
| 111 | $\Gamma_{6g}$ | 2.961 | 507 | 59472 | 63.38 | $7^6A_{2g}$  | 14.46 | $20^6T_{2g}$ |       |              |       |              |  |
| 109 | $\Gamma_{7g}$ | 2.960 | 491 | 59493 | 68.66 | $21^6T_{1g}$ |       |              |       |              |       |              |  |
| 220 | $\Gamma_{8g}$ | 2.960 | 511 | 59507 | 58.09 | $7^6A_{2g}$  | 13.84 | $20^6T_{2g}$ | 11.59 | $22^6T_{2g}$ |       |              |  |
| 110 | $\Gamma_{7g}$ | 2.959 | 527 | 59593 | 69.19 | $21^6T_{1g}$ |       |              |       |              |       |              |  |
| 221 | $\Gamma_{8g}$ | 2.960 | 520 | 59612 | 62.76 | $21^6T_{1g}$ | 15.73 | $22^6T_{2g}$ |       |              |       |              |  |
| 222 | $\Gamma_{8g}$ | 2.961 | 496 | 59875 | 63.67 | $21^6T_{1g}$ | 21.11 | $22^6T_{2g}$ |       |              |       |              |  |
| 111 | $\Gamma_{7g}$ | 2.961 | 518 | 59887 | 74.46 | $22^6T_{2g}$ | 23.11 | $21^6T_{1g}$ |       |              |       |              |  |
| 112 | $\Gamma_{6g}$ | 2.962 | 510 | 59936 | 54.62 | $22^6T_{2g}$ | 23.82 | $21^6T_{1g}$ |       |              |       |              |  |
| 223 | $\Gamma_{8g}$ | 2.961 | 507 | 59960 | 43.92 | $22^6T_{2g}$ | 37.61 | $21^6T_{1g}$ |       |              |       |              |  |
| 224 | $\Gamma_{8g}$ | 2.961 | 518 | 59976 | 69.80 | $22^6T_{2g}$ | 18.47 | $21^6T_{1g}$ |       |              |       |              |  |
| 113 | $\Gamma_{6g}$ | 2.961 | 522 | 60005 | 78.08 | $22^6T_{2g}$ |       |              |       |              |       |              |  |

 $4f^7$  excited states $4f^7(^6P_{3/2,5/2,7/2})^c$ 

|   |               |       |     |       |       |             |       |             |  |  |  |  |  |
|---|---------------|-------|-----|-------|-------|-------------|-------|-------------|--|--|--|--|--|
| 2 | $\Gamma_{7u}$ | 2.969 | 267 | 30115 | 89.46 | $1^6T_{1u}$ |       |             |  |  |  |  |  |
| 2 | $\Gamma_{8u}$ | 2.969 | 267 | 30140 | 89.86 | $1^6T_{1u}$ |       |             |  |  |  |  |  |
| 3 | $\Gamma_{8u}$ | 2.969 | 267 | 30502 | 94.04 | $1^6T_{1u}$ |       |             |  |  |  |  |  |
| 2 | $\Gamma_{6u}$ | 2.969 | 267 | 30767 | 85.40 | $1^6T_{1u}$ | 11.97 | $3^6T_{2u}$ |  |  |  |  |  |
| 4 | $\Gamma_{8u}$ | 2.969 | 267 | 30783 | 85.64 | $1^6T_{1u}$ |       |             |  |  |  |  |  |
| 3 | $\Gamma_{7u}$ | 2.969 | 267 | 30807 | 85.97 | $1^6T_{1u}$ | 10.31 | $2^6E_u$    |  |  |  |  |  |



|                                      |       |     |       |       |             |       |             |       |             |       |             |  |  |
|--------------------------------------|-------|-----|-------|-------|-------------|-------|-------------|-------|-------------|-------|-------------|--|--|
| 5 $T_{2g}$                           | 2.799 | 286 | 5407  | 52.28 | 1 $7T_{1g}$ | 43.48 | 1 $7T_{2g}$ |       |             |       |             |  |  |
| 2 $A_{2g}$                           | 2.799 | 285 | 5457  | 54.22 | 1 $7T_{2g}$ | 42.46 | 1 $7T_{1g}$ |       |             |       |             |  |  |
| 6 $T_{2g}$                           | 2.800 | 289 | 5619  | 45.05 | 1 $7T_{2g}$ | 33.67 | 1 $7A_{2g}$ | 17.99 | 1 $7T_{1g}$ |       |             |  |  |
| 6 $T_{1g}$                           | 2.800 | 289 | 5650  | 47.57 | 1 $7T_{2g}$ | 34.76 | 1 $7A_{2g}$ | 14.36 | 1 $7T_{1g}$ |       |             |  |  |
| 3 $A_{1g}$                           | 2.800 | 290 | 5676  | 48.77 | 1 $7T_{2g}$ | 36.45 | 1 $7A_{2g}$ | 11.47 | 1 $7T_{1g}$ |       |             |  |  |
| $4f^6(^5D_{0-3})$                    |       |     |       |       |             |       |             |       |             |       |             |  |  |
| 4 $A_{1g}$                           | 2.798 | 285 | 19973 | 57.46 | 1 $5T_{2g}$ | 36.83 | 1 $5E_g$    |       |             |       |             |  |  |
| 7 $T_{1g}$                           | 2.798 | 285 | 20781 | 58.04 | 1 $5T_{2g}$ | 36.80 | 1 $5E_g$    |       |             |       |             |  |  |
| 7 $T_{2g}$                           | 2.797 | 285 | 22428 | 70.36 | 1 $5T_{2g}$ | 25.21 | 1 $5E_g$    |       |             |       |             |  |  |
| 5 $E_g$                              | 2.798 | 284 | 22521 | 54.04 | 1 $5E_g$    | 41.47 | 1 $5T_{2g}$ |       |             |       |             |  |  |
| 8 $T_{1g}$                           | 2.797 | 285 | 25111 | 85.65 | 1 $5T_{2g}$ | 10.04 | 1 $5E_g$    |       |             |       |             |  |  |
| 8 $T_{2g}$                           | 2.797 | 285 | 25153 | 49.90 | 1 $5E_g$    | 45.77 | 1 $5T_{2g}$ |       |             |       |             |  |  |
| 3 $A_{2g}$                           | 2.797 | 284 | 25190 | 95.44 | 1 $5E_g$    |       |             |       |             |       |             |  |  |
| $4f^6(^5D_4, ^5L_{6-10}, ^5G_{2-6})$ |       |     |       |       |             |       |             |       |             |       |             |  |  |
| 9 $T_{2g}$                           | 2.797 | 285 | 28323 | 21.94 | 1 $5T_{1g}$ | 20.69 | 2 $5E_g$    | 16.46 | 4 $5T_{2g}$ | 14.24 | 2 $5T_{1g}$ |  |  |
| 5 $A_{1g}$                           | 2.797 | 284 | 28343 | 51.00 | 3 $5T_{2g}$ | 34.25 | 3 $5E_g$    | 11.53 | 4 $5T_{2g}$ |       |             |  |  |
| 4 $A_{2g}$                           | 2.797 | 285 | 28345 | 36.80 | 1 $5T_{1g}$ | 35.07 | 2 $5E_g$    | 14.96 | 2 $5T_{1g}$ |       |             |  |  |
| 9 $T_{1g}$                           | 2.797 | 284 | 28362 | 31.55 | 3 $5T_{2g}$ | 14.41 | 3 $5E_g$    | 13.19 | 2 $5T_{1g}$ | 11.83 | 1 $5T_{1g}$ |  |  |
|                                      |       |     |       | 10.75 | 4 $5T_{2g}$ |       |             |       |             |       |             |  |  |
| 10 $T_{2g}$                          | 2.797 | 284 | 28494 | 43.66 | 1 $5T_{1g}$ | 16.42 | 2 $5E_g$    | 10.07 | 4 $5T_{1g}$ |       |             |  |  |
| 11 $T_{2g}$                          | 2.797 | 285 | 28495 | 42.72 | 1 $5T_{1g}$ | 25.53 | 1 $5A_{1g}$ |       |             |       |             |  |  |
| 6 $E_g$                              | 2.797 | 285 | 28536 | 45.16 | 1 $5T_{1g}$ | 22.35 | 1 $5A_{1g}$ | 18.14 | 2 $5E_g$    |       |             |  |  |
| 12 $T_{2g}$                          | 2.797 | 285 | 28572 | 32.46 | 4 $5T_{2g}$ | 15.97 | 1 $5T_{1g}$ | 14.79 | 2 $5E_g$    |       |             |  |  |
| 10 $T_{1g}$                          | 2.797 | 285 | 28618 | 43.04 | 1 $5T_{1g}$ | 23.45 | 2 $5T_{2g}$ |       |             |       |             |  |  |
| 7 $E_g$                              | 2.797 | 284 | 28625 | 21.65 | 3 $5T_{2g}$ | 17.24 | 3 $5T_{1g}$ | 16.86 | 2 $5T_{1g}$ | 13.51 | 4 $5E_g$    |  |  |
|                                      |       |     |       | 13.26 | 4 $5T_{2g}$ |       |             |       |             |       |             |  |  |
| 13 $T_{2g}$                          | 2.797 | 283 | 28629 | 22.30 | 3 $5T_{2g}$ | 17.04 | 2 $5T_{1g}$ | 16.91 | 3 $5T_{1g}$ | 13.25 | 4 $5E_g$    |  |  |
|                                      |       |     |       | 12.24 | 4 $5T_{2g}$ |       |             |       |             |       |             |  |  |
| 6 $A_{1g}$                           | 2.797 | 281 | 28703 | 61.44 | 2 $5E_g$    | 14.13 | 2 $5T_{2g}$ | 13.04 | 5 $5T_{2g}$ |       |             |  |  |
| 8 $E_g$                              | 2.798 | 284 | 28706 | 32.23 | 3 $5T_{1g}$ | 17.07 | 4 $5T_{2g}$ | 17.02 | 4 $5E_g$    | 11.43 | 2 $5A_{1g}$ |  |  |
| 5 $A_{2g}$                           | 2.798 | 284 | 28715 | 42.37 | 2 $5T_{1g}$ | 20.16 | 4 $5E_g$    | 11.33 | 2 $5E_g$    | 10.61 | 3 $5E_g$    |  |  |
| 14 $T_{2g}$                          | 2.798 | 284 | 28825 | 75.92 | 2 $5T_{2g}$ |       |             |       |             |       |             |  |  |
| 11 $T_{1g}$                          | 2.797 | 285 | 28934 | 19.48 | 3 $5T_{2g}$ | 19.11 | 2 $5T_{1g}$ | 11.08 | 1 $5E_g$    | 10.83 | 1 $5T_{2g}$ |  |  |
| 7 $A_{1g}$                           | 2.797 | 284 | 28954 | 55.22 | 1 $5E_g$    | 35.33 | 1 $5T_{2g}$ |       |             |       |             |  |  |
| 9 $E_g$                              | 2.797 | 284 | 29001 | 29.36 | 3 $5E_g$    | 17.87 | 2 $5T_{2g}$ | 12.75 | 2 $5T_{1g}$ | 11.80 | 4 $5T_{2g}$ |  |  |
| 12 $T_{1g}$                          | 2.797 | 285 | 29015 | 30.02 | 1 $5E_g$    | 29.87 | 1 $5T_{2g}$ | 12.65 | 2 $5T_{2g}$ |       |             |  |  |
| 15 $T_{2g}$                          | 2.797 | 284 | 29029 | 28.53 | 3 $5T_{2g}$ | 14.21 | 2 $5T_{1g}$ | 12.61 | 4 $5T_{2g}$ | 11.17 | 4 $5E_g$    |  |  |
| 10 $E_g$                             | 2.797 | 284 | 29066 | 38.73 | 1 $5T_{2g}$ | 29.03 | 1 $5E_g$    | 12.20 | 2 $5E_g$    |       |             |  |  |
| 16 $T_{2g}$                          | 2.798 | 285 | 29110 | 51.85 | 1 $5T_{2g}$ | 13.39 | 1 $5E_g$    | 11.34 | 2 $5T_{2g}$ |       |             |  |  |
| 17 $T_{2g}$                          | 2.797 | 285 | 29122 | 33.57 | 2 $5E_g$    | 22.85 | 1 $5T_{1g}$ | 10.95 | 2 $5T_{2g}$ | 10.05 | 5 $5T_{2g}$ |  |  |
| 18 $T_{2g}$                          | 2.797 | 285 | 29131 | 21.75 | 1 $5T_{1g}$ | 20.33 | 1 $5A_{1g}$ | 15.08 | 2 $5T_{2g}$ |       |             |  |  |
| 13 $T_{1g}$                          | 2.797 | 283 | 29188 | 25.95 | 4 $5T_{2g}$ | 23.24 | 4 $5E_g$    | 19.51 | 3 $5T_{1g}$ |       |             |  |  |
| 6 $A_{2g}$                           | 2.797 | 285 | 29207 | 44.48 | 3 $5T_{1g}$ | 23.59 | 3 $5E_g$    | 22.51 | 4 $5E_g$    |       |             |  |  |
| 11 $E_g$                             | 2.797 | 284 | 29226 | 46.55 | 2 $5T_{2g}$ | 12.68 | 3 $5E_g$    |       |             |       |             |  |  |
| 14 $T_{1g}$                          | 2.798 | 285 | 29239 | 39.81 | 2 $5T_{2g}$ | 11.93 | 1 $5T_{1g}$ |       |             |       |             |  |  |
| 19 $T_{2g}$                          | 2.798 | 284 | 29250 | 29.67 | 3 $5T_{1g}$ | 19.79 | 2 $5A_{1g}$ | 19.09 | 2 $5T_{1g}$ | 10.73 | 3 $5E_g$    |  |  |
| 12 $E_g$                             | 2.797 | 285 | 29690 | 55.48 | 3 $5T_{2g}$ | 18.63 | 2 $5T_{1g}$ | 11.21 | 4 $5T_{2g}$ |       |             |  |  |
| 20 $T_{2g}$                          | 2.797 | 285 | 29716 | 30.57 | 2 $5T_{1g}$ | 29.09 | 3 $5E_g$    | 13.62 | 4 $5T_{2g}$ |       |             |  |  |
| 15 $T_{1g}$                          | 2.797 | 284 | 29792 | 25.37 | 3 $5T_{2g}$ | 21.47 | 4 $5T_{2g}$ | 13.16 | 2 $5T_{1g}$ | 12.96 | 3 $5E_g$    |  |  |
|                                      |       |     |       | 12.61 | 4 $5E_g$    |       |             |       |             |       |             |  |  |
| 21 $T_{2g}$                          | 2.797 | 285 | 29886 | 37.77 | 3 $5T_{1g}$ | 13.78 | 4 $5T_{2g}$ | 12.81 | 4 $5E_g$    | 10.21 | 3 $5T_{2g}$ |  |  |
| 16 $T_{1g}$                          | 2.798 | 284 | 29907 | 45.98 | 3 $5T_{1g}$ | 25.36 | 2 $5T_{1g}$ | 17.30 | 4 $5T_{2g}$ |       |             |  |  |
| 8 $A_{1g}$                           | 2.797 | 285 | 29956 | 55.57 | 4 $5E_g$    | 21.20 | 4 $5T_{2g}$ | 16.77 | 3 $5T_{2g}$ |       |             |  |  |
| 13 $E_g$                             | 2.797 | 283 | 30010 | 20.58 | 1 $5T_{1g}$ | 15.63 | 2 $5A_{1g}$ | 12.25 | 4 $5E_g$    |       |             |  |  |
| 22 $T_{2g}$                          | 2.797 | 284 | 30049 | 14.01 | 1 $5T_{1g}$ | 13.06 | 2 $5A_{1g}$ | 12.20 | 1 $5A_{1g}$ | 11.63 | 2 $5T_{1g}$ |  |  |
| 14 $E_g$                             | 2.797 | 285 | 30050 | 35.89 | 1 $5T_{1g}$ | 23.50 | 2 $5E_g$    | 13.78 | 1 $5A_{1g}$ |       |             |  |  |
| 7 $A_{2g}$                           | 2.797 | 285 | 30087 | 38.07 | 1 $5T_{1g}$ | 35.69 | 2 $5E_g$    | 12.27 | 4 $5T_{1g}$ |       |             |  |  |
| 9 $A_{1g}$                           | 2.797 | 284 | 30209 | 59.14 | 2 $5T_{2g}$ | 15.13 | 5 $5E_g$    | 14.91 | 2 $5E_g$    |       |             |  |  |
| 17 $T_{1g}$                          | 2.797 | 285 | 30209 | 53.06 | 2 $5T_{2g}$ |       |             |       |             |       |             |  |  |
| 23 $T_{2g}$                          | 2.798 | 284 | 30233 | 46.73 | 2 $5T_{2g}$ | 12.48 | 1 $5T_{1g}$ | 12.34 | 5 $5T_{1g}$ |       |             |  |  |
| 8 $A_{2g}$                           | 2.797 | 285 | 30652 | 42.03 | 3 $5T_{2g}$ | 24.71 | 4 $5T_{2g}$ | 22.18 | 2 $5T_{1g}$ |       |             |  |  |

|    |          |       |     |       |       |   |           |       |   |           |       |   |           |       |   |           |
|----|----------|-------|-----|-------|-------|---|-----------|-------|---|-----------|-------|---|-----------|-------|---|-----------|
| 18 | $T_{1g}$ | 2.797 | 285 | 30653 | 42.08 | 3 | $5T_{2g}$ | 24.69 | 4 | $5T_{2g}$ | 22.13 | 2 | $5T_{1g}$ |       |   |           |
| 24 | $T_{2g}$ | 2.797 | 285 | 30656 | 28.86 | 2 | $5T_{1g}$ | 27.16 | 3 | $5T_{2g}$ | 22.27 | 4 | $5T_{2g}$ | 10.84 | 3 | $5E_g$    |
| 10 | $A_{1g}$ | 2.797 | 284 | 30738 | 32.22 | 3 | $5E_g$    | 29.71 | 4 | $5E_g$    | 28.59 | 3 | $5T_{2g}$ |       |   |           |
| 19 | $T_{1g}$ | 2.797 | 285 | 30751 | 40.27 | 3 | $5T_{1g}$ | 21.82 | 4 | $5T_{2g}$ | 13.84 | 3 | $5E_g$    | 10.86 | 3 | $5T_{2g}$ |
| 15 | $E_g$    | 2.797 | 285 | 30819 | 28.81 | 4 | $5E_g$    | 25.41 | 4 | $5T_{2g}$ | 18.20 | 2 | $5A_{1g}$ |       |   |           |
| 25 | $T_{2g}$ | 2.798 | 284 | 30895 | 27.89 | 2 | $5A_{1g}$ | 23.94 | 2 | $5T_{1g}$ | 18.43 | 4 | $5T_{2g}$ | 12.98 | 4 | $5E_g$    |
|    |          |       |     |       | 10.47 | 3 | $5T_{1g}$ |       |   |           |       |   |           |       |   |           |
| 20 | $T_{1g}$ | 2.798 | 284 | 30926 | 42.40 | 3 | $5T_{1g}$ | 38.25 | 4 | $5E_g$    |       |   |           |       |   |           |
| 21 | $T_{1g}$ | 2.797 | 285 | 31709 | 56.79 | 3 | $5T_{2g}$ | 20.63 | 3 | $5E_g$    | 11.73 | 2 | $5T_{1g}$ |       |   |           |
| 16 | $E_g$    | 2.797 | 285 | 31757 | 30.99 | 3 | $5T_{2g}$ | 29.07 | 2 | $5T_{1g}$ | 28.90 | 3 | $5E_g$    |       |   |           |
| 22 | $T_{1g}$ | 2.797 | 285 | 31772 | 35.81 | 2 | $5T_{1g}$ | 26.96 | 3 | $5E_g$    | 17.68 | 3 | $5T_{2g}$ | 10.42 | 4 | $5T_{2g}$ |
| 11 | $A_{1g}$ | 2.797 | 285 | 31812 | 61.93 | 4 | $5T_{2g}$ | 26.16 | 3 | $5E_g$    | 10.33 | 4 | $5E_g$    |       |   |           |
| 23 | $T_{1g}$ | 2.797 | 285 | 31856 | 38.21 | 4 | $5T_{2g}$ | 24.23 | 2 | $5T_{1g}$ | 14.89 | 4 | $5E_g$    | 13.27 | 3 | $5T_{1g}$ |
| 26 | $T_{2g}$ | 2.797 | 285 | 31897 | 34.64 | 4 | $5T_{2g}$ | 29.53 | 3 | $5T_{1g}$ | 11.77 | 4 | $5E_g$    |       |   |           |
| 9  | $A_{2g}$ | 2.798 | 284 | 32058 | 51.10 | 4 | $5E_g$    | 36.67 | 3 | $5T_{1g}$ | 11.99 | 2 | $5T_{1g}$ |       |   |           |
| 27 | $T_{2g}$ | 2.798 | 284 | 32094 | 40.56 | 3 | $5T_{1g}$ | 26.56 | 4 | $5E_g$    | 24.33 | 2 | $5A_{1g}$ |       |   |           |
| 17 | $E_g$    | 2.798 | 284 | 32106 | 40.50 | 3 | $5T_{1g}$ | 30.54 | 2 | $5A_{1g}$ | 21.63 | 4 | $5E_g$    |       |   |           |

<sup>a</sup> Absorption oscillator strengths for  $1 \Gamma_{6u,8u,7u} \rightarrow i$  transitions are calculated at  $d_{Eu-F} = 2.950 \text{ \AA}$ ; the reference value is  $f_{ref} = 1.906 \times 10^{-3}$ . Emission oscillator strengths for  $1 \Gamma_{8g} \rightarrow 1 \Gamma_{6u,1} \Gamma_{8u,1} \Gamma_{7u}$  and radiative emission lifetime are calculated at  $d_{Eu-F} = 2.900 \text{ \AA}$ ; the reference value is  $f_{ref} = 9.517 \times 10^{-4}$ .

<sup>b</sup> The analyses of the wave functions have been done at  $d_{Eu-F} = 2.900 \text{ \AA}$  ( $4f^7$ ),  $2.900 \text{ \AA}$  ( $4f^6(5d^1 + 6sa_{1g}^1)$ ),  $2.800 \text{ \AA}$  ( $4f^6$ ).

<sup>c</sup> C.f. Table S7.

<sup>d</sup> C.f. Table S8.

TABLE S14: Spectroscopic constants and analyses of the spin-orbit wave functions of the ground and lowest lying excited states of  $\text{Eu}^{2+}$  and  $\text{Eu}^{3+}$ -doped BaS octahedral defects. Eu-S bond distances ( $d_{\text{Eu-S},e}$  in Å),  $\text{EuS}_6$  breathing mode harmonic vibrational frequencies ( $\omega_{a_{1g}}$  in  $\text{cm}^{-1}$ ), minimum-to-minimum energy differences ( $T_e$  in  $\text{cm}^{-1}$ ), and relative absorption and emission oscillator strengths ( $f_i^{abs}/f_{ref}$  and  $f_i^{emi}/f_{ref}$ ) are given. Calculated radiative emission lifetime for the  $4f^6(^7F_J)5de_g^1 - 1\Gamma_{8g}$  excited state is  $0.263 \mu\text{s}$ . Local distortion around the  $\text{Eu}^{2+}$  impurity, relative to experimental crystal structure  $d_{Ba-F} = 3.187 \text{ \AA}$ , is  $d_{\text{Eu-S},e}(1\Gamma_{6u}) - d_{\text{Ba-S}} = -0.100$ ; ionic radii mismatch is  $+0.17 \text{ \AA}^{31}$ . See Fig. 3, S3 and text for details.

| State                                                 | $d_{\text{Eu-S},e}$ | $\omega_{a_{1g}}$ | $T_e$ | $f_i^{abs}/f_{ref}$ <sup>a</sup> | $f_i^{emi}/f_{ref}$ <sup>a</sup> | weights of terms larger than 10% <sup>b</sup> |       |              |       |              |       |              |
|-------------------------------------------------------|---------------------|-------------------|-------|----------------------------------|----------------------------------|-----------------------------------------------|-------|--------------|-------|--------------|-------|--------------|
| Eu <sup>2+</sup> -doped BaS                           |                     |                   |       |                                  |                                  |                                               |       |              |       |              |       |              |
| $4f^7(^8S_{7/2})^c$                                   |                     |                   |       |                                  |                                  |                                               |       |              |       |              |       |              |
| 1 $\Gamma_{6u}$                                       | 3.087               | 204               | 0     | 1.00                             | 97.73                            | 1 $^8A_{1u}$                                  |       |              |       |              |       |              |
| 1 $\Gamma_{8u}$                                       | 3.087               | 204               | 0     | 0.42                             | 97.73                            | 1 $^8A_{1u}$                                  |       |              |       |              |       |              |
| 1 $\Gamma_{7u}$                                       | 3.087               | 204               | 0     | 0.07                             | 97.74                            | 1 $^8A_{1u}$                                  |       |              |       |              |       |              |
| $4f^6(5d + IT E_{a_{1g}})^1$ excited states           |                     |                   |       |                                  |                                  |                                               |       |              |       |              |       |              |
| $4f^6(^7F_J)5dt_{2g}$ High-Spin coupling <sup>d</sup> |                     |                   |       |                                  |                                  |                                               |       |              |       |              |       |              |
| 1 $\Gamma_{8g}$                                       | 3.037               | 196               | 20356 | 1.00                             | 37.31                            | 1 $^8T_{1g}$                                  | 24.88 | 1 $^8T_{2g}$ | 22.01 | 1 $^8E_g$    | 12.70 | 2 $^8T_{1g}$ |
| 2 $\Gamma_{8g}$                                       | 3.036               | 196               | 20624 | 0.64                             | 34.34                            | 1 $^8T_{2g}$                                  | 32.70 | 1 $^8T_{1g}$ | 20.38 | 1 $^8E_g$    |       |              |
| 1 $\Gamma_{7g}$                                       | 3.035               | 196               | 20837 | 1.28                             | 55.81                            | 1 $^8T_{2g}$                                  | 30.04 | 2 $^8T_{1g}$ |       |              |       |              |
| 3 $\Gamma_{8g}$                                       | 3.035               | 196               | 21115 | 1.52                             | 40.40                            | 1 $^8T_{2g}$                                  | 22.77 | 1 $^8E_g$    | 19.82 | 1 $^8T_{1g}$ | 12.55 | 2 $^8T_{1g}$ |
| 1 $\Gamma_{6g}$                                       | 3.035               | 196               | 21144 | 0.36                             | 51.49                            | 1 $^8T_{1g}$                                  | 22.58 | 1 $^8E_g$    | 11.58 | 1 $^8T_{2g}$ | 10.33 | 2 $^8T_{1g}$ |
| 2 $\Gamma_{7g}$                                       | 3.035               | 196               | 21381 | 2.41                             | 40.89                            | 2 $^8T_{1g}$                                  | 33.02 | 1 $^8T_{2g}$ | 15.13 | 1 $^8E_g$    |       |              |
| 4 $\Gamma_{8g}$                                       | 3.035               | 196               | 21689 | 1.60                             | 33.38                            | 1 $^8T_{2g}$                                  | 31.69 | 1 $^8T_{1g}$ | 15.40 | 2 $^8T_{1g}$ | 14.06 | 1 $^8E_g$    |
| 2 $\Gamma_{6g}$                                       | 3.035               | 196               | 21760 | 0.53                             | 49.72                            | 1 $^8T_{1g}$                                  | 26.38 | 1 $^8E_g$    |       |              |       |              |
| 5 $\Gamma_{8g}$                                       | 3.034               | 196               | 21963 | 5.61                             | 44.20                            | 2 $^8T_{1g}$                                  | 27.44 | 1 $^8T_{2g}$ | 21.53 | 1 $^8T_{1g}$ |       |              |
| 6 $\Gamma_{8g}$                                       | 3.034               | 195               | 22410 | 2.07                             | 49.45                            | 1 $^8T_{1g}$                                  | 19.11 | 1 $^8E_g$    | 13.63 | 2 $^8T_{1g}$ | 10.14 | 1 $^8T_{2g}$ |
| 3 $\Gamma_{7g}$                                       | 3.034               | 196               | 22529 | 2.82                             | 39.36                            | 2 $^8T_{1g}$                                  | 22.32 | 1 $^8E_g$    | 14.85 | 1 $^8T_{2g}$ | 10.80 | 1 $^8T_{1g}$ |
| 7 $\Gamma_{8g}$                                       | 3.034               | 196               | 22543 | 3.79                             | 48.22                            | 1 $^8T_{2g}$                                  | 20.41 | 2 $^8T_{1g}$ | 16.72 | 1 $^8T_{1g}$ |       |              |
| 3 $\Gamma_{6g}$                                       | 3.034               | 196               | 22749 | 1.81                             | 40.39                            | 2 $^8T_{1g}$                                  | 36.97 | 1 $^8T_{2g}$ | 18.16 | 1 $^8T_{1g}$ |       |              |
| 4 $\Gamma_{6g}$                                       | 3.032               | 196               | 23081 | 0.08                             | 23.12                            | 2 $^8T_{2g}$                                  | 22.39 | 3 $^8T_{1g}$ | 20.54 | 2 $^8E_g$    | 10.38 | 2 $^8T_{1g}$ |
| 4 $\Gamma_{7g}$                                       | 3.033               | 195               | 23112 | 1.13                             | 51.47                            | 1 $^8T_{1g}$                                  | 17.70 | 1 $^8T_{2g}$ | 12.72 | 2 $^8E_g$    |       |              |
| 8 $\Gamma_{8g}$                                       | 3.032               | 195               | 23119 | 0.87                             | 24.36                            | 2 $^8T_{2g}$                                  | 18.70 | 2 $^8E_g$    | 13.50 | 3 $^8T_{1g}$ | 12.41 | 2 $^8T_{1g}$ |
| 9 $\Gamma_{8g}$                                       | 3.034               | 197               | 23192 | 1.15                             | 21.52                            | 1 $^8T_{2g}$                                  | 19.85 | 1 $^8E_g$    | 15.93 | 2 $^8T_{1g}$ | 13.62 | 1 $^8T_{1g}$ |
|                                                       |                     |                   |       |                                  | 12.48                            | 2 $^8T_{2g}$                                  |       |              |       |              |       |              |
| 5 $\Gamma_{7g}$                                       | 3.031               | 195               | 23269 | 0.76                             | 30.43                            | 2 $^8T_{2g}$                                  | 16.47 | 3 $^8T_{1g}$ | 11.26 | 1 $^8T_{2g}$ | 10.34 | 1 $^8T_{1g}$ |
| 5 $\Gamma_{6g}$                                       | 3.033               | 195               | 23417 | 1.34                             | 40.00                            | 1 $^8T_{2g}$                                  | 15.36 | 2 $^8T_{1g}$ | 13.54 | 2 $^8T_{2g}$ | 10.80 | 2 $^8E_g$    |
| 6 $\Gamma_{7g}$                                       | 3.034               | 196               | 23578 | 2.45                             | 34.98                            | 1 $^8T_{1g}$                                  | 22.56 | 1 $^8E_g$    | 22.50 | 2 $^8T_{1g}$ | 12.17 | 1 $^8T_{2g}$ |
| 10 $\Gamma_{8g}$                                      | 3.033               | 195               | 23669 | 3.68                             | 23.93                            | 2 $^8T_{2g}$                                  | 18.59 | 2 $^8E_g$    | 13.95 | 2 $^8T_{1g}$ | 11.50 | 1 $^8T_{2g}$ |
|                                                       |                     |                   |       |                                  | 11.04                            | 3 $^8T_{1g}$                                  | 10.13 | 1 $^8E_g$    |       |              |       |              |
| 11 $\Gamma_{8g}$                                      | 3.034               | 197               | 23735 | 0.85                             | 22.13                            | 2 $^8T_{1g}$                                  | 21.50 | 1 $^8E_g$    | 17.69 | 2 $^8E_g$    | 17.62 | 2 $^8T_{2g}$ |
| 12 $\Gamma_{8g}$                                      | 3.032               | 196               | 23894 | 0.77                             | 33.80                            | 2 $^8E_g$                                     | 27.70 | 3 $^8T_{1g}$ | 13.67 | 2 $^8T_{2g}$ |       |              |
| 6 $\Gamma_{6g}$                                       | 3.032               | 195               | 23899 | 0.50                             | 33.11                            | 2 $^8T_{2g}$                                  | 19.09 | 1 $^8T_{1g}$ | 10.58 | 3 $^8T_{1g}$ |       |              |
| 7 $\Gamma_{7g}$                                       | 3.032               | 196               | 23957 | 0.88                             | 23.37                            | 2 $^8T_{1g}$                                  | 23.19 | 1 $^8T_{2g}$ | 17.70 | 3 $^8T_{1g}$ | 15.97 | 2 $^8T_{2g}$ |
| 7 $\Gamma_{6g}$                                       | 3.033               | 196               | 24213 | 4.43                             | 28.21                            | 2 $^8T_{1g}$                                  | 24.98 | 1 $^8T_{2g}$ | 18.07 | 1 $^8T_{1g}$ | 13.46 | 1 $^8E_g$    |
|                                                       |                     |                   |       |                                  | 11.13                            | 3 $^8T_{1g}$                                  |       |              |       |              |       |              |
| 13 $\Gamma_{8g}$                                      | 3.032               | 196               | 24271 | 5.78                             | 24.45                            | 1 $^8T_{2g}$                                  | 24.07 | 2 $^8T_{1g}$ | 17.79 | 1 $^8T_{1g}$ | 13.05 | 3 $^8T_{1g}$ |
| 14 $\Gamma_{8g}$                                      | 3.034               | 196               | 24400 | 0.77                             | 30.15                            | 2 $^8T_{2g}$                                  | 25.16 | 1 $^8T_{2g}$ | 13.30 | 1 $^8E_g$    | 13.18 | 2 $^8E_g$    |
| 15 $\Gamma_{8g}$                                      | 3.034               | 197               | 24511 | 3.43                             | 21.04                            | 1 $^8E_g$                                     | 19.68 | 2 $^8T_{1g}$ | 18.92 | 2 $^8E_g$    | 17.57 | 1 $^8T_{1g}$ |
| 8 $\Gamma_{7g}$                                       | 3.033               | 196               | 24722 | 1.37                             | 29.60                            | 3 $^8T_{1g}$                                  | 10.02 | 2 $^8T_{1g}$ |       |              |       |              |
| 16 $\Gamma_{8g}$                                      | 3.034               | 196               | 24746 | 1.34                             | 21.68                            | 1 $^8E_g$                                     | 13.70 | 1 $^8T_{1g}$ | 13.44 | 2 $^8E_g$    | 10.95 | 2 $^8T_{2g}$ |
|                                                       |                     |                   |       |                                  | 10.91                            | 1 $^8T_{2g}$                                  |       |              |       |              |       |              |
| 9 $\Gamma_{7g}$                                       | 3.033               | 196               | 24943 | 0.91                             | 24.61                            | 3 $^8T_{1g}$                                  | 14.64 | 2 $^8E_g$    | 14.10 | 2 $^8T_{1g}$ | 11.41 | 1 $^8T_{1g}$ |
| 17 $\Gamma_{8g}$                                      | 3.033               | 196               | 24985 | 1.13                             | 23.16                            | 2 $^8T_{2g}$                                  | 18.93 | 3 $^8T_{1g}$ | 10.93 | 2 $^8T_{1g}$ |       |              |
| 8 $\Gamma_{6g}$                                       | 3.032               | 196               | 25047 | 0.16                             | 48.99                            | 2 $^8T_{2g}$                                  | 10.36 | 3 $^8T_{1g}$ |       |              |       |              |
| 18 $\Gamma_{8g}$                                      | 3.033               | 196               | 25072 | 2.94                             | 25.49                            | 3 $^8T_{1g}$                                  | 24.37 | 2 $^8T_{1g}$ | 17.09 | 1 $^8T_{1g}$ | 14.69 | 2 $^8T_{2g}$ |
| 9 $\Gamma_{6g}$                                       | 3.034               | 196               | 25425 | 0.04                             | 34.63                            | 1 $^8T_{2g}$                                  | 25.84 | 2 $^8E_g$    | 14.80 | 1 $^8E_g$    |       |              |



|                                                          |               |       |     |       |       |       |                |       |                |       |                |       |                |
|----------------------------------------------------------|---------------|-------|-----|-------|-------|-------|----------------|-------|----------------|-------|----------------|-------|----------------|
| 19                                                       | $\Gamma_{8g}$ | 3.034 | 196 | 25443 | 0.60  | 27.62 | 1 ${}^8T_{2g}$ | 19.11 | 2 ${}^8E_g$    | 16.06 | 1 ${}^8T_{1g}$ | 15.70 | 1 ${}^8E_g$    |
|                                                          |               |       |     |       |       | 11.65 | 3 ${}^8T_{1g}$ |       |                |       |                |       |                |
| 10                                                       | $\Gamma_{7g}$ | 3.034 | 196 | 25550 | 0.13  | 27.27 | 1 ${}^8T_{1g}$ | 20.18 | 1 ${}^8T_{2g}$ | 17.45 | 2 ${}^8E_g$    | 15.75 | 1 ${}^8E_g$    |
| 10                                                       | $\Gamma_{6g}$ | 3.033 | 196 | 25755 | 5.45  | 63.77 | 2 ${}^8T_{1g}$ | 21.50 | 1 ${}^8T_{2g}$ |       |                |       |                |
| 20                                                       | $\Gamma_{8g}$ | 3.033 | 196 | 25784 | 11.17 | 51.65 | 2 ${}^8T_{1g}$ | 15.11 | 1 ${}^8T_{2g}$ | 10.92 | 1 ${}^8T_{1g}$ |       |                |
| 21                                                       | $\Gamma_{8g}$ | 3.033 | 196 | 25803 | 10.07 | 42.34 | 2 ${}^8T_{1g}$ | 18.96 | 1 ${}^8T_{1g}$ |       |                |       |                |
| 22                                                       | $\Gamma_{8g}$ | 3.031 | 195 | 25989 | 0.25  | 51.27 | 2 ${}^8T_{2g}$ | 22.50 | 3 ${}^8T_{1g}$ |       |                |       |                |
| 11                                                       | $\Gamma_{7g}$ | 3.031 | 195 | 25997 | 0.03  | 64.46 | 2 ${}^8T_{2g}$ |       |                |       |                |       |                |
| 23                                                       | $\Gamma_{8g}$ | 3.032 | 196 | 26054 | 0.37  | 35.77 | 2 ${}^8T_{2g}$ | 14.84 | 2 ${}^8E_g$    | 12.82 | 3 ${}^8T_{1g}$ |       |                |
| 11                                                       | $\Gamma_{6g}$ | 3.032 | 195 | 26165 | 0.41  | 32.05 | 3 ${}^8T_{1g}$ | 20.58 | 2 ${}^8T_{2g}$ | 10.04 | 1 ${}^8T_{1g}$ |       |                |
| 12                                                       | $\Gamma_{6g}$ | 3.033 | 196 | 26223 | 0.91  | 21.92 | 3 ${}^8T_{1g}$ | 15.94 | 2 ${}^8E_g$    |       |                |       |                |
| 24                                                       | $\Gamma_{8g}$ | 3.033 | 195 | 26370 | 0.94  | 43.60 | 3 ${}^8T_{1g}$ | 17.22 | 1 ${}^8T_{1g}$ |       |                |       |                |
| 12                                                       | $\Gamma_{7g}$ | 3.034 | 195 | 26451 | 0.44  | 46.21 | 3 ${}^8T_{1g}$ | 17.93 | 1 ${}^8T_{1g}$ |       |                |       |                |
| 25                                                       | $\Gamma_{8g}$ | 3.034 | 194 | 26802 |       | 85.62 | 1 ${}^6T_{1g}$ |       |                |       |                |       |                |
| 26                                                       | $\Gamma_{8g}$ | 3.032 | 196 | 27106 | 0.39  | 39.30 | 2 ${}^8T_{2g}$ | 25.68 | 2 ${}^8E_g$    | 13.08 | 3 ${}^8T_{1g}$ |       |                |
| 13                                                       | $\Gamma_{7g}$ | 3.032 | 196 | 27284 | 0.01  | 43.71 | 2 ${}^8T_{2g}$ | 15.44 | 2 ${}^8E_g$    |       |                |       |                |
| 27                                                       | $\Gamma_{8g}$ | 3.032 | 195 | 27415 | 0.71  | 38.94 | 3 ${}^8T_{1g}$ | 28.45 | 2 ${}^8T_{2g}$ | 15.74 | 2 ${}^8E_g$    |       |                |
| 13                                                       | $\Gamma_{6g}$ | 3.030 | 195 | 27487 | 0.21  | 38.95 | 2 ${}^8T_{2g}$ | 30.56 | 3 ${}^8T_{1g}$ |       |                |       |                |
| 28                                                       | $\Gamma_{8g}$ | 3.032 | 195 | 27538 | 0.87  | 49.13 | 3 ${}^8T_{1g}$ | 20.70 | 2 ${}^8E_g$    | 17.22 | 2 ${}^8T_{2g}$ |       |                |
| 14                                                       | $\Gamma_{7g}$ | 3.032 | 196 | 27926 | 0.42  | 40.25 | 3 ${}^8T_{1g}$ |       |                |       |                |       |                |
| 29                                                       | $\Gamma_{8g}$ | 3.032 | 196 | 28010 | 0.88  | 44.19 | 3 ${}^8T_{1g}$ |       |                |       |                |       |                |
| 14                                                       | $\Gamma_{6g}$ | 3.032 | 196 | 28036 | 0.45  | 44.72 | 3 ${}^8T_{1g}$ |       |                |       |                |       |                |
| $4f^6({}^7F_J)5dt_{2g}^1$ Low-Spin coupling <sup>d</sup> |               |       |     |       |       |       |                |       |                |       |                |       |                |
| 30                                                       | $\Gamma_{8g}$ | 3.033 | 194 | 28106 | 0.01  | 80.13 | 1 ${}^6T_{1g}$ |       |                |       |                |       |                |
| 15                                                       | $\Gamma_{7g}$ | 3.033 | 194 | 28146 | 0.01  | 79.76 | 1 ${}^6T_{1g}$ |       |                |       |                |       |                |
| 16                                                       | $\Gamma_{7g}$ | 3.026 | 192 | 29697 | 0.03  | 37.16 | 2 ${}^6T_{1g}$ | 34.73 | 1 ${}^6E_g$    | 22.40 | 1 ${}^6T_{1g}$ |       |                |
| 31                                                       | $\Gamma_{8g}$ | 3.030 | 194 | 29946 | 0.19  | 54.36 | 1 ${}^6T_{1g}$ | 27.52 | 1 ${}^6T_{2g}$ |       |                |       |                |
| 15                                                       | $\Gamma_{6g}$ | 3.027 | 190 | 29952 | 0.11  | 53.76 | 1 ${}^6T_{1g}$ | 27.27 | 1 ${}^6T_{2g}$ |       |                |       |                |
| 32                                                       | $\Gamma_{8g}$ | 3.025 | 193 | 30088 | 0.03  | 50.25 | 2 ${}^6T_{1g}$ | 24.68 | 1 ${}^6E_g$    | 10.15 | 1 ${}^6T_{2g}$ |       |                |
| 17                                                       | $\Gamma_{7g}$ | 3.027 | 192 | 30182 | 0.07  | 29.22 | 1 ${}^6T_{2g}$ | 28.62 | 1 ${}^6T_{1g}$ | 26.56 | 2 ${}^6T_{1g}$ |       |                |
| 16                                                       | $\Gamma_{6g}$ | 3.025 | 192 | 30263 | 0.01  | 28.32 | 2 ${}^6T_{1g}$ | 19.53 | 1 ${}^6T_{2g}$ | 16.57 | 1 ${}^6E_g$    | 15.18 | 2 ${}^6T_{2g}$ |
| 33                                                       | $\Gamma_{8g}$ | 3.024 | 191 | 30617 | 0.05  | 23.56 | 2 ${}^6T_{1g}$ | 21.26 | 2 ${}^6T_{2g}$ | 20.97 | 1 ${}^6E_g$    | 15.47 | 1 ${}^6A_{2g}$ |
| 18                                                       | $\Gamma_{7g}$ | 3.028 | 193 | 30810 | 0.06  | 37.62 | 1 ${}^6T_{1g}$ | 25.99 | 2 ${}^6T_{1g}$ | 17.14 | 1 ${}^6T_{2g}$ |       |                |
| 17                                                       | $\Gamma_{6g}$ | 3.025 | 191 | 30924 | 0.04  | 36.91 | 1 ${}^6T_{2g}$ | 35.72 | 2 ${}^6T_{1g}$ | 11.79 | 1 ${}^6E_g$    |       |                |
| 34                                                       | $\Gamma_{8g}$ | 3.024 | 191 | 31133 | 0.04  | 19.32 | 1 ${}^6A_{2g}$ | 18.05 | 2 ${}^6T_{2g}$ | 12.92 | 1 ${}^6T_{2g}$ | 12.10 | 2 ${}^6T_{1g}$ |
|                                                          |               |       |     |       |       | 11.36 | 1 ${}^6T_{1g}$ | 10.12 | 1 ${}^6E_g$    |       |                |       |                |
| 18                                                       | $\Gamma_{6g}$ | 3.023 | 191 | 31327 | 0.01  | 38.08 | 1 ${}^6A_{2g}$ | 25.02 | 2 ${}^6T_{2g}$ | 10.90 | 2 ${}^6T_{1g}$ |       |                |
| 35                                                       | $\Gamma_{8g}$ | 3.026 | 192 | 31397 | 0.20  | 33.91 | 2 ${}^6T_{1g}$ | 29.00 | 1 ${}^6T_{2g}$ | 20.01 | 1 ${}^6E_g$    |       |                |
| 36                                                       | $\Gamma_{8g}$ | 3.024 | 191 | 31520 | 0.17  | 25.27 | 1 ${}^6E_g$    | 23.29 | 1 ${}^6T_{2g}$ | 21.36 | 2 ${}^6T_{1g}$ |       |                |
| 19                                                       | $\Gamma_{6g}$ | 3.026 | 191 | 31949 | 0.16  | 34.03 | 1 ${}^6E_g$    | 33.10 | 1 ${}^6T_{2g}$ | 19.87 | 2 ${}^6T_{2g}$ |       |                |
| 37                                                       | $\Gamma_{8g}$ | 3.021 | 190 | 32023 | 0.24  | 21.47 | 3 ${}^6T_{1g}$ | 19.56 | 1 ${}^6E_g$    | 16.32 | 2 ${}^6T_{1g}$ | 15.58 | 2 ${}^6T_{2g}$ |
|                                                          |               |       |     |       |       | 10.79 | 2 ${}^6E_g$    |       |                |       |                |       |                |
| 38                                                       | $\Gamma_{8g}$ | 3.023 | 192 | 32143 | 0.10  | 24.60 | 2 ${}^6T_{2g}$ | 21.38 | 1 ${}^6T_{2g}$ | 14.87 | 2 ${}^6E_g$    | 12.11 | 2 ${}^6T_{1g}$ |
|                                                          |               |       |     |       |       | 11.50 | 3 ${}^6T_{1g}$ |       |                |       |                |       |                |
| 19                                                       | $\Gamma_{7g}$ | 3.026 | 190 | 32389 |       | 52.06 | 2 ${}^6T_{1g}$ | 29.74 | 1 ${}^6T_{2g}$ |       |                |       |                |
| 20                                                       | $\Gamma_{7g}$ | 3.020 | 192 | 32540 | 0.16  | 36.93 | 3 ${}^6T_{1g}$ | 16.60 | 2 ${}^6E_g$    | 14.26 | 1 ${}^6A_{1g}$ | 12.84 | 2 ${}^6T_{1g}$ |
| 20                                                       | $\Gamma_{6g}$ | 3.022 | 190 | 32565 | 0.02  | 35.76 | 2 ${}^6E_g$    | 24.27 | 2 ${}^6T_{2g}$ | 20.02 | 1 ${}^6E_g$    |       |                |
| 39                                                       | $\Gamma_{8g}$ | 3.021 | 191 | 32827 | 0.05  | 24.09 | 2 ${}^6E_g$    | 19.59 | 2 ${}^6T_{2g}$ | 15.85 | 1 ${}^6A_{2g}$ | 15.59 | 3 ${}^6T_{1g}$ |
| 21                                                       | $\Gamma_{6g}$ | 3.026 | 192 | 32932 | 0.17  | 48.13 | 1 ${}^6T_{2g}$ | 13.18 | 3 ${}^6T_{1g}$ | 10.38 | 2 ${}^6T_{1g}$ |       |                |
| 40                                                       | $\Gamma_{8g}$ | 3.026 | 191 | 33040 | 0.13  | 39.50 | 2 ${}^6T_{1g}$ | 22.71 | 1 ${}^6T_{2g}$ | 12.30 | 2 ${}^6T_{2g}$ |       |                |
| 21                                                       | $\Gamma_{7g}$ | 3.025 | 190 | 33195 | 0.04  | 37.62 | 2 ${}^6T_{1g}$ | 29.05 | 1 ${}^6E_g$    | 13.94 | 3 ${}^6T_{1g}$ | 12.82 | 2 ${}^6T_{2g}$ |
| 41                                                       | $\Gamma_{8g}$ | 3.021 | 191 | 33197 | 0.19  | 33.80 | 2 ${}^6T_{2g}$ | 22.44 | 3 ${}^6T_{1g}$ | 14.91 | 1 ${}^6T_{2g}$ | 13.35 | 1 ${}^6A_{1g}$ |
| 42                                                       | $\Gamma_{8g}$ | 3.026 | 191 | 33442 | 0.26  | 34.88 | 2 ${}^6T_{1g}$ | 31.20 | 1 ${}^6T_{2g}$ | 16.99 | 1 ${}^6E_g$    |       |                |
| 22                                                       | $\Gamma_{7g}$ | 3.021 | 191 | 33499 | 0.06  | 33.03 | 2 ${}^6E_g$    | 29.63 | 3 ${}^6T_{1g}$ | 13.08 | 1 ${}^6E_g$    |       |                |
| 43                                                       | $\Gamma_{8g}$ | 3.026 | 191 | 33772 | 0.51  | 57.85 | 1 ${}^6T_{2g}$ | 16.17 | 1 ${}^6E_g$    | 13.22 | 2 ${}^6T_{1g}$ |       |                |
| 23                                                       | $\Gamma_{7g}$ | 3.021 | 191 | 34051 | 0.10  | 57.39 | 2 ${}^6T_{2g}$ | 22.75 | 1 ${}^6A_{1g}$ |       |                |       |                |
| 44                                                       | $\Gamma_{8g}$ | 3.021 | 190 | 34173 | 0.15  | 25.73 | 2 ${}^6T_{2g}$ | 20.05 | 1 ${}^6A_{1g}$ | 15.19 | 2 ${}^6E_g$    | 12.24 | 1 ${}^6A_{2g}$ |
|                                                          |               |       |     |       |       | 11.23 | 3 ${}^6T_{1g}$ |       |                |       |                |       |                |
| 22                                                       | $\Gamma_{6g}$ | 3.021 | 191 | 34240 | 0.02  | 28.58 | 3 ${}^6T_{1g}$ | 24.74 | 1 ${}^6A_{2g}$ | 22.61 | 2 ${}^6T_{2g}$ | 16.44 | 1 ${}^6T_{2g}$ |
| 45                                                       | $\Gamma_{8g}$ | 3.022 | 189 | 34357 | 0.01  | 59.49 | 3 ${}^6T_{1g}$ | 10.92 | 2 ${}^6T_{2g}$ |       |                |       |                |
| 46                                                       | $\Gamma_{8g}$ | 3.021 | 192 | 34385 | 0.09  | 32.73 | 3 ${}^6T_{1g}$ | 26.42 | 2 ${}^6E_g$    | 18.79 | 2 ${}^6T_{2g}$ | 10.75 | 1 ${}^6T_{2g}$ |

|                                                                          |               |       |     |       |       |       |             |       |             |       |             |
|--------------------------------------------------------------------------|---------------|-------|-----|-------|-------|-------|-------------|-------|-------------|-------|-------------|
| 23                                                                       | $\Gamma_{6g}$ | 3.021 | 190 | 35443 | 0.10  | 38.85 | $3^6T_{1g}$ | 36.07 | $2^6T_{2g}$ | 13.46 | $1^6A_{2g}$ |
| 47                                                                       | $\Gamma_{8g}$ | 3.021 | 190 | 35494 | 0.07  | 41.46 | $2^6T_{2g}$ | 25.71 | $2^6E_g$    | 15.23 | $1^6A_{2g}$ |
| 24                                                                       | $\Gamma_{7g}$ | 3.020 | 190 | 35665 | 0.12  | 51.29 | $3^6T_{1g}$ | 34.07 | $2^6E_g$    |       |             |
| 48                                                                       | $\Gamma_{8g}$ | 3.020 | 190 | 35668 | 0.13  | 34.46 | $3^6T_{1g}$ | 33.72 | $2^6E_g$    | 23.18 | $2^6T_{2g}$ |
| 24                                                                       | $\Gamma_{6g}$ | 3.020 | 190 | 35701 | 0.02  | 44.25 | $2^6E_g$    | 39.55 | $2^6T_{2g}$ |       |             |
| 25                                                                       | $\Gamma_{7g}$ | 3.019 | 189 | 35974 | 0.13  | 47.51 | $1^6A_{1g}$ | 40.03 | $3^6T_{1g}$ |       |             |
| 49                                                                       | $\Gamma_{8g}$ | 3.019 | 188 | 35997 | 1.97  | 45.03 | $1^6A_{1g}$ | 40.05 | $3^6T_{1g}$ |       |             |
| $4f^6(^7F_J)(5de_g^1 + IT E_{a_{1g}}^1)$ High-Spin coupling <sup>d</sup> |               |       |     |       |       |       |             |       |             |       |             |
| 50                                                                       | $\Gamma_{8g}$ | 3.054 | 164 | 36508 | 5.73  | 55.73 | $3^8T_{2g}$ | 34.05 | $4^8T_{1g}$ |       |             |
| 26                                                                       | $\Gamma_{7g}$ | 3.057 | 172 | 36598 | 3.24  | 63.36 | $3^8T_{2g}$ | 30.82 | $4^8T_{1g}$ |       |             |
| 51                                                                       | $\Gamma_{8g}$ | 3.054 | 162 | 36834 | 1.30  | 78.38 | $3^8T_{2g}$ |       |             |       |             |
| 27                                                                       | $\Gamma_{7g}$ | 3.050 | 172 | 37166 | 6.84  | 59.11 | $4^8T_{1g}$ | 29.74 | $3^8T_{2g}$ |       |             |
| 52                                                                       | $\Gamma_{8g}$ | 3.051 | 176 | 37524 | 9.53  | 42.93 | $3^8T_{2g}$ | 42.07 | $4^8T_{1g}$ |       |             |
| 25                                                                       | $\Gamma_{6g}$ | 3.051 | 172 | 37614 | 2.80  | 48.32 | $3^8T_{2g}$ | 28.76 | $4^8T_{1g}$ | 11.01 | $5^8T_{1g}$ |
| 53                                                                       | $\Gamma_{8g}$ | 3.051 | 171 | 38009 | 10.16 | 45.98 | $4^8T_{1g}$ | 38.45 | $3^8T_{2g}$ |       |             |
| 26                                                                       | $\Gamma_{6g}$ | 3.051 | 182 | 38176 | 3.92  | 32.89 | $4^8T_{1g}$ | 29.22 | $3^8T_{2g}$ | 14.74 | $3^8E_g$    |
| 28                                                                       | $\Gamma_{7g}$ | 3.052 | 175 | 38422 | 3.75  | 48.89 | $3^8T_{2g}$ | 33.66 | $4^8T_{1g}$ | 12.48 | $3^8E_g$    |
| 54                                                                       | $\Gamma_{8g}$ | 3.050 | 182 | 38573 | 4.13  | 31.72 | $4^8T_{2g}$ | 30.73 | $3^8T_{2g}$ | 16.50 | $3^8E_g$    |
| 55                                                                       | $\Gamma_{8g}$ | 3.048 | 164 | 38835 | 4.52  | 28.88 | $4^8T_{2g}$ | 25.83 | $4^8T_{1g}$ | 24.82 | $5^8T_{1g}$ |
| 27                                                                       | $\Gamma_{6g}$ | 3.046 | 158 | 38836 | 2.45  | 49.01 | $4^8T_{2g}$ | 29.89 | $4^8T_{1g}$ | 12.78 | $5^8T_{1g}$ |
| 56                                                                       | $\Gamma_{8g}$ | 3.053 | 193 | 39036 | 1.18  | 48.62 | $5^8T_{1g}$ | 40.97 | $3^8E_g$    |       |             |
| 57                                                                       | $\Gamma_{8g}$ | 3.051 | 169 | 39311 | 9.59  | 47.91 | $4^8T_{1g}$ | 30.63 | $3^8T_{2g}$ | 15.67 | $5^8T_{1g}$ |
| 29                                                                       | $\Gamma_{7g}$ | 3.051 | 164 | 39399 | 7.58  | 64.54 | $4^8T_{1g}$ | 24.85 | $3^8T_{2g}$ |       |             |
| 28                                                                       | $\Gamma_{6g}$ | 3.045 | 156 | 39590 | 1.08  | 35.23 | $4^8T_{2g}$ | 30.27 | $5^8T_{1g}$ | 18.23 | $3^8T_{2g}$ |
| 58                                                                       | $\Gamma_{8g}$ | 3.050 | 182 | 39626 | 1.50  | 36.78 | $4^8T_{2g}$ | 21.03 | $5^8T_{1g}$ | 16.58 | $3^8E_g$    |
|                                                                          |               |       |     |       |       | 11.07 | $3^8T_{2g}$ |       |             |       |             |
| 30                                                                       | $\Gamma_{7g}$ | 3.051 | 194 | 39691 | 0.02  | 41.02 | $4^8T_{2g}$ | 23.94 | $3^8E_g$    | 19.10 | $5^8T_{1g}$ |
| 29                                                                       | $\Gamma_{6g}$ | 3.054 | 164 | 39817 | 1.85  | 62.86 | $3^8T_{2g}$ | 19.45 | $5^8T_{1g}$ | 11.09 | $4^8T_{1g}$ |
| 59                                                                       | $\Gamma_{8g}$ | 3.052 | 180 | 40123 | 9.44  | 48.20 | $4^8T_{1g}$ | 18.20 | $3^8T_{2g}$ | 16.02 | $3^8E_g$    |
| 30                                                                       | $\Gamma_{6g}$ | 3.051 | 236 | 40215 | 0.72  | 37.70 | $4^8T_{2g}$ | 32.61 | $3^8E_g$    | 16.76 | $5^8T_{1g}$ |
| 60                                                                       | $\Gamma_{8g}$ | 3.051 | 204 | 40237 | 2.46  | 32.11 | $4^8T_{2g}$ | 29.70 | $3^8E_g$    | 22.28 | $5^8T_{1g}$ |
| 61                                                                       | $\Gamma_{8g}$ | 3.052 | 229 | 40726 | 3.50  | 39.03 | $3^8T_{2g}$ | 22.22 | $4^8T_{1g}$ | 15.62 | $3^8E_g$    |
| 31                                                                       | $\Gamma_{7g}$ | 3.047 | 163 | 40807 | 0.01  | 57.72 | $5^8T_{1g}$ | 24.83 | $4^8T_{2g}$ |       |             |
| 31                                                                       | $\Gamma_{6g}$ | 2.954 | 228 | 40866 | 7.45  | 70.37 | $4^8T_{1g}$ | 23.13 | $3^8T_{2g}$ |       |             |
| 62                                                                       | $\Gamma_{8g}$ | 3.051 | 232 | 40923 | 4.65  | 30.09 | $5^8T_{1g}$ | 24.25 | $3^8E_g$    | 21.33 | $4^8T_{2g}$ |
| 63                                                                       | $\Gamma_{8g}$ | 3.051 | 229 | 41035 | 10.86 | 43.91 | $4^8T_{1g}$ | 21.34 | $5^8T_{1g}$ | 14.93 | $4^8T_{2g}$ |
| 32                                                                       | $\Gamma_{6g}$ | 3.000 | 464 | 41101 | 0.87  | 48.91 | $6^8T_{1g}$ | 41.16 | $5^8T_{2g}$ |       |             |
| 64                                                                       | $\Gamma_{8g}$ | 3.000 | 295 | 41349 | 1.09  | 53.28 | $4^8T_{2g}$ | 23.08 | $5^8T_{1g}$ | 17.29 | $3^8E_g$    |
| 32                                                                       | $\Gamma_{7g}$ | 3.050 | 295 | 41479 | 0.01  | 54.24 | $4^8T_{2g}$ | 33.19 | $3^8E_g$    |       |             |
| 33                                                                       | $\Gamma_{6g}$ | 3.044 | 171 | 41658 | 0.01  | 51.39 | $4^8T_{2g}$ | 39.22 | $5^8T_{1g}$ |       |             |
| 65                                                                       | $\Gamma_{8g}$ | 2.969 | 151 | 41681 | 0.03  | 51.80 | $6^8T_{1g}$ | 39.99 | $5^8T_{2g}$ |       |             |
| 66                                                                       | $\Gamma_{8g}$ | 3.000 | 491 | 41810 | 3.37  | 59.53 | $6^8T_{1g}$ | 35.55 | $5^8T_{2g}$ |       |             |
| 33                                                                       | $\Gamma_{7g}$ | 2.992 | 163 | 42004 | 0.04  | 55.10 | $5^8T_{2g}$ | 24.75 | $6^8T_{1g}$ |       |             |
| 67                                                                       | $\Gamma_{8g}$ | 3.050 | 489 | 42222 | 0.63  | 47.11 | $5^8T_{1g}$ | 37.01 | $3^8E_g$    |       |             |
| 34                                                                       | $\Gamma_{6g}$ | 3.052 | 271 | 42281 | 0.29  | 56.82 | $5^8T_{1g}$ | 32.17 | $3^8E_g$    |       |             |
| 34                                                                       | $\Gamma_{7g}$ | 2.943 | 236 | 42325 | 0.01  | 73.80 | $5^8T_{1g}$ | 14.06 | $3^8E_g$    |       |             |
| 68                                                                       | $\Gamma_{8g}$ | 3.047 | 143 | 42521 | 0.10  | 60.86 | $5^8T_{1g}$ | 23.02 | $3^8E_g$    |       |             |
| 35                                                                       | $\Gamma_{6g}$ | 3.000 | 453 | 42604 | 0.01  | 60.16 | $5^8T_{2g}$ | 34.48 | $6^8T_{1g}$ |       |             |
| 69                                                                       | $\Gamma_{8g}$ | 3.000 | 518 | 42722 | 0.18  | 47.44 | $6^8T_{1g}$ | 37.13 | $5^8T_{2g}$ |       |             |
| 35                                                                       | $\Gamma_{7g}$ | 3.006 | 202 | 42806 | 0.02  | 54.03 | $5^8T_{2g}$ | 33.26 | $6^8T_{1g}$ |       |             |
| 70                                                                       | $\Gamma_{8g}$ | 3.049 | 337 | 43072 | 0.10  | 75.37 | $4^8T_{2g}$ | 12.16 | $3^8E_g$    |       |             |
| 71                                                                       | $\Gamma_{8g}$ | 3.050 | 299 | 43233 | 0.03  | 67.40 | $4^8T_{2g}$ | 28.43 | $5^8T_{1g}$ |       |             |
| 36                                                                       | $\Gamma_{7g}$ | 3.042 | 161 | 43245 | 0.01  | 70.53 | $4^8T_{2g}$ | 26.37 | $5^8T_{1g}$ |       |             |
| 72                                                                       | $\Gamma_{8g}$ | 2.990 | 188 | 43446 | 0.05  | 58.07 | $6^8T_{1g}$ | 40.93 | $5^8T_{2g}$ |       |             |
| 36                                                                       | $\Gamma_{6g}$ | 2.938 | 187 | 43495 | 0.02  | 38.54 | $6^8T_{1g}$ | 18.85 | $5^8T_{2g}$ |       |             |
| 73                                                                       | $\Gamma_{8g}$ | 2.993 | 187 | 43573 | 0.02  | 65.66 | $5^8T_{2g}$ | 22.06 | $6^8T_{1g}$ |       |             |
| 37                                                                       | $\Gamma_{6g}$ | 2.900 | 196 | 44146 | 0.03  | 64.00 | $6^8T_{1g}$ | 33.66 | $5^8T_{2g}$ |       |             |
| 74                                                                       | $\Gamma_{8g}$ | 2.923 | 165 | 44269 | 0.05  | 51.39 | $5^8T_{2g}$ | 48.21 | $6^8T_{1g}$ |       |             |
| 75                                                                       | $\Gamma_{8g}$ | 2.900 | 196 | 44366 | 0.03  | 47.21 | $5^8T_{2g}$ | 30.26 | $6^8T_{1g}$ |       |             |
| 37                                                                       | $\Gamma_{7g}$ | 2.900 | 196 | 44393 | 0.03  | 62.84 | $6^8T_{1g}$ |       |             |       |             |
| 76                                                                       | $\Gamma_{8g}$ | 2.900 | 196 | 45483 | 0.07  | 63.24 | $6^8T_{1g}$ | 36.74 | $5^8T_{2g}$ |       |             |

|    |               |       |     |       |      |       |             |       |             |
|----|---------------|-------|-----|-------|------|-------|-------------|-------|-------------|
| 38 | $\Gamma_{7g}$ | 2.900 | 196 | 45497 | 0.03 | 54.77 | $6^8T_{1g}$ | 45.16 | $5^8T_{2g}$ |
| 39 | $\Gamma_{7g}$ | 2.900 | 196 | 45767 | 0.01 | 39.37 | $5^8T_{2g}$ | 24.16 | $6^8T_{1g}$ |
| 77 | $\Gamma_{8g}$ | 2.900 | 196 | 45796 | 0.02 | 44.11 | $5^8T_{2g}$ | 17.93 | $6^8T_{1g}$ |
| 38 | $\Gamma_{6g}$ | 2.900 | 196 | 45833 | 0.01 | 45.67 | $5^8T_{2g}$ | 13.52 | $6^8T_{1g}$ |

 $4f^7$  excited states $4f^7(^6P_{3/2,5/2,7/2})^c$ 

|   |               |       |     |       |  |       |             |       |             |
|---|---------------|-------|-----|-------|--|-------|-------------|-------|-------------|
| 2 | $\Gamma_{7u}$ | 3.080 | 203 | 30281 |  | 88.99 | $1^6T_{1u}$ |       |             |
| 2 | $\Gamma_{8u}$ | 3.080 | 203 | 30304 |  | 89.34 | $1^6T_{1u}$ |       |             |
| 3 | $\Gamma_{8u}$ | 3.080 | 203 | 30683 |  | 93.91 | $1^6T_{1u}$ |       |             |
| 2 | $\Gamma_{6u}$ | 3.080 | 203 | 30916 |  | 84.52 | $1^6T_{1u}$ | 12.66 | $3^6T_{2u}$ |
| 4 | $\Gamma_{8u}$ | 3.080 | 203 | 30932 |  | 84.77 | $1^6T_{1u}$ |       |             |
| 3 | $\Gamma_{7u}$ | 3.080 | 203 | 30956 |  | 85.07 | $1^6T_{1u}$ | 10.96 | $2^6E_u$    |

 $4f^7(^6I_{7/2,9/2,11/2,13/2,15/2,17/2})^c$ 

|    |               |       |     |       |  |       |             |       |                                                 |
|----|---------------|-------|-----|-------|--|-------|-------------|-------|-------------------------------------------------|
| 5  | $\Gamma_{8u}$ | 3.079 | 202 | 34795 |  | 79.07 | $1^6T_{2u}$ | 14.66 | $1^6E_u$                                        |
| 3  | $\Gamma_{6u}$ | 3.079 | 202 | 34796 |  | 78.81 | $1^6T_{2u}$ | 19.44 | $1^6E_u$                                        |
| 6  | $\Gamma_{8u}$ | 3.078 | 202 | 34800 |  | 86.14 | $1^6T_{2u}$ |       |                                                 |
| 4  | $\Gamma_{6u}$ | 3.078 | 202 | 34809 |  | 87.45 | $1^6T_{2u}$ |       |                                                 |
| 7  | $\Gamma_{8u}$ | 3.078 | 202 | 34812 |  | 91.39 | $1^6T_{2u}$ |       |                                                 |
| 4  | $\Gamma_{7u}$ | 3.079 | 202 | 34812 |  | 87.59 | $1^6T_{2u}$ |       |                                                 |
| 8  | $\Gamma_{8u}$ | 3.080 | 202 | 34873 |  | 48.84 | $2^6T_{1u}$ | 38.40 | $1^6A_{1u}$                                     |
| 5  | $\Gamma_{7u}$ | 3.080 | 202 | 34874 |  | 42.19 | $2^6T_{1u}$ | 27.53 | $1^6A_{1u}$ 23.10 $2^6T_{2u}$                   |
| 9  | $\Gamma_{8u}$ | 3.080 | 202 | 34909 |  | 51.85 | $2^6T_{1u}$ | 41.96 | $2^6T_{2u}$                                     |
| 5  | $\Gamma_{6u}$ | 3.080 | 202 | 34924 |  | 49.82 | $2^6T_{1u}$ | 46.61 | $2^6T_{2u}$                                     |
| 6  | $\Gamma_{7u}$ | 3.080 | 202 | 34949 |  | 41.27 | $2^6T_{1u}$ | 30.98 | $2^6T_{2u}$ 20.89 $1^6A_{1u}$                   |
| 10 | $\Gamma_{8u}$ | 3.080 | 202 | 34952 |  | 74.30 | $2^6T_{1u}$ | 19.06 | $2^6T_{2u}$                                     |
| 6  | $\Gamma_{6u}$ | 3.080 | 202 | 34997 |  | 87.52 | $2^6T_{2u}$ |       |                                                 |
| 7  | $\Gamma_{7u}$ | 3.080 | 202 | 35009 |  | 29.47 | $2^6T_{1u}$ | 26.55 | $1^6E_u$ 22.48 $2^6T_{2u}$ 21.05 $1^6A_{1u}$    |
| 11 | $\Gamma_{8u}$ | 3.080 | 202 | 35042 |  | 40.56 | $2^6T_{2u}$ | 32.44 | $1^6E_u$ 11.37 $1^6A_{2u}$                      |
| 12 | $\Gamma_{8u}$ | 3.080 | 202 | 35068 |  | 39.72 | $2^6T_{2u}$ | 37.93 | $2^6T_{1u}$ 16.69 $1^6A_{1u}$                   |
| 13 | $\Gamma_{8u}$ | 3.080 | 202 | 35083 |  | 63.09 | $1^6E_u$    | 15.91 | $2^6T_{2u}$                                     |
| 8  | $\Gamma_{7u}$ | 3.080 | 202 | 35084 |  | 65.14 | $1^6E_u$    | 28.57 | $2^6T_{1u}$                                     |
| 14 | $\Gamma_{8u}$ | 3.080 | 202 | 35125 |  | 35.50 | $1^6E_u$    | 21.02 | $2^6T_{2u}$ 15.35 $2^6T_{1u}$ 15.26 $1^6A_{2u}$ |
|    |               |       |     |       |  | 10.54 | $1^6A_{1u}$ |       |                                                 |
| 7  | $\Gamma_{6u}$ | 3.080 | 202 | 35141 |  | 33.24 | $1^6A_{2u}$ | 29.30 | $1^6E_u$ 20.11 $2^6T_{2u}$ 11.18 $2^6T_{1u}$    |
| 8  | $\Gamma_{6u}$ | 3.080 | 202 | 35223 |  | 48.83 | $1^6E_u$    | 16.17 | $2^6T_{2u}$ 15.26 $1^6T_{2u}$ 12.43 $1^6A_{2u}$ |
| 9  | $\Gamma_{7u}$ | 3.080 | 202 | 35223 |  | 49.12 | $2^6T_{1u}$ | 26.67 | $1^6A_{1u}$ 21.63 $2^6T_{2u}$                   |
| 15 | $\Gamma_{8u}$ | 3.080 | 202 | 35238 |  | 27.75 | $2^6T_{2u}$ | 26.53 | $1^6E_u$ 21.60 $2^6T_{1u}$                      |
| 16 | $\Gamma_{8u}$ | 3.080 | 202 | 35258 |  | 46.18 | $1^6A_{2u}$ | 20.46 | $2^6T_{2u}$ 13.35 $2^6T_{1u}$                   |
| 17 | $\Gamma_{8u}$ | 3.080 | 202 | 35266 |  | 61.08 | $2^6T_{2u}$ | 13.43 | $2^6T_{1u}$ 11.62 $1^6A_{2u}$                   |
| 9  | $\Gamma_{6u}$ | 3.080 | 202 | 35268 |  | 44.97 | $1^6A_{2u}$ | 28.13 | $2^6T_{2u}$ 19.32 $2^6T_{1u}$                   |

 $4f^7(^6D_{1/2,3/2,5/2,7/2})^c$ 

|    |               |       |     |       |  |       |             |       |                               |
|----|---------------|-------|-----|-------|--|-------|-------------|-------|-------------------------------|
| 10 | $\Gamma_{6u}$ | 3.079 | 202 | 37397 |  | 72.40 | $3^6T_{2u}$ | 24.72 | $2^6E_u$                      |
| 18 | $\Gamma_{8u}$ | 3.079 | 202 | 37421 |  | 59.19 | $3^6T_{2u}$ | 37.52 | $2^6E_u$                      |
| 19 | $\Gamma_{8u}$ | 3.079 | 202 | 37454 |  | 73.35 | $3^6T_{2u}$ | 23.51 | $2^6E_u$                      |
| 11 | $\Gamma_{6u}$ | 3.079 | 202 | 37659 |  | 67.62 | $2^6E_u$    | 31.65 | $3^6T_{2u}$                   |
| 20 | $\Gamma_{8u}$ | 3.079 | 202 | 37956 |  | 55.24 | $3^6T_{2u}$ | 37.08 | $2^6E_u$                      |
| 10 | $\Gamma_{7u}$ | 3.079 | 202 | 38180 |  | 85.12 | $3^6T_{2u}$ | 11.22 | $1^6T_{1u}$                   |
| 21 | $\Gamma_{8u}$ | 3.079 | 202 | 38239 |  | 57.43 | $3^6T_{2u}$ | 28.25 | $2^6E_u$ 11.22 $1^6T_{1u}$    |
| 12 | $\Gamma_{6u}$ | 3.079 | 202 | 38262 |  | 78.00 | $3^6T_{2u}$ | 13.11 | $1^6T_{1u}$                   |
| 22 | $\Gamma_{8u}$ | 3.079 | 202 | 38307 |  | 55.71 | $2^6E_u$    | 28.60 | $3^6T_{2u}$ 12.09 $1^6T_{1u}$ |
| 11 | $\Gamma_{7u}$ | 3.079 | 202 | 38317 |  | 83.13 | $2^6E_u$    | 12.32 | $1^6T_{1u}$                   |

 $\text{Eu}^{3+}$ -doped BaS $4f^6(^7F_{0-6})$ 

|   |          |       |     |     |  |       |             |       |             |       |             |
|---|----------|-------|-----|-----|--|-------|-------------|-------|-------------|-------|-------------|
| 1 | $A_{1g}$ | 2.800 | 286 | 0   |  | 47.13 | $1^7T_{1g}$ | 36.92 | $1^7T_{2g}$ | 10.12 | $1^7A_{2g}$ |
| 1 | $T_{1g}$ | 2.800 | 286 | 373 |  | 49.18 | $1^7T_{1g}$ | 36.47 | $1^7T_{2g}$ |       |             |
| 1 | $E_g$    | 2.799 | 285 | 963 |  | 67.33 | $1^7T_{1g}$ | 29.01 | $1^7T_{2g}$ |       |             |

|                                      |       |     |       |       |             |       |             |       |             |       |             |
|--------------------------------------|-------|-----|-------|-------|-------------|-------|-------------|-------|-------------|-------|-------------|
| 1 $T_{2g}$                           | 2.800 | 287 | 1137  | 42.70 | 1 $7T_{1g}$ | 39.80 | 1 $7T_{2g}$ | 13.86 | 1 $7A_{2g}$ |       |             |
| 1 $A_{2g}$                           | 2.799 | 285 | 1956  | 54.65 | 1 $7T_{1g}$ | 42.86 | 1 $7T_{2g}$ |       |             |       |             |
| 2 $T_{2g}$                           | 2.800 | 287 | 2017  | 46.15 | 1 $7T_{1g}$ | 32.05 | 1 $7T_{2g}$ | 19.23 | 1 $7A_{2g}$ |       |             |
| 2 $T_{1g}$                           | 2.800 | 287 | 2066  | 46.60 | 1 $7T_{2g}$ | 36.54 | 1 $7T_{1g}$ | 14.32 | 1 $7A_{2g}$ |       |             |
| 3 $T_{2g}$                           | 2.799 | 286 | 2951  | 70.46 | 1 $7T_{1g}$ | 23.92 | 1 $7T_{2g}$ |       |             |       |             |
| 2 $E_g$                              | 2.800 | 285 | 3170  | 74.60 | 1 $7T_{2g}$ | 23.36 | 1 $7T_{1g}$ |       |             |       |             |
| 3 $T_{1g}$                           | 2.800 | 288 | 3190  | 43.79 | 1 $7T_{2g}$ | 29.53 | 1 $7T_{1g}$ | 24.61 | 1 $7A_{2g}$ |       |             |
| 2 $A_{1g}$                           | 2.800 | 291 | 3211  | 50.44 | 1 $7A_{2g}$ | 37.56 | 1 $7T_{1g}$ |       |             |       |             |
| 4 $T_{1g}$                           | 2.799 | 286 | 4184  | 52.40 | 1 $7T_{1g}$ | 42.78 | 1 $7T_{2g}$ |       |             |       |             |
| 3 $E_g$                              | 2.799 | 285 | 4216  | 51.01 | 1 $7T_{2g}$ | 46.64 | 1 $7T_{1g}$ |       |             |       |             |
| 4 $T_{2g}$                           | 2.800 | 288 | 4247  | 62.26 | 1 $7T_{1g}$ | 25.79 | 1 $7A_{2g}$ |       |             |       |             |
| 5 $T_{1g}$                           | 2.800 | 287 | 4400  | 74.15 | 1 $7T_{2g}$ | 12.01 | 1 $7T_{1g}$ | 11.47 | 1 $7A_{2g}$ |       |             |
| 4 $E_g$                              | 2.799 | 285 | 5387  | 56.56 | 1 $7T_{1g}$ | 40.14 | 1 $7T_{2g}$ |       |             |       |             |
| 5 $T_{2g}$                           | 2.799 | 286 | 5407  | 52.28 | 1 $7T_{1g}$ | 43.48 | 1 $7T_{2g}$ |       |             |       |             |
| 2 $A_{2g}$                           | 2.799 | 285 | 5457  | 54.22 | 1 $7T_{2g}$ | 42.46 | 1 $7T_{1g}$ |       |             |       |             |
| 6 $T_{2g}$                           | 2.800 | 289 | 5619  | 45.05 | 1 $7T_{2g}$ | 33.67 | 1 $7A_{2g}$ | 17.99 | 1 $7T_{1g}$ |       |             |
| 6 $T_{1g}$                           | 2.800 | 289 | 5650  | 47.57 | 1 $7T_{2g}$ | 34.76 | 1 $7A_{2g}$ | 14.36 | 1 $7T_{1g}$ |       |             |
| 3 $A_{1g}$                           | 2.800 | 290 | 5676  | 48.77 | 1 $7T_{2g}$ | 36.45 | 1 $7A_{2g}$ | 11.47 | 1 $7T_{1g}$ |       |             |
| $4f^6(^5D_{0-3})$                    |       |     |       |       |             |       |             |       |             |       |             |
| 4 $A_{1g}$                           | 2.798 | 285 | 19973 | 57.46 | 1 $5T_{2g}$ | 36.83 | 1 $5E_g$    |       |             |       |             |
| 7 $T_{1g}$                           | 2.798 | 285 | 20781 | 58.04 | 1 $5T_{2g}$ | 36.80 | 1 $5E_g$    |       |             |       |             |
| 7 $T_{2g}$                           | 2.797 | 285 | 22428 | 70.36 | 1 $5T_{2g}$ | 25.21 | 1 $5E_g$    |       |             |       |             |
| 5 $E_g$                              | 2.798 | 284 | 22521 | 54.04 | 1 $5E_g$    | 41.47 | 1 $5T_{2g}$ |       |             |       |             |
| 8 $T_{1g}$                           | 2.797 | 285 | 25111 | 85.65 | 1 $5T_{2g}$ | 10.04 | 1 $5E_g$    |       |             |       |             |
| 8 $T_{2g}$                           | 2.797 | 285 | 25153 | 49.90 | 1 $5E_g$    | 45.77 | 1 $5T_{2g}$ |       |             |       |             |
| 3 $A_{2g}$                           | 2.797 | 284 | 25190 | 95.44 | 1 $5E_g$    |       |             |       |             |       |             |
| $4f^6(^5D_4, ^5L_{6-10}, ^5G_{2-6})$ |       |     |       |       |             |       |             |       |             |       |             |
| 9 $T_{2g}$                           | 2.797 | 285 | 28323 | 21.94 | 1 $5T_{1g}$ | 20.69 | 2 $5E_g$    | 16.46 | 4 $5T_{2g}$ | 14.24 | 2 $5T_{1g}$ |
| 5 $A_{1g}$                           | 2.797 | 284 | 28343 | 51.00 | 3 $5T_{2g}$ | 34.25 | 3 $5E_g$    | 11.53 | 4 $5T_{2g}$ |       |             |
| 4 $A_{2g}$                           | 2.797 | 285 | 28345 | 36.80 | 1 $5T_{1g}$ | 35.07 | 2 $5E_g$    | 14.96 | 2 $5T_{1g}$ |       |             |
| 9 $T_{1g}$                           | 2.797 | 284 | 28362 | 31.55 | 3 $5T_{2g}$ | 14.41 | 3 $5E_g$    | 13.19 | 2 $5T_{1g}$ | 11.83 | 1 $5T_{1g}$ |
|                                      |       |     |       | 10.75 | 4 $5T_{2g}$ |       |             |       |             |       |             |
| 10 $T_{2g}$                          | 2.797 | 284 | 28494 | 43.66 | 1 $5T_{1g}$ | 16.42 | 2 $5E_g$    | 10.07 | 4 $5T_{1g}$ |       |             |
| 11 $T_{2g}$                          | 2.797 | 285 | 28495 | 42.72 | 1 $5T_{1g}$ | 25.53 | 1 $5A_{1g}$ |       |             |       |             |
| 6 $E_g$                              | 2.797 | 285 | 28536 | 45.16 | 1 $5T_{1g}$ | 22.35 | 1 $5A_{1g}$ | 18.14 | 2 $5E_g$    |       |             |
| 12 $T_{2g}$                          | 2.797 | 285 | 28572 | 32.46 | 4 $5T_{2g}$ | 15.97 | 1 $5T_{1g}$ | 14.79 | 2 $5E_g$    |       |             |
| 10 $T_{1g}$                          | 2.797 | 285 | 28618 | 43.04 | 1 $5T_{1g}$ | 23.45 | 2 $5T_{2g}$ |       |             |       |             |
| 7 $E_g$                              | 2.797 | 284 | 28625 | 21.65 | 3 $5T_{2g}$ | 17.24 | 3 $5T_{1g}$ | 16.86 | 2 $5T_{1g}$ | 13.51 | 4 $5E_g$    |
|                                      |       |     |       | 13.26 | 4 $5T_{2g}$ |       |             |       |             |       |             |
| 13 $T_{2g}$                          | 2.797 | 283 | 28629 | 22.30 | 3 $5T_{1g}$ | 17.04 | 2 $5T_{1g}$ | 16.91 | 3 $5T_{1g}$ | 13.25 | 4 $5E_g$    |
|                                      |       |     |       | 12.24 | 4 $5T_{2g}$ |       |             |       |             |       |             |
| 6 $A_{1g}$                           | 2.797 | 281 | 28703 | 61.44 | 2 $5E_g$    | 14.13 | 2 $5T_{2g}$ | 13.04 | 5 $5T_{2g}$ |       |             |
| 8 $E_g$                              | 2.798 | 284 | 28706 | 32.23 | 3 $5T_{1g}$ | 17.07 | 4 $5T_{2g}$ | 17.02 | 4 $5E_g$    | 11.43 | 2 $5A_{1g}$ |
| 5 $A_{2g}$                           | 2.798 | 284 | 28715 | 42.37 | 2 $5T_{1g}$ | 20.16 | 4 $5E_g$    | 11.33 | 2 $5E_g$    | 10.61 | 3 $5E_g$    |
| 14 $T_{2g}$                          | 2.798 | 284 | 28825 | 75.92 | 2 $5T_{2g}$ |       |             |       |             |       |             |
| 11 $T_{1g}$                          | 2.797 | 285 | 28934 | 19.48 | 3 $5T_{2g}$ | 19.11 | 2 $5T_{1g}$ | 11.08 | 1 $5E_g$    | 10.83 | 1 $5T_{2g}$ |
| 7 $A_{1g}$                           | 2.797 | 284 | 28954 | 55.22 | 1 $5E_g$    | 35.33 | 1 $5T_{2g}$ |       |             |       |             |
| 9 $E_g$                              | 2.797 | 284 | 29001 | 29.36 | 3 $5E_g$    | 17.87 | 2 $5T_{2g}$ | 12.75 | 2 $5T_{1g}$ | 11.80 | 4 $5T_{2g}$ |
| 12 $T_{1g}$                          | 2.797 | 285 | 29015 | 30.02 | 1 $5E_g$    | 29.87 | 1 $5T_{2g}$ | 12.65 | 2 $5T_{2g}$ |       |             |
| 15 $T_{2g}$                          | 2.797 | 284 | 29029 | 28.53 | 3 $5T_{2g}$ | 14.21 | 2 $5T_{1g}$ | 12.61 | 4 $5T_{2g}$ | 11.17 | 4 $5E_g$    |
| 10 $E_g$                             | 2.797 | 284 | 29066 | 38.73 | 1 $5T_{2g}$ | 29.03 | 1 $5E_g$    | 12.20 | 2 $5E_g$    |       |             |
| 16 $T_{2g}$                          | 2.798 | 285 | 29110 | 51.85 | 1 $5T_{2g}$ | 13.39 | 1 $5E_g$    | 11.34 | 2 $5T_{2g}$ |       |             |
| 17 $T_{2g}$                          | 2.797 | 285 | 29122 | 33.57 | 2 $5E_g$    | 22.85 | 1 $5T_{1g}$ | 10.95 | 2 $5T_{2g}$ | 10.05 | 5 $5T_{2g}$ |
| 18 $T_{2g}$                          | 2.797 | 285 | 29131 | 21.75 | 1 $5T_{1g}$ | 20.33 | 1 $5A_{1g}$ | 15.08 | 2 $5T_{2g}$ |       |             |
| 13 $T_{1g}$                          | 2.797 | 283 | 29188 | 25.95 | 4 $5T_{2g}$ | 23.24 | 4 $5E_g$    | 19.51 | 3 $5T_{1g}$ |       |             |
| 6 $A_{2g}$                           | 2.797 | 285 | 29207 | 44.48 | 3 $5T_{1g}$ | 23.59 | 3 $5E_g$    | 22.51 | 4 $5E_g$    |       |             |
| 11 $E_g$                             | 2.797 | 284 | 29226 | 46.55 | 2 $5T_{2g}$ | 12.68 | 3 $5E_g$    |       |             |       |             |
| 14 $T_{1g}$                          | 2.798 | 285 | 29239 | 39.81 | 2 $5T_{2g}$ | 11.93 | 1 $5T_{1g}$ |       |             |       |             |
| 19 $T_{2g}$                          | 2.798 | 284 | 29250 | 29.67 | 3 $5T_{1g}$ | 19.79 | 2 $5A_{1g}$ | 19.09 | 2 $5T_{1g}$ | 10.73 | 3 $5E_g$    |
| 12 $E_g$                             | 2.797 | 285 | 29690 | 55.48 | 3 $5T_{2g}$ | 18.63 | 2 $5T_{1g}$ | 11.21 | 4 $5T_{2g}$ |       |             |
| 20 $T_{2g}$                          | 2.797 | 285 | 29716 | 30.57 | 2 $5T_{1g}$ | 29.09 | 3 $5E_g$    | 13.62 | 4 $5T_{2g}$ |       |             |

|             |       |     |       |       |             |       |             |       |             |       |             |
|-------------|-------|-----|-------|-------|-------------|-------|-------------|-------|-------------|-------|-------------|
| 15 $T_{1g}$ | 2.797 | 284 | 29792 | 25.37 | 3 $5T_{2g}$ | 21.47 | 4 $5T_{2g}$ | 13.16 | 2 $5T_{1g}$ | 12.96 | 3 $5E_g$    |
|             |       |     |       | 12.61 | 4 $5E_g$    |       |             |       |             |       |             |
| 21 $T_{2g}$ | 2.797 | 285 | 29886 | 37.77 | 3 $5T_{1g}$ | 13.78 | 4 $5T_{2g}$ | 12.81 | 4 $5E_g$    | 10.21 | 3 $5T_{2g}$ |
| 16 $T_{1g}$ | 2.798 | 284 | 29907 | 45.98 | 3 $5T_{1g}$ | 25.36 | 2 $5T_{1g}$ | 17.30 | 4 $5T_{2g}$ |       |             |
| 8 $A_{1g}$  | 2.797 | 285 | 29956 | 55.57 | 4 $5E_g$    | 21.20 | 4 $5T_{2g}$ | 16.77 | 3 $5T_{2g}$ |       |             |
| 13 $E_g$    | 2.797 | 283 | 30010 | 20.58 | 1 $5T_{1g}$ | 15.63 | 2 $5A_{1g}$ | 12.25 | 4 $5E_g$    |       |             |
| 22 $T_{2g}$ | 2.797 | 284 | 30049 | 14.01 | 1 $5T_{1g}$ | 13.06 | 2 $5A_{1g}$ | 12.20 | 1 $5A_{1g}$ | 11.63 | 2 $5T_{1g}$ |
| 14 $E_g$    | 2.797 | 285 | 30050 | 35.89 | 1 $5T_{1g}$ | 23.50 | 2 $5E_g$    | 13.78 | 1 $5A_{1g}$ |       |             |
| 7 $A_{2g}$  | 2.797 | 285 | 30087 | 38.07 | 1 $5T_{1g}$ | 35.69 | 2 $5E_g$    | 12.27 | 4 $5T_{1g}$ |       |             |
| 9 $A_{1g}$  | 2.797 | 284 | 30209 | 59.14 | 2 $5T_{2g}$ | 15.13 | 5 $5E_g$    | 14.91 | 2 $5E_g$    |       |             |
| 17 $T_{1g}$ | 2.797 | 285 | 30209 | 53.06 | 2 $5T_{2g}$ |       |             |       |             |       |             |
| 23 $T_{2g}$ | 2.798 | 284 | 30233 | 46.73 | 2 $5T_{2g}$ | 12.48 | 1 $5T_{1g}$ | 12.34 | 5 $5T_{1g}$ |       |             |
| 8 $A_{2g}$  | 2.797 | 285 | 30652 | 42.03 | 3 $5T_{2g}$ | 24.71 | 4 $5T_{2g}$ | 22.18 | 2 $5T_{1g}$ |       |             |
| 18 $T_{1g}$ | 2.797 | 285 | 30653 | 42.08 | 3 $5T_{2g}$ | 24.69 | 4 $5T_{2g}$ | 22.13 | 2 $5T_{1g}$ |       |             |
| 24 $T_{2g}$ | 2.797 | 285 | 30656 | 28.86 | 2 $5T_{1g}$ | 27.16 | 3 $5T_{2g}$ | 22.27 | 4 $5T_{2g}$ | 10.84 | 3 $5E_g$    |
| 10 $A_{1g}$ | 2.797 | 284 | 30738 | 32.22 | 3 $5E_g$    | 29.71 | 4 $5E_g$    | 28.59 | 3 $5T_{2g}$ |       |             |
| 19 $T_{1g}$ | 2.797 | 285 | 30751 | 40.27 | 3 $5T_{1g}$ | 21.82 | 4 $5T_{2g}$ | 13.84 | 3 $5E_g$    | 10.86 | 3 $5T_{2g}$ |
| 15 $E_g$    | 2.797 | 285 | 30819 | 28.81 | 4 $5E_g$    | 25.41 | 4 $5T_{2g}$ | 18.20 | 2 $5A_{1g}$ |       |             |
| 25 $T_{2g}$ | 2.798 | 284 | 30895 | 27.89 | 2 $5A_{1g}$ | 23.94 | 2 $5T_{1g}$ | 18.43 | 4 $5T_{2g}$ | 12.98 | 4 $5E_g$    |
|             |       |     |       | 10.47 | 3 $5T_{1g}$ |       |             |       |             |       |             |
| 20 $T_{1g}$ | 2.798 | 284 | 30926 | 42.40 | 3 $5T_{1g}$ | 38.25 | 4 $5E_g$    |       |             |       |             |
| 21 $T_{1g}$ | 2.797 | 285 | 31709 | 56.79 | 3 $5T_{2g}$ | 20.63 | 3 $5E_g$    | 11.73 | 2 $5T_{1g}$ |       |             |
| 16 $E_g$    | 2.797 | 285 | 31757 | 30.99 | 3 $5T_{2g}$ | 29.07 | 2 $5T_{1g}$ | 28.90 | 3 $5E_g$    |       |             |
| 22 $T_{1g}$ | 2.797 | 285 | 31772 | 35.81 | 2 $5T_{1g}$ | 26.96 | 3 $5E_g$    | 17.68 | 3 $5T_{2g}$ | 10.42 | 4 $5T_{2g}$ |
| 11 $A_{1g}$ | 2.797 | 285 | 31812 | 61.93 | 4 $5T_{2g}$ | 26.16 | 3 $5E_g$    | 10.33 | 4 $5E_g$    |       |             |
| 23 $T_{1g}$ | 2.797 | 285 | 31856 | 38.21 | 4 $5T_{2g}$ | 24.23 | 2 $5T_{1g}$ | 14.89 | 4 $5E_g$    | 13.27 | 3 $5T_{1g}$ |
| 26 $T_{2g}$ | 2.797 | 285 | 31897 | 34.64 | 4 $5T_{2g}$ | 29.53 | 3 $5T_{1g}$ | 11.77 | 4 $5E_g$    |       |             |
| 9 $A_{2g}$  | 2.798 | 284 | 32058 | 51.10 | 4 $5E_g$    | 36.67 | 3 $5T_{1g}$ | 11.99 | 2 $5T_{1g}$ |       |             |
| 27 $T_{2g}$ | 2.798 | 284 | 32094 | 40.56 | 3 $5T_{1g}$ | 26.56 | 4 $5E_g$    | 24.33 | 2 $5A_{1g}$ |       |             |
| 17 $E_g$    | 2.798 | 284 | 32106 | 40.50 | 3 $5T_{1g}$ | 30.54 | 2 $5A_{1g}$ | 21.63 | 4 $5E_g$    |       |             |

<sup>a</sup> Absorption oscillator strengths for  $1 \Gamma_{6u,8u,7u} \rightarrow i$  transitions are calculated at  $d_{\text{Eu-F}} = 3.100 \text{ \AA}$ ; the reference value is  $f_{ref} = 1.906 \times 10^{-3}$ . Emission oscillator strengths for  $1 \Gamma_{8g} \rightarrow 1 \Gamma_{6u,1} \Gamma_{8u,1} \Gamma_{7u}$  and radiative emission lifetime are calculated at  $d_{\text{Eu-F}} = 3.050 \text{ \AA}$ ; the reference value is  $f_{ref} = 8.969 \times 10^{-4}$ .

<sup>b</sup> The analyses of the wave functions have been done at  $d_{\text{Eu-F}} = 3.100 \text{ \AA}$  ( $4f^7$ ),  $3.100 \text{ \AA}$  ( $4f^6(5d^1 + 6sa_{1g}^1)$ ),  $2.850 \text{ \AA}$  ( $4f^6$ ).

<sup>c</sup> C.f. Table S7.

<sup>d</sup> C.f. Table S8.

TABLE S15: Comparison between calculated and experimental excitation energies. For the lowest  $4f^6 5d^1$  state of  $\text{Eu}^{2+}$ , zero-phonon lines (ZPL) were visible in low temperature emission or excitation spectra in most cases, except for the  $\text{BaF}_2$  and  $\text{BaS}$  hosts. In the latter two cases, the ZPL location was estimated (shown in *italic*). Energies given in  $\text{cm}^{-1}$ .

|             | $E_{\text{calc}}$             | $E_{\text{exp}}$ | diff. |             | $E_{\text{calc}}$             | $E_{\text{exp}}$ | diff. |             | $E_{\text{calc}}$             | $E_{\text{exp}}$ | diff.           |       |              |             |
|-------------|-------------------------------|------------------|-------|-------------|-------------------------------|------------------|-------|-------------|-------------------------------|------------------|-----------------|-------|--------------|-------------|
|             | $\text{CaF}_2:\text{Eu}^{2+}$ |                  |       |             | $\text{SrF}_2:\text{Eu}^{2+}$ |                  |       |             | $\text{BaF}_2:\text{Eu}^{2+}$ |                  |                 |       |              |             |
| $4f^7$      |                               | Ref. 32          |       | $4f^7$      |                               | Ref. 32          |       | $4f^7$      |                               | Ref. 33          |                 |       |              |             |
| $^8S$       |                               | 0                | 0     | $^8S$       |                               | 0                | 0     | $^8S$       |                               | 0                | 0               |       |              |             |
| $^6P$       | 2 $\Gamma_{8u}$               | 30442            | 27558 | 2884        | $^6P$                         | 2 $\Gamma_{8u}$  | 30577 | 27654       | 2923                          | $^6P$            | 2 $\Gamma_{8u}$ | 30809 | 27727        | 3082        |
|             | 2 $\Gamma_{7u}$               | 30453            | 27564 | 2889        |                               | 2 $\Gamma_{7u}$  | 30585 | 27658       | 2927                          |                  | 2 $\Gamma_{7u}$ | 30815 | 27729        | 3086        |
|             | 3 $\Gamma_{8u}$               | 30826            | 27588 | 3238        |                               | 3 $\Gamma_{8u}$  | 30962 | 27672       | 3290                          |                  | 3 $\Gamma_{8u}$ | 31194 | 27738        | 3456        |
|             | 2 $\Gamma_{6u}$               | 31053            | 27959 | 3094        |                               | 2 $\Gamma_{6u}$  | 31194 | 28066       | 3128                          |                  |                 |       |              |             |
|             | 4 $\Gamma_{8u}$               | 31065            | 27999 | 3066        |                               | 4 $\Gamma_{8u}$  | 31205 | 28098       | 3107                          |                  |                 |       |              |             |
| $^6I$       | 3 $\Gamma_{6u}$               | 34758            | 30760 | 3998        | $^6I$                         | 3 $\Gamma_{6u}$  | 34938 | 30887       | 4051                          |                  |                 |       |              |             |
|             | 5 $\Gamma_{8u}$               | 34766            | 30880 | 3886        |                               | 5 $\Gamma_{8u}$  | 34945 | 31000       | 3945                          |                  |                 |       |              |             |
|             | 6 $\Gamma_{8u}$               | 34798            | 31057 | 3741        |                               | 4 $\Gamma_{6u}$  | 34989 | 31210       | 3779                          |                  |                 |       |              |             |
|             | 7 $\Gamma_{8u}$               | 34807            | 31107 | 3700        |                               | 5 $\Gamma_{6u}$  | 35261 | 31407       | 3854                          |                  |                 |       |              |             |
|             | 8 $\Gamma_{8u}$               | 35033            | 31296 | 3737        |                               | 6 $\Gamma_{7u}$  | 35315 | 31450       | 3865                          |                  |                 |       |              |             |
|             | 10 $\Gamma_{8u}$              | 35172            | 31318 | 3854        |                               | 6 $\Gamma_{6u}$  | 35317 | 31479       | 3838                          |                  |                 |       |              |             |
|             | 5 $\Gamma_{7u}$               | 35182            | 31371 | 3811        |                               | 2 $\Gamma_{8u}$  | 35356 | 31526       | 3830                          |                  |                 |       |              |             |
|             | 6 $\Gamma_{7u}$               | 35210            | 31433 | 3777        |                               | 7 $\Gamma_{6u}$  | 35362 | 31561       | 3801                          |                  |                 |       |              |             |
|             | 12 $\Gamma_{8u}$              | 35213            | 31446 | 3767        |                               | 7 $\Gamma_{7u}$  | 35382 | 31590       | 3792                          |                  |                 |       |              |             |
|             | 7 $\Gamma_{7u}$               | 35242            | 31485 | 3757        |                               | 3 $\Gamma_{8u}$  | 35405 | 31610       | 3795                          |                  |                 |       |              |             |
|             | 8 $\Gamma_{6u}$               | 35265            | 31513 | 3752        |                               | 8 $\Gamma_{6u}$  | 35414 | 31632       | 3782                          |                  |                 |       |              |             |
|             | 14 $\Gamma_{8u}$              | 35315            | 31540 | 3775        |                               | 8 $\Gamma_{7u}$  | 35442 | 31647       | 3795                          |                  |                 |       |              |             |
|             | 15 $\Gamma_{8u}$              | 35376            | 31653 | 3723        |                               | 5 $\Gamma_{8u}$  | 35499 | 31749       | 3750                          |                  |                 |       |              |             |
|             | 17 $\Gamma_{8u}$              | 35496            | 31710 | 3786        |                               | 9 $\Gamma_{6u}$  | 35590 | 31766       | 3824                          |                  |                 |       |              |             |
|             | 9 $\Gamma_{7u}$               | 35510            | 31748 | 3762        |                               | 9 $\Gamma_{6u}$  | 35590 | 31766       | 3824                          |                  |                 |       |              |             |
| $^6D$       | 10 $\Gamma_{6u}$              | 37633            | 33890 | 3743        | $^6D$                         | 9 $\Gamma_{7u}$  | 35633 | 31828       | 3805                          |                  |                 |       |              |             |
|             | 19 $\Gamma_{8u}$              | 37672            | 34010 | 3662        |                               | 10 $\Gamma_{6u}$ | 37811 | 33990       | 3821                          |                  |                 |       |              |             |
|             | 11 $\Gamma_{6u}$              | 37925            | 34503 | 3422        |                               | 19 $\Gamma_{8u}$ | 37829 | 34115       | 3714                          |                  |                 |       |              |             |
|             | 20 $\Gamma_{8u}$              | 38099            | 34620 | 3479        |                               | 20 $\Gamma_{8u}$ | 38276 | 34650       | 3626                          |                  |                 |       |              |             |
|             | 21 $\Gamma_{8u}$              | 38311            | 34685 | 3626        |                               | 21 $\Gamma_{8u}$ | 38489 | 34740       | 3749                          |                  |                 |       |              |             |
|             | 12 $\Gamma_{6u}$              | 38515            | 34785 | 3730        |                               | 10 $\Gamma_{7u}$ | 38557 | 34770       | 3787                          |                  |                 |       |              |             |
|             | 22 $\Gamma_{8u}$              | 38609            | 34950 | 3659        |                               | 12 $\Gamma_{6u}$ | 38667 | 34860       | 3807                          |                  |                 |       |              |             |
| $4f^6 5d^1$ |                               | Ref. 34          |       | $4f^6 5d^1$ |                               | Ref. 33          |       | $4f^6 5d^1$ |                               | Ref. 33          |                 |       |              |             |
|             | 1 $\Gamma_{8g}$               | 25720            | 24215 | 1505        |                               | 1 $\Gamma_{8g}$  | 26828 | 24925       | 1903                          |                  | 1 $\Gamma_{8g}$ | 28044 | <i>25636</i> | <i>2408</i> |
|             | $\text{CaF}_2:\text{Eu}^{3+}$ |                  |       |             | $\text{CaF}_2:\text{Eu}^{3+}$ |                  |       |             | $\text{CaF}_2:\text{Eu}^{3+}$ |                  |                 |       |              |             |
| $4f^6$      |                               | Ref. 35          |       | $4f^6$      |                               | Ref. 35          |       | $4f^6$      |                               | Ref. 35          |                 |       |              |             |
| $^7F_0$     | 1 $A_{1g}$                    | 0                | 0     | 0           | $^7F_0$                       | 1 $A_{1g}$       | 0     | 0           | 0                             | $^7F_0$          | 1 $A_{1g}$      | 0     | 0            | 0           |
| $^7F_1$     | 1 $T_{1g}$                    | 345              | 337   | 8           | $^7F_1$                       | 1 $T_{1g}$       | 345   | 337         | 8                             | $^7F_1$          | 1 $T_{1g}$      | 345   | 337          | 8           |
| $^7F_2$     | 1 $T_{2g}$                    | 803              | 811   | -8          | $^7F_2$                       | 1 $T_{2g}$       | 803   | 811         | -8                            | $^7F_2$          | 1 $T_{2g}$      | 803   | 811          | -8          |
|             | 1 $E_g$                       | 1406             | 1342  | 64          |                               | 1 $E_g$          | 1406  | 1342        | 64                            |                  | 1 $E_g$         | 1406  | 1342         | 64          |
| $^7F_3$     | 2 $T_{1g}$                    | 1971             | 1857  | 114         | $^7F_3$                       | 2 $T_{1g}$       | 1971  | 1857        | 114                           | $^7F_3$          | 2 $T_{1g}$      | 1971  | 1857         | 114         |
|             | 2 $T_{2g}$                    | 2111             | 1968  | 143         |                               | 2 $T_{2g}$       | 2111  | 1968        | 143                           |                  | 2 $T_{2g}$      | 2111  | 1968         | 143         |
|             | 1 $A_{2g}$                    | 2352             | 2107  | 245         |                               | 1 $A_{2g}$       | 2352  | 2107        | 245                           |                  | 1 $A_{2g}$      | 2352  | 2107         | 245         |
| $^7F_4$     | 2 $A_{1g}$                    | 2501             | 2845  | -344        | $^7F_4$                       | 2 $A_{1g}$       | 2501  | 2845        | -344                          | $^7F_4$          | 2 $A_{1g}$      | 2501  | 2845         | -344        |
|             | 3 $T_{1g}$                    | 3114             | 2879  | 235         |                               | 3 $T_{1g}$       | 3114  | 2879        | 235                           |                  | 3 $T_{1g}$      | 3114  | 2879         | 235         |
|             | 3 $T_{2g}$                    | 3361             | 3021  | 340         |                               | 3 $T_{2g}$       | 3361  | 3021        | 340                           |                  | 3 $T_{2g}$      | 3361  | 3021         | 340         |
|             | 2 $E_g$                       | 3472             | 3233  | 239         |                               | 2 $E_g$          | 3472  | 3233        | 239                           |                  | 2 $E_g$         | 3472  | 3233         | 239         |
| $^7F_5$     | 4 $T_{2g}$                    | 4132             | 3793  | 339         | $^7F_5$                       | 4 $T_{2g}$       | 4132  | 3793        | 339                           | $^7F_5$          | 4 $T_{2g}$      | 4132  | 3793         | 339         |
|             | 4 $T_{1g}$                    | 4404             | 3933  | 471         |                               | 4 $T_{1g}$       | 4404  | 3933        | 471                           |                  | 4 $T_{1g}$      | 4404  | 3933         | 471         |
|             | 3 $E_g$                       | 4600             | 4028  | 572         |                               | 3 $E_g$          | 4600  | 4028        | 572                           |                  | 3 $E_g$         | 4600  | 4028         | 572         |
|             | 5 $T_{1g}$                    | 4602             | 4438  | 164         |                               | 5 $T_{1g}$       | 4602  | 4438        | 164                           |                  | 5 $T_{1g}$      | 4602  | 4438         | 164         |
| $^7F_6$     | 3 $A_{1g}$                    | 5524             | 4920  | 604         | $^7F_6$                       | 3 $A_{1g}$       | 5524  | 4920        | 604                           | $^7F_6$          | 3 $A_{1g}$      | 5524  | 4920         | 604         |
|             | 6 $T_{1g}$                    | 5580             | 4946  | 634         |                               | 6 $T_{1g}$       | 5580  | 4946        | 634                           |                  | 6 $T_{1g}$      | 5580  | 4946         | 634         |
|             | 5 $T_{2g}$                    | 5603             | 5044  | 559         |                               | 5 $T_{2g}$       | 5603  | 5044        | 559                           |                  | 5 $T_{2g}$      | 5603  | 5044         | 559         |

|           |            |       |       |      |
|-----------|------------|-------|-------|------|
|           | 4 $E_g$    | 5806  | 5062  | 744  |
|           | 6 $T_{2g}$ | 5813  | 5184  | 629  |
|           | 2 $A_{2g}$ | 5827  | 5411  | 416  |
| ${}^5D_0$ | 4 $A_{1g}$ | 20023 | 17274 | 2749 |
| ${}^5D_1$ | 7 $T_{1g}$ | 20828 | 19030 | 1798 |

| CaS:Eu <sup>2+</sup> |       |         |      | SrS:Eu <sup>2+</sup> |       |         |      | BaS:Eu <sup>2+</sup> |       |            |
|----------------------|-------|---------|------|----------------------|-------|---------|------|----------------------|-------|------------|
| $4f^65d^1$           |       | Ref. 36 |      | $4f^65d^1$           |       | Ref. 37 |      | $4f^65d^1$           |       | Ref. 38    |
| 1 $\Gamma_{8g}$      | 17309 | 15995   | 1314 | 1 $\Gamma_{8g}$      | 18978 | 17191   | 1787 | 1 $\Gamma_{8g}$      | 20356 | 18729 1627 |

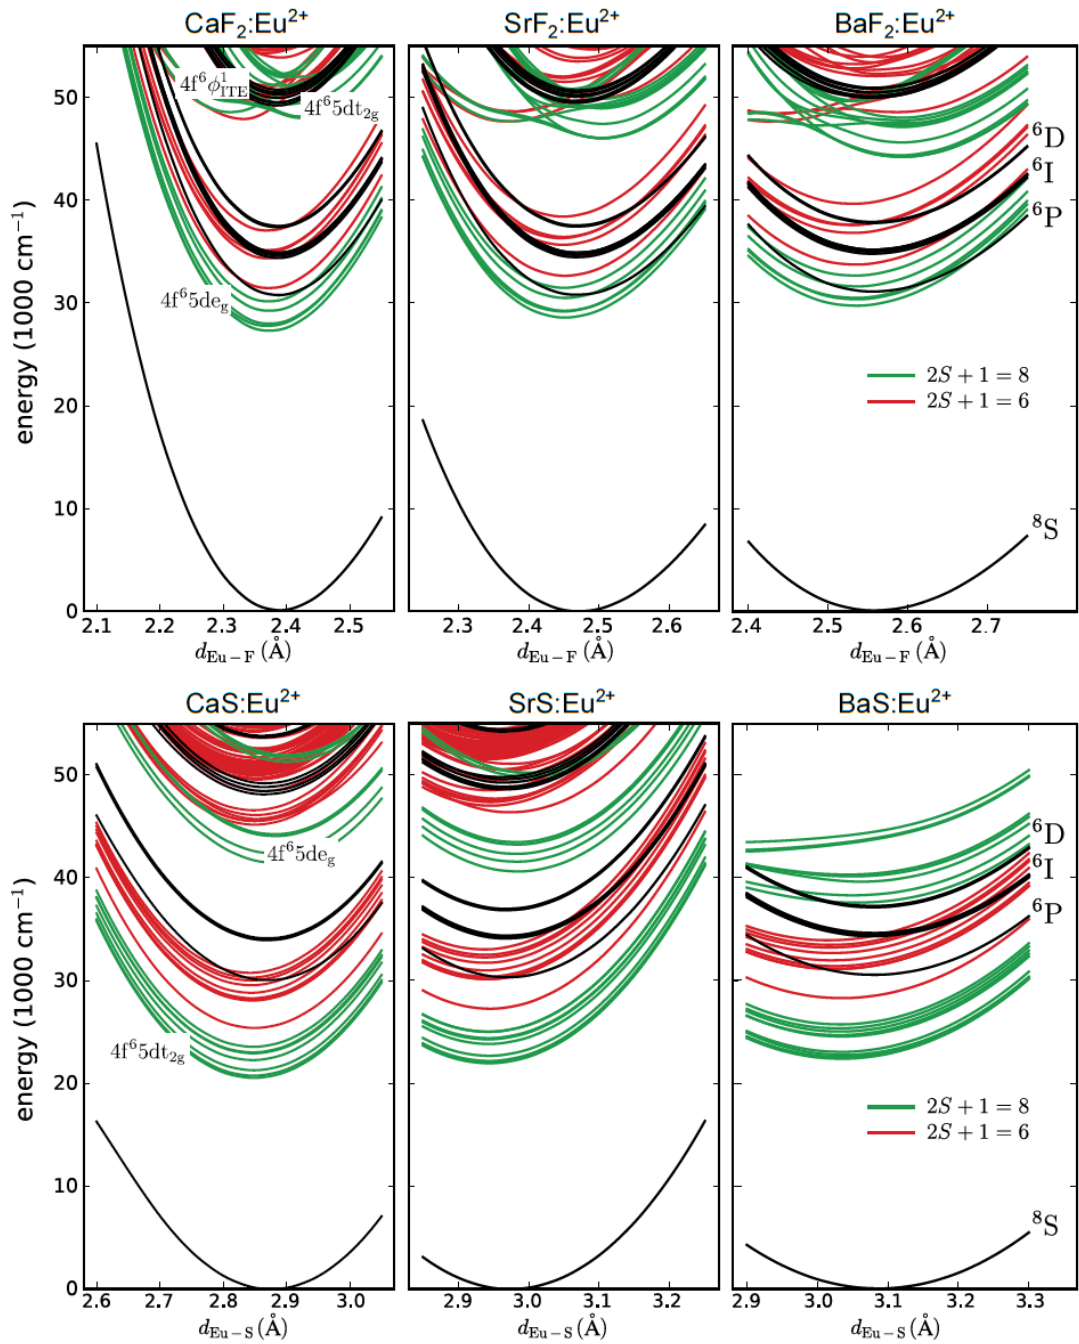

FIG. S1. Potential energy curves at spin-orbit-free MS-RASPT2 level for the  $\text{Eu}^{2+}$  impurity in the alkaline earth fluorides  $\text{CaF}_2$ ,  $\text{SrF}_2$  and  $\text{BaF}_2$  and alkaline earth sulfides  $\text{CaS}$ ,  $\text{SrS}$  and  $\text{BaS}$ . The black curves show the levels that correspond to the  $4f^7$  configuration, while green and red curves originate from the excited states with  $4f^6(5d, \text{ITE}_{a_{1g}}/6s)^1$  configurations, indicating spin-octet and spin-sextet levels respectively. Fig. 3 from the main text shows the potential energy curves after spin-orbit coupling is included.



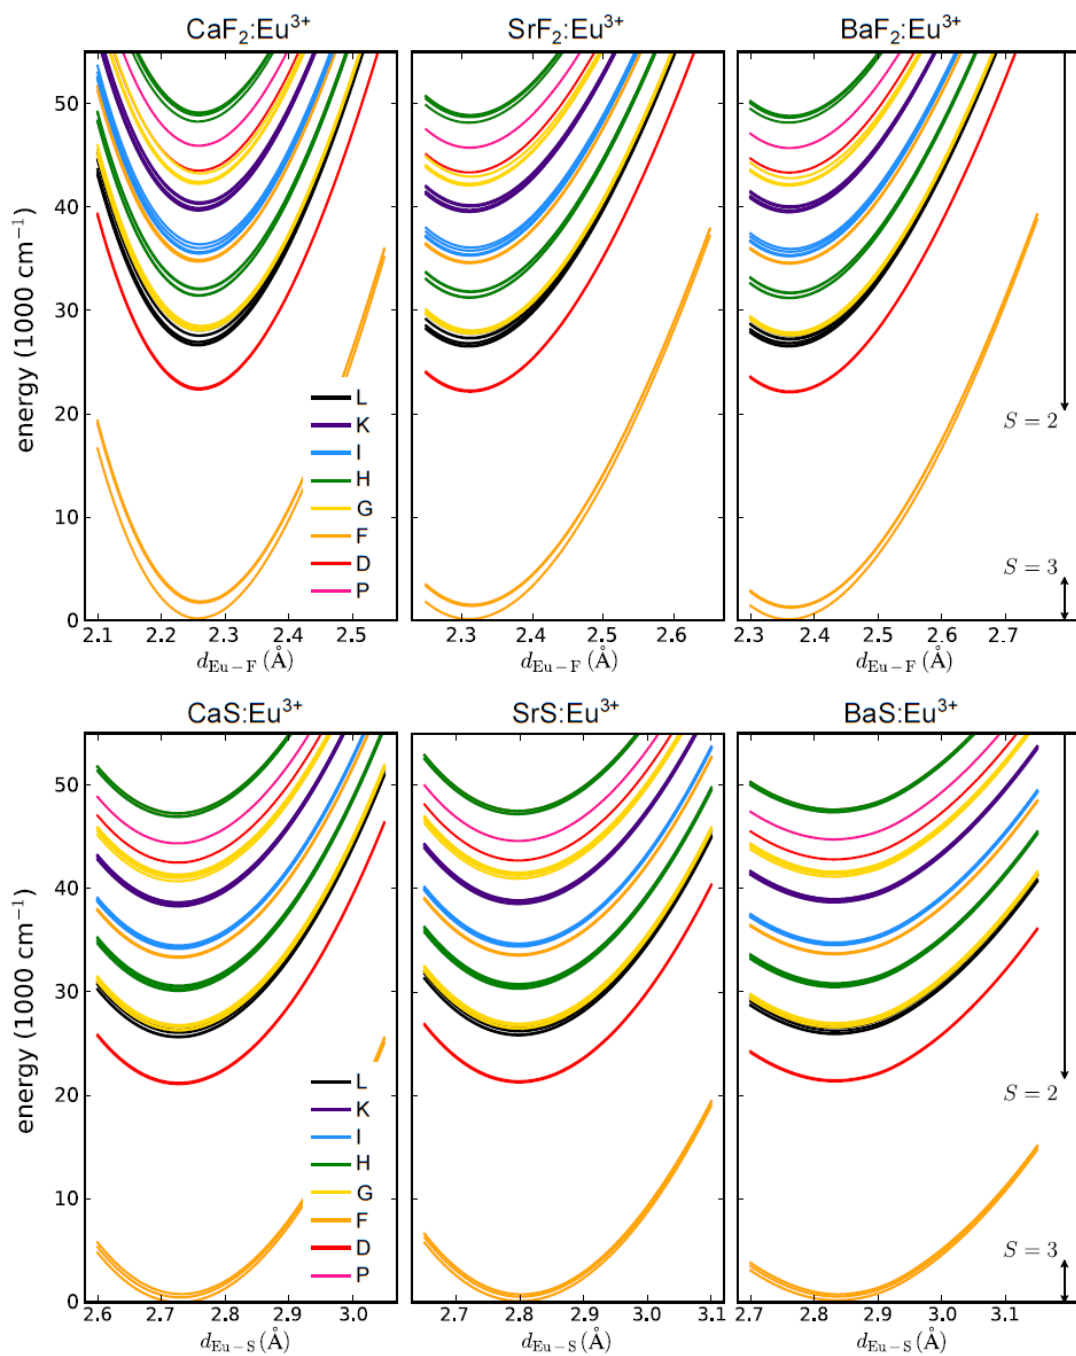

FIG. S2. Potential energy curves at spin-orbit-free MS-RASPT2 level for states of the  $4f^6$  configuration of the  $\text{Eu}^{3+}$  impurity in the alkaline earth fluorides  $\text{CaF}_2$ ,  $\text{SrF}_2$  and  $\text{BaF}_2$  and alkaline earth sulfides  $\text{CaS}$ ,  $\text{SrS}$  and  $\text{BaS}$ . The color of the curves denotes the main  $L$  value of the associated  $^{2S+1}L$  term.

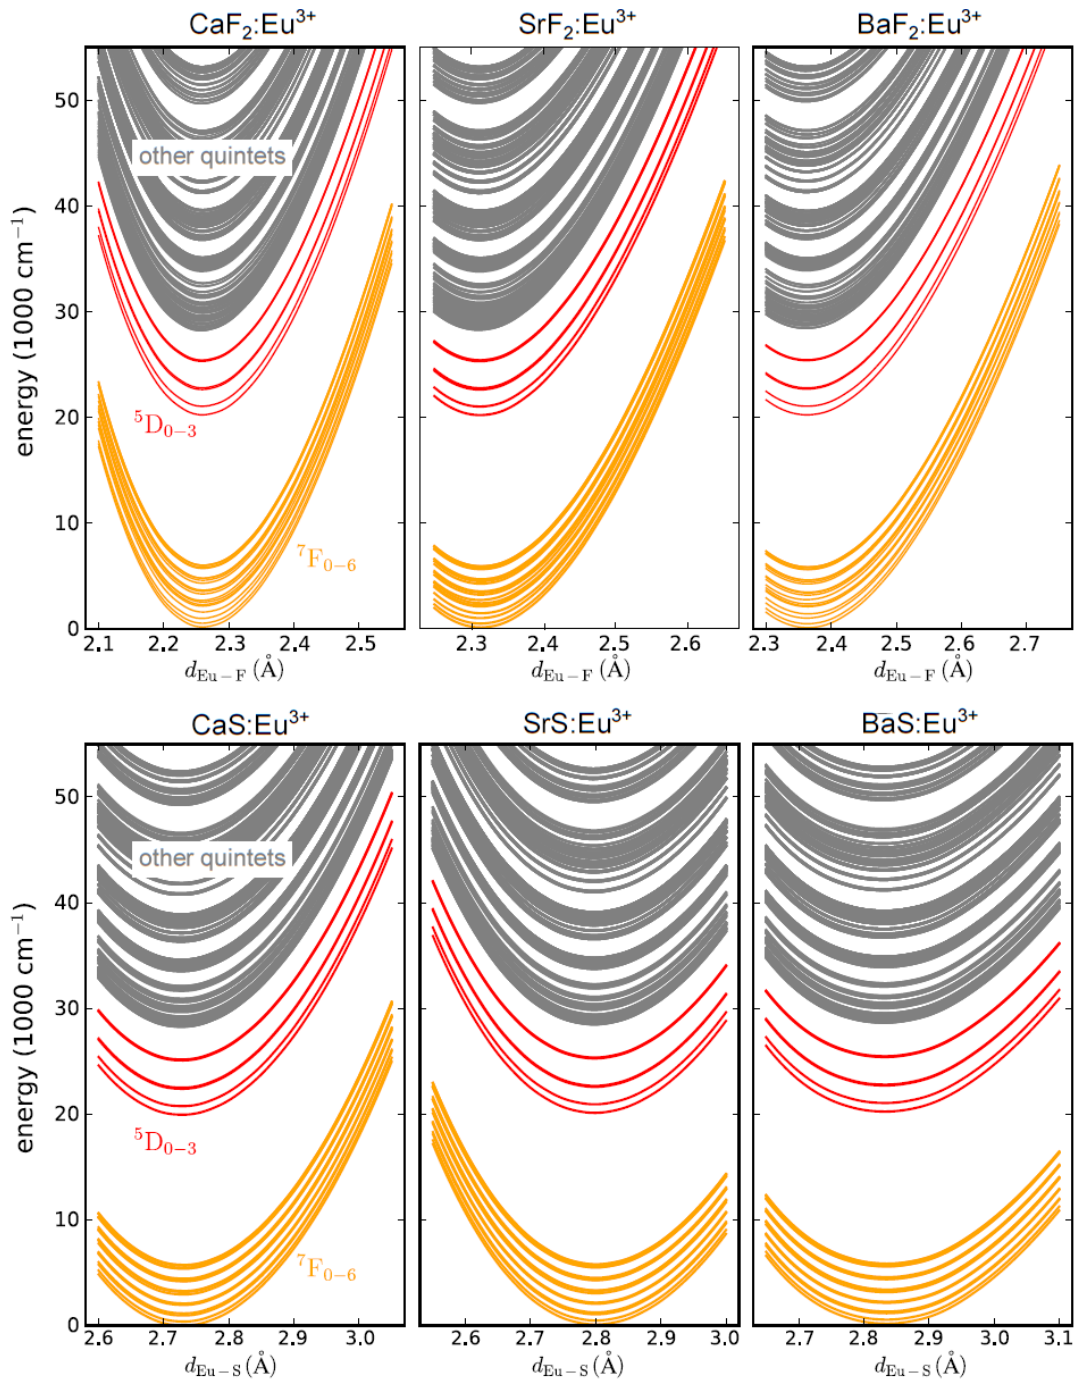

FIG. S3. Potential energy curves after spin-orbit coupling (at RASSI-SO level) for states of the  $4f^6$  configuration of the  $\text{Eu}^{3+}$  impurity in the alkaline earth fluorides  $\text{CaF}_2$ ,  $\text{SrF}_2$  and  $\text{BaF}_2$  and alkaline earth sulfides  $\text{CaS}$ ,  $\text{SrS}$  and  $\text{BaS}$ . The orange and red curves correspond to the low-lying  $^7\text{F}$  and  $^5\text{D}$  multiplets respectively, while the grey curves show higher levels originating from other spin-quintet multiplets.
